# Supplementary material for: Altered Tyrosine Phosphorylation of Cardiac Proteins Prompts Contractile Dysfunction in Hypertrophic Cardiomyopathy
Source: Research Square preprint supplement (doi:10.21203/rs.3.rs-100810/v1), 2020-11-12
Supplement: Supplementary file 2 [file 8c019ed140e5e521fe639179.xlsx]

## Sheet: Sheet1
Site accession	Gi Accession	Uniprot	Primary Gene Name	Phosphorylation Site	Uniprot Protein Name	logFC	Ratio TgErbB2/Control	Ordinary t-statistic	Moderated t-statistic	Ordinary p-value	Moderated p-value	Sig pval?	"-log(pval)"	Ordinary q-value	Moderated q-value	Sig q val?	Volcano color	Residual degrees of freedom	Degrees of freedom associated with estimated prior value for the variance	Estimated prior value for the variance	Sample variance	Posterior value of the variance	Protein Levels Known?2	Ntg1 log2 intensity	Ntg2 log2 intensity	Ntg3 log2 intensity	TgErbB2-1 log2 intensity	TgErbB2-2 log2 intensity	TgErbB2-3 log2 intensity
74271799 LAGISQGVYR Y9(Phospho)	74271799	Q80XL6	Acad11	323	Acyl-CoA dehydrogenase family member 11 (ACAD-11) (EC 1.3.99.-)	-0.286327	0.819987	-3.08785	-1.55347	0.0366507	0.154462	N	0.811178	0.0935767	0.139027	N	Black	4	5.07243	0.0809713	0.0128974	0.0509578	Y	1.96422	1.8507	1.68083	2.03325	2.15484	2.16664
6671509 DLYANTVLSGGTTMYPGIADR Y3(Phospho)	6671509	P60710	Actb	294	Actin, cytoplasmic 1 (Beta-actin) [Cleaved into: Actin, cytoplasmic 1, N-terminally processed]	0.549769	1.46385	2.44494	2.39999	0.0708306	0.0396908	Y	1.40131	0.0969278	0.0614495	N	Black	4	5.07243	0.0809713	0.0758434	0.0787104	Y	-1.02313	-0.279158	-0.480774	-1.07702	-1.19382	-1.16153
14192922 GYSFVTTAER Y2(Phospho)	14192922	P68033	Actc1	200	Actin, alpha cardiac muscle 1 (Alpha-cardiac actin)	-0.884713	0.541595	-3.31089	-3.56281	0.0296297	0.00601482	Y	2.22078	0.0935767	0.0432109	Y	Blue	4	5.07243	0.0809713	0.107104	0.0924932	Y	1.52712	1.5835	1.56707	1.91128	2.73415	2.6864
14192922 TTGIVLDSGDGVTHNVPIYEGYALPHAIMR Y19(Phospho)	14192922	P68033	Actc1	168	Actin, alpha cardiac muscle 1 (Alpha-cardiac actin)	0.40005	1.31955	2.39348	1.94057	0.0748842	0.083974	N	1.07586	0.0969278	0.0954575	N	Black	4	5.07243	0.0809713	0.0419044	0.0637469	Y	-1.00637	-1.04274	-0.701181	-1.35315	-1.51689	-1.0804
157951643 HRPDLIDYSK Y8(Phospho)	157951643	Q9JI91	Actn2	200	Alpha-actinin-2 (Alpha-actinin skeletal muscle isoform 2) (F-actin cross-linking protein)	0.638913	1.55716	1.62749	2.03958	0.178963	0.0715645	N	1.1453	0.135364	0.0861751	N	Black	4	5.07243	0.0809713	0.231173	0.147195	Y	1.63199	1.39639	1.79323	1.71785	0.627214	0.559808
157951643 QYEHNIINYK Y2(Phospho)	157951643	Q9JI91	Actn2	681	Alpha-actinin-2 (Alpha-actinin skeletal muscle isoform 2) (F-actin cross-linking protein)	-0.077805	0.947498	-0.462148	-0.376624	0.667994	0.71511	N	0.145627	0.28846	0.348205	N	Black	4	5.07243	0.0809713	0.0425152	0.0640162	Y	-0.196154	-0.242709	0.169307	-0.151407	0.197455	-0.082189
157951643 HTNYTMEHIR Y4(Phospho)	157951643	Q9JI91	Actn2	715	Alpha-actinin-2 (Alpha-actinin skeletal muscle isoform 2) (F-actin cross-linking protein)	-0.02453	0.983141	-0.105839	-0.105693	0.920806	0.918126	N	0.0370978	0.350962	0.391297	N	Black	4	5.07243	0.0809713	0.0805744	0.0807963	Y	-1.1017	-1.7759	-1.35738	-1.57284	-1.15486	-1.43369
157951643 VIQSYSIR Y5(Phospho)	157951643	Q9JI91	Actn2	589	Alpha-actinin-2 (Alpha-actinin skeletal muscle isoform 2) (F-actin cross-linking protein)	-0.000101667	0.99993	-0.00115719	-0.000554768	0.999132	0.999569	N	0.000187062	0.370489	0.412116	N	Black	4	5.07243	0.0809713	0.0115782	0.0503762	Y	0.735025	0.885186	0.83889	0.97108	0.73525	0.753076
31982370 IYDEVPYEK Y2(Phospho)	31982370	Q8BZI0	Afap1l1	557	Actin filament-associated protein 1-like 1 (AFAP1-like protein 1)	-0.30594	0.808915	-0.495844	-0.687497	0.646012	0.508962	N	0.293315	0.282544	0.277776	N	Black	4	5.07243	0.0809713	0.571049	0.297045	N	1.14898	-0.190441	0.233266	1.62058	0.450033	0.0390117
327412300 QVDDPPEPVYANVER Y10(Phospho)	327412300	A2AB59	Arhgap27	227	Rho GTPase-activating protein 27 (CIN85-associated multi-domain-containing Rho GTPase-activating protein 1) (Rho-type GTPase-activating protein 27)	0.0980093	1.0703	0.361584	0.391805	0.735954	0.704246	N	0.152275	0.30996	0.346919	N	Black	4	5.07243	0.0809713	0.110206	0.093861	N	-0.755048	-1.35141	-1.04136	-0.876626	-1.006	-1.55922
568958574 LDTASSNGYQRPGSVVAAK S6(Phospho)	568958574	B2RQE8	Arhgap42	756	rho GTPase-activating protein 42 isoform X1	-0.460802	0.726582	-0.582499	-0.832887	0.591486	0.42629	N	0.370295	0.273738	0.249696	N	Black	4	5.07243	0.0809713	0.938703	0.459142	N	1.6471	-0.281608	-0.335486	1.69371	0.450585	0.268116
568945784 YGEVFEPTVER Y1(Phospho)	568945784	Q00993	Axl	475	Tyrosine-protein kinase receptor UFO (EC 2.7.10.1) (Adhesion-related kinase)	1.29575	2.45505	2.87457	3.74417	0.0452597	0.00453111	Y	2.3438	0.0935767	0.0432109	Y	Yellow	4	5.07243	0.0809713	0.30478	0.179648	N	0.379957	0.26083	0.579551	-0.0322411	-1.49937	-1.1353
568945784 YVLCPSTAPGPTLSADR Y1(Phospho)	568945784	Q00993	Axl	860	Tyrosine-protein kinase receptor UFO (EC 2.7.10.1) (Adhesion-related kinase)	0.627824	1.54523	2.38602	2.54813	0.0754931	0.0311027	Y	1.5072	0.0969278	0.0573286	N	Black	4	5.07243	0.0809713	0.103853	0.0910596	N	0.329303	0.463869	0.822382	0.298222	-0.109546	-0.456594
31981530 NTYNQTALDIVNQFTTSQASR Y3(Phospho)	31981530	Q8VHK1	Caskin2	253	Caskin-2	0.659896	1.57997	2.96979	2.89523	0.0411527	0.0175887	Y	1.75477	0.0935767	0.0469082	Y	Yellow	4	5.07243	0.0809713	0.0740609	0.0779246	N	-1.01528	-0.631513	-1.11411	-1.24727	-1.74768	-1.74564
568939395 YVDSEGHLYTVPIR Y9(Phospho)	568939395	P49817	Cav1	14	Caveolin-1	-0.179291	0.883137	-0.560472	-0.653379	0.605063	0.529721	N	0.275953	0.27402	0.285005	N	Black	4	5.07243	0.0809713	0.153496	0.112947	Y	1.0216	0.286566	0.126823	0.838764	0.333282	0.800815
6679567 KSFTPDHVVYAR Y10(Phospho)	6679567	O54724	Cavin1	310	Caveolae-associated protein 1 (Cav-p60) (Cavin-1) (Polymerase I and transcript release factor)	-0.645688	0.639188	-1.69091	-2.10075	0.166116	0.0647959	N	1.18845	0.131583	0.0805828	N	Black	4	5.07243	0.0809713	0.218724	0.141706	Y	0.508508	-0.415458	-0.529626	0.830221	0.513085	0.157183
34556205 IGEGTYGVVYK Y6(Phospho)	34556205	P97377	Cdk2	15	Cyclin-dependent kinase 2 (EC 2.7.11.22) (Cell division protein kinase 2)	0.791912	1.73137	0.907241	1.3088	0.415592	0.222783	N	0.652118	0.228673	0.164085	N	Black	4	5.07243	0.0809713	1.14288	0.549162	N	0.14529	1.46532	1.91827	0.155051	-0.683236	1.68133
568942582 YEYHPVCADLQTK Y1(Phospho)	568942582	Q9CRB9	Chchd3	177	MICOS complex subunit Mic19;MICOS complex subunit Mic19 isoform X1	0.256493	1.19457	0.771075	0.912754	0.483682	0.384985	N	0.414556	0.240885	0.237445	N	Black	4	5.07243	0.0809713	0.165978	0.11845	Y	-1.22973	-1.13151	-1.51415	-1.05735	-1.45955	-2.12797
568942582 YEYHPVCADLQTK Y3(Phospho)	568942582	Q9CRB9	Chchd3	179	MICOS complex subunit Mic19;MICOS complex subunit Mic19 isoform X1	0.210791	1.15732	0.878866	0.894406	0.429101	0.394213	N	0.404269	0.228728	0.241176	N	Black	4	5.07243	0.0809713	0.0862877	0.0833153	Y	-0.766631	-1.03519	-0.714982	-0.619515	-1.32972	-1.19994
38259206 GIWHNYDK Y6(Phospho)	38259206	Q6P8J7	Ckmt2	255	Creatine kinase S-type, mitochondrial (EC 2.7.3.2) (Basic-type mitochondrial creatine kinase) (Mib-CK) (Sarcomeric mitochondrial creatine kinase) (S-MtCK)	0.321213	1.24938	1.37984	1.38134	0.239745	0.200242	N	0.698446	0.161956	0.154612	N	Black	4	5.07243	0.0809713	0.0812864	0.0811102	Y	1.27109	1.81144	1.91537	1.10767	1.43554	1.49105
38259206 RGTGGVDTAAVADVYDISNIDR Y15(Phospho)	38259206	Q6P8J7	Ckmt2	368	Creatine kinase S-type, mitochondrial (EC 2.7.3.2) (Basic-type mitochondrial creatine kinase) (Mib-CK) (Sarcomeric mitochondrial creatine kinase) (S-MtCK)	-0.104797	0.929936	-0.402954	-0.427824	0.70759	0.678755	N	0.168287	0.301739	0.336548	N	Black	4	5.07243	0.0809713	0.101456	0.0900027	Y	-1.39782	-2.26993	-1.65878	-1.70212	-1.61249	-1.69753
38259206 GTGGVDTAAVADVYDISNIDR Y14(Phospho)	38259206	Q6P8J7	Ckmt2	368	Creatine kinase S-type, mitochondrial (EC 2.7.3.2) (Basic-type mitochondrial creatine kinase) (Mib-CK) (Sarcomeric mitochondrial creatine kinase) (S-MtCK)	0.0414417	1.02914	0.0990075	0.126439	0.925896	0.902142	N	0.044725	0.350962	0.390672	N	Black	4	5.07243	0.0809713	0.262803	0.16114	Y	-1.67586	-0.554225	-0.933685	-1.56036	-0.667845	-1.05989
162287165 VWLYEGSR Y4(Phospho)	162287165	Q924X2	Cpt1b	349	Carnitine O-palmitoyltransferase 1, muscle isoform (CPT1-M) (EC 2.3.1.21) (Carnitine O-palmitoyltransferase I, muscle isoform) (CPT I) (CPTI-M) (Carnitine palmitoyltransferase 1B)	0.159342	1.11678	1.24326	0.823684	0.281665	0.431239	N	0.365282	0.182003	0.24973	N	Black	4	5.07243	0.0809713	0.0246394	0.0561348	Y	0.919929	1.11037	0.921859	0.751368	0.678963	1.0438
162287165 ALLHGNCYNR Y8(Phospho)	162287165	Q924X2	Cpt1b	449	Carnitine O-palmitoyltransferase 1, muscle isoform (CPT1-M) (EC 2.3.1.21) (Carnitine O-palmitoyltransferase I, muscle isoform) (CPT I) (CPTI-M) (Carnitine palmitoyltransferase 1B)	0.052508	1.03707	0.780535	0.292724	0.478685	0.776318	N	0.10996	0.240149	0.363091	N	Black	4	5.07243	0.0809713	0.00678823	0.0482643	Y	0.0559821	0.228548	0.220839	0.103635	0.185034	0.0591762
568967204 IYDTIHDIR Y2(Phospho)	568967204	Q65CL1	Ctnna3	614	catenin alpha-3 isoform 1;catenin alpha-3 isoform 1	-0.0420917	0.971246	-0.594594	-0.233877	0.584116	0.820272	N	0.0860419	0.273722	0.37039	N	Black	4	5.07243	0.0809713	0.00751697	0.0485856	Y	0.451382	0.597682	0.560279	0.668596	0.477169	0.589853
33563250 FANYIEK Y4(Phospho)	33563250	P31001	Des	121	Desmin	0.588842	1.50404	2.1973	2.36782	0.0929323	0.041847	Y	1.37834	0.107469	0.063492	N	Black	4	5.07243	0.0809713	0.107724	0.0927664	Y	1.89255	1.83008	1.99438	1.76733	1.32897	0.854183
190194418 YQAECSQFK Y1(Phospho)	190194418	E9Q557	Dsp	1077	Desmoplakin (DP)	0.169184	1.12442	0.591949	0.657571	0.585722	0.527143	N	0.278071	0.273722	0.285005	N	Black	4	5.07243	0.0809713	0.12253	0.0992942	Y	0.999523	1.10949	0.781077	1.32498	0.604955	0.452603
190194418 GAGGYTCQSGSGWDEFTK Y5(Phospho)	190194418	E9Q557	Dsp	184	Desmoplakin (DP)	-0.0647484	0.956112	-0.801146	-0.356101	0.467934	0.729906	N	0.136733	0.238862	0.348253	N	Black	4	5.07243	0.0809713	0.00979775	0.0495912	Y	-0.242377	-0.112446	-0.304397	-0.0482457	-0.170235	-0.246494
164607150 IYQYIQSR Y4(Phospho)	164607150	Q61214	Dyrk1a	321	Dual specificity tyrosine-phosphorylation-regulated kinase 1A (EC 2.7.12.1) (Dual specificity YAK1-related kinase) (MP86) (Protein kinase minibrain homolog) (MNBH)	0.45731	1.37298	2.06676	2.00994	0.107625	0.0750832	N	1.12446	0.111593	0.0876303	N	Black	4	5.07243	0.0809713	0.0734403	0.0776509	N	1.1654	1.24391	1.51168	1.20941	0.799699	0.53995
755515731 VYTYIQSR Y4(Phospho)	755515731	Q8BI55	Dyrk4	379	dual specificity tyrosine-phosphorylation-regulated kinase 4 isoform X1	0.93918	1.91744	1.62123	2.22519	0.180285	0.0528827	N	1.27669	0.135364	0.0729417	N	Black	4	5.07243	0.0809713	0.503383	0.267211	N	2.46239	2.55557	2.94501	2.824	1.29873	1.0227
6681273 EHALLAYTLGVK Y7(Phospho)	6681273	P62631	Eef1a2	141	Elongation factor 1-alpha 2 (EF-1-alpha-2) (Eukaryotic elongation factor 1 A-2) (eEF1A-2) (Statin-S1)	0.588859	1.50406	2.44067	2.49181	0.071157	0.0341241	Y	1.46694	0.0969278	0.0575273	N	Black	4	5.07243	0.0809713	0.0873164	0.0837688	Y	0.647775	1.21217	1.37473	0.626932	0.542516	0.29865
54873610 VLGSGAFGTVYK Y11(Phospho)	54873610	Q80TH2	Erbb2	NA	Receptor tyrosine-protein kinase erbB-2 (EC 2.7.10.1) (Proto-oncogene Neu) (Proto-oncogene c-ErbB-2) (p185erbB2) (CD antigen CD340)	0.760821	1.69445	2.60549	2.92245	0.0597024	0.0168236	Y	1.77408	0.0947313	0.0469082	Y	Yellow	4	5.07243	0.0809713	0.127902	0.101663	Y	-0.0716578	0.208825	0.724804	-0.131075	-0.57648	-0.712937
54873610 FVVIQNEDLGPSSPMDSTFYR Y20(Phospho)	54873610	Q80TH2	Erbb2	NA	Receptor tyrosine-protein kinase erbB-2 (EC 2.7.10.1) (Proto-oncogene Neu) (Proto-oncogene c-ErbB-2) (p185erbB2) (CD antigen CD340)	0.15246	1.11146	0.559117	0.607591	0.605905	0.558359	N	0.253087	0.27402	0.294154	N	Black	4	5.07243	0.0809713	0.111531	0.0944449	Y	-1.22176	-0.937773	-1.41881	-0.882062	-1.63751	-1.51615
6753866 QYALQCVQCK Y2(Phospho)	6753866	O70433	Fhl2	158	Four and a half LIM domains protein 2 (FHL-2) (Skeletal muscle LIM-protein 3) (SLIM-3)	0.007931	1.00551	0.0361503	0.0349814	0.972895	0.972852	N	0.0119532	0.362731	0.403293	N	Black	4	5.07243	0.0809713	0.0721979	0.0771031	Y	-0.783337	-0.11694	-0.705306	-0.582005	-0.421034	-0.626337
6753992 YAYFNGCSSPTAPLSPMSPPGYK Y1(Phospho)	6753992	P23242	Gja1	265	Gap junction alpha-1 protein (Connexin-43) (Cx43) (Gap junction 43 kDa heart protein)	-0.230851	0.852132	-1.79599	-1.19266	0.146923	0.26326	N	0.579615	0.125236	0.178317	N	Black	4	5.07243	0.0809713	0.0247827	0.056198	Y	-0.22238	-0.531978	-0.313881	-0.21129	-0.21899	0.0545944
72384361 GEPNVSYICSR Y7(Phospho)	72384361	Q2NL51	Gsk3a	279	Glycogen synthase kinase-3 alpha (GSK-3 alpha) (EC 2.7.11.26) (Serine/threonine-protein kinase GSK3A) (EC 2.7.11.1)	0.805591	1.74786	2.46956	2.90131	0.0689797	0.0174149	Y	1.75908	0.0969278	0.0469082	Y	Yellow	4	5.07243	0.0809713	0.159619	0.115647	N	0.56065	1.01426	1.41684	0.594225	-0.12883	0.109581
72384361 GEPNVSYICSR S6(Phospho)	72384361	Q2NL51	Gsk3a	278	Glycogen synthase kinase-3 alpha (GSK-3 alpha) (EC 2.7.11.26) (Serine/threonine-protein kinase GSK3A) (EC 2.7.11.1)	0.582235	1.49717	1.90761	2.1812	0.1291	0.0568284	N	1.24543	0.119475	0.0743297	N	Black	4	5.07243	0.0809713	0.139735	0.10688	N	0.378631	0.864913	1.04472	0.582806	-0.21899	0.177743
33859811 FVDLYGAQK Y5(Phospho)	33859811	Q8BMS1	Hadha	724	Trifunctional enzyme subunit alpha, mitochondrial (TP-alpha) [Includes: Long-chain enoyl-CoA hydratase (EC 4.2.1.17); Long chain 3-hydroxyacyl-CoA dehydrogenase (EC 1.1.1.211)]	0.463478	1.37886	2.07242	2.02796	0.106936	0.0729248	N	1.13712	0.111593	0.086441	N	Black	4	5.07243	0.0809713	0.0750227	0.0783486	Y	-0.0742991	0.275341	0.346446	0.0669131	-0.362463	-0.547397
158854012 AVCSTYLQSR Y6(Phospho)	158854012	O88904	Hipk1	352	Homeodomain-interacting protein kinase 1 (EC 2.7.11.1) (Nuclear body-associated kinase 2) (Protein kinase Myak)	0.804041	1.74599	3.3951	3.43129	0.0274008	0.00740478	Y	2.13049	0.0935767	0.0432109	Y	Yellow	4	5.07243	0.0809713	0.0841285	0.0823633	N	1.06616	1.13817	1.36482	0.788684	0.0353332	0.333009
224922824 TVCSTYLQSR Y6(Phospho)	224922824	Q9ERH7	Hipk3	359	Homeodomain-interacting protein kinase 3 (EC 2.7.11.1) (Androgen receptor-interacting nuclear protein kinase) (ANPK) (Fas-interacting serine/threonine-protein kinase) (FIST) (Nuclear body-associated kinase 3) (Nbak3)	0.101223	1.07268	0.307567	0.362586	0.773761	0.725217	N	0.139532	0.315743	0.348205	N	Black	4	5.07243	0.0809713	0.162469	0.116903	N	0.391342	0.744354	1.12066	1.14296	0.506454	0.303273
30061359 KTVTAMDVVYALKR Y10(Phospho)	30061359	P55292	Hist1h4a; Hist1h4b; Hist1h4c; Hist1h4d; Hist1h4f; Hist1h4h; Hist1h4i; Hist1h4j; Hist1h4k; Hist1h4m; Hist2h4a; Hist4h4	824	Histone H4	0.571042	1.4856	2.57524	2.50757	0.0616367	0.0332506	Y	1.4782	0.0951754	0.0573286	N	Black	4	5.07243	0.0809713	0.0737553	0.0777898	N	0.866791	1.20499	1.39859	0.759999	0.269946	0.7273
358439544 LLSYASYCIEHGDLELAAK Y7(Phospho)	358439544	Q8CAQ8	Immt	695	MICOS complex subunit Mic60 (Mitochondrial inner membrane protein) (Mitofilin)	0.0663203	1.04704	0.812762	0.364438	0.461959	0.72388	N	0.140333	0.238781	0.348205	N	Black	4	5.07243	0.0809713	0.00998752	0.0496748	Y	-0.375459	-0.61444	-0.545828	-0.609839	-0.498512	-0.626337
568977607 LIYLVPEK Y3(Phospho)	568977607	Q9Z0R6	Itsn2	554	Intersectin-2 (Itsn2 protein)	0.210234	1.15688	0.720869	0.80811	0.510871	0.439702	N	0.356842	0.250765	0.252702	N	Black	4	5.07243	0.0809713	0.127581	0.101521	N	-0.995656	-0.438868	-0.282403	-0.403607	-0.888763	-1.05526
755562827 REVGDYGQLHK Y6(Phospho)	755562827	Q62120	Jak2	570	Tyrosine-protein kinase (EC 2.7.10.2)	0.498495	1.41274	2.37128	2.23683	0.0767135	0.0518842	N	1.28496	0.0969278	0.0728897	N	Black	4	5.07243	0.0809713	0.0662895	0.0744982	N	1.01788	1.19049	1.14685	1.02726	0.424866	0.40761
755562827 EVGDYGQLHK Y5(Phospho)	755562827	Q62120	Jak2	570	Tyrosine-protein kinase (EC 2.7.10.2)	0.0636483	1.04511	0.264551	0.269683	0.804427	0.793438	N	0.100487	0.324376	0.365306	N	Black	4	5.07243	0.0809713	0.0868252	0.0835523	N	1.53286	1.01213	1.24948	1.56731	0.946395	1.08982
6754426 KGIIPEEYVLTR Y8(Phospho)	6754426	Q61743	Kcnj11	12	ATP-sensitive inward rectifier potassium channel 11 (Inward rectifier K(+) channel Kir6.2) (Potassium channel, inwardly rectifying subfamily J member 11)	0.211583	1.15796	1.15527	0.997748	0.312292	0.344268	N	0.463104	0.190245	0.21764	N	Black	4	5.07243	0.0809713	0.0503134	0.0674544	N	0.477007	0.213434	0.405403	0.474312	-0.0770152	0.0637989
134031947 KLEVYQSIADLAVGAK Y5(Phospho)	134031947	O70468	Mybpc3	544	Myosin-binding protein C	0.336804	1.26296	4.52745	1.86479	0.010598	0.0948227	N	1.02309	0.0935767	0.10457	N	Black	4	5.07243	0.0809713	0.00830115	0.0489313	Y	0.672194	0.764072	0.828807	0.519979	0.315932	0.418751
134031947 YIFESVGAK Y1(Phospho)	134031947	O70468	Mybpc3	406	Myosin-binding protein C	-0.28878	0.818594	-1.70224	-1.39473	0.163924	0.196301	N	0.707078	0.131581	0.154612	N	Black	4	5.07243	0.0809713	0.0431701	0.0643049	Y	1.72587	1.77059	1.91055	1.84959	2.39438	2.02938
134031947 KLEPAYQVNK Y6(Phospho)	134031947	O70468	Mybpc3	369	Myosin-binding protein C	0.04491	1.03162	0.317689	0.227435	0.766614	0.825128	N	0.0834785	0.315743	0.37039	N	Black	4	5.07243	0.0809713	0.0299761	0.0584877	Y	-0.0752259	-0.469242	-0.342736	-0.322037	-0.488597	-0.2113
568986973 GKLSYTQQMEDLKR Y5(Phospho)	568986973	Q02566	Myh6	1310	myosin-6 isoform X1;myosin-6 isoform X1;myosin-6 isoform X1	-1.49762	0.354137	-3.39734	-4.39987	0.0273443	0.00168775	Y	2.77269	0.0935767	0.0332595	Y	Blue	4	5.07243	0.0809713	0.291485	0.173786	Y	1.53	0.783524	1.12594	1.87659	2.98869	3.06704
568986973 TLEDQANEYR Y9(Phospho)	568986973	Q02566	Myh6	1261	myosin-6 isoform X1;myosin-6 isoform X1;myosin-6 isoform X1	-1.18176	0.440813	-3.17921	-3.91534	0.0335604	0.00348153	Y	2.45823	0.0935767	0.0432109	Y	Blue	4	5.07243	0.0809713	0.207258	0.136651	Y	-0.11962	-0.0813162	-0.579775	0.283246	1.41961	1.06172
568986973 IKELTYQTEEDKK T8(Phospho)	568986973	Q02566	Myh6	1856	myosin-6 isoform X1;myosin-6 isoform X1;myosin-6 isoform X1	-1.02238	0.492304	-2.93479	-3.53412	0.0426098	0.00629281	Y	2.20116	0.0935767	0.0432109	Y	Blue	4	5.07243	0.0809713	0.182037	0.125531	Y	0.585871	0.319064	0.171872	0.748301	1.83748	1.55816
568986973 LSYTQQMEDLKR T4(Phospho)	568986973	Q02566	Myh6	1311	myosin-6 isoform X1;myosin-6 isoform X1;myosin-6 isoform X1	-0.963963	0.512647	-2.24092	-2.88342	0.0885312	0.0179317	Y	1.74638	0.105197	0.0469082	Y	Blue	4	5.07243	0.0809713	0.277561	0.167647	Y	2.00966	2.35987	2.20533	2.33526	3.70582	3.42567
568986973 GQSVQQVYYSIGALAK Y9(Phospho)	568986973	Q02566	Myh6	423	myosin-6 isoform X1;myosin-6 isoform X1;myosin-6 isoform X1	-0.356853	0.780866	-2.01861	-1.70201	0.113677	0.122691	N	0.911186	0.113273	0.120663	N	Black	4	5.07243	0.0809713	0.0468773	0.0659394	Y	-0.586845	-0.468263	-0.46928	-0.133208	-0.458409	0.137787
568986973 LSYTQQMEDLK Y3(Phospho)	568986973	Q02566	Myh6	1310	myosin-6 isoform X1;myosin-6 isoform X1;myosin-6 isoform X1	0.271176	1.20679	7.98415	1.54795	0.00133392	0.155774	N	0.807506	0.0455062	0.139027	N	Black	4	5.07243	0.0809713	0.00173036	0.0460343	Y	0.45327	0.507551	0.495513	0.273121	0.191943	0.177743
568986973 TLEDQANEYRVK Y9(Phospho)	568986973	Q02566	Myh6	1261	myosin-6 isoform X1;myosin-6 isoform X1;myosin-6 isoform X1	-0.316428	0.803056	-1.18258	-1.2734	0.302466	0.234532	N	0.629797	0.187609	0.166281	N	Black	4	5.07243	0.0809713	0.107393	0.0926208	Y	0.158365	0.697268	0.707388	0.449804	0.97263	1.08987
568986973 LSYTQQMEDLKR Y3(Phospho)	568986973	Q02566	Myh6	1310	myosin-6 isoform X1;myosin-6 isoform X1;myosin-6 isoform X1	-0.256448	0.837146	-0.618855	-0.788077	0.569515	0.450751	N	0.346063	0.271731	0.256561	N	Black	4	5.07243	0.0809713	0.257581	0.158838	Y	0.743327	1.17584	1.0109	0.494062	1.84318	1.36217
18859641 LTYTQQLEDLKR Y3(Phospho)	18859641	Q91Z83	Myh7	1308	Myosin-7 (Myosin heavy chain 7) (Myosin heavy chain slow isoform) (MyHC-slow) (Myosin heavy chain, cardiac muscle beta isoform) (MyHC-beta)	1.26955	2.41086	2.06412	2.86056	0.107947	0.0186154	Y	1.73013	0.111593	0.0470734	Y	Yellow	4	5.07243	0.0809713	0.567436	0.295452	Y	2.25274	2.68517	2.52066	2.40332	0.799613	0.447001
33563264 ITYGQCGDVLR Y3(Phospho)	33563264	P09542	Myl3	82	Myosin light chain 3 (Myosin alkali light chain 1, ventricular/slow skeletal muscle isoform) (Myosin light chain 1, slow-twitch muscle B/ventricular isoform) (MLC1SB)	0.670434	1.59155	3.27402	3.039	0.0306728	0.0139136	Y	1.85656	0.0935767	0.0465792	Y	Yellow	4	5.07243	0.0809713	0.0628984	0.073003	Y	0.586358	0.870987	1.08319	0.46767	0.0358241	0.0257395
33563264 NKDTGTYEDFVEGLR Y7(Phospho)	33563264	P09542	Myl3	139	Myosin light chain 3 (Myosin alkali light chain 1, ventricular/slow skeletal muscle isoform) (Myosin light chain 1, slow-twitch muscle B/ventricular isoform) (MLC1SB)	-0.014935	0.989701	-0.131187	-0.0788291	0.901961	0.93888	N	0.02739	0.347923	0.391607	N	Black	4	5.07243	0.0809713	0.0194411	0.0538429	Y	1.02526	1.0614	1.23762	1.2465	1.18187	0.940715
145279175 ETHIVWYKDER Y7(Phospho)	145279175	Q62234	Myom1	1374	Myomesin-1 (Myomesin family member 1) (Skelemin)	-0.434229	0.740089	-1.75397	-1.81554	0.1543	0.102562	N	0.989014	0.12684	0.111151	N	Black	4	5.07243	0.0809713	0.0919358	0.0858055	Y	0.00791784	-0.0614244	-0.13898	-0.0942086	0.472559	0.731849
145279175 GGVSMPLSFAVTPYGYASK Y16(Phospho)	145279175	Q62234	Myom1	379	Myomesin-1 (Myomesin family member 1) (Skelemin)	0.326716	1.25416	2.23458	1.64169	0.0891568	0.134803	N	0.870302	0.105197	0.12783	N	Black	4	5.07243	0.0809713	0.0320658	0.0594091	Y	-0.442782	-0.265119	0.0173521	-0.460749	-0.54708	-0.662869
145279175 GGVSMPLSFAVTPYGYASK Y14(Phospho)	145279175	Q62234	Myom1	377	Myomesin-1 (Myomesin family member 1) (Skelemin)	-0.096299	0.93543	-1.0131	-0.520996	0.368313	0.614846	N	0.211234	0.207683	0.313044	N	Black	4	5.07243	0.0809713	0.0135528	0.0512468	Y	0.295114	0.130978	0.205032	0.459918	0.28236	0.177743
568953176 YGVHTLEINR Y1(Phospho)	568953176	Q14BI5	Myom2	209	myomesin-2 isoform X1	0.084844	1.06057	0.324279	0.345333	0.761976	0.737716	N	0.132111	0.315743	0.349779	N	Black	4	5.07243	0.0809713	0.102682	0.0905436	Y	0.557483	0.969135	1.10769	0.436129	0.805057	1.13859
568953176 SLDLSGQAFDEAYAEFQQLK Y13(Phospho)	568953176	Q14BI5	Myom2	1327	myomesin-2 isoform X1	0.0438023	1.03083	0.178809	0.184052	0.866779	0.858021	N	0.0665022	0.342816	0.378437	N	Black	4	5.07243	0.0809713	0.0900134	0.0849579	Y	-1.28596	-0.965009	-0.793042	-1.16467	-0.675258	-1.33549
10946916 SPPNPENIAPGYSGPLK Y12(Phospho)	10946916	Q9JJW5	Myoz2	127	Myozenin-2 (Calsarcin-1) (FATZ-related protein 2)	-0.0613517	0.958366	-0.3289	-0.287551	0.758731	0.780151	N	0.107821	0.315743	0.363091	N	Black	4	5.07243	0.0809713	0.0521936	0.0682833	Y	-0.488855	-0.970877	-0.512754	-0.394252	-0.692829	-0.70135
755525609 LQNTGVADGYPVRLECR Y10(Phospho)	755525609	Q9ET54	Palld	1274	Palladin	-0.160086	0.894972	-1.57153	-0.858694	0.191157	0.412621	N	0.384448	0.140242	0.246475	N	Black	4	5.07243	0.0809713	0.0155651	0.052134	Y	-0.000537123	-0.0633752	-0.23829	-0.0626308	0.0511183	0.189568
568957882 ERDYAEIQDFHR Y4(Phospho)	568957882	Q99NH2	Pard3	1076	partitioning defective 3 homolog isoform X1	-1.33939	0.395188	-3.71459	-4.52786	0.0205715	0.00140174	Y	2.85333	0.0935767	0.0332595	Y	Blue	4	5.07243	0.0809713	0.195022	0.131256	N	-1.22397	-2.15987	-2.25791	-0.777557	-0.572629	-0.273396
568961483 VPIVINPNAYDNLAIYK Y10(Phospho)	568961483	Q69Z38	Peak1	632	Pseudopodium-enriched atypical kinase 1 (EC 2.7.10.2) (Sugen kinase 269) (Tyrosine-protein kinase SgK269)	0.4707	1.38578	0.890992	1.20247	0.423284	0.259626	N	0.585652	0.228728	0.177439	N	Black	4	5.07243	0.0809713	0.418631	0.229844	N	0.932273	0.512738	0.426637	1.14955	-0.205288	-0.484713
568961483 NAIKVPIVINPNAYDNLAIYK Y14(Phospho)	568961483	Q69Z38	Peak1	632	Pseudopodium-enriched atypical kinase 1 (EC 2.7.10.2) (Sugen kinase 269) (Tyrosine-protein kinase SgK269)	-0.441697	0.736268	-0.598208	-0.849179	0.581926	0.417625	N	0.379214	0.273722	0.247515	N	Black	4	5.07243	0.0809713	0.81778	0.405827	N	1.76011	-0.257044	0.369652	1.93715	0.651799	0.60886
568961483 YQEVWTSSTSPR Y1(Phospho)	568961483	Q69Z38	Peak1	528	Pseudopodium-enriched atypical kinase 1 (EC 2.7.10.2) (Sugen kinase 269) (Tyrosine-protein kinase SgK269)	0.171577	1.12629	1.01649	0.829906	0.36688	0.427889	N	0.368669	0.207683	0.249696	N	Black	4	5.07243	0.0809713	0.0427371	0.064114	N	0.7771	0.31039	0.50664	0.561585	0.263664	0.254149
6679299 KLEAAEDIAYQLSR S13(Phospho)	6679299	P67778	Phb	252	Prohibitin (B-cell receptor-associated protein 32) (BAP 32)	0.80572	1.74802	3.4019	3.43832	0.0272296	0.00732253	Y	2.13534	0.0935767	0.0432109	Y	Yellow	4	5.07243	0.0809713	0.0841427	0.0823696	Y	0.0577471	0.707293	0.469563	-0.671268	-0.203668	-0.307622
21312960 AHYGHSEYQYAWR Y8(Phospho)	21312960	Q3TIY5	Pkp2	166	Plakophilin 2	-0.739262	0.599046	-2.68216	-2.92965	0.0551045	0.016627	Y	1.77919	0.0941702	0.0469082	Y	Blue	4	5.07243	0.0809713	0.113951	0.0955118	Y	-0.771762	-1.40942	-1.59132	-0.303043	-0.714949	-0.536725
21312960 KLKEQYQDLQMPEER Y6(Phospho)	21312960	Q3TIY5	Pkp2	573	Plakophilin 2	-0.597992	0.660673	-2.23187	-2.40485	0.0894252	0.0393748	Y	1.40478	0.105197	0.0614495	N	Black	4	5.07243	0.0809713	0.107682	0.0927481	Y	-0.0807315	-0.940122	-0.744429	0.0274416	0.111237	-0.109985
21312960 LKEQYQDLQMPEER Y5(Phospho)	21312960	Q3TIY5	Pkp2	573	Plakophilin 2	-0.717847	0.608004	-1.68239	-2.15998	0.167784	0.0588326	N	1.23038	0.131583	0.0743861	N	Black	4	5.07243	0.0809713	0.273087	0.165675	Y	-0.17836	-1.00764	-1.65062	-0.227827	-0.190274	-0.264978
21312960 YSQSIYMQNR Y6(Phospho)	21312960	Q3TIY5	Pkp2	545	Plakophilin 2	-0.251131	0.840238	-1.87809	-1.28719	0.133576	0.229897	N	0.638467	0.119828	0.166281	N	Black	4	5.07243	0.0809713	0.02682	0.0570962	Y	0.00966299	-0.33733	-0.164738	0.242315	0.0831298	-0.0644583
51491821 STTNYVDFYSTK Y5(Phospho)	51491821	Q68FH0	Pkp4	1166	Plakophilin-4 (Armadillo-related protein)	-0.0489234	0.966657	-0.471216	-0.261755	0.662037	0.799356	N	0.0972597	0.287709	0.365306	N	Black	4	5.07243	0.0809713	0.0161691	0.0524003	Y	0.113041	0.224097	0.08319	0.231899	0.00807912	0.32712
254675115 YLYGTGAVAGVYLPGSR Y12(Phospho)	254675115	Q9QXS1	Plec	3840	Plectin (PCN) (PLTN) (Plectin-1) (Plectin-6)	0.383529	1.30453	1.16437	1.37311	0.308984	0.202698	N	0.693152	0.189926	0.154612	N	Black	4	5.07243	0.0809713	0.162743	0.117024	Y	-0.880943	-0.697408	-0.889953	-0.992172	-0.784878	-1.84184
568908960 SEDIYADPAAYVMR Y5(Phospho)	568908960	Q7TQG1	Plekha6	492	pleckstrin homology domain-containing family A member 6 isoform X1	-0.369601	0.773997	-1.18817	-1.36942	0.300492	0.203806	N	0.690783	0.187609	0.154612	N	Black	4	5.07243	0.0809713	0.145144	0.109265	Y	-0.598079	-1.40523	-0.791121	-0.174454	-0.747297	-0.763877
13994195 YGQFSGLNPGGRPITPPR Y1(Phospho)	13994195	P62137	Ppp1ca	306	Serine/threonine-protein phosphatase PP1-alpha catalytic subunit (PP-1A) (EC 3.1.3.16)	0.0851204	1.06078	0.259279	0.305368	0.808217	0.766976	N	0.115218	0.324376	0.361394	N	Black	4	5.07243	0.0809713	0.161668	0.11655	N	0.000537123	-0.580887	-0.406164	0.128835	-0.800978	-0.569732
568909313 SLEEEPIYHR Y8(Phospho)	568909313	Q8BG95	Ppp1r12b	712	protein phosphatase 1 regulatory subunit 12B isoform X1	0.522703	1.43664	3.09478	2.52781	0.0364052	0.0321604	Y	1.49268	0.0935767	0.0573286	N	Black	4	5.07243	0.0809713	0.04279	0.0641373	Y	-0.0494097	-0.313785	-0.128131	-0.393013	-0.88383	-0.782591
158854005 LCDFGSASHVADNDITPYLVSR Y18(Phospho)	158854005	Q61136	Prpf4b	849	Serine/threonine-protein kinase PRP4 homolog (EC 2.7.11.1) (PRP4 pre-mRNA-processing factor 4 homolog) (Pre-mRNA protein kinase)	0.683249	1.60575	3.17558	3.03768	0.0336773	0.0139435	Y	1.85563	0.0935767	0.0465792	Y	Yellow	4	5.07243	0.0809713	0.069439	0.0758868	N	-0.902389	-0.365619	-0.650164	-1.09527	-1.26903	-1.60362
568991309 YMEDSTYYK Y7(Phospho)	568991309	P34152	Ptk2	576	focal adhesion kinase 1 isoform X1;focal adhesion kinase 1 isoform X1	0.241976	1.18261	0.578751	0.738869	0.593783	0.478665	N	0.319968	0.273738	0.265055	N	Black	4	5.07243	0.0809713	0.262212	0.16088	N	0.782454	0.125916	-0.114111	0.64301	-0.430494	-0.144185
568936939 AGEEEHVYSFPNK Y8(Phospho)	568936939	E9Q557	Pxn	118	paxillin isoform X1	-0.591878	0.663479	-0.82131	-1.16266	0.4576	0.274637	N	0.56124	0.238781	0.184377	N	Black	4	5.07243	0.0809713	0.779007	0.388733	N	1.58688	-0.454055	-0.514153	1.21021	0.583183	0.600913
61676215 IFASGLASGANYK Y12(Phospho)	61676215	Q3U0S6	Rasip1	158	Ras-interacting protein 1 (Rain)	0.630476	1.54808	3.17168	2.8897	0.0338035	0.0177487	Y	1.75083	0.0935767	0.0469082	Y	Yellow	4	5.07243	0.0809713	0.0592721	0.0714042	Y	-0.398978	-0.0619813	0.0853074	-0.519503	-0.996559	-0.751017
755558856 DYLHLPPEIVPATLR Y2(Phospho)	755558856	P63325	Rps10	82	40S ribosomal protein S10 isoform X1;40S ribosomal protein S10 isoform X1	0.585934	1.50101	2.63358	2.56936	0.0579686	0.0300342	Y	1.52238	0.0941702	0.0573286	N	Black	4	5.07243	0.0809713	0.0742499	0.0780079	Y	0.120694	0.483964	0.0723016	-0.197146	-0.162722	-0.720974
568987089 TTGFGMIYDSLDYAK Y13(Phospho)	568987089	P62849	Rps24	81	40S ribosomal protein S24 isoform X1	0.812903	1.75674	3.1343	3.32314	0.0350397	0.00879784	Y	2.05562	0.0935767	0.0465792	Y	Yellow	4	5.07243	0.0809713	0.100899	0.0897575	Y	0.0472931	0.618166	0.703446	-0.115519	-0.301291	-0.652995
902763256 LVQSPNSYFMDVK S7(Phospho)	902763256	Q6ZWY3	Rps27l	30	40S ribosomal protein S27	0.534169	1.44811	3.67161	2.68725	0.0213608	0.0247385	Y	1.60663	0.0935767	0.0573286	N	Black	4	5.07243	0.0809713	0.0317493	0.0592695	Y	-0.544137	-0.199652	-0.356407	-0.692236	-0.972136	-1.03833
568981695 IIYNNLGIDEGAWMK Y3(Phospho)	568981695	E9Q401	Ryr2	3284	ryanodine receptor 2 isoform X6	0.047186	1.03325	0.39111	0.246651	0.715655	0.810669	N	0.0911564	0.303283	0.368258	N	Black	4	5.07243	0.0809713	0.0218333	0.0548976	Y	-0.444195	-0.26432	-0.174464	-0.263984	-0.237817	-0.522736
71896543 RRPRPSGPDSPYANLGAFSASLFAPSKPQR S10(Phospho)	71896543	Q4ACU6	Shank3	928	SH3 and multiple ankyrin repeat domains protein 3 (Shank3) (Proline-rich synapse-associated protein 2) (ProSAP2) (SPANK-2)	-0.900553	0.535681	-3.09032	-3.46311	0.0365628	0.00704031	Y	2.15241	0.0935767	0.0432109	Y	Blue	4	5.07243	0.0809713	0.12738	0.101433	Y	-1.58443	-1.7248	-1.79718	-0.232842	-1.10737	-1.06454
71896543 RRPRPSGPDSPYANLGAFSASLFAPSKPQR Y12(Phospho)	71896543	Q4ACU6	Shank3	930	SH3 and multiple ankyrin repeat domains protein 3 (Shank3) (Proline-rich synapse-associated protein 2) (ProSAP2) (SPANK-2)	-0.892517	0.538673	-1.61656	-2.20005	0.181279	0.0551039	N	1.25882	0.135364	0.0733385	N	Black	4	5.07243	0.0809713	0.457236	0.246865	Y	-0.479699	-1.76993	-1.35229	0.492605	-0.695169	-0.721803
148747424 AAYFGVYDTAK Y3(Phospho)	148747424	P48962	Slc25a4	191	ADP/ATP translocase 1 (ADP,ATP carrier protein 1) (ADP,ATP carrier protein, heart/skeletal muscle isoform T1) (Adenine nucleotide translocator 1) (ANT 1) (Solute carrier family 25 member 4) (mANC1)	0.62354	1.54065	3.03072	2.82137	0.0387532	0.0198493	Y	1.70225	0.0935767	0.0485745	Y	Yellow	4	5.07243	0.0809713	0.0634933	0.0732653	Y	0.825238	1.37277	1.41592	0.480926	0.52615	0.736233
148747424 AAYFGVYDTAK Y7(Phospho)	148747424	P48962	Slc25a4	195	ADP/ATP translocase 1 (ADP,ATP carrier protein 1) (ADP,ATP carrier protein, heart/skeletal muscle isoform T1) (Adenine nucleotide translocator 1) (ANT 1) (Solute carrier family 25 member 4) (mANC1)	0.595231	1.51071	2.63941	2.59523	0.0576162	0.0287819	Y	1.54088	0.0941702	0.0573286	N	Black	4	5.07243	0.0809713	0.0762869	0.078906	Y	0.326241	0.915997	1.05845	0.220791	0.154718	0.139486
22094075 AAYFGIYDTAK Y7(Phospho)	22094075	P51881	Slc25a5	195	ADP/ATP translocase 2 (ADP,ATP carrier protein 2) (Adenine nucleotide translocator 2) (ANT 2) (Solute carrier family 25 member 5) [Cleaved into: ADP/ATP translocase 2, N-terminally processed]	0.803603	1.74546	2.84286	3.14208	0.0467322	0.0117723	Y	1.92914	0.0937793	0.0465792	Y	Yellow	4	5.07243	0.0809713	0.119857	0.0981159	Y	-0.168221	0.462996	0.534438	-0.260715	-0.852559	-0.468323
22094075 AAYFGIYDTAK Y3(Phospho)	22094075	P51881	Slc25a5	191	ADP/ATP translocase 2 (ADP,ATP carrier protein 2) (Adenine nucleotide translocator 2) (ANT 2) (Solute carrier family 25 member 5) [Cleaved into: ADP/ATP translocase 2, N-terminally processed]	0.711269	1.63724	2.13798	2.53093	0.0993127	0.0319958	Y	1.49491	0.109802	0.0573286	N	Black	4	5.07243	0.0809713	0.166016	0.118467	Y	-0.22238	0.27079	0.304032	-0.0500772	-0.712637	-1.01865
236461014 QEPVFADTNLYVLR Y11(Phospho)	236461014	P97443	Smyd1	349	Histone-lysine N-methyltransferase Smyd1 (EC 2.1.1.43) (CD8b-opposite) (SET and MYND domain-containing protein 1) (Zinc finger protein BOP) (m-BOP)	-0.271385	0.828524	-0.916842	-1.03457	0.411102	0.327659	N	0.484578	0.228042	0.210149	N	Black	4	5.07243	0.0809713	0.131424	0.103216	Y	-0.376585	-0.0874933	-0.0745799	-0.458132	0.449545	0.284085
755562948 SIYEYQPGK Y3(Phospho)	755562948	Q62417	Sorbs1	325	sorbin and SH3 domain-containing protein 1 isoform X19	-0.845623	0.55647	-1.90922	-2.47566	0.128861	0.0350436	Y	1.45539	0.119475	0.057793	N	Black	4	5.07243	0.0809713	0.29426	0.17501	Y	0.875864	-0.500269	-0.271653	1.10922	0.692266	0.839326
755562948 TPVDYIDLPYSSSPSR Y10(Phospho)	755562948	Q62417	Sorbs1	1198	sorbin and SH3 domain-containing protein 1 isoform X19	-0.240055	0.846713	-1.02616	-1.03009	0.362815	0.329647	N	0.481951	0.207683	0.210149	N	Black	4	5.07243	0.0809713	0.0820884	0.0814639	Y	-0.110659	-0.342722	-0.691687	0.119091	-0.105694	-0.438299
755562948 KLAPVQVLEYGEAIAK Y10(Phospho)	755562948	Q62417	Sorbs1	1125	sorbin and SH3 domain-containing protein 1 isoform X19	0.0338499	1.02374	0.14615	0.145894	0.890872	0.887195	N	0.0519808	0.347923	0.386807	N	Black	4	5.07243	0.0809713	0.0804649	0.080748	Y	-0.522685	0.0529848	0.136432	0.018192	-0.116179	-0.336831
755525409 FFGTFPGNYVK Y9(Phospho)	755525409	Q3UTJ2	Sorbs2	1176	sorbin and SH3 domain-containing protein 2 isoform X1	0.520173	1.43413	2.73383	2.42156	0.0522365	0.0383073	Y	1.41672	0.0941702	0.0614495	N	Black	4	5.07243	0.0809713	0.0543057	0.0692146	Y	-0.621369	-0.648791	-1.08945	-1.24727	-1.52867	-1.14419
568970047 QNLLSQSHAYQQFLR Y10(Phospho)	568970047	Q62261	Sptbn1	1171	Spectrin beta chain, non-erythrocytic 1 (Beta-II spectrin) (Embryonic liver fodrin) (Fodrin beta chain)	0.377788	1.29935	1.86743	1.72032	0.135232	0.119216	N	0.923666	0.119828	0.120586	N	Black	4	5.07243	0.0809713	0.0613901	0.072338	Y	-0.736786	-0.631616	-0.613468	-0.643014	-1.20305	-1.26917
568994402 YQLYTGAEPTTSEFTVLMHGPK Y1(Phospho)	568994402	Q7TQ48	Srl	558	sarcalumenin isoform X1	0.277831	1.21237	2.15759	1.43487	0.0971516	0.184884	N	0.733102	0.109802	0.154537	N	Black	4	5.07243	0.0809713	0.0248724	0.0562375	Y	-0.322607	-0.153466	-0.342736	-0.778594	-0.440017	-0.433692
755523282 ENPYEDVDLK Y4(Phospho)	755523282	Q924W7	St5	498	suppression of tumorigenicity 5 protein isoform X1;suppression of tumorigenicity 5 protein isoform X1;suppression of tumorigenicity 5 protein isoform X1;suppression of tumorigenicity 5 protein isoform X1;suppression of tumorigenicity 5 protein isoform X1;suppression of tumorigenicity 5 protein isoform X1	0.326655	1.2541	2.98797	1.73492	0.0404191	0.116511	N	0.933633	0.0935767	0.119443	N	Black	4	5.07243	0.0809713	0.0179275	0.0531755	N	0.309526	0.13431	0.27471	0.10188	-0.160335	-0.202965
47458804 YCRPESQEHPEADPGSAAPYLK Y20(Phospho)	47458804	P42227	Stat3	705	Signal transducer and activator of transcription 3 (Acute-phase response factor)	0.40444	1.32357	1.76489	1.75126	0.152345	0.113549	N	0.944816	0.126761	0.118001	N	Black	4	5.07243	0.0809713	0.0787706	0.080001	N	-0.188456	-0.544826	0.161703	-0.677254	-0.387498	-0.720146
165932366 AADGYVKPQIK Y5(Phospho)	165932366	P42232	Stat5b	699	Signal transducer and activator of transcription 5B	0.847252	1.79907	2.89252	3.24886	0.0444505	0.00991076	Y	2.00389	0.0935767	0.0465792	Y	Yellow	4	5.07243	0.0809713	0.128696	0.102013	N	1.79924	0.998537	1.23736	0.666406	0.154469	0.672507
6678393 AYATEPHAK Y2(Phospho)	6678393	P48787	Tnni3	30	Troponin I, cardiac muscle (Cardiac troponin I)	-1.11833	0.460625	-2.28018	-3.02986	0.0847696	0.014122	Y	1.8501	0.105159	0.0465792	Y	Blue	4	5.07243	0.0809713	0.360824	0.204357	Y	1.12027	-0.415458	-0.177735	1.49497	1.28337	1.10374
568906124 VVGHTQGPLDGSLYAK Y14(Phospho)	568906124	E9Q0S6	Tns1	537	tensin 1 isoform X1	-0.164802	0.892051	-0.558253	-0.629197	0.606442	0.544736	N	0.263814	0.27402	0.290334	N	Black	4	5.07243	0.0809713	0.130724	0.102907	Y	0.491174	-0.262356	-0.107601	0.574432	-0.00807912	0.0492713
568906124 AGSLPNYATINGK Y7(Phospho)	568906124	E9Q0S6	Tns1	1558	tensin 1 isoform X1	0.0207983	1.01452	0.0799306	0.0848859	0.940132	0.934196	N	0.0295621	0.354389	0.391607	N	Black	4	5.07243	0.0809713	0.10156	0.0900488	Y	1.5576	0.909265	1.06702	1.44721	0.8518	1.17248
256000780 HIAEDADRKYEEVAR Y10(Phospho)	256000780	P58771	Tpm1	162	Tropomyosin alpha-1 chain (Alpha-tropomyosin) (Tropomyosin-1)	-1.07485	0.47472	-2.75732	-3.44797	0.0509899	0.00721132	Y	2.14199	0.0941702	0.0432109	Y	Blue	4	5.07243	0.0809713	0.227937	0.145768	Y	0.22935	0.163417	0.0134997	0.442132	1.62762	1.56107
256000780 SIDDLEDELYAQK Y10(Phospho)	256000780	P58771	Tpm1	261	Tropomyosin alpha-1 chain (Alpha-tropomyosin) (Tropomyosin-1)	0.278673	1.21308	2.01188	1.41768	0.114553	0.189703	N	0.721926	0.113273	0.154537	N	Black	4	5.07243	0.0809713	0.028779	0.0579599	Y	-0.108436	-0.0518408	-0.0346978	-0.338218	-0.109646	-0.58313
568916277 ICAENKYGVGDPILTEPAIAK Y7(Phospho)	568916277	A2ASS6	Ttn	21257	titin isoform X1	-1.20512	0.433733	-4.05944	-4.58657	0.0153557	0.0012883	Y	2.88998	0.0935767	0.0332595	Y	Blue	4	5.07243	0.0809713	0.132197	0.103556	Y	-1.06651	-1.46924	-1.2172	-0.572845	0.0963656	0.338897
568916277 AVNKYGIGEPLESEPVVAK Y5(Phospho)	568916277	A2ASS6	Ttn	28835	titin isoform X1	-0.871389	0.54662	-5.37273	-4.26319	0.00579674	0.00206326	Y	2.68545	0.0929234	0.0332595	Y	Blue	4	5.07243	0.0809713	0.0394572	0.0626679	Y	0.420389	0.175541	0.34755	0.902757	1.27279	1.3821
568916277 YDRPGRPDPPEVTK Y1(Phospho)	568916277	A2ASS6	Ttn	20182	titin isoform X1	-0.875471	0.545076	-5.1361	-4.22234	0.00680966	0.0021921	Y	2.65914	0.0929234	0.0332595	Y	Blue	4	5.07243	0.0809713	0.043582	0.0644865	Y	-0.647132	-0.683981	-0.271653	0.178657	0.298859	0.54613
568916277 ILVPSTGYPRPK Y8(Phospho)	568916277	A2ASS6	Ttn	15210	titin isoform X1	-0.880175	0.543301	-2.53726	-3.05076	0.0641671	0.0136502	Y	1.86486	0.0951754	0.0465792	Y	Blue	4	5.07243	0.0809713	0.180509	0.124857	Y	1.0351	1.04903	0.890644	1.18575	2.19575	2.2338
568916277 LLEGHEYVFR Y7(Phospho)	568916277	A2ASS6	Ttn	18076	titin isoform X1	0.598241	1.51387	4.24356	3.03151	0.0132258	0.014084	Y	1.85127	0.0935767	0.0465792	Y	Yellow	4	5.07243	0.0809713	0.0298114	0.0584151	Y	0.345497	0.69602	0.79215	0.00831905	-0.0505567	0.0811816
568916277 WYHNGVELQESSK Y2(Phospho)	568916277	A2ASS6	Ttn	34197	titin isoform X1	-0.556929	0.679747	-3.22494	-2.67551	0.0321296	0.0252209	Y	1.59824	0.0935767	0.0573286	N	Black	4	5.07243	0.0809713	0.0447352	0.0649949	Y	0.150909	0.0422584	0.177655	0.347376	0.879999	0.814235
568916277 DGLPLKESEYVR Y10(Phospho)	568916277	A2ASS6	Ttn	29398	titin isoform X1	-0.58585	0.666257	-2.77993	-2.62625	0.049822	0.0273494	Y	1.56305	0.0941702	0.0573286	N	Black	4	5.07243	0.0809713	0.0666187	0.0746433	Y	1.07541	1.15921	1.23861	1.34235	2.02057	1.86786
568916277 YGIGEPLDSEPETAR Y1(Phospho)	568916277	A2ASS6	Ttn	18086	titin isoform X1	-0.78763	0.579295	-2.11338	-2.60497	0.102101	0.0283243	Y	1.54784	0.110575	0.0573286	N	Black	4	5.07243	0.0809713	0.208344	0.137129	Y	-1.53466	-1.73843	-2.0179	-1.6287	-0.845531	-0.45387
568916277 VYDTPGPCPSVSVK Y2(Phospho)	568916277	A2ASS6	Ttn	31324	titin isoform X1	-0.739136	0.599098	-2.13383	-2.56431	0.0997777	0.030285	Y	1.51877	0.109802	0.0573286	N	Black	4	5.07243	0.0809713	0.179979	0.124624	Y	-0.499034	-1.16585	-1.08945	-0.726879	0.13536	0.0545944
568916277 TTARDPIYPPDPPIK Y8(Phospho)	568916277	A2ASS6	Ttn	17799	titin isoform X1	-0.613362	0.653672	-2.38204	-2.51636	0.0758208	0.0327725	Y	1.48449	0.0969278	0.0573286	N	Black	4	5.07243	0.0809713	0.0994549	0.0891207	Y	-0.949695	-0.834006	-0.842809	-0.726879	-0.210816	0.15127
568916277 LTVLEGDPYFTGK Y9(Phospho)	568916277	A2ASS6	Ttn	13808	titin isoform X1	-0.704386	0.613704	-1.87697	-2.31884	0.133749	0.0453542	Y	1.34338	0.119828	0.067464	N	Black	4	5.07243	0.0809713	0.21125	0.138411	Y	-0.654015	-0.0452797	-0.0149933	-0.156613	0.81678	0.738702
568916277 VSELTEGVPYYFR Y11(Phospho)	568916277	A2ASS6	Ttn	30308	titin isoform X1	0.475345	1.39025	2.63464	2.25252	0.0579041	0.0505677	N	1.29613	0.0941702	0.0728897	N	Black	4	5.07243	0.0809713	0.0488276	0.0667993	Y	-0.640663	-0.510655	-0.185387	-1.06801	-0.684789	-1.00994
568916277 NVHVEVYDRPSPPR Y7(Phospho)	568916277	A2ASS6	Ttn	17284	titin isoform X1	-0.395282	0.760341	-9.21147	-2.24531	0.000771722	0.0511685	N	1.291	0.0455062	0.0728897	N	Black	4	5.07243	0.0809713	0.00276215	0.0464892	Y	0.0724049	0.0839358	-0.0134997	0.428786	0.500355	0.399546
568916277 LLLQAAPQFHPGYPLK Y13(Phospho)	568916277	A2ASS6	Ttn	32421	titin isoform X1	0.549483	1.46356	2.04273	2.2053	0.1106	0.0546328	N	1.26255	0.112629	0.0733385	N	Black	4	5.07243	0.0809713	0.108537	0.0931248	Y	-0.847872	-0.555604	-0.411974	-1.01822	-0.830699	-1.61498
568916277 AVNKYGLGVPVESEPIVAR Y5(Phospho)	568916277	A2ASS6	Ttn	31009	titin isoform X1	-0.571238	0.673039	-1.9044	-2.16139	0.12958	0.0586974	N	1.23138	0.119475	0.0743861	N	Black	4	5.07243	0.0809713	0.134962	0.104776	Y	-0.50329	-1.18189	-0.488479	-0.540524	0.0638012	0.0167786
568916277 VTGYPQPK Y4(Phospho)	568916277	A2ASS6	Ttn	1873	titin isoform X1	0.552896	1.46703	1.82399	2.07949	0.142216	0.0670751	N	1.17344	0.122826	0.0820719	N	Black	4	5.07243	0.0809713	0.137826	0.106038	Y	0.547137	0.992978	0.928774	0.394837	0.661429	-0.246065
568916277 LYVEPAAPFSAPTYMPTPEAVSR Y2(Phospho)	568916277	A2ASS6	Ttn	1382	titin isoform X1	0.400422	1.31989	2.37772	1.93812	0.076178	0.0843064	N	1.07414	0.0969278	0.0954575	N	Black	4	5.07243	0.0809713	0.0425408	0.0640274	Y	-0.787805	-0.911227	-0.650841	-0.910888	-1.43099	-1.20926
568916277 TQITTTMYTVTGLVPDAEYQFR Y8(Phospho)	568916277	A2ASS6	Ttn	32178	titin isoform X1	0.33214	1.25888	5.50033	1.86288	0.00532698	0.0951114	N	1.02177	0.0929234	0.10457	N	Black	4	5.07243	0.0809713	0.00546961	0.0476829	Y	-1.01372	-1.12988	-1.16843	-1.37522	-1.42576	-1.50747
568916277 AKTEIVSTDYTTTLTVK Y10(Phospho)	568916277	A2ASS6	Ttn	27632	titin isoform X1	-0.414056	0.750511	-1.78579	-1.78374	0.148678	0.107869	N	0.967105	0.125236	0.115255	N	Black	4	5.07243	0.0809713	0.0806394	0.080825	Y	-0.975072	-1.3623	-1.49864	-1.20226	-0.651077	-0.740508
568916277 WYHNDVELK Y2(Phospho)	568916277	A2ASS6	Ttn	2306	titin isoform X1	0.32881	1.25598	2.54267	1.69675	0.0637997	0.123707	N	0.907607	0.0951754	0.120663	N	Black	4	5.07243	0.0809713	0.0250843	0.0563309	Y	0.792072	0.912807	0.879657	0.332828	0.76037	0.504907
568916277 MVWSTYSANVLTPSATVTR Y6(Phospho)	568916277	A2ASS6	Ttn	20135	titin isoform X1	0.456001	1.37173	1.41404	1.65374	0.230248	0.132298	N	0.878446	0.157096	0.127043	N	Black	4	5.07243	0.0809713	0.155992	0.114048	Y	-0.40314	0.197252	0.092549	-0.522731	-0.0226892	-0.935922
568916277 KSYAAVVTNCHK S2(Phospho)	568916277	A2ASS6	Ttn	24868	titin isoform X1	-0.307138	0.808244	-2.65249	-1.61669	0.056834	0.140132	N	0.853463	0.0941702	0.131243	N	Black	4	5.07243	0.0809713	0.0201118	0.0541386	Y	-0.841635	-0.61444	-0.842809	-0.619238	-0.440017	-0.318215
568916277 ISWYKEEQLLSTGFK Y4(Phospho)	568916277	A2ASS6	Ttn	3279	titin isoform X1	-0.388432	0.763959	-1.43885	-1.55606	0.22359	0.153849	N	0.812906	0.154316	0.139027	N	Black	4	5.07243	0.0809713	0.109317	0.093469	Y	-0.762635	0.0139088	-0.43185	-0.242848	0.269934	-0.0423648
568916277 IENLQEGCSYYFR Y11(Phospho)	568916277	A2ASS6	Ttn	27058	titin isoform X1	-0.35394	0.782445	-1.47791	-1.50282	0.213501	0.166867	N	0.777629	0.151739	0.147197	N	Black	4	5.07243	0.0809713	0.0860304	0.0832018	Y	0.0489679	0.15933	0.209016	0.0577976	0.863214	0.558121
568916277 DTLPEDTGYYR Y9(Phospho)	568916277	A2ASS6	Ttn	33653	titin isoform X1	-0.289204	0.818354	-1.97487	-1.45264	0.119501	0.180016	N	0.744689	0.116478	0.154537	N	Black	4	5.07243	0.0809713	0.0321677	0.059454	Y	-0.26843	-0.514818	-0.130376	-0.0812153	0.169764	-0.134562
568916277 QVTEITEIEEEYEISRR Y12(Phospho)	568916277	A2ASS6	Ttn	34040	titin isoform X1	-0.39397	0.761033	-1.2376	-1.43992	0.283546	0.183489	N	0.736389	0.182003	0.154537	N	Black	4	5.07243	0.0809713	0.152005	0.11229	Y	-0.89732	-1.87194	-1.36493	-0.68714	-1.14909	-1.11605
568916277 YGVGEPLESAPVLMK Y1(Phospho)	568916277	A2ASS6	Ttn	25588	titin isoform X1	0.321019	1.24921	1.48613	1.42495	0.211438	0.187652	N	0.726646	0.151739	0.154537	N	Black	4	5.07243	0.0809713	0.0699909	0.0761301	Y	-0.464404	-0.00342903	0.262474	-0.343455	-0.356493	-0.468469
568916277 YGVGEGLK Y1(Phospho)	568916277	A2ASS6	Ttn	21945	titin isoform X1	-0.346838	0.786305	-1.33961	-1.41908	0.251418	0.189304	N	0.72284	0.166544	0.154537	N	Black	4	5.07243	0.0809713	0.100552	0.0896043	Y	1.05079	1.08613	1.04458	0.890985	1.69073	1.6403
568916277 VEAHVYGKPNPICK Y6(Phospho)	568916277	A2ASS6	Ttn	20712	titin isoform X1	-0.439623	0.737327	-1.12911	-1.41141	0.321979	0.191486	N	0.717863	0.191183	0.154537	N	Black	4	5.07243	0.0809713	0.227393	0.145528	Y	1.03628	0.96712	1.13386	0.76065	2.07979	1.61569
568916277 AAWYTIDSR Y4(Phospho)	568916277	A2ASS6	Ttn	32065	titin isoform X1	-0.268647	0.830098	-1.92559	-1.36451	0.126455	0.205293	N	0.687627	0.119475	0.154612	N	Black	4	5.07243	0.0809713	0.0291961	0.0581438	Y	1.03418	1.0395	1.28191	1.20675	1.5955	1.35928
568916277 VASIEIGPVSGQIMHAIGEEGGYVK Y23(Phospho)	568916277	A2ASS6	Ttn	33373	titin isoform X1	-0.28171	0.822615	-1.66994	-1.36285	0.170252	0.205796	N	0.686562	0.132002	0.154612	N	Black	4	5.07243	0.0809713	0.0426867	0.0640918	Y	-1.53466	-1.7759	-1.97209	-1.51907	-1.26903	-1.64942
568916277 DTFTTPGPPYALTVVDVTKR Y10(Phospho)	568916277	A2ASS6	Ttn	15977	titin isoform X1	-0.28615	0.820088	-1.61075	-1.36269	0.182525	0.205844	N	0.686461	0.135364	0.154612	N	Black	4	5.07243	0.0809713	0.0473396	0.0661432	Y	-0.22894	0.0635931	-0.0431505	-0.094819	0.370245	0.374526
568916277 VSAENAAGVGEPSPATVYYK Y18(Phospho)	568916277	A2ASS6	Ttn	25699	titin isoform X1	-0.304443	0.809755	-1.32203	-1.31546	0.256691	0.220627	N	0.656341	0.168402	0.164085	N	Black	4	5.07243	0.0809713	0.0795467	0.0803432	Y	-1.46718	-1.97219	-1.35859	-1.55786	-1.16447	-1.1623
568916277 YGVGDPILTEPAIAK Y1(Phospho)	568916277	A2ASS6	Ttn	21257	titin isoform X1	-0.310206	0.806527	-1.2315	-1.28633	0.285587	0.230181	N	0.63793	0.182003	0.166281	N	Black	4	5.07243	0.0809713	0.0951744	0.0872334	Y	0.77147	0.657398	0.792318	0.592693	1.44633	1.11278
568916277 ACDALYPPGPPSNPK Y6(Phospho)	568916277	A2ASS6	Ttn	26790	titin isoform X1	0.275632	1.21052	1.43764	1.27976	0.223912	0.232385	N	0.633792	0.154316	0.166281	N	Black	4	5.07243	0.0809713	0.0551382	0.0695816	Y	-0.902723	-0.48877	-0.429771	-0.834263	-0.701778	-1.11212
568916277 VTNLQEGAIYYFR Y11(Phospho)	568916277	A2ASS6	Ttn	28137	titin isoform X1	0.273871	1.20905	1.3641	1.25066	0.244247	0.24235	N	0.615556	0.16338	0.167138	N	Black	4	5.07243	0.0809713	0.060463	0.0719293	Y	-0.331019	0.161104	0.256694	-0.103902	-0.234526	-0.396407
568916277 YGVGEPLESESLIAK Y1(Phospho)	568916277	A2ASS6	Ttn	24506	titin isoform X1	-0.259647	0.835292	-1.13059	-1.12324	0.321423	0.290179	N	0.537334	0.191183	0.193102	N	Black	4	5.07243	0.0809713	0.0791124	0.0801517	Y	-0.0520989	0.142957	-0.0148999	-0.147935	0.584767	0.418067
568916277 VENLTEGAIYYFR Y11(Phospho)	568916277	A2ASS6	Ttn	25975	titin isoform X1	-0.218849	0.859251	-1.44523	-1.09029	0.221911	0.303697	N	0.51756	0.154316	0.198613	N	Black	4	5.07243	0.0809713	0.0343959	0.0604364	Y	-0.998605	-0.775903	-0.579775	-0.726879	-0.411635	-0.559223
568916277 IDADIYGKPIPTTQWVK Y6(Phospho)	568916277	A2ASS6	Ttn	24357	titin isoform X1	-0.202276	0.869178	-1.74359	-1.06439	0.156181	0.314658	N	0.502162	0.126858	0.204022	N	Black	4	5.07243	0.0809713	0.0201879	0.0541721	Y	0.884881	0.840355	1.02226	1.17322	1.26116	0.919945
568916277 ATSYTITSLIENQEYK T2(Phospho)	568916277	A2ASS6	Ttn	23603	titin isoform X1	0.207685	1.15483	1.0385	0.949786	0.357689	0.366834	N	0.43553	0.206821	0.22999	N	Black	4	5.07243	0.0809713	0.0599914	0.0717214	Y	-0.458431	0.0433022	-0.141426	-0.538537	-0.121164	-0.519908
568916277 VNWYLNGQLIR Y4(Phospho)	568916277	A2ASS6	Ttn	1881	titin isoform X1	0.224202	1.16813	0.886875	0.928091	0.425252	0.377391	N	0.423208	0.228728	0.234669	N	Black	4	5.07243	0.0809713	0.0958617	0.0875364	Y	0.0513062	0.587114	0.761519	0.326576	0.422707	-0.0219495
568916277 VDQLQEGCSYYFR Y11(Phospho)	568916277	A2ASS6	Ttn	23811	titin isoform X1	-0.206995	0.86634	-0.881635	-0.886792	0.427767	0.398088	N	0.40002	0.228728	0.241598	N	Black	4	5.07243	0.0809713	0.0826866	0.0817276	Y	0.0462415	0.153879	0.428459	0.0390774	0.745529	0.464959
568916277 ANLLANNEYYFR Y10(Phospho)	568916277	A2ASS6	Ttn	19860	titin isoform X1	0.191254	1.14176	0.974187	0.880559	0.385127	0.401281	N	0.396552	0.215384	0.241603	N	Black	4	5.07243	0.0809713	0.0578131	0.0707609	Y	0.222369	0.49875	0.615994	0.160738	0.562447	0.0401669
568916277 KYEVLSQQPFTLDHAPR Y2(Phospho)	568916277	A2ASS6	Ttn	34149	titin isoform X1	0.154001	1.11265	1.11363	0.783718	0.327843	0.453179	N	0.34373	0.191183	0.256561	N	Black	4	5.07243	0.0809713	0.0286852	0.0579186	Y	-0.522685	-0.178341	-0.0894494	-0.400892	-0.356493	-0.495093
568916277 ISGLVEGTMYYFR Y11(Phospho)	568916277	A2ASS6	Ttn	31397	titin isoform X1	0.201873	1.15019	0.674256	0.76463	0.537108	0.463915	N	0.333562	0.26176	0.260693	N	Black	4	5.07243	0.0809713	0.134462	0.104555	Y	-1.25172	-0.936368	-0.285592	-0.957762	-0.910237	-1.2113
568916277 VSAENAAGLSEPSPPSAYQK Y18(Phospho)	568916277	A2ASS6	Ttn	24617	titin isoform X1	-0.203844	0.868234	-0.636282	-0.742197	0.55918	0.476743	N	0.321716	0.268679	0.265055	N	Black	4	5.07243	0.0809713	0.153953	0.113149	Y	-1.112	-1.17015	-0.535467	-1.2118	-0.617817	-0.376467
568916277 IDQLQEGCSYYFR Y11(Phospho)	568916277	A2ASS6	Ttn	24893	titin isoform X1	0.153797	1.11249	0.820732	0.719724	0.457894	0.48982	N	0.309964	0.238781	0.269266	N	Black	4	5.07243	0.0809713	0.0526725	0.0684945	Y	0.263611	0.451174	0.830734	0.194827	0.47724	0.412061
568916277 AWTPVTYTVTR Y7(Phospho)	568916277	A2ASS6	Ttn	18457	titin isoform X1	-0.128234	0.914951	-0.780635	-0.625137	0.478633	0.547281	N	0.26179	0.240149	0.290334	N	Black	4	5.07243	0.0809713	0.0404766	0.0631174	Y	0.616157	0.849453	0.872524	0.623627	1.06841	1.0308
568916277 YGLGVPVESEPIVAR Y1(Phospho)	568916277	A2ASS6	Ttn	31009	titin isoform X1	0.14576	1.10631	0.518998	0.571907	0.631154	0.581276	N	0.235618	0.280721	0.303925	N	Black	4	5.07243	0.0809713	0.118314	0.0974358	Y	-0.850351	-0.276028	-0.202755	-0.900983	-0.238367	-0.627065
568916277 YGISDECK Y1(Phospho)	568916277	A2ASS6	Ttn	17368	titin isoform X1	-0.1134	0.924407	-0.756135	-0.56631	0.491656	0.584917	N	0.232905	0.243082	0.303925	N	Black	4	5.07243	0.0809713	0.0337379	0.0601463	Y	1.28056	1.38877	1.42536	1.22345	1.72016	1.49128
568916277 AVYAQDPLYPPGPPAFPK Y3(Phospho)	568916277	A2ASS6	Ttn	21370	titin isoform X1	0.128613	1.09324	0.51514	0.535592	0.633616	0.605119	N	0.218159	0.280721	0.312283	N	Black	4	5.07243	0.0809713	0.0934993	0.0864949	Y	-0.902139	-0.858933	-0.788931	-1.14397	-0.491921	-1.29995
568916277 DSGYYSLTAENSSGSDTQK Y4(Phospho)	568916277	A2ASS6	Ttn	20757	titin isoform X1	0.100725	1.07231	0.815654	0.52432	0.460481	0.612624	N	0.212806	0.238781	0.313044	N	Black	4	5.07243	0.0809713	0.0228745	0.0553566	Y	-0.783337	-0.738428	-0.496359	-0.92243	-0.771531	-0.626337
568916277 YTVTDLQAGEEYK Y1(Phospho)	568916277	A2ASS6	Ttn	30102	titin isoform X1	0.10059	1.07221	0.534607	0.470079	0.621255	0.649393	N	0.187492	0.278866	0.326254	N	Black	4	5.07243	0.0809713	0.0531049	0.0686851	Y	0.0499487	0.338106	-0.110689	-0.237147	0.22952	-0.0167786
568916277 YGIGEALESEPVIACNPYK Y1(Phospho)	568916277	A2ASS6	Ttn	26671	titin isoform X1	-0.0912211	0.938728	-0.499159	-0.430472	0.643872	0.676898	N	0.169477	0.282544	0.336548	N	Black	4	5.07243	0.0809713	0.0500961	0.0673586	Y	-0.197879	-0.0563403	0.226477	-0.125086	0.331634	0.039373
568916277 NFPSHTVYVR Y8(Phospho)	568916277	A2ASS6	Ttn	28276	titin isoform X1	-0.0769632	0.948051	-0.450394	-0.370912	0.675759	0.719216	N	0.143141	0.289978	0.348205	N	Black	4	5.07243	0.0809713	0.0437997	0.0645825	Y	0.0533044	0.336131	0.536203	0.299499	0.276256	0.580773
568916277 TADQDLVVDAGQPLTMVVPYDAYPK Y23(Phospho)	568916277	A2ASS6	Ttn	14815	titin isoform X1	0.0556333	1.03932	0.302355	0.261944	0.777451	0.799215	N	0.0973365	0.315743	0.365306	N	Black	4	5.07243	0.0809713	0.0507839	0.0676618	Y	-1.27288	-1.39014	-1.24959	-1.68262	-1.33168	-1.06521
568916277 LSWTQVSNEVQALNYK Y15(Phospho)	568916277	A2ASS6	Ttn	26650	titin isoform X1	0.0516111	1.03642	0.185524	0.203531	0.861846	0.843212	N	0.0740633	0.342816	0.376281	N	Black	4	5.07243	0.0809713	0.116085	0.0964529	Y	-0.536865	-0.0794591	-0.0355627	-0.402762	0.174395	-0.578353
568916277 VTNLQEGAIYYFR Y10(Phospho)	568916277	A2ASS6	Ttn	28136	titin isoform X1	-0.0350097	0.976025	-0.306401	-0.184679	0.774586	0.857543	N	0.0667438	0.315743	0.378437	N	Black	4	5.07243	0.0809713	0.0195834	0.0539056	Y	-0.949695	-0.825261	-0.751528	-0.860345	-0.616199	-0.944911
568916277 YGIGEPLESEPVVAK Y1(Phospho)	568916277	A2ASS6	Ttn	28835	titin isoform X1	-0.049086	0.966548	-0.135759	-0.165639	0.898569	0.872073	N	0.059447	0.347923	0.382412	N	Black	4	5.07243	0.0809713	0.196095	0.131729	Y	-0.18416	0.459985	0.59015	-0.2042	0.611597	0.605836
568916277 LLERPPEFTLPLYNK Y13(Phospho)	568916277	A2ASS6	Ttn	33485	titin isoform X1	-0.023635	0.983751	-0.17547	-0.120959	0.869235	0.90636	N	0.0426992	0.342816	0.390672	N	Black	4	5.07243	0.0809713	0.0272142	0.05727	Y	0.0715839	0.149426	0.151092	-0.00831905	0.410366	0.04096
568916277 LVEGGSVVFECQIGGNPKPHVYWK Y22(Phospho)	568916277	A2ASS6	Ttn	1116	titin isoform X1	0.0234593	1.01639	0.130351	0.111256	0.902581	0.913836	N	0.039132	0.347923	0.391297	N	Black	4	5.07243	0.0809713	0.0485838	0.0666918	Y	-0.408125	-0.282364	-0.782268	-0.572845	-0.320869	-0.649421
568916277 VTAENEYGIGLPAR Y7(Phospho)	568916277	A2ASS6	Ttn	24902	titin isoform X1	0.0151447	1.01055	0.116178	0.0780268	0.913111	0.939501	N	0.027103	0.350004	0.391607	N	Black	4	5.07243	0.0809713	0.0254898	0.0565097	Y	0.0208581	0.00342903	0.341475	-0.0273819	0.138473	0.209237
568987488 NPGNQAAYEHFETMK Y8(Phospho)	568987488	Q64727	Vcl	692	vinculin, isoform CRA_b;;vinculin isoform X1	0.329057	1.25619	1.11543	1.2568	0.327154	0.24022	N	0.61939	0.191183	0.167138	N	Black	4	5.07243	0.0809713	0.13054	0.102826	Y	-0.700081	-1.21648	-0.972092	-0.789163	-1.61233	-1.47433
326806986 LIEDNEYTAR Y7(Phospho)	326806986	Q04736	Yes1	424	Tyrosine-protein kinase Yes (EC 2.7.10.2) (Proto-oncogene c-Yes) (p61-Yes)	-0.748657	0.595157	-1.22407	-1.69491	0.288092	0.124064	N	0.906355	0.182003	0.120663	N	Black	4	5.07243	0.0809713	0.561105	0.29266	N	1.06857	-0.793091	-0.631693	0.858974	0.377289	0.653493
