# Supplementary material for: Altered Tyrosine Phosphorylation of Cardiac Proteins Prompts Contractile Dysfunction in Hypertrophic Cardiomyopathy
Source: Research Square preprint supplement (doi:10.21203/rs.3.rs-100810/v1), 2020-11-12
Supplement: Supplementary file 3 [file b5de59fcd5ff48a0b110fdfd.xlsx]

## Sheet: Sheet1
Protein	Gene Symbol	Uniprot Acc ID	Leading proteins	Protein	Proteins	Sequence window	Phospho (STY) Probabilities	Amino-acid	Position in Sequence window	Positions within proteins	Site (Uniprot)	Log2 Intensity TgErbB2_rep1	Log2 Intensity TgErbB2_rep2	Log2 Intensity TgErbB2_rep3	Log2 Intensity R403Q-aMyHC_rep1	Log2 Intensity R403Q-aMyHC_rep2	Log2 Intensity Ntg_rep1	Log2 Intensity Ntg_rep2	Log2 Intensity Ntg_rep3	Localization prob	PEP	Score	Delta score	Score for localization	Mass error [ppm]	Intensity
Uncharacterized protein CXorf49 homolog	4933412E24Rik	Q9D454	gi|223468697|ref|NP_081944.1|	gi|223468697|ref|NP_081944.1|	gi|223468697|ref|NP_081944.1|	NLYTGKRSGAK	NLY(0.712)T(0.144)GKRS(0.144)GAK	Y	3	373	373	-1.06089	NaN	NaN	2.65097	-0.00962436	NaN	NaN	NaN	0.7124	0.00943311	41.704	11.961	41.704	0.90235	6345100
Tyrosine-protein kinase ABL1	Abl1	P00520	gi|568912812|ref|XP_006497684.1|	gi|568912812|ref|XP_006497684.1|	gi|568912812|ref|XP_006497684.1|;gi|545687676|ref|NP_001269976.1|;gi|568910398|ref|XP_006496685.1|;gi|568910396|ref|XP_006496684.1|;gi|568910394|ref|XP_006496683.1|;gi|755495391|ref|XP_011237040.1|;gi|209870055|ref|NP_001129576.1|;gi|545687805|ref|NP_001269975.1|;gi|545687252|ref|NP_001269974.1|;gi|162951865|ref|NP_033724.2|;gi|162951870|ref|NP_001106174.1|;gi|568910388|ref|XP_006496680.1|;gi|568…	LMTGDTYTAHAGAK	LMT(0.001)GDT(0.035)Y(0.929)T(0.035)AHAGAK	Y	7	412;157;403;418;424;439;439;387;388;393;412;403;418;418;424;424;439;439	393	-0.151767	0.801147	-0.103088	-0.294659	NaN	NaN	0.851918	NaN	0.928815	0.000139133	61.11	47.71	61.11	0.2044	7062200
Actin-binding LIM protein 1	Ablim1	Q8K4G5	gi|1039757715|ref|XP_017173669.1|	gi|1039757715|ref|XP_017173669.1|	gi|1039757715|ref|XP_017173669.1|;gi|595763156|ref|NP_001277744.1|;gi|1039757712|ref|XP_017173668.1|;gi|569007153|ref|XP_006527103.1|;gi|157057174|ref|NP_001096647.1|;gi|1039757705|ref|XP_017173666.1|;gi|569007147|ref|XP_006527100.1|;gi|595763419|ref|NP_001277742.1|;gi|569007145|ref|XP_006527099.1|;gi|569007143|ref|XP_006527098.1|;gi|569007141|ref|XP_006527097.1|;gi|569007139|ref|XP_006527096.1|;…	HFHVPDQGINIYR	HFHVPDQGINIY(1)R	Y	12	445;446;459;487;446;499;459;522;527;487;487;499;509;513;514;518;527;527;606;246;274;274;290	606	0.144196	NaN	NaN	NaN	-1.15815	0.560935	0.40815	0.200929	1	2.16e-05	95.477	89.201	50.149	-0.71012	3840600
Actin-binding LIM protein 1	Ablim1	Q8K4G5	gi|1039757715|ref|XP_017173669.1|;gi|1039757717|ref|XP_017173670.1|	gi|1039757715|ref|XP_017173669.1|	gi|1039757715|ref|XP_017173669.1|;gi|595763156|ref|NP_001277744.1|;gi|1039757712|ref|XP_017173668.1|;gi|569007153|ref|XP_006527103.1|;gi|157057174|ref|NP_001096647.1|;gi|1039757705|ref|XP_017173666.1|;gi|569007147|ref|XP_006527100.1|;gi|595763419|ref|NP_001277742.1|;gi|569007145|ref|XP_006527099.1|;gi|569007143|ref|XP_006527098.1|;gi|569007141|ref|XP_006527097.1|;gi|569007139|ref|XP_006527096.1|;…	TSSESIYSRPGSSIPGSPGHTIYAK	TSSESIYSRPGSSIPGS(0.004)PGHT(0.052)IY(0.944)AK	Y	23	296;297;310;338;297;310;310;373;338;338;338;310;320;324;325;329;338;338;417;57;85;85;101;310;338;297;310;310;338;338;57;57;57	417	-0.557074	0.0302548	-0.368108	1.52129	2.95879	0.594239	NaN	-0.153248	0.944089	5.1e-08	79.69	74.337	79.69	0.99127	12931000
Actin-binding LIM protein 1	Ablim1	Q8K4G5	gi|1039757717|ref|XP_017173670.1|	gi|1039757717|ref|XP_017173670.1|	gi|1039757717|ref|XP_017173670.1|;gi|569007161|ref|XP_006527107.1|;gi|595763507|ref|NP_001277745.1|;gi|1039757710|ref|XP_017173667.1|;gi|569007155|ref|XP_006527104.1|;gi|569007151|ref|XP_006527102.1|;gi|569007149|ref|XP_006527101.1|;gi|1039757728|ref|XP_017173675.1|;gi|1039757726|ref|XP_017173674.1|;gi|1039757724|ref|XP_017173673.1|	SPQHFHRPDQGINIYR	SPQHFHRPDQGINIY(1)R	Y	15	424;452;411;424;424;452;452;171;171;171	NA	NaN	-0.151658	-0.545848	0.116685	NaN	0.164629	NaN	0.927612	0.999981	0.000148967	48.405	37.79	48.405	-0.20068	1651800
Actin, alpha cardiac muscle 1	Actc1	P68033	gi|14192922|ref|NP_033738.1|;gi|30425250|ref|NP_780706.1|;gi|439253893|ref|NP_001258970.1|;gi|6671507|ref|NP_031418.1|;gi|6752954|ref|NP_033739.1|	gi|14192922|ref|NP_033738.1|	gi|14192922|ref|NP_033738.1|;gi|30425250|ref|NP_780706.1|;gi|439253893|ref|NP_001258970.1|;gi|33563240|ref|NP_033736.1|;gi|6671507|ref|NP_031418.1|;gi|157823889|ref|NP_033740.2|;gi|569006251|ref|XP_006526669.1|;gi|6752954|ref|NP_033739.1|;gi|6671509|ref|NP_031419.1|;gi|927028891|ref|NP_001300852.1|	DLTDYLMK	DLT(0.002)DY(0.998)LMK	Y	5	190;189;190;190;190;189;190;188;188;66	190	0.0852911	NaN	-0.45401	-0.408373	0.771311	NaN	0.124497	NaN	0.997725	0.00333385	71.501	7.9361	71.501	-0.20559	5020200
Actin, alpha cardiac muscle 1	Actc1	P68033	gi|14192922|ref|NP_033738.1|;gi|439253893|ref|NP_001258970.1|;gi|6671507|ref|NP_031418.1|;gi|6752954|ref|NP_033739.1|	gi|14192922|ref|NP_033738.1|	gi|14192922|ref|NP_033738.1|;gi|439253893|ref|NP_001258970.1|;gi|33563240|ref|NP_033736.1|;gi|6671507|ref|NP_031418.1|;gi|157823889|ref|NP_033740.2|;gi|569006251|ref|XP_006526669.1|;gi|6752954|ref|NP_033739.1|;gi|6671509|ref|NP_031419.1|	DSYVGDEAQSKR	DSY(1)VGDEAQSKR	Y	3	55;55;55;55;54;55;53;53	55	-0.229152	0.0429418	-1.47971	-0.680426	0.793901	1.13942	-0.23304	0.19702	0.999896	2.07e-53	214.04	184.97	214.04	-0.29875	51163000
Actin, alpha cardiac muscle 1	Actc1	P68033	gi|14192922|ref|NP_033738.1|;gi|439253893|ref|NP_001258970.1|;gi|6671507|ref|NP_031418.1|	gi|14192922|ref|NP_033738.1|	gi|14192922|ref|NP_033738.1|;gi|439253893|ref|NP_001258970.1|;gi|33563240|ref|NP_033736.1|;gi|6671507|ref|NP_031418.1|;gi|157823889|ref|NP_033740.2|;gi|569006251|ref|XP_006526669.1|	GYSFVTTAER	GY(1)SFVTTAER	Y	2	200;200;200;200;199;200	200	-0.391185	-0.225266	-0.0610686	1.47231	1.81843	0.441759	0.645926	0.313848	0.99999	1.02e-17	172.98	121.91	172.98	0.25071	34926000
Actin, alpha cardiac muscle 1	Actc1	P68033	gi|14192922|ref|NP_033738.1|;gi|439253893|ref|NP_001258970.1|;gi|6752954|ref|NP_033739.1|	gi|14192922|ref|NP_033738.1|	gi|14192922|ref|NP_033738.1|;gi|439253893|ref|NP_001258970.1|;gi|33563240|ref|NP_033736.1|;gi|6752954|ref|NP_033739.1|;gi|6671509|ref|NP_031419.1|	IWHHTFYNELR	IWHHTFY(1)NELR	Y	7	93;93;93;91;91	93	-0.198045	-0.120313	-0.305588	1.51762	0.0415968	NaN	1.93583	-0.153949	0.999965	5.04e-17	164.64	149.1	164.64	0.84442	59003000
Actin, alpha cardiac muscle 1	Actc1	P68033	gi|14192922|ref|NP_033738.1|;gi|30425250|ref|NP_780706.1|;gi|439253893|ref|NP_001258970.1|;gi|6671507|ref|NP_031418.1|;gi|6752954|ref|NP_033739.1|	gi|14192922|ref|NP_033738.1|	gi|14192922|ref|NP_033738.1|;gi|30425250|ref|NP_780706.1|;gi|439253893|ref|NP_001258970.1|;gi|33563240|ref|NP_033736.1|;gi|6671507|ref|NP_031418.1|;gi|157823889|ref|NP_033740.2|;gi|569006251|ref|XP_006526669.1|;gi|6752954|ref|NP_033739.1|;gi|6671509|ref|NP_031419.1|;gi|927028891|ref|NP_001300852.1|	SYELPDGQVITIGNER	S(0.146)Y(0.854)ELPDGQVITIGNER	Y	2	242;241;242;242;242;241;242;240;240;118	242	-0.263892	0.403048	NaN	NaN	1.07598	0.741104	NaN	NaN	0.854477	9.63e-05	84.508	76.383	84.508	0.0048742	11187000
Actin, alpha cardiac muscle 1	Actc1	P68033	gi|14192922|ref|NP_033738.1|;gi|439253893|ref|NP_001258970.1|;gi|6671507|ref|NP_031418.1|	gi|14192922|ref|NP_033738.1|	gi|14192922|ref|NP_033738.1|;gi|439253893|ref|NP_001258970.1|;gi|33563240|ref|NP_033736.1|;gi|6671507|ref|NP_031418.1|;gi|157823889|ref|NP_033740.2|;gi|569006251|ref|XP_006526669.1|	TTGIVLDSGDGVTHNVPIYEGYALPHAIMR	TTGIVLDS(0.068)GDGVT(0.068)HNVPIY(0.796)EGY(0.068)ALPHAIMR	Y	19	168;168;168;168;167;168	168	0.492606	-0.113323	-0.225955	-1.44521	NaN	NaN	NaN	0.478055	0.795831	3.39e-10	56.172	55.575	56.172	-0.14902	19342000
Alpha-actinin-2	Actn2	Q9JI91	gi|157951643|ref|NP_150371.4|	gi|157951643|ref|NP_150371.4|	gi|157951643|ref|NP_150371.4|	HRPDLIDYSK	HRPDLIDY(0.996)S(0.004)K	Y	8	200	200	NaN	0.37798	-0.240359	-0.826923	NaN	-0.316838	-0.589773	NaN	0.995736	0.000740178	69.721	59.412	62.466	0.38185	2567600
Alpha-actinin-2	Actn2	Q9JI91	gi|157951643|ref|NP_150371.4|	gi|157951643|ref|NP_150371.4|	gi|157951643|ref|NP_150371.4|;gi|755544053|ref|XP_011242565.1|	VIQSYSIR	VIQS(0.017)Y(0.966)S(0.017)IR	Y	5	589;331	589	-0.6525	0.151805	0.130088	1.09516	NaN	-0.300286	0.478606	NaN	0.965745	0.00254854	79.474	33.048	79.474	0.31333	3543500
Alpha-actinin-4	Actn4	P57780	gi|568946338|ref|XP_006540318.1|;gi|157951643|ref|NP_150371.4|	gi|157951643|ref|NP_150371.4|	gi|568946338|ref|XP_006540318.1|;gi|11230802|ref|NP_068695.1|;gi|568946342|ref|XP_006540320.1|;gi|568946340|ref|XP_006540319.1|;gi|568946336|ref|XP_006540317.1|;gi|157951643|ref|NP_150371.4|;gi|755544053|ref|XP_011242565.1|	HTNYTMEHIR	HT(0.009)NY(0.943)T(0.048)MEHIR	Y	4	728;728;728;728;728;715;457	728	NaN	NaN	NaN	NaN	-0.00962436	NaN	NaN	NaN	0.943242	0.00481705	46.844	35.679	46.844	-0.81483	340230
Actin filament-associated protein 1-like 1	Afap1l1	Q8BZI0	gi|31982370|ref|NP_849259.2|	gi|31982370|ref|NP_849259.2|	gi|31982370|ref|NP_849259.2|	CNTLYFHKDR	CNT(0.006)LY(0.994)FHKDR	Y	5	446	446	-0.240393	0.208619	NaN	NaN	NaN	-0.512047	-0.326799	-1.70287	0.994103	0.00647144	41.399	32.699	41.399	-0.0092008	739720
Actin filament-associated protein 1-like 1	Afap1l1	Q8BZI0	gi|31982370|ref|NP_849259.2|	gi|31982370|ref|NP_849259.2|	gi|31982370|ref|NP_849259.2|	IYDEVPYEK	IY(1)DEVPYEK	Y	2	557	557	-2.35661	NaN	NaN	-0.545886	0.0903736	NaN	-1.37595	NaN	0.999998	0.000665611	86.898	58.724	82.645	0.67263	2209500
Actin filament-associated protein 1-like 2	Afap1l2	Q5DTU0	gi|22122607|ref|NP_666214.1|	gi|22122607|ref|NP_666214.1|	gi|22122607|ref|NP_666214.1|;gi|1039757686|ref|XP_017173660.1|;gi|295317359|ref|NP_001171268.1|;gi|295317357|ref|NP_001171267.1|;gi|1039757684|ref|XP_017173659.1|;gi|569007121|ref|XP_006527087.1|;gi|1039757682|ref|XP_017173658.1|;gi|1039757680|ref|XP_017173657.1|	SKVAQQPLSLVGCDVLPDPSPDHLYSFR	SKVAQQPLSLVGCDVLPDPS(0.002)PDHLY(0.753)S(0.245)FR	Y	25	357;385;413;431;431;459;441;459	413	0.460485	NaN	NaN	NaN	NaN	NaN	NaN	-0.154218	0.752931	8e-11	66.36	65.065	66.36	0.22722	65436000
Fructose-bisphosphate aldolase A	Aldoa	P05064	gi|6671539|ref|NP_031464.1|	gi|6671539|ref|NP_031464.1|	gi|6671539|ref|NP_031464.1|;gi|568949352|ref|XP_006507274.1|;gi|568949350|ref|XP_006507273.1|;gi|293597569|ref|NP_001170779.1|;gi|568949348|ref|XP_006507272.1|;gi|293597567|ref|NP_001170778.1|	PHPYPALTPEQK	PHPY(0.999)PALT(0.001)PEQK	Y	4	5;5;5;5;59;59	5	NaN	NaN	NaN	-1.44521	NaN	NaN	NaN	NaN	0.998876	0.000191538	76.332	65.561	76.332	0.28054	1184800
Annexin A2	Anxa2	P07356	gi|6996913|ref|NP_031611.1|	gi|6996913|ref|NP_031611.1|	gi|6996913|ref|NP_031611.1|;gi|568960713|ref|XP_006510859.1|	LSLEGDHSTPPSAYGSVKPYTNFDAER	LSLEGDHSTPPS(0.015)AY(0.914)GS(0.064)VKPY(0.006)T(0.001)NFDAER	Y	14	24;24	24	NaN	-0.166713	-0.262968	NaN	1.77365	NaN	NaN	NaN	0.914218	2.85e-11	78.098	71.872	69.845	-0.35211	13964000
Annexin A5	Anxa5	P48036	gi|6753060|ref|NP_033803.1|	gi|6753060|ref|NP_033803.1|	gi|6753060|ref|NP_033803.1|	LYDAYELK	LYDAY(1)ELK	Y	5	92	92	0.483914	NaN	NaN	-0.380282	-1.21324	-0.363121	0.141555	-0.630293	0.999897	0.000890217	65.465	12.529	65.465	0.20353	2866700
Annexin	Anxa6	Q99JX6	gi|158966670|ref|NP_001103681.1|	gi|158966670|ref|NP_001103681.1|	gi|158966670|ref|NP_001103681.1|;gi|31981302|ref|NP_038500.2|	NKPLFFADKLYK	NKPLFFADKLY(1)K	Y	11	603;609	NA	-0.697081	-1.16201	-1.28056	0.30843	0.313816	-0.28614	0.488247	-0.154218	1	0.000159834	79.492	75.378	64.121	-0.46276	4159300
Annexin	Anxa6	Q99JX6	gi|158966670|ref|NP_001103681.1|	gi|158966670|ref|NP_001103681.1|	gi|158966670|ref|NP_001103681.1|;gi|31981302|ref|NP_038500.2|	SLYSMIK	S(0.002)LY(0.992)S(0.006)MIK	Y	3	302;302	302	-0.308666	-0.800862	0.604699	0.380958	0.220806	0.000155464	0.281404	0.692693	0.991968	0.00623407	73.324	20.161	65.252	-0.037312	2107900
Rho GTPase-activating protein 27	Arhgap27	A2AB59	gi|327412300|ref|NP_001192165.1|	gi|327412300|ref|NP_001192165.1|	gi|327412300|ref|NP_001192165.1|	QVDDPPEPVYANVER	QVDDPPEPVY(1)ANVER	Y	10	227	227	0.048982	-0.468079	-0.18723	0.217751	0.0796933	-0.0558636	0.855586	0.172412	1	0.000104566	70.449	64.333	62.287	0.56347	12128000
Rho GTPase-activating protein 35	Arhgap35	Q91YM2	gi|75677442|ref|NP_766327.3|	gi|75677442|ref|NP_766327.3|	gi|75677442|ref|NP_766327.3|;gi|755519400|ref|XP_011248814.1|;gi|568945410|ref|XP_006539872.1|	NEEENIYSVPHDSTQGK	NEEENIY(0.975)S(0.025)VPHDSTQGK	Y	7	1105;1105;1105	1105	-0.161501	0.775397	0.149159	-1.33216	NaN	-1.0895	0.0537329	0.273404	0.975182	2.87e-06	123.29	109.87	123.29	-0.55613	41815000
Rho GTPase-activating protein 42	Arhgap42	B2RQE8	gi|198278482|ref|NP_082099.1|	gi|198278482|ref|NP_082099.1|	gi|198278482|ref|NP_082099.1|;gi|568958574|ref|XP_006509947.1|	LDTASSNGYQRPGSVVAAK	LDTAS(0.002)S(0.008)NGY(0.929)QRPGS(0.061)VVAAK	Y	9	759;793	759	NaN	NaN	0.741462	3.10837	NaN	0.534284	0.704914	-0.154218	0.928957	2.74e-05	66.826	58.277	66.826	-0.2852	9253500
Rho guanine nucleotide exchange factor 10-like protein	Arhgef10l	A2AWP8	gi|755510059|ref|XP_011248642.1|	gi|755510059|ref|XP_011248642.1|	gi|755510059|ref|XP_011248642.1|;gi|163310757|ref|NP_001106194.1|;gi|163310755|ref|NP_001106193.1|;gi|163310759|ref|NP_766003.3|;gi|755510052|ref|XP_011248639.1|;gi|595763218|ref|NP_001277732.1|;gi|568931946|ref|XP_006539265.1|;gi|568931944|ref|XP_006539264.1|;gi|1039768743|ref|XP_017175885.1|	GLVYEDVHR	GLVY(1)EDVHR	Y	4	152;152;152;152;152;152;152;152;152	152	NaN	NaN	NaN	-0.497064	NaN	NaN	NaN	NaN	1	0.000807368	83.783	59.007	83.783	0.16549	589620
Bifunctional purine biosynthesis protein ATIC	Atic	Q9CWJ9	gi|227908823|ref|NP_080471.2|	gi|227908823|ref|NP_080471.2|	gi|227908823|ref|NP_080471.2|	YGMNPHQTPAQLYTLKPK	Y(1)GMNPHQTPAQLYTLKPK	Y	1	208	208	NaN	NaN	NaN	-1.44521	NaN	NaN	NaN	NaN	0.99979	7.94e-05	69.935	66.263	69.935	1.5951	1773000
Sodium/potassium-transporting ATPase subunit alpha-1	Atp1a1	Q8VDN2	gi|21450277|ref|NP_659149.1|	gi|21450277|ref|NP_659149.1|	gi|21450277|ref|NP_659149.1|	YHTEIVFAR	Y(1)HTEIVFAR	Y	1	684	684	0.144196	0.251707	0.572295	NaN	-0.586465	NaN	0.53389	1.60262	1	2.34e-44	205.12	173.24	205.12	-0.019698	45028000
Sodium/potassium-transporting ATPase subunit alpha-1	Atp1a1	Q8VDN2	gi|21450277|ref|NP_659149.1|	gi|21450277|ref|NP_659149.1|	gi|21450277|ref|NP_659149.1|	GIVVYTGDR	GIVVY(0.998)T(0.002)GDR	Y	5	260	260	0.275865	-0.558995	NaN	NaN	NaN	0.365593	0.0307947	0.388315	0.998301	0.000799865	83.948	50.685	83.948	-0.21886	2479100
Sarcoplasmic/endoplasmic reticulum calcium ATPase 2	Atp2a2	O55143	gi|6806903|ref|NP_033852.1|	gi|6806903|ref|NP_033852.1|	gi|6806903|ref|NP_033852.1|;gi|158635979|ref|NP_001103610.1|	SMSVYCTPNKPSR	SMS(0.002)VY(0.998)CTPNKPSR	Y	5	497;497	497	-1.01532	-1.38706	-1.72926	1.80304	1.62808	0.944083	0.0546055	-0.154218	0.997554	2.1e-09	97.69	93.592	77.894	-0.27217	18404000
Sarcoplasmic/endoplasmic reticulum calcium ATPase 2	Atp2a2	O55143	gi|6806903|ref|NP_033852.1|	gi|6806903|ref|NP_033852.1|	gi|6806903|ref|NP_033852.1|;gi|158635979|ref|NP_001103610.1|	VSFYQLSHFLQCK	VS(0.007)FY(0.984)QLS(0.009)HFLQCK	Y	4	867;867	867	0.181205	NaN	NaN	NaN	-0.0476078	NaN	-0.0146977	NaN	0.984331	0.000274279	61.11	52.544	61.11	-0.8458	1440700
ATP synthase subunit gamma	Atp5c1	Q8C2Q8	gi|163838648|ref|NP_001106209.1|;gi|568912066|ref|XP_006497373.1|	gi|163838648|ref|NP_001106209.1|	gi|163838648|ref|NP_001106209.1|;gi|163838641|ref|NP_065640.2|;gi|568912066|ref|XP_006497373.1|	IKGILYR	IKGILY(1)R	Y	6	118;142;142	118	0.250047	-0.23428	0.256134	1.16852	NaN	NaN	0.143912	0.178834	1	0.0175045	40.103	8.8137	40.103	0.063822	1272100
Atp5f1 protein	Atp5f1	Q80W36	gi|754170607|ref|NP_001291648.1|	gi|754170607|ref|NP_001291648.1|	gi|754170607|ref|NP_001291648.1|;gi|78214312|ref|NP_033855.2|	RHYLFDVQR	RHY(1)LFDVQR	Y	3	140;165	NA	-0.477589	-0.120043	0.448758	0.309362	0.905034	-0.349851	-0.412852	-0.85094	1	1.29e-05	147.36	125.13	53.756	-0.49766	15989000
ATP synthase subunit d, mitochondrial	Atp5h	Q9DCX2	gi|568975897|ref|XP_006534317.1|	gi|568975897|ref|XP_006534317.1|	gi|568975897|ref|XP_006534317.1|;gi|21313679|ref|NP_082138.1|	LASLSEKPPAIDWAYYR	LASLSEKPPAIDWAY(0.5)Y(0.5)R	Y	15	56;56	56	NaN	NaN	-0.005635	NaN	NaN	NaN	0.203342	0.403667	0.499973	0.000109929	48.216	40.092	48.216	-2.6677	4288600
ATP synthase subunit d, mitochondrial	Atp5h	Q9DCX2	gi|568975897|ref|XP_006534317.1|	gi|568975897|ref|XP_006534317.1|	gi|568975897|ref|XP_006534317.1|;gi|21313679|ref|NP_082138.1|	LASLSEKPPAIDWAYYR	LASLSEKPPAIDWAY(0.5)Y(0.5)R	Y	16	57;57	57	NaN	NaN	-0.005635	NaN	NaN	NaN	0.203342	0.403667	0.499973	0.000109929	48.216	40.092	48.216	-2.6677	4288600
ATP synthase subunit e, mitochondrial	Atp5k	Q5EBI8	gi|83715998|ref|NP_031533.2|	gi|83715998|ref|NP_031533.2|	gi|83715998|ref|NP_031533.2|	YSYLKPR	YS(0.003)Y(0.997)LKPR	Y	3	32	32	-0.678607	1.16524	-0.327555	1.17108	2.8971	1.01002	0.149612	-0.154218	0.996805	0.000363109	149.4	99.809	149.4	0.023699	108860000
ATP synthase subunit g, mitochondrial	Atp5l	Q9CPQ8	gi|31980744|ref|NP_038823.2|	gi|31980744|ref|NP_038823.2|	gi|31980744|ref|NP_038823.2|	LATFWHYAK	LAT(0.001)FWHY(0.999)AK	Y	7	33	33	NaN	NaN	NaN	-0.801259	-1.20262	NaN	NaN	NaN	0.999482	0.0162889	43.083	31.515	43.083	-2.0401	922500
ATP synthase subunit O, mitochondrial (Fragment)	Atp5o	F6XVM5	gi|20070412|ref|NP_613063.1|	gi|20070412|ref|NP_613063.1|	gi|20070412|ref|NP_613063.1|	LVRPPVQVYGIEGR	LVRPPVQVY(1)GIEGR	Y	9	35	32	0.0900116	0.273886	NaN	NaN	NaN	NaN	0.272434	-0.101995	1	0.000842369	42.317	38.999	42.317	-0.65045	2223300
Tyrosine-protein kinase receptor UFO	Axl	Q00993	gi|568945792|ref|XP_006540056.1|	gi|568945792|ref|XP_006540056.1|	gi|568945792|ref|XP_006540056.1|;gi|568945790|ref|XP_006540055.1|;gi|300794884|ref|NP_001177904.1|;gi|568945788|ref|XP_006540054.1|;gi|300794860|ref|NP_001177903.1|;gi|568945784|ref|XP_006540052.1|;gi|31542164|ref|NP_033491.2|	IYNGDYYR	IYNGDY(0.5)Y(0.5)R	Y	6	590;599;599;687;687;696;696	696	0.388839	0.811577	0.599671	NaN	NaN	-0.459196	NaN	0.993194	0.499985	0.0052535	61.962	44.143	61.962	-0.4416	762180
Tyrosine-protein kinase receptor UFO	Axl	Q00993	gi|568945792|ref|XP_006540056.1|	gi|568945792|ref|XP_006540056.1|	gi|568945792|ref|XP_006540056.1|;gi|568945790|ref|XP_006540055.1|;gi|300794884|ref|NP_001177904.1|;gi|568945788|ref|XP_006540054.1|;gi|300794860|ref|NP_001177903.1|;gi|568945784|ref|XP_006540052.1|;gi|31542164|ref|NP_033491.2|	IYNGDYYR	IYNGDY(0.5)Y(0.5)R	Y	7	591;600;600;688;688;697;697	697	0.388839	0.811577	0.599671	NaN	NaN	-0.459196	NaN	0.993194	0.499985	0.0052535	61.962	44.143	61.962	-0.4416	762180
Tyrosine-protein kinase receptor UFO	Axl	Q00993	gi|568945792|ref|XP_006540056.1|	gi|568945792|ref|XP_006540056.1|	gi|568945792|ref|XP_006540056.1|;gi|568945790|ref|XP_006540055.1|;gi|300794884|ref|NP_001177904.1|;gi|568945788|ref|XP_006540054.1|;gi|300794860|ref|NP_001177903.1|;gi|568945784|ref|XP_006540052.1|;gi|31542164|ref|NP_033491.2|	YVLCPSTAPGPTLSADR	Y(1)VLCPSTAPGPTLSADR	Y	1	754;763;763;851;851;860;860	860	NaN	NaN	NaN	-1.44521	NaN	NaN	NaN	NaN	0.999866	9.91e-05	63.682	56.909	63.682	-0.21866	1644800
Bisphosphoglycerate mutase	Bpgm	P15327	gi|6680806|ref|NP_031589.1|	gi|6680806|ref|NP_031589.1|	gi|6680806|ref|NP_031589.1|	HYGALIGLNR	HY(1)GALIGLNR	Y	2	92	92	0.269234	NaN	0.720152	NaN	NaN	NaN	0.252222	-0.154218	1	0.00141901	63.816	38.195	63.816	-1.2136	591580
Carbonic anhydrase 2 (Fragment)	Car2	A0A0A6YX78	gi|568920559|ref|XP_006530113.1|	gi|568920559|ref|XP_006530113.1|	gi|568920559|ref|XP_006530113.1|;gi|157951596|ref|NP_033931.4|	YAAELHLVHWNTK	Y(1)AAELHLVHWNTK	Y	1	114;114	NA	NaN	NaN	NaN	-0.788097	-1.25065	NaN	NaN	NaN	0.999992	0.000493945	54.343	42.76	54.343	-0.6577	1435400
ATP-dependent (S)-NAD(P)H-hydrate dehydratase	Carkd	Q9CZ42	gi|652698252|ref|NP_001280590.1|	gi|652698252|ref|NP_001280590.1|	gi|652698252|ref|NP_001280590.1|;gi|568953476|ref|XP_006508935.1|;gi|298676452|ref|NP_001177286.1|;gi|298676450|ref|NP_081271.2|	IGIVGGCQEYTGAPYFAGISALK	IGIVGGCQEY(0.928)T(0.067)GAPY(0.006)FAGISALK	Y	10	65;103;65;103	81	0.24196	-0.120043	0.0845825	-1.36843	-1.16292	NaN	-0.487788	NaN	0.927658	1.97e-07	76.21	71.201	56.29	0.40117	521510000
Caskin-2	Caskin2	Q8VHK1	gi|755537312|ref|XP_011247021.1|	gi|755537312|ref|XP_011247021.1|	gi|755537312|ref|XP_011247021.1|;gi|755537310|ref|XP_011247020.1|;gi|568971565|ref|XP_006532244.1|;gi|31981530|ref|NP_542374.2|	NTYNQTALDIVNQFTTSQASR	NT(0.003)Y(0.992)NQT(0.005)ALDIVNQFTTSQASR	Y	3	121;171;232;253	253	NaN	0.344104	0.132235	NaN	-0.00962436	NaN	NaN	0.0333712	0.991679	1.9e-05	64.522	57.423	64.522	0.79367	7244000
Calsequestrin-2	Casq2	O09161	gi|157951700|ref|NP_033944.2|	gi|157951700|ref|NP_033944.2|	gi|157951700|ref|NP_033944.2|;gi|568921685|ref|XP_006501010.1|	SDPDGYEFLEILK	SDPDGY(1)EFLEILK	Y	6	282;299	282	-0.503991	-0.120043	0.640491	-0.164858	-0.10962	0.972058	-0.0694562	0.758392	0.999851	0.000258946	63.185	47.641	63.185	0.32398	60775000
Caveolin-1	Cav1	P49817	gi|6680854|ref|NP_031642.1|	gi|6680854|ref|NP_031642.1|	gi|6680854|ref|NP_031642.1|;gi|568939395|ref|XP_006505037.1|	YVDSEGHLYTVPIR	YVDS(0.006)EGHLY(0.794)T(0.201)VPIR	Y	9	14;14	14	0.057042	-0.251507	0.747562	1.62202	2.58348	-0.0751593	0.215892	-0.0720307	0.793597	3.59e-06	117.08	106.73	70.089	0.45903	24418000
Cadherin-2	Cdh2	P15116	gi|569003077|ref|XP_006525616.1|	gi|569003077|ref|XP_006525616.1|	gi|569003077|ref|XP_006525616.1|;gi|161760627|ref|NP_031690.3|	LDERPIHAEPQYPVR	LDERPIHAEPQY(1)PVR	Y	12	783;820	820	NaN	-0.120043	NaN	-0.189759	NaN	NaN	-0.180244	NaN	1	7.91e-05	75.764	67.422	75.764	-0.31361	2506400
Cyclin-dependent kinase 1	Cdk1	P11440	gi|31542366|ref|NP_031685.2|	gi|31542366|ref|NP_031685.2|	gi|31542366|ref|NP_031685.2|;gi|7949020|ref|NP_058036.1|;gi|34556205|ref|NP_904326.1|	IGEGTYGVVYK	IGEGT(1)Y(0.999)GVVY(0.001)K	Y	6	15;15;15	15	-0.0620953	1.13986	1.12418	-0.375878	0.170826	-1.75762	0.875832	NaN	0.998924	0.000631847	64.82	18.468	43.761	-0.18756	28782000
Cofilin-1	Cfl1	P18760	gi|6680924|ref|NP_031713.1|	gi|6680924|ref|NP_031713.1|	gi|6680924|ref|NP_031713.1|	LTGIKHELQANCYEEVKDR	LTGIKHELQANCY(1)EEVKDR	Y	13	140	140	NaN	NaN	NaN	NaN	NaN	NaN	1.62252	NaN	0.999821	5.83e-05	48.907	42.113	48.907	-0.20828	1045100
MICOS complex subunit Mic19	Chchd3	Q9CRB9	gi|21313618|ref|NP_079612.1|	gi|21313618|ref|NP_079612.1|	gi|21313618|ref|NP_079612.1|;gi|568942582|ref|XP_006506530.1|	YEYHPVCADLQTK	Y(0.047)EY(0.952)HPVCADLQTK	Y	3	179;184	179	0.167422	-0.192525	0.442562	NaN	NaN	-0.279196	0.218956	-0.154218	0.952373	0.000320867	58.338	55.282	43.594	-0.37085	2479200
Creatine kinase M-type	Ckm	P07310	gi|6671762|ref|NP_031736.1|	gi|6671762|ref|NP_031736.1|	gi|6671762|ref|NP_031736.1|	GGDDLDPNYVLSSR	GGDDLDPNY(0.984)VLS(0.013)S(0.003)R	Y	9	125	125	NaN	0.307522	-0.65933	-0.70514	-0.425122	0.829687	-0.470979	0.167985	0.98377	3.32e-05	84.753	71.008	68.044	0.15819	7148300
Creatine kinase M-type	Ckm	P07310	gi|6671762|ref|NP_031736.1|	gi|6671762|ref|NP_031736.1|	gi|6671762|ref|NP_031736.1|	GKYYPLK	GKY(0.007)Y(0.993)PLK	Y	4	174	174	-1.01546	-0.268143	-1.79827	-0.773882	0.425759	1.49542	0.143696	-0.0199165	0.993401	5.08e-06	105.39	72.92	105.39	-0.23732	7176300
Creatine kinase S-type, mitochondrial	Ckmt2	Q6P8J7	gi|38259206|ref|NP_940807.1|	gi|38259206|ref|NP_940807.1|	gi|38259206|ref|NP_940807.1|;gi|568983791|ref|XP_006517517.1|	GDLAGRYYK	GDLAGRY(0.5)Y(0.5)K	Y	7	207;207	207	-0.098031	NaN	0.560136	0.870239	NaN	NaN	NaN	NaN	0.5	1.13e-12	135.81	126.12	41.448	0.15029	19298000
Creatine kinase S-type, mitochondrial	Ckmt2	Q6P8J7	gi|38259206|ref|NP_940807.1|	gi|38259206|ref|NP_940807.1|	gi|38259206|ref|NP_940807.1|;gi|568983791|ref|XP_006517517.1|	GDLAGRYYK	GDLAGRY(0.027)Y(0.973)K	Y	8	208;208	208	-1.35034	-0.120043	-0.257474	0.857286	NaN	1.1506	0.720593	0.376736	0.972889	1.13e-12	139.86	128.91	119.75	0.47754	34666000
Creatine kinase S-type, mitochondrial	Ckmt2	Q6P8J7	gi|38259206|ref|NP_940807.1|	gi|38259206|ref|NP_940807.1|	gi|38259206|ref|NP_940807.1|	GIWHNYDK	GIWHNY(1)DK	Y	6	255	255	-0.986698	-0.461413	-0.397411	0.456842	NaN	0.955076	0.391921	0.171881	1	8.67e-06	77.318	69.386	77.318	0.0078353	18452000
Creatine kinase S-type, mitochondrial	Ckmt2	Q6P8J7	gi|38259206|ref|NP_940807.1|	gi|38259206|ref|NP_940807.1|	gi|38259206|ref|NP_940807.1|	RGTGGVDTAAVADVYDISNIDR	RGTGGVDTAAVADVY(0.98)DIS(0.019)NIDR	Y	15	368	368	0.200908	0.364342	0.112418	-2.17486	-1.26613	1.36616	0.197466	0.8419	0.980371	3.53e-22	149.33	132.71	78.976	0.7427	291210000
Creatine kinase S-type, mitochondrial	Ckmt2	Q6P8J7	gi|38259206|ref|NP_940807.1|	gi|38259206|ref|NP_940807.1|	gi|38259206|ref|NP_940807.1|;gi|568983791|ref|XP_006517517.1|	ITHGQFDERYVLSSR	ITHGQFDERY(0.998)VLS(0.002)SR	Y	10	159;159	159	NaN	0.0904799	0.0704921	-1.86945	NaN	0.635262	1.0396	0.616553	0.997931	1.09e-05	115.91	101.96	87.083	0.69927	20275000
Clathrin heavy chain 1	Cltc	Q68FD5	gi|51491845|ref|NP_001003908.1|	gi|51491845|ref|NP_001003908.1|	gi|51491845|ref|NP_001003908.1|;gi|568975337|ref|XP_006534048.1|;gi|568975335|ref|XP_006534047.1|;gi|568975333|ref|XP_006534046.1|	ALEHFTDLYDIKR	ALEHFTDLY(1)DIKR	Y	9	634;635;634;635	634	NaN	0.369973	0.0676	-0.577248	-0.757355	-0.084528	-0.0696215	NaN	0.999986	4.01e-06	107.65	96.41	107.65	-0.070892	3682000
Carnitine O-palmitoyltransferase 1, muscle isoform	Cpt1b	Q924X2	gi|162287165|ref|NP_034078.2|	gi|162287165|ref|NP_034078.2|	gi|162287165|ref|NP_034078.2|	ALLHGNCYNR	ALLHGNCY(1)NR	Y	8	449	449	0.144196	NaN	0.703887	0.752963	NaN	NaN	NaN	0.144235	1	0.000472346	82.645	70.409	82.645	-0.024169	7597600
Carnitine O-palmitoyltransferase 1, muscle isoform	Cpt1b	Q924X2	gi|162287165|ref|NP_034078.2|	gi|162287165|ref|NP_034078.2|	gi|162287165|ref|NP_034078.2|	EAIENSYQVAK	EAIENS(0.002)Y(0.998)QVAK	Y	7	534	534	-1.29596	-0.767334	NaN	0.235404	2.58568	0.96818	-0.205817	0.114614	0.99807	1.17e-09	128.01	102.54	128.01	0.012948	112220000
Carnitine O-palmitoyltransferase 1, muscle isoform	Cpt1b	Q924X2	gi|162287165|ref|NP_034078.2|	gi|162287165|ref|NP_034078.2|	gi|162287165|ref|NP_034078.2|	VWLYEGSR	VWLY(1)EGSR	Y	4	349	349	-0.297673	-0.219168	-0.389299	-0.310515	0.083125	0.763666	-0.0321696	-0.0319627	0.999753	0.0001	104.06	58.975	104.06	0.6305	16436000
Cysteine-rich protein 2	Crip2	Q9DCT8	gi|13195646|ref|NP_077185.1|	gi|13195646|ref|NP_077185.1|	gi|13195646|ref|NP_077185.1|;gi|568980303|ref|XP_006516249.1|	VYFAEK	VY(1)FAEK	Y	2	13;10	13	-0.150259	0.325432	0.54011	0.0734548	NaN	0.44775	-0.518888	-0.00215268	1	0.000296405	102.98	39.398	102.98	0.66843	6199700
Adapter molecule crk	Crk	Q64010	gi|469832293|ref|NP_001264148.1|	gi|469832293|ref|NP_001264148.1|	gi|469832293|ref|NP_001264148.1|;gi|568971452|ref|XP_006532188.1|;gi|568971450|ref|XP_006532187.1|;gi|31559995|ref|NP_598417.2|	QEEAEYVR	QEEAEY(1)VR	Y	6	136;136;136;136	136	1.65698	1.2077	1.77133	-1.25709	NaN	NaN	NaN	-0.370601	1	0.0108088	47.574	31.034	47.574	-0.33362	1284700
Citrate synthase, mitochondrial	Cs	Q9CZU6	gi|13385942|ref|NP_080720.1|	gi|13385942|ref|NP_080720.1|	gi|13385942|ref|NP_080720.1|	LVAQLYKIVPNILLEQGK	LVAQLY(1)KIVPNILLEQGK	Y	6	381	381	-0.367551	-0.120043	0.191196	0.255463	NaN	0.572606	0.580134	0.159877	1	7.92e-05	89.673	59.867	44.998	1.1098	6488100
Cysteine and glycine-rich protein 3	Csrp3	P50462	gi|7304987|ref|NP_038836.1|	gi|7304987|ref|NP_038836.1|	gi|7304987|ref|NP_038836.1|;gi|311771533|ref|NP_001185770.1|	TVYHAEEIQCNGR	TVY(1)HAEEIQCNGR	Y	3	18;18	18	-1.1319	0.359413	NaN	-0.158337	NaN	0.344834	0.0159195	NaN	0.999999	2.65e-13	142.47	133.28	141.58	1.0715	17931000
Catenin alpha-1	Ctnna1	P26231	gi|569003067|ref|XP_006525611.1|	gi|569003067|ref|XP_006525611.1|	gi|569003067|ref|XP_006525611.1|;gi|755560424|ref|XP_011245120.1|;gi|6753294|ref|NP_033948.1|	LVYDGIRDIR	LVY(1)DGIRDIR	Y	3	249;619;619	619	0.144196	0.106816	-0.583452	0.311007	0.0685771	-0.92195	-0.157651	-0.2558	1	0.00891948	46.462	33.831	46.462	0.63795	2075100
Catenin alpha-3	Ctnna3	Q65CL1	gi|568967202|ref|XP_006513538.1|	gi|568967202|ref|XP_006513538.1|	gi|568967202|ref|XP_006513538.1|;gi|256985121|ref|NP_001157848.1|;gi|256985119|ref|NP_808280.2|	ELESLDYLAFKR	ELESLDY(1)LAFKR	Y	7	186;186;186	186	0.0726321	-0.0518622	-0.0326295	-0.390084	1.08918	NaN	-1.21751	NaN	0.999987	2.22e-10	136.96	59.212	136.96	-0.088205	7511900
Catenin alpha-3	Ctnna3	Q65CL1	gi|568967202|ref|XP_006513538.1|	gi|568967202|ref|XP_006513538.1|	gi|568967202|ref|XP_006513538.1|;gi|256985121|ref|NP_001157848.1|;gi|256985119|ref|NP_808280.2|;gi|256985152|ref|NP_001157991.1|	IYDTIHDIR	IY(1)DTIHDIR	Y	2	614;614;614;347	614	-0.0999647	-0.621959	NaN	NaN	-0.00962436	-0.255092	0.00156522	0.155018	1	2.19e-16	144.77	117.47	144.77	-0.25362	7778500
Catenin beta-1	Ctnnb1	Q02248	gi|6671684|ref|NP_031640.1|	gi|6671684|ref|NP_031640.1|	gi|6671684|ref|NP_031640.1|;gi|260166642|ref|NP_001159374.1|	NEGVATYAAAVLFR	NEGVAT(0.175)Y(0.825)AAAVLFR	Y	7	654;654	654	0.702384	0.384196	NaN	NaN	NaN	-0.858173	-0.618754	-0.154218	0.825016	5.88e-05	73.386	61.803	69.92	2.0416	3781200
Catenin delta-1	Ctnnd1	P30999	gi|1039758901|ref|XP_017170695.1|;gi|146231979|ref|NP_001078922.1|	gi|1039758901|ref|XP_017170695.1|	gi|1039758901|ref|XP_017170695.1|;gi|568915193|ref|XP_006498699.1|;gi|83745122|ref|NP_031641.2|;gi|568915191|ref|XP_006498698.1|;gi|146219830|ref|NP_001078919.1|;gi|1039758899|ref|XP_017170690.1|;gi|568915185|ref|XP_006498695.1|;gi|568915183|ref|XP_006498694.1|;gi|568915181|ref|XP_006498693.1|;gi|568915177|ref|XP_006498691.1|;gi|568915173|ref|XP_006498689.1|;gi|568915171|ref|XP_006498688.1|;gi|10…	LNGPQDHNHLLYSTIPR	LNGPQDHNHLLY(0.766)S(0.195)T(0.039)IPR	Y	12	96;96;96;96;96;96;96;96;96;96;96;96;96;96;96;96;96;96;96	96	-0.00558035	-1.12821	NaN	2.96106	3.45918	-0.573489	0.106565	-0.154218	0.766449	0.000185496	106.38	94.956	106.38	-0.62318	9184400
Catenin delta-1	Ctnnd1	P30999	gi|1039758901|ref|XP_017170695.1|	gi|1039758901|ref|XP_017170695.1|	gi|1039758901|ref|XP_017170695.1|;gi|568915193|ref|XP_006498699.1|;gi|83745122|ref|NP_031641.2|;gi|568915191|ref|XP_006498698.1|;gi|146219830|ref|NP_001078919.1|;gi|1039758899|ref|XP_017170690.1|;gi|568915185|ref|XP_006498695.1|;gi|568915183|ref|XP_006498694.1|;gi|568915181|ref|XP_006498693.1|;gi|568915177|ref|XP_006498691.1|;gi|568915173|ref|XP_006498689.1|;gi|568915171|ref|XP_006498688.1|;gi|10…	SLDNNYSTLNER	SLDNNY(0.976)S(0.02)T(0.004)LNER	Y	6	898;904;904;904;904;904;898;904;904;904;904;904;904;797;803	904	NaN	NaN	NaN	-0.903534	-0.887059	NaN	NaN	NaN	0.97637	2.76e-10	130.1	97.01	130.1	0.64669	3701400
Catenin delta-1	Ctnnd1	P30999	gi|146231979|ref|NP_001078922.1|	gi|146231979|ref|NP_001078922.1|	gi|146231979|ref|NP_001078922.1|;gi|568915197|ref|XP_006498701.1|;gi|146219835|ref|NP_001078917.1|;gi|1039758903|ref|XP_017170697.1|;gi|568915189|ref|XP_006498697.1|;gi|568915187|ref|XP_006498696.1|;gi|1039758906|ref|XP_017170699.1|	SDNNYSTLNER	SDNNY(0.96)S(0.02)T(0.02)LNER	Y	5	877;883;883;883;877;883;776	NA	NaN	NaN	NaN	-1.44521	NaN	NaN	NaN	NaN	0.960442	1.51e-05	111.63	101.63	111.63	0.27937	2390200
NADH-cytochrome b5 reductase 1	Cyb5r1	Q9DB73	gi|21312524|ref|NP_082333.1|	gi|21312524|ref|NP_082333.1|	gi|21312524|ref|NP_082333.1|	HVYLSAR	HVY(1)LSAR	Y	3	84	84	NaN	NaN	NaN	NaN	NaN	-0.67096	1.01696	-0.461171	0.999945	0.00440836	82.671	43.008	82.671	0.11654	524750
Cytochrome c1, heme protein, mitochondrial	Cyc1	Q9D0M3	gi|13385006|ref|NP_079843.1|	gi|13385006|ref|NP_079843.1|	gi|13385006|ref|NP_079843.1|	LSDYFPKPYPNPEAAR	LSDY(1)FPKPYPNPEAAR	Y	4	174	174	NaN	-0.490475	-0.877219	-0.358846	0.428785	-0.404875	-0.406556	-0.480733	0.99966	5.63e-05	101.42	95.014	87.99	-0.58232	17049000
Cytochrome c, somatic	Cycs	P62897	gi|6681095|ref|NP_031834.1|	gi|6681095|ref|NP_031834.1|	gi|6681095|ref|NP_031834.1|	ADLIAYLKK	ADLIAY(1)LKK	Y	6	98	98	-0.0574901	-0.120043	0.15189	0.831797	0.764299	0.3181	-0.103762	0.178277	1	0.0038565	83.998	47.574	63.076	-0.72652	36283000
Cytochrome b (Fragment)	CYTB	B1P8W3	gi|34538610|ref|NP_904340.1|	gi|34538610|ref|NP_904340.1|	gi|34538610|ref|NP_904340.1|	DVNYGWLIR	DVNY(1)GWLIR	Y	4	75	75	0.238126	0.163238	-0.388665	NaN	-0.110099	0.717307	-0.186929	0.271772	1	0.000283139	97.431	79.611	65.224	0.076517	5414300
MKIAA4082 protein (Fragment)	Dennd4a	Q5DTP4	gi|755529676|ref|XP_011240955.1|	gi|755529676|ref|XP_011240955.1|	gi|755529676|ref|XP_011240955.1|;gi|755529674|ref|XP_011240954.1|;gi|755529672|ref|XP_011240953.1|;gi|568960609|ref|XP_006510808.1|;gi|568960607|ref|XP_006510807.1|;gi|568960605|ref|XP_006510806.1|;gi|568960603|ref|XP_006510805.1|;gi|568960601|ref|XP_006510804.1|;gi|242332563|ref|NP_001156389.1|	YSKIPR	Y(0.904)S(0.096)KIPR	Y	1	1698;1698;1698;1698;1698;1698;1698;1698;1698	NA	-2.14546	NaN	NaN	-0.430537	-0.884589	-0.130205	NaN	NaN	0.903898	0.024454	54.537	16.335	54.537	0.4366	2727200
Desmin	Des	P31001	gi|33563250|ref|NP_034173.1|	gi|33563250|ref|NP_034173.1|	gi|33563250|ref|NP_034173.1|	AQYETIAAK	AQY(0.996)ET(0.004)IAAK	Y	3	280	280	-0.533647	0.959191	-0.091451	-1.28075	NaN	0.488328	0.975106	-0.222374	0.996271	0.00352127	58.474	32.369	58.474	-0.054666	2667500
Desmin	Des	P31001	gi|33563250|ref|NP_034173.1|	gi|33563250|ref|NP_034173.1|	gi|33563250|ref|NP_034173.1|	FANYIEK	FANY(1)IEK	Y	4	121	121	NaN	-0.206666	0.480687	0.775235	0.17268	-0.317796	0.273816	-0.186607	1	6.58e-05	55.676	39.129	55.531	0.26395	4364500
Desmin	Des	P31001	gi|33563250|ref|NP_034173.1|	gi|33563250|ref|NP_034173.1|	gi|33563250|ref|NP_034173.1|	FASEANGYQDNIAR	FAS(0.024)EANGY(0.976)QDNIAR	Y	8	362	362	0.0841661	-0.318553	NaN	NaN	NaN	-0.235745	0.926146	0.382677	0.975562	0.00134666	40.941	37.225	40.941	-0.24378	2320300
Dystrophin	Dmd	P11531	gi|1039796219|ref|XP_017173866.1|	gi|1039796219|ref|XP_017173866.1|	gi|1039796219|ref|XP_017173866.1|;gi|1039796216|ref|XP_017173865.1|;gi|1039796213|ref|XP_017173864.1|;gi|1039796209|ref|XP_017173863.1|;gi|6681203|ref|NP_031894.1|;gi|1039796206|ref|XP_017173862.1|;gi|569009601|ref|XP_006527831.1|;gi|569009599|ref|XP_006527830.1|;gi|569009611|ref|XP_006527836.1|	IFLTEQPLEGLEKLYQEPR	IFLTEQPLEGLEKLY(1)QEPR	Y	15	2878;2878;2834;2878;2878;2878;2870;2878;170	2878	0.259851	-0.245784	NaN	NaN	NaN	NaN	NaN	NaN	1	6.33e-06	85.087	79.272	85.087	-0.3713	8616600
Desmocollin-2 (Fragment)	Dsc2	F6RM34	gi|958157205|ref|NP_001304292.1|	gi|958157205|ref|NP_001304292.1|	gi|958157205|ref|NP_001304292.1|;gi|7305007|ref|NP_038533.1|;gi|958157207|ref|NP_001304294.1|	HTYSEWYNFIQPR	HT(0.135)Y(0.729)S(0.135)EWYNFIQPR	Y	3	681;824;824	224	0.144196	NaN	0.0850236	0.935492	1.32496	NaN	NaN	0.982634	0.728996	7.53e-05	81.92	72.638	81.92	0.43264	4712500
Desmoplakin	Dsp	E9Q557	gi|190194418|ref|NP_076331.2|	gi|190194418|ref|NP_076331.2|	gi|190194418|ref|NP_076331.2|;gi|568981521|ref|XP_006516595.1|	AIKEKEYEIER	AIKEKEY(1)EIER	Y	7	1181;1181	1181	NaN	NaN	0.96564	NaN	NaN	1.54641	NaN	-0.154218	1	0.00255673	49.448	39.793	49.448	0.059288	707000
Desmoplakin	Dsp	E9Q557	gi|190194418|ref|NP_076331.2|	gi|190194418|ref|NP_076331.2|	gi|190194418|ref|NP_076331.2|;gi|568981521|ref|XP_006516595.1|	SAIYQLEEEYENLLK	SAIY(1)QLEEEYENLLK	Y	4	261;261	261	-0.476896	-0.598414	NaN	0.0264328	-0.489256	0.173839	-0.192703	0.546039	0.99991	1.06e-05	118.21	103.33	118.21	0.28767	31961000
Desmoplakin	Dsp	E9Q557	gi|190194418|ref|NP_076331.2|	gi|190194418|ref|NP_076331.2|	gi|190194418|ref|NP_076331.2|;gi|568981521|ref|XP_006516595.1|	ETQTEYEWTVDSSK	ET(0.011)QT(0.061)EY(0.865)EWT(0.061)VDS(0.001)SK	Y	6	1969;1370	1969	0.103466	NaN	1.27753	NaN	NaN	0.553706	NaN	0.525956	0.864608	0.000399008	51.771	41.396	51.771	0.079791	4364400
Desmoplakin	Dsp	E9Q557	gi|190194418|ref|NP_076331.2|	gi|190194418|ref|NP_076331.2|	gi|190194418|ref|NP_076331.2|;gi|568981521|ref|XP_006516595.1|	GAGGYTCQSGSGWDEFTKR	GAGGY(0.826)T(0.172)CQS(0.002)GS(0.001)GWDEFTKR	Y	5	184;184	184	-0.352154	-0.105188	-0.208543	-0.0361259	1.04949	0.251349	NaN	-0.169229	0.825743	2.59e-05	62.94	55.231	62.94	-1.664	2500600
Desmoplakin	Dsp	E9Q557	gi|190194418|ref|NP_076331.2|	gi|190194418|ref|NP_076331.2|	gi|190194418|ref|NP_076331.2|;gi|568981521|ref|XP_006516595.1|	LPVEEAYKR	LPVEEAY(1)KR	Y	7	2328;1729	2328	0.144196	0.330424	-0.389317	0.833993	NaN	NaN	-0.0827927	NaN	1	0.0135082	63.816	15.022	63.816	0.28081	989930
Desmoplakin	Dsp	E9Q557	gi|190194418|ref|NP_076331.2|	gi|190194418|ref|NP_076331.2|	gi|190194418|ref|NP_076331.2|	LRIDYER	LRIDY(1)ER	Y	5	1554	1554	-0.650625	0.60108	-0.176129	1.02803	NaN	NaN	0.0873024	0.553513	1	0.00614373	85.67	23.708	85.67	-0.53234	19106000
Desmoplakin	Dsp	E9Q557	gi|190194418|ref|NP_076331.2|	gi|190194418|ref|NP_076331.2|	gi|190194418|ref|NP_076331.2|	VQYDLQK	VQY(1)DLQK	Y	3	1524	1524	-0.501203	NaN	0.402418	-0.687165	NaN	0.127172	0.534114	0.0177752	1	0.00137514	98.523	24.907	43.124	-0.2565	2202400
Desmoplakin	Dsp	E9Q557	gi|190194418|ref|NP_076331.2|	gi|190194418|ref|NP_076331.2|	gi|190194418|ref|NP_076331.2|;gi|568981521|ref|XP_006516595.1|	WLPYEAGQR	WLPY(1)EAGQR	Y	4	2732;2133	2732	NaN	NaN	NaN	NaN	NaN	-0.548445	-0.116406	-0.28811	1	0.00586821	52.579	40.985	52.579	0.019118	2103200
Desmoplakin	Dsp	E9Q557	gi|190194418|ref|NP_076331.2|	gi|190194418|ref|NP_076331.2|	gi|190194418|ref|NP_076331.2|;gi|568981521|ref|XP_006516595.1|	YEMTYSGGGGGGGGGGGGGTSR	Y(0.002)EMT(0.017)Y(0.914)S(0.067)GGGGGGGGGGGGGTSR	Y	5	32;32	32	NaN	NaN	NaN	-1.44521	NaN	NaN	NaN	NaN	0.914228	5.42e-06	79.935	73.648	79.935	0.18548	3593900
Desmoplakin	Dsp	E9Q557	gi|190194418|ref|NP_076331.2|	gi|190194418|ref|NP_076331.2|	gi|190194418|ref|NP_076331.2|;gi|568981521|ref|XP_006516595.1|	YQAECSQFK	Y(1)QAECSQFK	Y	1	1077;1077	1077	NaN	NaN	NaN	-1.44521	NaN	NaN	NaN	NaN	0.999919	0.0058834	52.549	41.791	52.549	-0.67128	578390
Dual specificity tyrosine-phosphorylation-regulated kinase 1B	Dyrk1b	Q9Z188	gi|6753698|ref|NP_034222.1|	gi|6753698|ref|NP_034222.1|	gi|6753698|ref|NP_034222.1|;gi|83816922|ref|NP_001033046.1|;gi|568944834|ref|XP_006539590.1|;gi|568944832|ref|XP_006539589.1|;gi|406035327|ref|NP_001258299.1|;gi|755554822|ref|XP_011244401.1|;gi|755554820|ref|XP_011244400.1|;gi|755554816|ref|XP_011244398.1|;gi|755554814|ref|XP_011244397.1|;gi|755554812|ref|XP_011244396.1|;gi|24418935|ref|NP_031916.1|;gi|164607150|ref|NP_001106860.1|	IYQYIQSR	IYQY(1)IQS(1)R	Y	4	273;273;333;333;333;283;292;312;321;321;321;321	273	0.190461	0.288157	0.513454	0.0472709	-0.348512	0.184581	0.324946	0.128606	0.999994	1.21e-13	173.73	56.629	66.056	-0.67055	708570000
Dual specificity tyrosine-phosphorylation-regulated kinase 4	Dyrk4	Q8BI55	gi|755515738|ref|XP_011239409.1|	gi|755515738|ref|XP_011239409.1|	gi|755515738|ref|XP_011239409.1|;gi|755535031|ref|XP_011241854.1|;gi|67846105|ref|NP_001014412.1|;gi|568940075|ref|XP_006505319.1|;gi|295444860|ref|NP_997093.2|;gi|568940073|ref|XP_006505318.1|;gi|568968396|ref|XP_006514109.1|;gi|568940069|ref|XP_006505316.1|;gi|755515733|ref|XP_011239407.1|;gi|755515731|ref|XP_011239406.1|	VYTYIQSR	VYTY(1)IQSR	Y	4	432;307;380;353;379;389;446;413;422;432	379	0.054751	NaN	0.916056	NaN	NaN	-0.188367	0.874545	0.511124	0.999885	6.94e-06	154.71	103.28	154.71	0.3273	18971000
Dysferlin	Dysf	Q9ESD7	gi|1039775118|ref|XP_017177083.1|	gi|1039775118|ref|XP_017177083.1|	gi|1039775118|ref|XP_017177083.1|;gi|568941985|ref|XP_006506244.1|;gi|860610475|ref|NP_001297081.1|;gi|568941981|ref|XP_006506242.1|;gi|568941979|ref|XP_006506241.1|;gi|568941977|ref|XP_006506240.1|;gi|568941975|ref|XP_006506239.1|;gi|118026931|ref|NP_001071162.1|;gi|116174791|ref|NP_067444.2|;gi|568941973|ref|XP_006506238.1|;gi|568941971|ref|XP_006506237.1|;gi|568941969|ref|XP_006506236.1|;gi|56…	ITLYDYDLLSKDEK	IT(0.007)LY(0.532)DY(0.457)DLLS(0.004)KDEK	Y	4	970;1636;1637;1650;1651;1657;1658;1667;1668;1671;1672;1681;1682;1688;1689;1692;1698;1707;1709;1719;1722;1723	1658	NaN	-0.120043	NaN	NaN	NaN	NaN	NaN	NaN	0.531982	0.00334086	40.941	34.464	40.941	0.48436	296730
Elongation factor 1-alpha 1	Eef1a1	P10126	gi|126032329|ref|NP_034236.2|;gi|6681273|ref|NP_031932.1|	gi|6681273|ref|NP_031932.1|	gi|126032329|ref|NP_034236.2|;gi|6681273|ref|NP_031932.1|	EHALLAYTLGVK	EHALLAY(0.998)T(0.002)LGVK	Y	7	141;141	141	-0.126064	-0.116478	-0.221759	-0.052415	-0.00962436	-0.0943786	NaN	0.139934	0.997794	5.74e-41	193.73	164.78	193.73	-0.45263	174450000
Elongation factor 1-alpha 1	Eef1a1	P10126	gi|126032329|ref|NP_034236.2|;gi|6681273|ref|NP_031932.1|	gi|6681273|ref|NP_031932.1|	gi|126032329|ref|NP_034236.2|;gi|6681273|ref|NP_031932.1|	STTTGHLIYK	STTTGHLIY(1)K	Y	9	29;29	29	NaN	0.27034	-0.231545	0.281504	NaN	NaN	0.913548	NaN	1	4.29e-06	114.4	87.807	114.4	2.1939	9352700
Elongation factor 1-alpha 2	Eef1a2	P62631	gi|6681273|ref|NP_031932.1|	gi|6681273|ref|NP_031932.1|	gi|6681273|ref|NP_031932.1|	EVSAYIKK	EVS(0.002)AY(0.998)IKK	Y	5	177	177	NaN	NaN	NaN	NaN	-0.00962436	NaN	NaN	NaN	0.997526	0.0169116	69.825	37.683	69.825	-0.050254	460740
Eukaryotic translation initiation factor 1	Eif1	P48024	gi|22165347|ref|NP_035638.1|	gi|22165347|ref|NP_035638.1|	gi|22165347|ref|NP_035638.1|	SAIQNLHSFDPFADASKGDDLLPAGTEDYIHIR	SAIQNLHSFDPFADASKGDDLLPAGT(0.009)EDY(0.991)IHIR	Y	29	30	30	0.221049	0.38295	-0.948205	NaN	NaN	NaN	-1.37595	NaN	0.990771	3.5e-15	64.885	61.889	64.885	-0.76042	14728000
Alpha-enolase	Eno1	P17182	gi|1039766553|ref|XP_017175442.1|;gi|755509256|ref|XP_006538588.2|	gi|1039766553|ref|XP_017175442.1|	gi|1039766553|ref|XP_017175442.1|;gi|755509256|ref|XP_006538588.2|;gi|70794816|ref|NP_001020559.1|;gi|158853992|ref|NP_075608.2|	AAVPSGASTGIYEALELR	AAVPS(0.001)GAS(0.006)T(0.02)GIY(0.974)EALELR	Y	12	44;44;44;44	44	-0.0183286	-0.120043	-0.437848	NaN	NaN	0.210443	-0.469427	0.07314	0.973759	1.14e-05	60.062	47.545	60.062	0.31038	21069000
Alpha-enolase	Eno1	P17182	gi|1039766553|ref|XP_017175442.1|;gi|755509256|ref|XP_006538588.2|	gi|1039766553|ref|XP_017175442.1|	gi|1039766553|ref|XP_017175442.1|;gi|755509256|ref|XP_006538588.2|;gi|70794816|ref|NP_001020559.1|;gi|158853992|ref|NP_075608.2|	GNPTVEVDLYTAK	GNPTVEVDLY(0.784)T(0.216)AK	Y	10	25;25;25;25	25	NaN	NaN	NaN	NaN	NaN	-0.588696	-1.37595	-1.21554	0.784008	0.000496978	54.898	47.032	54.898	0.57914	3581300
Alpha-enolase	Eno1	P17182	gi|1039766553|ref|XP_017175442.1|	gi|1039766553|ref|XP_017175442.1|	gi|1039766553|ref|XP_017175442.1|	YVNEFLAPALCTQK	Y(1)VNEFLAPALCTQK	Y	1	68	NA	-0.382232	0.38716	-0.327908	-1.13081	0.254746	-0.101262	-1.12724	-0.454919	0.999999	2.07e-06	89.663	85.248	61.409	-0.73867	25288000
Beta-enolase	Eno3	P21550	gi|6679651|ref|NP_031959.1|	gi|6679651|ref|NP_031959.1|	gi|6679651|ref|NP_031959.1|;gi|568971527|ref|XP_006532225.1|;gi|443497949|ref|NP_001263214.1|;gi|209862931|ref|NP_001129534.1|;gi|568971525|ref|XP_006532224.1|	AAVPSGASTGIYEALELRDGDKAR	AAVPS(0.002)GAS(0.002)T(0.005)GIY(0.991)EALELRDGDKAR	Y	12	44;44;44;44;130	44	0.144196	0.022432	-0.808205	-1.34578	0.430158	-0.265389	NaN	-0.254813	0.991486	1.01e-05	60.062	47.545	44.788	-2.0805	29568000
Ephrin type-A receptor 4	Epha4	Q03137	gi|568907510|ref|XP_006496471.1|	gi|568907510|ref|XP_006496471.1|	gi|568907510|ref|XP_006496471.1|;gi|568907508|ref|XP_006496470.1|;gi|34328113|ref|NP_031962.2|	TYVDPFTYEDPNQAVR	T(0.176)Y(0.824)VDPFTYEDPNQAVR	Y	2	545;596;596	596	NaN	NaN	NaN	-0.669139	0.669724	-2.60811	-2.703	NaN	0.82421	0.000190816	50.305	44.41	50.305	0.26699	12903000
Ephrin type-A receptor 4	Epha4	Q03137	gi|568907510|ref|XP_006496471.1|	gi|568907510|ref|XP_006496471.1|	gi|568907510|ref|XP_006496471.1|;gi|568907508|ref|XP_006496470.1|;gi|34328113|ref|NP_031962.2|	TYVDPFTYEDPNQAVR	T(0.497)Y(0.503)VDPFT(0.131)Y(0.869)EDPNQAVR	Y	8	551;602;602	602	NaN	-0.599878	-1.45367	-0.0770875	2.21665	NaN	NaN	0.205235	0.869053	0.000115995	63.682	54.885	63.682	-1.7426	5969400
Ephrin type-B receptor 3	Ephb3	P54754	gi|33859548|ref|NP_034273.1|	gi|33859548|ref|NP_034273.1|	gi|33859548|ref|NP_034273.1|;gi|568994614|ref|XP_006521851.1|	LQQYIAPGMK	LQQY(1)IAPGMK	Y	4	595;595	595	0.314403	1.66252	0.00561307	NaN	NaN	0.0982856	0.227513	-0.302273	1	0.000435859	89.029	67.036	89.029	-0.27457	3766100
Receptor protein-tyrosine kinase	Erbb2	Q80Y89	gi|54873610|ref|NP_001003817.1|	gi|54873610|ref|NP_001003817.1|	gi|54873610|ref|NP_001003817.1|	LLDIDETEYHADGGKVPIK	LLDIDET(0.191)EY(0.809)HADGGKVPIK	Y	9	878	NA	0.447184	-0.504056	NaN	NaN	NaN	NaN	NaN	NaN	0.809363	7.77e-05	45.618	41.07	45.618	0.38398	5991100
Endoplasmic reticulum resident protein 29	Erp29	F8WJI4	gi|19526463|ref|NP_080405.1|	gi|19526463|ref|NP_080405.1|	gi|19526463|ref|NP_080405.1|	FDTQYPYGEKQDEFKR	FDTQY(0.007)PY(0.992)GEKQDEFKR	Y	7	68	NA	0.169402	-0.120043	-0.110442	-0.194022	-0.0370966	0.0558375	0.145921	NaN	0.992086	0.000101235	77.746	71.52	77.746	0.014927	24467000
Extended synaptotagmin-1	Esyt1	Q3U7R1	gi|33859650|ref|NP_035973.1|	gi|33859650|ref|NP_035973.1|	gi|33859650|ref|NP_035973.1|	DLPDPYVSVLLLPDKNR	DLPDPY(0.978)VS(0.022)VLLLPDKNR	Y	6	997	997	0.252304	0.654718	-0.532021	NaN	-1.82992	-0.67096	-0.38037	NaN	0.978139	3.51e-05	64.565	53.45	54.768	0.040008	8502500
Extended synaptotagmin-1	Esyt1	Q3U7R1	gi|33859650|ref|NP_035973.1|	gi|33859650|ref|NP_035973.1|	gi|33859650|ref|NP_035973.1|	GTKPPSPYATITVGETSHK	GT(0.002)KPPS(0.043)PY(0.737)AT(0.217)IT(0.001)VGETSHK	Y	8	809	809	1.49864	1.32344	0.902307	-2.2031	-2.71187	0.451249	0.324986	-0.154218	0.736579	1.95e-05	65.887	59.924	60.062	-0.48109	15612000
Etl4 protein	Etl4	B2RY09	gi|568912310|ref|XP_006497493.1|	gi|568912310|ref|XP_006497493.1|	gi|568912310|ref|XP_006497493.1|;gi|46358401|ref|NP_084171.2|;gi|345842402|ref|NP_001171101.2|;gi|46358399|ref|NP_835160.2|;gi|1039759760|ref|XP_017172320.1|;gi|568912306|ref|XP_006497491.1|;gi|568912304|ref|XP_006497490.1|;gi|568912302|ref|XP_006497489.1|;gi|568912288|ref|XP_006497482.1|;gi|568912284|ref|XP_006497480.1|;gi|755496747|ref|XP_011237269.1|;gi|294979218|ref|NP_001171102.1|;gi|5689122…	NEGFYADPYLYHEGR	NEGFY(1)ADPYLYHEGR	Y	5	444;393;393;393;444;444;444;444;243;309;313;393;393;444;444;444;444;111;111;111;111;111;227	393	-1.03968	NaN	NaN	2.33025	3.25358	-1.09449	-0.868035	-0.154218	0.999924	5.02e-05	86.578	78.264	86.578	0.61397	8697500
Etl4 protein	Etl4	B2RY09	gi|568912310|ref|XP_006497493.1|	gi|568912310|ref|XP_006497493.1|	gi|568912310|ref|XP_006497493.1|;gi|46358401|ref|NP_084171.2|;gi|345842402|ref|NP_001171101.2|;gi|46358399|ref|NP_835160.2|;gi|1039759760|ref|XP_017172320.1|;gi|568912306|ref|XP_006497491.1|;gi|568912304|ref|XP_006497490.1|;gi|568912302|ref|XP_006497489.1|;gi|568912288|ref|XP_006497482.1|;gi|568912284|ref|XP_006497480.1|;gi|755496747|ref|XP_011237269.1|;gi|294979218|ref|NP_001171102.1|;gi|5689122…	NVYYELNDVR	NVY(0.998)Y(0.002)ELNDVR	Y	3	295;244;244;244;295;295;295;295;94;160;164;244;244;295;295;295;295	244	0.0292313	-0.331607	0.884493	-0.00129071	0.124958	0.205636	0.217085	-0.123331	0.998166	0.000321237	94.692	58.268	94.692	-0.041722	13256000
Tyrosine-protein kinase Fer	Fer	P70451	gi|1039752684|ref|XP_017172733.1|	gi|1039752684|ref|XP_017172733.1|	gi|1039752684|ref|XP_017172733.1|;gi|226054045|ref|NP_032026.2|;gi|568998989|ref|XP_006523710.1|;gi|1039752682|ref|XP_017172732.1|;gi|568998984|ref|XP_006523708.1|;gi|1039752677|ref|XP_017172731.1|;gi|556695416|ref|NP_001273344.1|;gi|755555983|ref|XP_011244595.1|;gi|568998980|ref|XP_006523706.1|;gi|568998976|ref|XP_006523704.1|;gi|568998974|ref|XP_006523703.1|;gi|226054043|ref|NP_001033086.2|	QEDGGVYSSSGLK	QEDGGVY(0.706)S(0.222)S(0.057)S(0.015)GLK	Y	7	326;345;346;346;642;642;657;714;714;715;715;715	715	NaN	NaN	NaN	1.00289	NaN	NaN	NaN	0.339221	0.706314	0.000295622	61.167	40.379	61.167	-0.11297	1459800
FYVE, RhoGEF and PH domain-containing protein 5	Fgd5	Q80UZ0	gi|983173841|ref|NP_766319.3|	gi|983173841|ref|NP_766319.3|	gi|983173841|ref|NP_766319.3|;gi|568941606|ref|XP_006506063.1|	HLFLMNDTLLYTHPQK	HLFLMNDT(0.002)LLY(0.901)T(0.097)HPQK	Y	11	1193;1194	898	0.259259	0.22323	NaN	NaN	NaN	-0.200414	NaN	-0.279259	0.901256	8.97e-05	61.444	56.774	61.444	-0.019697	8630200
Filamin-C	Flnc	Q8VHX6	gi|901694068|ref|NP_001298003.1|	gi|901694068|ref|NP_001298003.1|	gi|901694068|ref|NP_001298003.1|;gi|124487139|ref|NP_001074654.1|	TPCEEVYVK	TPCEEVY(1)VK	Y	7	2651;2684	2684	-0.0190898	-0.538079	NaN	-0.19466	NaN	0.0800316	0.588237	NaN	1	8.27e-05	96.948	84.901	96.948	-0.32708	2757300
Filamin-C	Flnc	Q8VHX6	gi|901694068|ref|NP_001298003.1|	gi|901694068|ref|NP_001298003.1|	gi|901694068|ref|NP_001298003.1|;gi|124487139|ref|NP_001074654.1|	VHTPSGAVEECYVSELDSDKHTIR	VHT(0.001)PS(0.002)GAVEECY(0.974)VS(0.022)ELDS(0.001)DKHTIR	Y	12	2423;2456	2456	-0.480322	0.247413	NaN	NaN	NaN	NaN	NaN	-0.648483	0.974288	5.85e-06	47.75	44.389	47.75	0.29013	1486400
Vascular endothelial growth factor receptor 1	Flt1	P35969	gi|34328180|ref|NP_034358.2|	gi|34328180|ref|NP_034358.2|	gi|34328180|ref|NP_034358.2|	LGDLLQANVQQDGKDYIPLNAILTR	LGDLLQANVQQDGKDY(1)IPLNAILTR	Y	16	1169	1169	0.144196	NaN	-0.313994	1.08838	1.71282	-0.958616	NaN	NaN	0.999954	6.63e-08	80.786	74.56	80.786	-0.44562	11328000
Vascular endothelial growth factor receptor 1	Flt1	P35969	gi|34328180|ref|NP_034358.2|	gi|34328180|ref|NP_034358.2|	gi|34328180|ref|NP_034358.2|	YVNAFK	Y(1)VNAFK	Y	1	1213	1213	NaN	NaN	NaN	NaN	-0.00962436	NaN	NaN	NaN	1	0.00161324	119.23	54.671	119.23	0.40799	172700
Tyrosine-protein kinase Fyn	Fyn	P39688	gi|171543839|ref|NP_001116364.1|	gi|171543839|ref|NP_001116364.1|	gi|171543839|ref|NP_001116364.1|;gi|171543837|ref|NP_032080.2|;gi|755532807|ref|XP_011241419.1|;gi|568965001|ref|XP_006512603.1|;gi|568964999|ref|XP_006512602.1|;gi|171543841|ref|NP_001116365.1|;gi|6678617|ref|NP_033561.1|;gi|326806988|ref|NP_001192062.1|;gi|326806986|ref|NP_001192061.1|;gi|568930578|ref|XP_006538608.1|;gi|568930576|ref|XP_006538607.1|;gi|171542819|ref|NP_034338.3|	GAYSLSIR	GAY(1)SLSIR	Y	3	185;185;185;185;185;185;192;192;192;168;168;168	185	-0.948994	0.0604131	NaN	1.02434	NaN	NaN	0.0380057	0.11056	0.999996	7.5e-05	143.61	87.934	143.61	-0.041835	6936700
Tyrosine-protein kinase Fyn	Fyn	P39688	gi|171543839|ref|NP_001116364.1|	gi|171543839|ref|NP_001116364.1|	gi|171543839|ref|NP_001116364.1|;gi|171543837|ref|NP_032080.2|;gi|755532807|ref|XP_011241419.1|;gi|568965001|ref|XP_006512603.1|;gi|568964999|ref|XP_006512602.1|;gi|171543841|ref|NP_001116365.1|;gi|6678617|ref|NP_033561.1|;gi|326806988|ref|NP_001192062.1|;gi|326806986|ref|NP_001192061.1|	LDNGGYYITTR	LDNGGY(0.851)Y(0.148)ITTR	Y	6	213;213;213;213;213;213;220;220;220	213	0.144196	NaN	0.10128	-0.320682	-0.506808	-0.30633	0.350313	NaN	0.851464	4.26e-10	134.61	123.51	100.93	0.94856	23096000
Megakaryocyte and platelet inhibitory receptor G6b	G6b	D7PDD4	gi|300360565|ref|NP_001177941.1|	gi|300360565|ref|NP_001177941.1|	gi|300360565|ref|NP_001177941.1|;gi|568998507|ref|XP_006523482.1|	ISGHLDQEPSLHYADLDHSVLGR	ISGHLDQEPS(0.02)LHY(0.977)ADLDHS(0.003)VLGR	Y	13	212;259	212	-0.226507	0.174615	-0.58412	0.52797	NaN	0.765095	1.09026	0.487394	0.97698	1.76e-07	60.133	57.564	60.133	-0.66645	6902300
Glyceraldehyde-3-phosphate dehydrogenase	Gapdh	P16858	gi|6679937|ref|NP_032110.1|	gi|6679937|ref|NP_032110.1|	gi|6679937|ref|NP_032110.1|;gi|149273202|ref|XP_001476757.1|;gi|576080555|ref|NP_001276655.1|	LISWYDNEYGYSNR	LISWY(0.001)DNEY(0.934)GY(0.051)S(0.015)NR	Y	9	316;316;342	316	0.0273669	0.067552	NaN	NaN	0.036417	0.132008	-1.38449	-0.145729	0.93424	5.76e-05	77.776	67.976	59.709	0.0073149	21878000
Glyceraldehyde-3-phosphate dehydrogenase	Gapdh	P16858	gi|6679937|ref|NP_032110.1|	gi|6679937|ref|NP_032110.1|	gi|6679937|ref|NP_032110.1|;gi|149273202|ref|XP_001476757.1|;gi|576080555|ref|NP_001276655.1|	VVDLMAYMASKE	VVDLMAY(0.984)MAS(0.016)KE	Y	7	328;328;354	328	0.387277	-0.120043	-0.398148	-0.914042	-1.18304	-0.658845	-0.271522	0.394721	0.983624	0.00840894	46.069	38.203	46.069	-0.26663	12067000
Glycinamide ribonucleotide synthetase	Gart	Q3TH49	gi|93102415|ref|NP_034386.2|	gi|93102415|ref|NP_034386.2|	gi|93102415|ref|NP_034386.2|;gi|568997285|ref|XP_006522975.1|;gi|568997283|ref|XP_006522974.1|;gi|568997281|ref|XP_006522973.1|	GYPGAYTK	GYPGAY(0.971)T(0.029)K	Y	6	348;348;348;348	NA	-0.183916	0.942404	-0.677582	0.0327542	NaN	NaN	0.853186	0.112924	0.971097	0.0107958	47.603	36.192	47.603	0.19739	1163900
ARF GTPase-activating protein GIT1	Git1	Q68FF6	gi|568973161|ref|XP_006533012.1|	gi|568973161|ref|XP_006533012.1|	gi|568973161|ref|XP_006533012.1|;gi|51921285|ref|NP_001004144.1|	LQPFHSTELEDDAIYSVHVPAGLYR	LQPFHS(0.003)T(0.003)ELEDDAIY(0.884)S(0.109)VHVPAGLYR	Y	15	545;554	554	NaN	-0.120043	NaN	2.23288	3.24635	-1.50289	NaN	NaN	0.884085	6.5e-08	60.272	56.652	48.872	-0.24331	11300000
Gap junction alpha-1 protein	Gja1	P23242	gi|6753992|ref|NP_034418.1|	gi|6753992|ref|NP_034418.1|	gi|6753992|ref|NP_034418.1|	FKYGIEEHGK	FKY(1)GIEEHGK	Y	3	137	137	-0.492399	-0.981206	NaN	1.39245	0.115331	1.82165	1.00458	NaN	1	0.000461007	77.744	61.366	48.284	0.41175	9038700
Gap junction alpha-1 protein	Gja1	P23242	gi|6753992|ref|NP_034418.1|	gi|6753992|ref|NP_034418.1|	gi|6753992|ref|NP_034418.1|	QASEQNWANYSAEQNR	QAS(0.002)EQNWANY(0.763)S(0.235)AEQNR	Y	10	313	313	NaN	NaN	NaN	-0.853648	-1.02962	NaN	NaN	NaN	0.763162	0.000275533	45.618	40.859	45.618	0.91782	1349400
Gap junction alpha-1 protein	Gja1	P23242	gi|6753992|ref|NP_034418.1|	gi|6753992|ref|NP_034418.1|	gi|6753992|ref|NP_034418.1|	SDPYHATTGPLSPSK	S(0.001)DPY(0.999)HATTGPLSPSK	Y	4	247	247	-2.8651	NaN	-1.44986	0.109931	NaN	0.847613	-0.380957	0.0566534	0.998703	5.31e-47	181.75	164.5	181.75	-1.2283	38260000
Gap junction alpha-1 protein	Gja1	P23242	gi|6753992|ref|NP_034418.1|	gi|6753992|ref|NP_034418.1|	gi|6753992|ref|NP_034418.1|	YAYFNGCSSPTAPLSPMSPPGYK	Y(0.922)AY(0.063)FNGCS(0.007)S(0.007)PT(0.001)APLSPMSPPGYK	Y	1	265	265	NaN	NaN	NaN	-0.796999	-1.21794	NaN	NaN	NaN	0.922332	3.62e-05	41.115	38.471	41.115	0.29338	10105000
Protein ATP6V1FNB	Gm9047	B9EJX3	gi|223941805|ref|NP_001138832.1|	gi|223941805|ref|NP_001138832.1|	gi|223941805|ref|NP_001138832.1|	YQYLNTR	YQY(1)LNTR	Y	3	114	114	0.0532034	0.151257	0.433874	0.192849	-0.00962436	-0.147948	0.415137	-0.00258369	0.999776	0.000754392	104.21	61.085	104.21	0.23633	9990600
Aspartate aminotransferase, cytoplasmic	Got1	P05201	gi|160298209|ref|NP_034454.2|	gi|160298209|ref|NP_034454.2|	gi|160298209|ref|NP_034454.2|	IANDNSLNHEYLPILGLAEFR	IANDNS(0.042)LNHEY(0.958)LPILGLAEFR	Y	11	71	71	1.2721	NaN	NaN	NaN	-1.00018	NaN	NaN	-0.154218	0.958247	9.6e-06	60.561	56.303	60.561	-0.88824	6817900
Aspartate aminotransferase, cytoplasmic	Got1	P05201	gi|160298209|ref|NP_034454.2|	gi|160298209|ref|NP_034454.2|	gi|160298209|ref|NP_034454.2|	NFGLYNER	NFGLY(1)NER	Y	5	264	264	-0.0243432	NaN	1.36474	0.347392	NaN	-0.15747	0.628397	-0.336459	1	0.0157842	41.448	20.823	41.448	1.1146	980790
Aspartate aminotransferase, cytoplasmic	Got1	P05201	gi|160298209|ref|NP_034454.2|	gi|160298209|ref|NP_034454.2|	gi|160298209|ref|NP_034454.2|	QVEYLVNEK	QVEY(1)LVNEK	Y	4	373	373	NaN	-0.24865	0.175609	0.167898	-0.0421497	0.891234	NaN	1.04488	1	0.00439126	55.461	34.463	55.084	0.18966	2059900
Aspartate aminotransferase, mitochondrial	Got2	P05202	gi|6754036|ref|NP_034455.1|	gi|6754036|ref|NP_034455.1|	gi|6754036|ref|NP_034455.1|	NLDKEYLPIGGLAEFCK	NLDKEY(1)LPIGGLAEFCK	Y	6	96	96	1.12513	1.11475	0.754576	-0.665544	-0.00962436	-0.175238	NaN	-0.951609	1	3.92e-05	58.246	48.772	46.892	1.0045	13238000
Glycogen synthase kinase-3 beta	Gsk3b	Q9WV60	gi|568995944|ref|XP_006522489.1|	gi|568995944|ref|XP_006522489.1|	gi|568995944|ref|XP_006522489.1|;gi|9790077|ref|NP_062801.1|;gi|568995942|ref|XP_006522488.1|;gi|568946346|ref|XP_006540322.1|;gi|568946344|ref|XP_006540321.1|;gi|72384361|ref|NP_001026837.1|	QLVRGEPNVSYICSR	QLVRGEPNVS(0.013)Y(0.987)ICSR	Y	11	116;216;216;215;279;279	216	0.144196	1.00078	0.291961	-2.39825	-0.821262	0.583391	0.409614	0.309874	0.986555	8.51e-13	152.67	144.54	132.08	0.010385	2107100000
Glutathione S-transferase Mu 1	Gstm1	P10649	gi|6754084|ref|NP_034488.1|	gi|6754084|ref|NP_034488.1|	gi|6754084|ref|NP_034488.1|;gi|568921830|ref|XP_006501080.1|	MLLEYTDSSYDEKR	MLLEY(0.952)T(0.043)DS(0.003)S(0.001)Y(0.001)DEKR	Y	5	23;23	23	-0.718268	-0.61966	-0.324439	0.101992	0.0755058	0.525714	0.81837	1.05498	0.952019	0.00015384	55.724	50.512	55.724	0.23881	8098100
Guanylate kinase	Guk1	Q64520	gi|568971699|ref|XP_006532309.1|	gi|568971699|ref|XP_006532309.1|	gi|568971699|ref|XP_006532309.1|;gi|568971697|ref|XP_006532308.1|;gi|226874891|ref|NP_001152882.1|;gi|226874887|ref|NP_032219.2|	NPRPGEEDGKDYYFVTR	NPRPGEEDGKDY(0.771)Y(0.209)FVT(0.02)R	Y	12	53;53;62;74	53	1.57329	NaN	0.269994	-0.372279	0.00953069	NaN	-0.641952	-0.173631	0.770809	0.000220923	44.998	35.003	44.998	-0.069253	1587200
Glycogenin (Fragment)	Gyg	V9GX26	gi|7305121|ref|NP_038783.1|	gi|7305121|ref|NP_038783.1|	gi|7305121|ref|NP_038783.1|;gi|568920942|ref|XP_006535544.1|;gi|568920944|ref|XP_006535545.1|	WEQGQADYMGADSFDNIKR	WEQGQADY(0.999)MGADS(0.001)FDNIKR	Y	8	315;376;298	354	NaN	0.676102	0.916056	NaN	NaN	NaN	NaN	-1.09738	0.998848	0.00011984	41.513	31.822	41.513	-0.32972	651570
Glycogen [starch] synthase, muscle	Gys1	Q9Z1E4	gi|31560022|ref|NP_109603.2|	gi|31560022|ref|NP_109603.2|	gi|31560022|ref|NP_109603.2|	VGGIYTVLQTK	VGGIY(0.991)T(0.009)VLQTK	Y	5	44	44	-0.0479094	-0.120043	-0.28286	NaN	1.01626	0.343683	0.20629	0.419966	0.991244	1.37e-09	126.19	83.858	115	0.72754	7753600
Trifunctional enzyme subunit alpha, mitochondrial	Hadha	Q8BMS1	gi|33859811|ref|NP_849209.1|	gi|33859811|ref|NP_849209.1|	gi|33859811|ref|NP_849209.1|	FVDLYGAQK	FVDLY(1)GAQK	Y	5	724	724	-0.653361	-0.0287729	0.597057	-0.0303917	0.345675	0.564701	0.516934	-0.251655	1	5.65e-06	118.33	102.74	118.33	-0.28168	8222600
Alpha globin 1	Hba-a1	Q91VB8	gi|145301578|ref|NP_032244.2|	gi|145301578|ref|NP_032244.2|	gi|145301578|ref|NP_032244.2|;gi|145301549|ref|NP_001077424.1|	IGGHGAEYGAEALER	IGGHGAEY(1)GAEALER	Y	8	25;25	25	NaN	-0.0664543	0.37756	2.26284	1.43269	-0.290324	NaN	0.0267998	1	2.75e-19	154.72	31.937	88.282	0.77547	66609000
Alpha globin 1	Hba-a1	Q91VB8	gi|145301578|ref|NP_032244.2|	gi|145301578|ref|NP_032244.2|	gi|145301578|ref|NP_032244.2|;gi|145301549|ref|NP_001077424.1|	TYFPHFDVSHGSAQVK	T(0.157)Y(0.843)FPHFDVSHGSAQVK	Y	2	43;43	43	0.144196	NaN	0.296769	2.59542	2.26587	NaN	NaN	NaN	0.842885	0.000106189	65.374	43.708	65.374	-1.1347	6041000
Beta-globin	Hbb-bt	A8DUK4	gi|31982300|ref|NP_032246.2|;gi|498752597|ref|NP_001265090.1|	gi|31982300|ref|NP_032246.2|	gi|31982300|ref|NP_032246.2|;gi|319402143|ref|NP_001188320.1|;gi|17647499|ref|NP_058652.1|;CON__Q3SX09;CON__P02070;gi|498752597|ref|NP_001265090.1|	LLVVYPWTQR	LLVVY(1)PWTQR	Y	5	36;36;36;90;34;36	36	0.514033	0.215092	0.0453002	-1.27962	-0.776209	-0.858058	-0.341616	0.253669	0.999998	7.52e-07	137.98	137.98	129.85	0.24755	18356000
Hipk2 protein	Hipk2	Q5D0E9	gi|209862937|ref|NP_001129537.1|	gi|209862937|ref|NP_001129537.1|	gi|209862937|ref|NP_001129537.1|;gi|670357694|ref|NP_001288235.1|;gi|659066195|ref|NP_001281073.1|;gi|659066193|ref|NP_001281072.1|;gi|755503384|ref|XP_011238326.1|;gi|568940795|ref|XP_006505666.1|;gi|568940793|ref|XP_006505665.1|;gi|171543873|ref|NP_034563.2|;gi|669633295|ref|NP_001288233.1|;gi|158854012|ref|NP_034562.2|	AVCSTYLQSR	AVCST(0.014)Y(0.986)LQSR	Y	6	354;352;361;361;352;354;361;361;352;352	361	-0.0865419	0.286076	0.891621	-0.473585	2.7789	0.26639	NaN	NaN	0.985694	5.68e-07	140.16	129.41	140.16	-0.15224	47347000
Homeodomain-interacting protein kinase 3	Hipk3	Q9ERH7	gi|224922826|ref|NP_001139296.1|	gi|224922826|ref|NP_001139296.1|	gi|224922826|ref|NP_001139296.1|;gi|224922824|ref|NP_034564.2|	TVCSTYLQSR	TVCST(0.003)Y(0.997)LQSR	Y	6	359;359	359	-0.561948	-0.218972	0.502951	-0.0781156	2.41168	-0.272669	1.10806	0.389863	0.997194	4.51e-09	154.84	77.111	154.84	-0.12681	164440000
Histone H3.2	Hist1h3f	P84228	gi|7305139|ref|NP_038576.1|;gi|32880233|ref|NP_038578.2|;gi|82886797|ref|XP_894986.1|	gi|82886797|ref|XP_894986.1|	gi|7305139|ref|NP_038576.1|;gi|341572602|ref|NP_835734.2|;gi|30089712|ref|NP_783584.1|;gi|30061347|ref|NP_835587.1|;gi|30061341|ref|NP_835512.1|;gi|30061339|ref|NP_835510.1|;gi|30061337|ref|NP_835511.1|;gi|21489953|ref|NP_473386.1|;gi|32880233|ref|NP_038578.2|;gi|30061345|ref|NP_835514.1|;gi|30061343|ref|NP_835513.1|;gi|21489955|ref|NP_659539.1|;gi|124486606|ref|NP_001074488.1|;gi|966521996|ref|N…	YQKSTELLIR	Y(1)QKSTELLIR	Y	1	55;55;55;55;55;55;55;55;55;55;55;55;55;55;55;55;55;55	55	NaN	NaN	NaN	NaN	-0.131056	NaN	NaN	NaN	0.999961	0.00223362	64.82	42.827	64.82	1.1225	1119600
Histone H4	Hist1h4i	P62806	gi|46430493|ref|NP_783587.1|	gi|46430493|ref|NP_783587.1|	gi|46430493|ref|NP_783587.1|;gi|306482623|ref|NP_001182350.1|;gi|30089714|ref|NP_783585.1|;gi|30089708|ref|NP_783588.1|;gi|30061405|ref|NP_835500.1|;gi|30061403|ref|NP_835499.1|;gi|30061359|ref|NP_835583.1|;gi|30061355|ref|NP_783586.1|;gi|30061351|ref|NP_835582.1|;gi|30061349|ref|NP_835515.1|;gi|28316746|ref|NP_783583.1|;gi|23943922|ref|NP_694813.1|;gi|21361209|ref|NP_291074.1|	TVTAMDVVYALKR	TVTAMDVVY(1)ALKR	Y	9	89;89;89;89;89;89;89;89;89;89;89;89;89	89	0.169118	0.757842	-0.040633	-0.319419	0.657643	-0.696319	-0.168727	-0.0738634	1	2.27e-122	258.48	216.4	133.32	0.3489	206990000
Heat shock protein HSP 90-beta	Hsp90ab1	P11499	gi|40556608|ref|NP_032328.2|	gi|40556608|ref|NP_032328.2|	gi|40556608|ref|NP_032328.2|	HSQFIGYPITLYLEKER	HSQFIGYPIT(0.007)LY(0.993)LEKER	Y	12	216	216	NaN	NaN	NaN	NaN	-0.00962436	NaN	-0.311283	NaN	0.992502	0.000156412	101.05	94.619	101.05	0.28659	1725400
Heat shock cognate 71 kDa protein	Hspa8	P63017	gi|31981690|ref|NP_112442.2|	gi|31981690|ref|NP_112442.2|	gi|31981690|ref|NP_112442.2|	SKGPAVGIDLGTTYSCVGVFQHGK	SKGPAVGIDLGT(0.076)T(0.074)Y(0.777)S(0.074)CVGVFQHGK	Y	14	15	15	NaN	-0.120043	-0.671854	NaN	0.53781	NaN	0.678498	1.66633	0.776722	4.53e-08	72.21	68.569	56.681	0.43193	24106000
Heat shock cognate 71 kDa protein	Hspa8	P63017	gi|31981690|ref|NP_112442.2|	gi|31981690|ref|NP_112442.2|	gi|31981690|ref|NP_112442.2|	SFYPEEVSSMVLTK	S(0.013)FY(0.984)PEEVS(0.002)S(0.002)MVLTK	Y	3	115	115	NaN	NaN	NaN	NaN	NaN	-1.61295	-0.290673	-0.154218	0.983535	0.00134666	40.941	33.331	40.941	0.42141	948090
Heat shock cognate 71 kDa protein	Hspa8	P63017	gi|31981690|ref|NP_112442.2|	gi|31981690|ref|NP_112442.2|	gi|31981690|ref|NP_112442.2|	VQVEYKGETK	VQVEY(0.998)KGET(0.002)K	Y	5	107	107	0.233537	-0.215284	NaN	NaN	NaN	1.15351	2.53143	NaN	0.997942	0.000357243	85.29	69.957	85.29	-0.65281	2410800
10 kDa heat shock protein, mitochondrial	Hspe1	Q64433	gi|6680309|ref|NP_032329.1|	gi|6680309|ref|NP_032329.1|	gi|6680309|ref|NP_032329.1|	VLLPEYGGTK	VLLPEY(0.994)GGT(0.006)K	Y	6	76	76	-0.0130329	0.0704482	0.850468	1.54988	1.73432	NaN	0.660773	-0.0914834	0.993936	9.53e-07	123.79	91.472	123.79	-0.70881	13802000
Serine/threonine-protein kinase ICK	Ick	Q9JKV2	gi|568961767|ref|XP_006511368.1|	gi|568961767|ref|XP_006511368.1|	gi|568961767|ref|XP_006511368.1|;gi|568961765|ref|XP_006511367.1|;gi|255522773|ref|NP_001157252.1|;gi|255522770|ref|NP_064371.2|	SRPPYTDYVSTR	S(0.002)RPPY(0.023)T(0.976)DY(0.989)VS(0.006)T(0.005)R	Y	8	78;159;159;159	159	0.144196	0.98373	0.889208	NaN	NaN	NaN	0.822244	0.0853245	0.988755	0.00563391	48.899	37.523	48.899	0.05013	1296500
Isocitrate dehydrogenase [NADP], mitochondrial	Idh2	P54071	gi|225579033|ref|NP_766599.2|	gi|225579033|ref|NP_766599.2|	gi|225579033|ref|NP_766599.2|;gi|568947924|ref|XP_006540974.1|;gi|568947926|ref|XP_006540975.1|	HAHGDQYKATDFVVDR	HAHGDQY(0.991)KAT(0.009)DFVVDR	Y	7	179;179;179	179	0.144196	0.741546	NaN	NaN	NaN	0.453201	-0.384772	-0.40176	0.991076	0.000117574	51.03	48.556	51.03	0.65018	3074000
Isocitrate dehydrogenase [NADP], mitochondrial	Idh2	P54071	gi|225579033|ref|NP_766599.2|	gi|225579033|ref|NP_766599.2|	gi|225579033|ref|NP_766599.2|;gi|568947924|ref|XP_006540974.1|	WPLYLSTK	WPLY(0.979)LS(0.015)T(0.006)K	Y	4	247;247	247	NaN	1.10836	1.03552	-0.821638	-0.681478	-0.67096	-1.18047	-0.485837	0.97928	0.00700155	55.898	47.715	55.898	-0.22125	10574000
Interferon-induced transmembrane protein 3	Ifitm3	Q9CQW9	gi|21539593|ref|NP_079654.1|	gi|21539593|ref|NP_079654.1|	gi|21539593|ref|NP_079654.1|	IKEEYEVAEMGAPHGSASVR	IKEEY(1)EVAEMGAPHGSASVR	Y	5	27	27	0.144196	1.49788	-0.573013	-0.354964	NaN	-0.0377183	-0.103928	-0.212118	1	1.23e-05	102.43	95.951	102.43	0.55918	13721000
Insulin-like growth factor 1 receptor	Igf1r	Q60751	gi|1039777320|ref|XP_017177475.1|	gi|1039777320|ref|XP_017177475.1|	gi|1039777320|ref|XP_017177475.1|;gi|568947367|ref|XP_006540708.1|;gi|568947365|ref|XP_006540707.1|;gi|112983656|ref|NP_034643.2|;gi|568947363|ref|XP_006540706.1|;gi|568953124|ref|XP_006508764.1|;gi|157057178|ref|NP_034698.2|;gi|568953122|ref|XP_006508763.1|;gi|568953120|ref|XP_006508762.1|;gi|568947361|ref|XP_006540705.1|;gi|568947359|ref|XP_006540704.1|	DIYETDYYRK	DIY(1)ETDYYRK	Y	3	892;967;999;1163;1164;1174;1175;1186;1187;1194;1195	1163	0.202509	-0.0930208	0.170868	NaN	NaN	-0.73495	0.197166	0.265338	0.999827	0.00169307	76.228	63.96	76.228	-0.58763	3878300
Insulin-like growth factor 1 receptor	Igf1r	Q60751	gi|1039777320|ref|XP_017177475.1|	gi|1039777320|ref|XP_017177475.1|	gi|1039777320|ref|XP_017177475.1|;gi|568947367|ref|XP_006540708.1|;gi|568947365|ref|XP_006540707.1|;gi|112983656|ref|NP_034643.2|;gi|568947363|ref|XP_006540706.1|;gi|568953124|ref|XP_006508764.1|;gi|157057178|ref|NP_034698.2|;gi|568953122|ref|XP_006508763.1|;gi|568953120|ref|XP_006508762.1|;gi|568947361|ref|XP_006540705.1|;gi|568947359|ref|XP_006540704.1|	DIYETDYYRK	DIY(0.002)ET(0.039)DY(0.815)Y(0.144)RK	Y	7	896;971;1003;1167;1168;1178;1179;1190;1191;1198;1199	1167	NaN	-0.120043	NaN	1.05268	NaN	-0.68737	0.638562	0.0874559	0.81507	0.0420267	41.399	34.27	41.399	1.5193	2904700
MICOS complex subunit Mic60	Immt	Q8CAQ8	gi|358439544|ref|NP_001240617.1|	gi|358439544|ref|NP_001240617.1|	gi|358439544|ref|NP_001240617.1|;gi|1039776046|ref|XP_017177317.1|;gi|1039776044|ref|XP_017177316.1|;gi|1039776040|ref|XP_017177314.1|;gi|1039776038|ref|XP_017177313.1|;gi|358439483|ref|NP_001240610.1|;gi|70608131|ref|NP_083949.2|;gi|358439536|ref|NP_001240616.1|;gi|1039776042|ref|XP_017177315.1|;gi|358439528|ref|NP_001240615.1|;gi|1039776036|ref|XP_017177312.1|	FYAVQK	FY(1)AVQK	Y	2	557;591;592;603;623;624;635;587;598;619;630	635	-0.404307	0.946447	-0.24667	0.573842	-0.00962436	0.863844	0.106426	-0.417474	1	0.00021656	150.77	72.612	150.77	-0.0097816	5895400
MICOS complex subunit Mic60	Immt	Q8CAQ8	gi|358439544|ref|NP_001240617.1|	gi|358439544|ref|NP_001240617.1|	gi|358439544|ref|NP_001240617.1|;gi|1039776046|ref|XP_017177317.1|;gi|1039776044|ref|XP_017177316.1|;gi|1039776040|ref|XP_017177314.1|;gi|1039776038|ref|XP_017177313.1|;gi|358439483|ref|NP_001240610.1|;gi|70608131|ref|NP_083949.2|;gi|358439536|ref|NP_001240616.1|;gi|1039776042|ref|XP_017177315.1|;gi|358439528|ref|NP_001240615.1|;gi|1039776036|ref|XP_017177312.1|	GVYSEETLR	GVY(1)SEETLR	Y	3	547;581;582;593;613;614;625;577;588;609;620	625	-0.772313	-0.120043	-0.150409	-0.137425	0.404848	0.230736	0.457261	0.726883	0.999936	4.57e-08	148.52	78.698	148.52	0.26809	28822000
MICOS complex subunit Mic60	Immt	Q8CAQ8	gi|358439544|ref|NP_001240617.1|	gi|358439544|ref|NP_001240617.1|	gi|358439544|ref|NP_001240617.1|;gi|1039776046|ref|XP_017177317.1|;gi|1039776044|ref|XP_017177316.1|;gi|1039776040|ref|XP_017177314.1|;gi|1039776038|ref|XP_017177313.1|;gi|358439483|ref|NP_001240610.1|;gi|70608131|ref|NP_083949.2|;gi|358439536|ref|NP_001240616.1|;gi|1039776042|ref|XP_017177315.1|;gi|358439528|ref|NP_001240615.1|;gi|1039776036|ref|XP_017177312.1|	LLSYASYCIEHGDLELAAK	LLS(0.028)Y(0.021)AS(0.247)Y(0.704)CIEHGDLELAAK	Y	7	617;651;652;663;683;684;695;647;658;679;690	695	NaN	0.810742	NaN	-1.44521	-3.77589	NaN	-0.0811289	NaN	0.704139	2.72e-05	54.253	44.501	54.253	0.84375	13503000
Phosphatidylinositol 3,4,5-trisphosphate 5-phosphatase 1	Inpp5d	Q9ES52	gi|568908173|ref|XP_006529217.1|	gi|568908173|ref|XP_006529217.1|	gi|568908173|ref|XP_006529217.1|;gi|568908169|ref|XP_006529215.1|;gi|158854003|ref|NP_001103663.1|;gi|568908167|ref|XP_006529214.1|;gi|158854001|ref|NP_001103662.1|;gi|158853999|ref|NP_034696.2|;gi|568908165|ref|XP_006529213.1|;gi|568908163|ref|XP_006529212.1|	EKLYDFVK	EKLY(1)DFVK	Y	4	315;873;868;873;867;868;872;873	868	0.846643	-0.120043	0.162839	NaN	NaN	NaN	1.24952	0.127724	1	0.0141406	52.716	26.332	52.716	0.12726	2011400
Phosphatidylinositol 3,4,5-trisphosphate 5-phosphatase 2	Inppl1	Q6P549	gi|568949725|ref|XP_006507455.1|	gi|568949725|ref|XP_006507455.1|	gi|568949725|ref|XP_006507455.1|;gi|755522154|ref|XP_011239984.1|;gi|568949723|ref|XP_006507454.1|;gi|170172577|ref|NP_001116211.1|;gi|170172575|ref|NP_034697.2|;gi|1039777339|ref|XP_017177480.1|	ERLYEWISIDKDDTGAK	ERLY(1)EWISIDKDDTGAK	Y	4	887;887;887;887;887;887	887	0.5691	NaN	0.311155	0.639038	NaN	NaN	0.837506	NaN	0.999856	0.000161615	70.783	63.833	70.783	-1.022	3903000
Isochorismatase domain-containing protein 1	Isoc1	Q91V64	gi|31541909|ref|NP_079754.2|	gi|31541909|ref|NP_079754.2|	gi|31541909|ref|NP_079754.2|	ILGIPVIITEQYPK	ILGIPVIITEQY(1)PK	Y	12	159	159	NaN	-0.120043	NaN	NaN	-0.533921	0.829195	0.170526	NaN	0.999867	1.88e-05	88.075	81.389	88.075	-0.23295	12489000
Tyrosine-protein kinase JAK2	Jak2	Q62120	gi|569006477|ref|XP_006526778.1|	gi|569006477|ref|XP_006526778.1|	gi|569006477|ref|XP_006526778.1|;gi|1039757207|ref|XP_017173557.1|;gi|569006475|ref|XP_006526777.1|;gi|755562827|ref|XP_011245457.1|;gi|114326480|ref|NP_032439.2|;gi|114326478|ref|NP_001041642.1|	REVGDYGQLHK	REVGDY(1)GQLHK	Y	6	570;165;374;570;570;570	570	-0.0986591	0.898478	-0.242368	2.1874	NaN	0.273702	0.61463	-0.0349145	1	2.52e-10	134.99	120.3	52.247	-0.52409	29003000
Junction plakoglobin	Jup	Q02257	gi|568971843|ref|XP_006532379.1|	gi|568971843|ref|XP_006532379.1|	gi|568971843|ref|XP_006532379.1|;gi|568971841|ref|XP_006532378.1|;gi|28395018|ref|NP_034723.1|	LNYGIPAIVK	LNY(1)GIPAIVK	Y	3	480;480;480	480	0.144196	0.970684	NaN	-0.315822	-0.0382208	-0.16159	-0.696558	-0.323513	1	0.00055355	79.148	69.493	79.148	0.18812	2714500
Junction plakoglobin	Jup	Q02257	gi|568971843|ref|XP_006532379.1|	gi|568971843|ref|XP_006532379.1|	gi|568971843|ref|XP_006532379.1|;gi|568971841|ref|XP_006532378.1|;gi|28395018|ref|NP_034723.1|	NEGTATYAAAVLFR	NEGTAT(0.156)Y(0.844)AAAVLFR	Y	7	644;644;644	644	0.144196	0.785171	NaN	NaN	NaN	-0.581695	-0.341374	-0.243058	0.844052	1.41e-05	105.03	92.398	105.03	-0.72933	4155300
Vascular endothelial growth factor receptor 2	Kdr	P35918	gi|755512111|ref|XP_011239119.1|	gi|755512111|ref|XP_011239119.1|	gi|755512111|ref|XP_011239119.1|;gi|27777648|ref|NP_034742.2|	FHYDNTAGISHYLQNSK	FHY(0.999)DNT(0.001)AGISHYLQNSK	Y	3	1020;1212	1212	NaN	NaN	-0.101146	2.43853	2.89434	-0.925227	-0.604177	-0.460343	0.999368	2.49e-50	180.7	168.9	180.7	-0.12656	4410100
L-2-hydroxyglutarate dehydrogenase, mitochondrial	L2hgdh	Q91YP0	gi|21703884|ref|NP_663418.1|	gi|21703884|ref|NP_663418.1|	gi|21703884|ref|NP_663418.1|	YVVTCAGLYSDR	Y(0.999)VVT(0.001)CAGLYSDR	Y	1	255	255	NaN	NaN	NaN	NaN	-0.00962436	NaN	NaN	NaN	0.998754	0.00696767	40.475	26.667	40.475	2.9877	361100
LIM domain-binding protein 3	Ldb3	Q9JKS4	gi|84872213|ref|NP_001034160.1|	gi|84872213|ref|NP_001034160.1|	gi|84872213|ref|NP_001034160.1|;gi|84872211|ref|NP_036048.3|;gi|1039746171|ref|XP_017171508.1|;gi|568987690|ref|XP_006519081.1|;gi|84872219|ref|NP_001034162.1|;gi|84875544|ref|NP_001034161.1|;gi|84872215|ref|NP_001034163.1|;gi|568987688|ref|XP_006519080.1|	KPFGNSLFHMEDGEPYCEKDYINLFSTK	KPFGNSLFHMEDGEPY(0.004)CEKDY(0.989)INLFS(0.005)T(0.002)K	Y	21	595;657;657;551;556;613;618;618	657	NaN	0.583818	-0.513904	-0.436194	NaN	NaN	NaN	NaN	0.988835	8.27e-11	66.365	63.663	66.365	-0.22628	12253000
LIM domain-binding protein 3	Ldb3	Q9JKS4	gi|84872213|ref|NP_001034160.1|;gi|84872221|ref|NP_001034165.1|	gi|84872213|ref|NP_001034160.1|	gi|84872213|ref|NP_001034160.1|;gi|84872211|ref|NP_036048.3|;gi|1039746171|ref|XP_017171508.1|;gi|568987690|ref|XP_006519081.1|;gi|84872219|ref|NP_001034162.1|;gi|84875544|ref|NP_001034161.1|;gi|84872215|ref|NP_001034163.1|;gi|568987688|ref|XP_006519080.1|;gi|84872221|ref|NP_001034165.1|;gi|568987692|ref|XP_006519082.1|;gi|84872217|ref|NP_001034164.1|	SASYNLSLTLQK	S(0.01)AS(0.203)Y(0.774)NLS(0.013)LT(0.001)LQK	Y	4	74;74;74;74;74;74;74;74;74;74;74	74	NaN	NaN	NaN	-0.994875	-0.66789	NaN	NaN	NaN	0.773702	0.00163238	47.062	35.598	47.062	-0.38413	2104100
L-lactate dehydrogenase B chain	Ldhb	P16125	gi|6678674|ref|NP_032518.1|	gi|6678674|ref|NP_032518.1|	gi|6678674|ref|NP_032518.1|;gi|938085832|ref|NP_001303251.1|	MVVDSAYEVIK	MVVDS(0.006)AY(0.994)EVIK	Y	7	240;240	240	0.0778217	-0.120043	NaN	0.583869	0.891918	1.11747	NaN	NaN	0.993859	0.000665232	64.121	53.891	64.121	0.77607	8852800
Leiomodin-2	Lmod2	Q3UHZ5	gi|74315957|ref|NP_444328.1|	gi|74315957|ref|NP_444328.1|	gi|74315957|ref|NP_444328.1|	GTPGSSPYASPR	GTPGSS(0.01)PY(0.734)AS(0.256)PR	Y	8	397	397	-0.413146	0.423496	0.916056	NaN	NaN	0.762842	1.30519	-0.195176	0.733688	0.000217175	74.392	59.381	74.392	0.22421	4376400
Leucine-rich repeat flightless-interacting protein 2	Lrrfip2	Q91WK0	gi|755532275|ref|XP_011241324.1|	gi|755532275|ref|XP_011241324.1|	gi|755532275|ref|XP_011241324.1|;gi|755532283|ref|XP_011241328.1|;gi|1039794200|ref|XP_017169079.1|;gi|1039794198|ref|XP_017169078.1|;gi|755532255|ref|XP_011241314.1|;gi|755532253|ref|XP_011241313.1|;gi|755532251|ref|XP_011241312.1|;gi|755532245|ref|XP_011241309.1|;gi|755532241|ref|XP_011241307.1|;gi|755532239|ref|XP_011241306.1|;gi|755532235|ref|XP_011241304.1|;gi|755532233|ref|XP_011241303.1|;g…	TPSEYSYYSSR	TPSEY(0.002)S(0.157)Y(0.65)Y(0.11)S(0.027)S(0.055)R	Y	7	249;197;249;249;249;197;212;217;249;249;234;249;249	NA	-0.481681	-0.541743	-0.0998578	0.371646	0.204823	-0.410708	0.486603	0.577748	0.650157	1.51e-05	111.63	91.989	111.63	-0.17045	11042000
Ly6g6f protein	Ly6g6f	B2RXM6	gi|253683539|ref|NP_001156664.1|	gi|253683539|ref|NP_001156664.1|	gi|253683539|ref|NP_001156664.1|;gi|569000929|ref|XP_006524649.1|	DREPSVPHFKPEVQVYENIHLAR	DREPS(0.001)VPHFKPEVQVY(0.999)ENIHLAR	Y	16	284;340	284	0.144196	NaN	-0.556024	-0.460217	NaN	NaN	0.9674	NaN	0.999336	2.32e-05	40.622	31.242	40.622	-0.47642	2880600
Tyrosine-protein kinase Lyn	Lyn	P25911	gi|755506082|ref|XP_011248241.1|	gi|755506082|ref|XP_011248241.1|	gi|755506082|ref|XP_011248241.1|;gi|161760634|ref|NP_034877.2|;gi|161760636|ref|NP_001104566.1|;gi|1039769130|ref|XP_017175960.1|;gi|31982490|ref|NP_031575.2|	SLDNGGYYISPR	SLDNGGY(0.854)Y(0.146)ISPR	Y	7	104;172;193;149;181	193	-0.371673	-0.120043	-0.420442	NaN	0.585207	0.0114365	-0.147981	NaN	0.854034	2.67e-07	116.24	102.43	116.24	-0.057616	4524200
Tyrosine-protein kinase Lyn	Lyn	P25911	gi|755506082|ref|XP_011248241.1|	gi|755506082|ref|XP_011248241.1|	gi|755506082|ref|XP_011248241.1|;gi|161760634|ref|NP_034877.2|;gi|161760636|ref|NP_001104566.1|	VIEDNEYTAR	VIEDNEY(0.806)T(0.194)AR	Y	7	308;376;397	397	NaN	0.430171	-0.974162	1.27644	NaN	NaN	0.5201	-0.137383	0.806336	9e-07	130.98	103.94	91.549	0.03079	11846000
ADP-ribose glycohydrolase MACROD1	Macrod1	Q922B1	gi|170650601|ref|NP_598908.2|	gi|170650601|ref|NP_598908.2|	gi|170650601|ref|NP_598908.2|;gi|569006165|ref|XP_006526626.1|;gi|569006163|ref|XP_006526625.1|	YVIHTVGPIAVGQPTASQAAELR	Y(0.826)VIHT(0.174)VGPIAVGQPTASQAAELR	Y	1	220;210;220	220	NaN	NaN	NaN	NaN	-0.00962436	NaN	NaN	NaN	0.826165	2.22e-07	77.221	74.42	77.221	-0.14207	1961000
Mitogen-activated protein kinase 1	Mapk1	P63085	gi|84579909|ref|NP_001033752.1|	gi|84579909|ref|NP_001033752.1|	gi|84579909|ref|NP_001033752.1|;gi|6754632|ref|NP_036079.1|;gi|568995370|ref|XP_006522210.1|	VADPDHDHTGFLTEYVATR	VADPDHDHTGFLT(1)EY(0.999)VAT(0.001)R	Y	15	185;185;185	185	0.434519	0.679618	0.347087	2.27238	2.7285	NaN	-0.498933	NaN	0.998888	6.4e-29	161.35	145.04	118.51	-0.26375	240320000
Mitogen-activated protein kinase 10	Mapk10	Q61831	gi|893558721|ref|NP_001297615.1|	gi|893558721|ref|NP_001297615.1|	gi|893558721|ref|NP_001297615.1|;gi|882939001|ref|NP_001297381.1|;gi|7710060|ref|NP_057909.1|;gi|568987718|ref|XP_006519095.1|;gi|1039771581|ref|XP_017176380.1|;gi|1039771579|ref|XP_017176379.1|;gi|755512474|ref|XP_011247752.1|;gi|970116789|ref|NP_001305060.1|;gi|568935655|ref|XP_006535013.1|;gi|125858511|ref|NP_033184.2|;gi|893552094|ref|NP_001297612.1|;gi|1039771575|ref|XP_017176378.1|;gi|10397…	TAGTSFMMTPYVVTR	TAGTSFMMT(0.025)PY(0.932)VVT(0.043)R	Y	11	185;185;185;185;185;185;149;223;223;223;185;185;185;185;185;223;223;223;223	223	NaN	-0.16366	-0.264271	0.379423	0.42315	-1.56751	-0.656487	-0.111882	0.932248	5.66e-05	109.83	101.49	109.83	-0.48853	48284000
Mitogen-activated protein kinase 12	Mapk12	O08911	gi|568992632|ref|XP_006521123.1|	gi|568992632|ref|XP_006521123.1|	gi|568992632|ref|XP_006521123.1|;gi|7305253|ref|NP_038899.1|;gi|568992630|ref|XP_006521122.1|;gi|568992628|ref|XP_006521121.1|	QADSEMTGYVVTR	QADS(0.002)EMT(0.048)GY(0.941)VVT(0.01)R	Y	9	169;185;169;185	185	-0.88355	0.345597	0.290407	0.893579	1.83793	-1.40018	0.476568	NaN	0.940935	4.33e-13	140.31	118.76	85.837	0.019786	13412000
Mitogen-activated protein kinase 14	Mapk14	P47811	gi|270341386|ref|NP_001161986.1|	gi|270341386|ref|NP_001161986.1|	gi|270341386|ref|NP_001161986.1|;gi|270341381|ref|NP_001161985.1|;gi|1039753601|ref|XP_017172969.1|;gi|270341370|ref|NP_001161980.1|;gi|10092590|ref|NP_036081.1|	HTDDEMTGYVATR	HTDDEMTGY(1)VATR	Y	9	105;105;105;182;182	182	-1.0185	1.00889	-7.52482	1.158	3.97419	0.833144	1.42213	-0.11161	0.999988	2.47e-122	255.15	241.38	255.15	0.43624	337890000
Mitogen-activated protein kinase 3	Mapk3	Q63844	gi|21489933|ref|NP_036082.1|	gi|21489933|ref|NP_036082.1|	gi|21489933|ref|NP_036082.1|	IADPEHDHTGFLTEYVATR	IADPEHDHT(0.001)GFLT(0.999)EY(0.994)VAT(0.007)R	Y	15	205	205	-0.209766	-0.120043	1.32351	1.8615	1.82397	0.530087	0.684471	-1.66577	0.99367	2.77e-05	97.5	84.829	97.5	0.075551	307380000
Mitogen-activated protein kinase 9	Mapk9	Q9WTU6	gi|8393749|ref|NP_058657.1|	gi|8393749|ref|NP_058657.1|	gi|8393749|ref|NP_058657.1|;gi|254750739|ref|NP_001157144.1|;gi|1039737258|ref|XP_017170052.1|;gi|1039737256|ref|XP_017170051.1|;gi|254750733|ref|NP_001157143.1|;gi|254750709|ref|NP_997575.2|	TACTNFMMTPYVVTR	TACTNFMMT(0.002)PY(0.89)VVT(0.108)R	Y	11	185;185;159;159;185;185	185	0.179027	NaN	0.0696317	NaN	1.05216	NaN	NaN	NaN	0.890158	6.13e-05	100.13	93.871	93.909	-0.82177	15845000
Malate dehydrogenase, cytoplasmic	Mdh1	P14152	gi|254540027|ref|NP_032644.3|	gi|254540027|ref|NP_032644.3|	gi|254540027|ref|NP_032644.3|;gi|939977622|ref|NP_001303604.1|	SQGTALEKYAK	SQGTALEKY(1)AK	Y	9	119;119	119	-1.73969	0.210612	NaN	0.649965	3.27375	NaN	NaN	-0.44269	1	2.48e-06	116.74	103.78	116.74	0.40562	13489000
Afadin	Mllt4	Q9QZQ1	gi|568999235|ref|XP_006523827.1|;gi|145587092|ref|NP_034936.1|	gi|145587092|ref|NP_034936.1|	gi|568999235|ref|XP_006523827.1|;gi|568999241|ref|XP_006523829.1|;gi|568999233|ref|XP_006523826.1|;gi|568999227|ref|XP_006523823.1|;gi|568999225|ref|XP_006523822.1|;gi|1039752815|ref|XP_017172764.1|;gi|568999221|ref|XP_006523820.1|;gi|568999217|ref|XP_006523818.1|;gi|568999215|ref|XP_006523817.1|;gi|568999211|ref|XP_006523815.1|;gi|145587092|ref|NP_034936.1|;gi|568999237|ref|XP_006523828.1|;gi|56…	EYFTFPASK	EY(1)FTFPASK	Y	2	1238;1231;1238;1223;1238;1230;1231;1238;1237;1238;1230;1237;1214;1214;1229;1230;1236;1237	1230	NaN	NaN	NaN	-1.03243	-0.590097	NaN	NaN	NaN	0.999999	0.000738769	85.29	75.025	85.29	-0.41069	3721800
Afadin	Mllt4	Q9QZQ1	gi|145587092|ref|NP_034936.1|	gi|145587092|ref|NP_034936.1|	gi|145587092|ref|NP_034936.1|;gi|568999237|ref|XP_006523828.1|;gi|568999243|ref|XP_006523830.1|;gi|568999231|ref|XP_006523825.1|;gi|1039752817|ref|XP_017172765.1|;gi|568999223|ref|XP_006523821.1|;gi|568999219|ref|XP_006523819.1|;gi|568999213|ref|XP_006523816.1|	YSLYEVHVSGER	YSLY(1)EVHVSGER	Y	4	94;94;94;94;94;94;94;94	94	0.183096	0.0901152	-0.483421	0.0495943	-0.0496017	0.16378	-0.488047	-0.857188	0.999996	1.07e-07	121.02	93.54	121.02	0.82241	4853300
Mitochondrial pyruvate carrier	Mpc1	Q9D6B6	gi|9055178|ref|NP_061289.1|	gi|9055178|ref|NP_061289.1|	gi|9055178|ref|NP_061289.1|;gi|755555583|ref|XP_011244521.1|	LINYEMSK	LINY(1)EMSK	Y	4	101;78	159	NaN	NaN	-0.245744	NaN	NaN	-0.0304691	-0.0217143	0.230087	0.999998	8.19e-05	123.72	75.159	123.72	-0.12465	3265800
Myosin-binding protein C, cardiac-type	Mybpc3	O70468	gi|568915712|ref|XP_006498945.1|	gi|568915712|ref|XP_006498945.1|	gi|568915712|ref|XP_006498945.1|;gi|755498872|ref|XP_011237643.1|;gi|134031947|ref|NP_032679.2|	KLEPAYQVNK	KLEPAY(1)QVNK	Y	6	376;377;377	369	0.144196	1.33952	0.568252	0.855186	NaN	1.50511	0.582363	NaN	1	1.71e-05	116.55	89.118	60.398	0.26967	5797300
Myosin-binding protein C, cardiac-type	Mybpc3	O70468	gi|568915712|ref|XP_006498945.1|	gi|568915712|ref|XP_006498945.1|	gi|568915712|ref|XP_006498945.1|;gi|755498872|ref|XP_011237643.1|;gi|134031947|ref|NP_032679.2|	KLEVYQSIADLAVGAK	KLEVY(1)QSIADLAVGAK	Y	5	551;552;552	544	0.144196	0.272493	-0.432466	-0.509419	-0.511208	-0.0134382	-0.743277	0.262767	0.999967	1.4e-36	174.78	155.96	164.41	-0.14308	141240000
Myosin-binding protein C, cardiac-type	Mybpc3	O70468	gi|568915712|ref|XP_006498945.1|	gi|568915712|ref|XP_006498945.1|	gi|568915712|ref|XP_006498945.1|;gi|755498872|ref|XP_011237643.1|;gi|134031947|ref|NP_032679.2|	VGQHLQLHDSYDR	VGQHLQLHDS(0.186)Y(0.814)DR	Y	11	219;219;219	211	0.472272	0.640994	-0.830188	-0.393986	NaN	NaN	-0.693087	-0.154218	0.813559	0.000226296	63.966	55.922	63.966	-0.13707	4828900
Myosin-6	Myh6	Q02566	gi|6754774|ref|NP_034986.1|	gi|6754774|ref|NP_034986.1|	gi|6754774|ref|NP_034986.1|;gi|255918225|ref|NP_001157643.1|;gi|568986973|ref|XP_006518741.1|;gi|568986971|ref|XP_006518740.1|	ELTYQTEEDKK	ELTY(1)QTEEDKK	Y	4	1854;1854;1854;1854	1854	-0.0794482	-0.526786	-0.360113	1.00289	2.77759	NaN	NaN	0.952653	0.999944	6.57e-23	179.57	111.02	179.57	-1.0043	85868000
Myosin-6	Myh6	Q02566	gi|6754774|ref|NP_034986.1|	gi|6754774|ref|NP_034986.1|	gi|6754774|ref|NP_034986.1|;gi|255918225|ref|NP_001157643.1|;gi|568986973|ref|XP_006518741.1|;gi|568986971|ref|XP_006518740.1|	HDCDLLREQYEEEMEAK	HDCDLLREQY(1)EEEMEAK	Y	10	1349;1349;1349;1349	1349	-1.07432	-0.242646	0.577072	NaN	NaN	2.09912	1.55431	1.30634	1	4.86e-05	63.073	45.015	60.489	-0.36294	9918200
Myosin-6	Myh6	Q02566	gi|6754774|ref|NP_034986.1|	gi|6754774|ref|NP_034986.1|	gi|6754774|ref|NP_034986.1|;gi|255918225|ref|NP_001157643.1|;gi|568986973|ref|XP_006518741.1|;gi|568986971|ref|XP_006518740.1|	LSYTQQMEDLKR	LSY(1)TQQMEDLKR	Y	3	1310;1310;1310;1310	1310	0.144196	2.28464	-0.248173	0.962155	NaN	2.63515	0.391401	1.26371	1	1.86e-67	225.15	207.45	221.09	-0.18609	563910000
Myosin-6	Myh6	Q02566	gi|6754774|ref|NP_034986.1|	gi|6754774|ref|NP_034986.1|	gi|6754774|ref|NP_034986.1|;gi|255918225|ref|NP_001157643.1|;gi|568986973|ref|XP_006518741.1|;gi|568986971|ref|XP_006518740.1|	GQSVQQVYYSIGALAK	GQSVQQVY(0.147)Y(0.674)S(0.18)IGALAK	Y	9	423;423;423;423	423	NaN	-0.825916	-0.450837	NaN	NaN	-0.33263	-0.0126834	0.06797	0.673676	9.02e-05	86.952	74.112	76.82	-0.72979	13352000
Myosin-6	Myh6	Q02566	gi|6754774|ref|NP_034986.1|	gi|6754774|ref|NP_034986.1|	gi|6754774|ref|NP_034986.1|;gi|255918225|ref|NP_001157643.1|;gi|568986973|ref|XP_006518741.1|;gi|568986971|ref|XP_006518740.1|	TDAQMADFGAAAQYLRK	TDAQMADFGAAAQY(1)LRK	Y	14	15;15;15;15	15	NaN	-0.291092	-0.128078	-0.0681494	-0.173773	-0.50219	-0.445685	0.0882912	1	9.64e-14	144.29	133.43	83.54	-0.097949	14326000
Myosin-6	Myh6	Q02566	gi|6754774|ref|NP_034986.1|	gi|6754774|ref|NP_034986.1|	gi|6754774|ref|NP_034986.1|;gi|255918225|ref|NP_001157643.1|;gi|568986973|ref|XP_006518741.1|;gi|568986971|ref|XP_006518740.1|	TLEDQANEYRVKLEEAQR	TLEDQANEY(1)RVKLEEAQR	Y	9	1261;1261;1261;1261	1261	-1.28952	-0.37949	-0.770253	1.28033	0.941002	1.3706	0.146199	0.583575	1	1.44e-17	169.93	145.68	106.93	-0.36166	284580000
Myosin-7	Myh7	Q91Z83	gi|18859641|ref|NP_542766.1|	gi|18859641|ref|NP_542766.1|	gi|18859641|ref|NP_542766.1|;gi|1039745485|ref|XP_017171331.1|;gi|1039745483|ref|XP_017171330.1|	GKLTYTQQLEDLKR	GKLTY(1)TQQLEDLKR	Y	5	1308;1308;1308	1308	0.976508	2.80266	NaN	-0.939733	-0.528635	-1.78587	0.441641	0.226677	0.999597	6.14e-61	204.28	180.82	204.28	-0.37063	21394000
Myosin-7	Myh7	Q91Z83	gi|18859641|ref|NP_542766.1|	gi|18859641|ref|NP_542766.1|	gi|18859641|ref|NP_542766.1|;gi|1039745485|ref|XP_017171331.1|;gi|1039745483|ref|XP_017171330.1|	IKELTYQTEEDRK	IKELT(0.012)Y(0.988)QTEEDRK	Y	6	1852;1852;1852	1852	1.42488	2.72004	0.90184	NaN	NaN	-0.67096	1.90951	NaN	0.988478	8.39e-07	120.87	96.938	120.87	-0.39381	5601800
Myosin-7	Myh7	Q91Z83	gi|18859641|ref|NP_542766.1|;gi|6754774|ref|NP_034986.1|	gi|6754774|ref|NP_034986.1|	gi|18859641|ref|NP_542766.1|;gi|1039745485|ref|XP_017171331.1|;gi|1039745483|ref|XP_017171330.1|;gi|6754774|ref|NP_034986.1|;gi|255918225|ref|NP_001157643.1|;gi|568986973|ref|XP_006518741.1|;gi|568986971|ref|XP_006518740.1|	ILYGDFR	ILY(1)GDFR	Y	3	715;715;715;717;717;717;717	715	NaN	NaN	NaN	0.417373	-0.260074	NaN	NaN	NaN	1	0.000132874	117.16	56.802	117.16	0.60144	1758000
Myosin-7	Myh7	Q91Z83	gi|18859641|ref|NP_542766.1|;gi|6754774|ref|NP_034986.1|	gi|6754774|ref|NP_034986.1|	gi|18859641|ref|NP_542766.1|;gi|1039745485|ref|XP_017171331.1|;gi|1039745483|ref|XP_017171330.1|;gi|6754774|ref|NP_034986.1|;gi|255918225|ref|NP_001157643.1|;gi|568986973|ref|XP_006518741.1|;gi|568986971|ref|XP_006518740.1|	LKNAYEESLEHLETFKR	LKNAY(1)EESLEHLETFKR	Y	5	1488;1488;1488;1490;1490;1490;1490	1488	-0.830662	-0.583139	-0.420081	0.289538	0.267374	0.621658	-0.330254	-0.838077	0.999998	9.18e-06	120.63	110.25	120.63	-0.40269	38491000
Myosin-7	Myh7	Q91Z83	gi|18859641|ref|NP_542766.1|;gi|6754774|ref|NP_034986.1|	gi|6754774|ref|NP_034986.1|	gi|18859641|ref|NP_542766.1|;gi|1039745485|ref|XP_017171331.1|;gi|1039745483|ref|XP_017171330.1|;gi|6754774|ref|NP_034986.1|;gi|255918225|ref|NP_001157643.1|;gi|568986973|ref|XP_006518741.1|;gi|568986971|ref|XP_006518740.1|	YEESQSELESSQK	Y(1)EESQSELESSQK	Y	1	1460;1460;1460;1462;1462;1462;1462	1460	0.124841	-0.360897	1.7261	0.0762616	NaN	2.22396	NaN	-6.15374	0.999995	2.61e-05	94.09	70.622	94.09	0.96323	30220000
Myosin-7	Myh7	Q91Z83	gi|18859641|ref|NP_542766.1|;gi|6754774|ref|NP_034986.1|	gi|6754774|ref|NP_034986.1|	gi|18859641|ref|NP_542766.1|;gi|1039745485|ref|XP_017171331.1|;gi|1039745483|ref|XP_017171330.1|;gi|6754774|ref|NP_034986.1|;gi|255918225|ref|NP_001157643.1|;gi|568986973|ref|XP_006518741.1|;gi|568986971|ref|XP_006518740.1|	SAYLMGLNSADLLK	S(0.002)AY(0.998)LMGLNSADLLK	Y	3	386;386;386;387;387;387;387	386	0.0963402	-0.1042	0.0800874	0.0290759	-1.23373	-0.686979	0.19	0.424783	0.997966	5.82e-05	75.764	71.248	75.316	-0.6158	7527500
Myosin-7	Myh7	Q91Z83	gi|18859641|ref|NP_542766.1|;gi|568972041|ref|XP_006532475.1|;gi|6754774|ref|NP_034986.1|;gi|67189167|ref|NP_034985.2|	gi|6754774|ref|NP_034986.1|	gi|18859641|ref|NP_542766.1|;gi|1039745485|ref|XP_017171331.1|;gi|1039745483|ref|XP_017171330.1|;gi|568972041|ref|XP_006532475.1|;gi|153792649|ref|NP_001093105.1|;gi|6754774|ref|NP_034986.1|;gi|255918225|ref|NP_001157643.1|;gi|568986973|ref|XP_006518741.1|;gi|568986971|ref|XP_006518740.1|;gi|67189167|ref|NP_034985.2|	TKYETDAIQR	TKY(1)ETDAIQR	Y	3	1375;1375;1375;1376;1376;1377;1377;1377;1377;1379	1375	-0.405808	-0.116529	-0.551944	1.69108	0.891295	1.41211	1.13021	NaN	0.99996	8.48e-34	194.17	150.21	194.17	0.46828	90150000
Myosin-7	Myh7	Q91Z83	gi|18859641|ref|NP_542766.1|;gi|568972041|ref|XP_006532475.1|;gi|6754774|ref|NP_034986.1|;gi|67189167|ref|NP_034985.2|	gi|6754774|ref|NP_034986.1|	gi|18859641|ref|NP_542766.1|;gi|1039745485|ref|XP_017171331.1|;gi|1039745483|ref|XP_017171330.1|;gi|568972041|ref|XP_006532475.1|;gi|153792649|ref|NP_001093105.1|;gi|1039761690|ref|XP_017174699.1|;gi|1039761688|ref|XP_017174698.1|;gi|1039761685|ref|XP_017174697.1|;gi|568918124|ref|XP_006500110.1|;gi|1039761682|ref|XP_017174696.1|;gi|1039761680|ref|XP_017174695.1|;gi|145864471|ref|NP_001078847.1|;…	VGNEYVTK	VGNEY(1)VTK	Y	5	410;410;410;411;411;111;209;209;184;184;209;413;413;411;411;411;411;413	410	-0.272876	-0.120043	0.642745	1.49889	NaN	0.920887	0.579977	0.42688	0.999999	6.84e-07	150.17	108.52	150.17	0.35854	190730000
Myosin-9	Myh9	Q8VDD5	gi|114326446|ref|NP_071855.2|	gi|114326446|ref|NP_071855.2|	gi|114326446|ref|NP_071855.2|	ALELDSNLYR	ALELDS(0.035)NLY(0.965)R	Y	9	754	754	NaN	0.925232	0.916056	NaN	NaN	-1.22037	-0.404856	0.198969	0.965031	0.00761919	48.284	32.739	48.284	0.3276	681350
Myosin-9	Myh9	Q8VDD5	gi|114326446|ref|NP_071855.2|	gi|114326446|ref|NP_071855.2|	gi|114326446|ref|NP_071855.2|	VAAYDKLEK	VAAY(1)DKLEK	Y	4	1408	1408	0.310297	1.5196	0.411821	-0.856013	NaN	-0.67096	-0.22487	-1.2197	1	0.00425889	65.627	23.751	65.627	-1.3849	2667600
Myosin regulatory light chain 2, ventricular/cardiac muscle isoform	Myl2	P51667	gi|153791853|ref|NP_034991.3|	gi|153791853|ref|NP_034991.3|	gi|153791853|ref|NP_034991.3|;gi|568936906|ref|XP_006530249.1|	GSLKADYVR	GSLKADY(1)VR	Y	7	118;154	NA	-0.338375	0.206611	NaN	0.868756	0.311808	1.44314	NaN	-0.100738	1	9.16e-06	118.67	94.448	118.67	0.49575	60435000
Myosin light chain 3	Myl3	P09542	gi|33563264|ref|NP_034989.1|	gi|33563264|ref|NP_034989.1|	gi|33563264|ref|NP_034989.1|	NKDTGTYEDFVEGLR	NKDT(0.003)GT(0.009)Y(0.988)EDFVEGLR	Y	7	139	139	0.328829	0.313293	0.458436	0.18609	-0.243095	0.225756	-0.11125	-0.154218	0.988271	9.22e-05	58.079	53.174	58.079	0.58483	11423000
Myosin light chain 4	Myl4	P09541	gi|568972053|ref|XP_006532481.1|;gi|33563264|ref|NP_034989.1|	gi|33563264|ref|NP_034989.1|	gi|568972053|ref|XP_006532481.1|;gi|568972051|ref|XP_006532480.1|;gi|31981605|ref|NP_034988.2|;gi|755537611|ref|XP_011247091.1|;gi|33563264|ref|NP_034989.1|	ITYGQCGDVLR	ITY(1)GQCGDVLR	Y	3	71;71;71;83;82	71	-0.847204	-0.0194242	-0.163863	0.403072	0.532094	-0.119656	-0.234121	-0.260804	0.999998	1.34e-26	122.7	100.79	118.28	0.53861	17511000
Myomesin-1	Myom1	Q62234	gi|145279198|ref|NP_001077403.1|	gi|145279198|ref|NP_001077403.1|	gi|145279198|ref|NP_001077403.1|;gi|145279175|ref|NP_034997.2|	ETHIVWYKDER	ETHIVWY(1)KDER	Y	7	1276;1374	1374	-0.469888	0.0892536	0.263557	0.827094	NaN	NaN	0.930588	NaN	0.999978	0.000632828	60.255	52.89	60.255	0.24121	1090200
Myomesin-1	Myom1	Q62234	gi|145279198|ref|NP_001077403.1|	gi|145279198|ref|NP_001077403.1|	gi|145279198|ref|NP_001077403.1|;gi|145279175|ref|NP_034997.2|;gi|568999288|ref|XP_006523851.1|;gi|568999286|ref|XP_006523850.1|	IKEAAAYIAQK	IKEAAAY(1)IAQK	Y	7	176;176;176;176	176	-0.0963706	0.0860836	0.674664	NaN	NaN	1.08349	0.612846	0.407679	1	0.0052366	44.847	29.218	44.847	-0.73227	2606900
Myomesin-1	Myom1	Q62234	gi|145279198|ref|NP_001077403.1|	gi|145279198|ref|NP_001077403.1|	gi|145279198|ref|NP_001077403.1|;gi|145279175|ref|NP_034997.2|;gi|568999288|ref|XP_006523851.1|;gi|568999286|ref|XP_006523850.1|	SHQHYDLSYR	S(0.007)HQHY(0.992)DLSYR	Y	5	13;13;13;13	13	-0.0374004	1.61529	-0.131938	-0.157226	NaN	0.318937	-0.0246792	-0.523223	0.992108	0.00438403	48.284	39.874	48.284	-0.1085	1907400
Myomesin 2	Myom2	Q14BI5	gi|568953178|ref|XP_006508791.1|	gi|568953178|ref|XP_006508791.1|	gi|568953178|ref|XP_006508791.1|;gi|170763465|ref|NP_032690.2|;gi|568953176|ref|XP_006508790.1|	SLDLSGQAFDEAYAEFQQLK	SLDLS(0.001)GQAFDEAY(0.999)AEFQQLK	Y	13	1327;1327;1350	1327	NaN	NaN	NaN	NaN	NaN	NaN	-0.705936	NaN	0.998927	1.69e-05	60.764	53.215	60.764	-0.047618	8713500
Myomesin 2	Myom2	Q14BI5	gi|568953178|ref|XP_006508791.1|	gi|568953178|ref|XP_006508791.1|	gi|568953178|ref|XP_006508791.1|;gi|170763465|ref|NP_032690.2|;gi|568953176|ref|XP_006508790.1|	SLVAVPFYQKR	SLVAVPFY(1)QKR	Y	8	9;9;32	9	-0.30621	0.0968675	NaN	NaN	NaN	-0.213625	-0.640366	-0.154218	0.999998	0.00120726	57.532	50.166	57.532	-2.8519	4559500
Myomesin 2	Myom2	Q14BI5	gi|568953178|ref|XP_006508791.1|	gi|568953178|ref|XP_006508791.1|	gi|568953178|ref|XP_006508791.1|;gi|170763465|ref|NP_032690.2|;gi|568953176|ref|XP_006508790.1|	VSWYHKEAK	VS(0.001)WY(0.999)HKEAK	Y	4	1265;1265;1288	1265	-0.992666	-0.120043	NaN	NaN	NaN	1.89259	1.05149	1.40814	0.999236	0.00228659	61.78	37.69	61.78	0.3743	1188000
Myomesin 2	Myom2	Q14BI5	gi|568953178|ref|XP_006508791.1|	gi|568953178|ref|XP_006508791.1|	gi|568953178|ref|XP_006508791.1|;gi|170763465|ref|NP_032690.2|;gi|568953176|ref|XP_006508790.1|	YGVHTLEINR	Y(1)GVHTLEINR	Y	1	209;209;232	209	NaN	NaN	NaN	-0.823801	-1.12485	NaN	NaN	NaN	1	8.95e-07	130.66	114.79	130.66	-0.24985	2089000
Myotilin	Myot	Q9JIF9	gi|84781791|ref|NP_001028793.1|	gi|84781791|ref|NP_001028793.1|	gi|84781791|ref|NP_001028793.1|;gi|569004272|ref|XP_006526196.1|;gi|569004270|ref|XP_006526195.1|;gi|569004268|ref|XP_006526194.1|	ISLYHDNAGR	ISLY(1)HDNAGR	Y	4	397;397;398;398	397	0.471486	1.12725	0.916056	0.100823	NaN	NaN	0.874984	-0.840879	1	8.26e-07	125.75	59.055	125.75	-0.45138	3941500
Myocardial zonula adherens protein	Myzap	Q3UIJ9	gi|85701616|ref|NP_001028380.1|	gi|85701616|ref|NP_001028380.1|	gi|85701616|ref|NP_001028380.1|	LDYLTETQPK	LDY(0.992)LT(0.006)ET(0.002)QPK	Y	3	411	411	0.0699565	0.454178	NaN	NaN	NaN	NaN	-1.30534	NaN	0.991998	0.00444743	49.189	23.508	49.189	1.5465	984590
Myocardial zonula adherens protein	Myzap	Q3UIJ9	gi|85701616|ref|NP_001028380.1|	gi|85701616|ref|NP_001028380.1|	gi|85701616|ref|NP_001028380.1|	MYGDYDEMR	MYGDY(1)DEMR	Y	5	122	122	-0.827474	-0.120043	0.407789	NaN	NaN	-0.147768	0.744686	1.25924	0.999738	0.00644887	51.445	41.79	51.445	-0.080827	861880
Cytoplasmic protein NCK1	Nck1	Q99M51	gi|1027250600|ref|NP_001311459.1|	gi|1027250600|ref|NP_001311459.1|	gi|1027250600|ref|NP_001311459.1|;gi|568960803|ref|XP_006510903.1|;gi|34328187|ref|NP_035008.2|	LYDLNMPAFVK	LY(1)DLNMPAFVK	Y	2	41;105;105	105	0.401529	-0.338597	0.603122	0.871417	NaN	-0.857208	-0.187145	-0.075737	1	0.000324788	74.841	60.606	74.841	0.00097372	4822700
NADH dehydrogenase [ubiquinone] 1 alpha subcomplex subunit 8	Ndufa8	Q9DCJ5	gi|21312012|ref|NP_080979.1|	gi|21312012|ref|NP_080979.1|	gi|21312012|ref|NP_080979.1|	VKTDRPLPENPYHSR	VKT(0.001)DRPLPENPY(0.983)HS(0.017)R	Y	12	142	142	-1.09691	1.26011	-0.591196	1.02027	NaN	0.920159	-0.330034	-0.154218	0.982643	6.66e-05	80.507	74.612	44.925	0.91433	11412000
NADH dehydrogenase [ubiquinone] 1 beta subcomplex subunit 10	Ndufb10	Q9DCS9	gi|58037109|ref|NP_080960.1|	gi|58037109|ref|NP_080960.1|	gi|58037109|ref|NP_080960.1|	TPAPSPQTSLPNPITYLTK	TPAPS(0.001)PQT(0.007)S(0.007)LPNPIT(0.225)Y(0.692)LT(0.068)K	Y	16	32	32	NaN	-0.120043	-0.721022	NaN	NaN	0.180603	-0.53367	0.254305	0.691952	5.8e-05	50.957	47.524	41.513	0.19648	6604400
NADH dehydrogenase [ubiquinone] 1 beta subcomplex subunit 10	Ndufb10	Q9DCS9	gi|58037109|ref|NP_080960.1|	gi|58037109|ref|NP_080960.1|	gi|58037109|ref|NP_080960.1|	TYYYHR	T(0.008)Y(0.992)Y(0.001)YHR	Y	2	62	62	-0.845026	-1.68447	NaN	NaN	NaN	1.19462	0.345464	0.427134	0.991804	0.0048581	88.627	47.125	69.39	0.90193	2398100
NADH dehydrogenase [ubiquinone] 1 beta subcomplex subunit 11, mitochondrial	Ndufb11	O09111	gi|569008609|ref|XP_006527617.1|	gi|569008609|ref|XP_006527617.1|	gi|569008609|ref|XP_006527617.1|;gi|158631246|ref|NP_062308.2|	YREVNGLPIMESNYFDPSK	Y(1)REVNGLPIMESNYFDPSK	Y	1	126;126	126	NaN	NaN	NaN	-0.666159	-1.82569	NaN	NaN	NaN	0.999999	2.43e-05	89.859	81.756	89.859	-0.74362	19487000
NADH dehydrogenase [ubiquinone] 1 beta subcomplex subunit 7	Ndufb7	Q9CR61	gi|13385322|ref|NP_080119.1|	gi|13385322|ref|NP_080119.1|	gi|13385322|ref|NP_080119.1|	DYCAHYLIR	DY(1)CAHYLIR	Y	2	58	58	-0.897138	-0.755658	NaN	0.41759	0.689155	0.203155	-0.749192	-0.204933	1	5.69e-07	144.9	119.09	96.948	0.46504	8795400
NADH dehydrogenase [ubiquinone] 1 beta subcomplex subunit 7	Ndufb7	Q9CR61	gi|13385322|ref|NP_080119.1|	gi|13385322|ref|NP_080119.1|	gi|13385322|ref|NP_080119.1|	DYCAHYLIR	DYCAHY(1)LIR	Y	6	62	62	-1.2508	-0.613159	-0.0428249	-0.0136449	0.597916	0.892607	0.11653	0.248593	1	7.98e-07	144.09	122.39	117.89	-0.30607	19746000
NADH dehydrogenase [ubiquinone] 1 beta subcomplex subunit 7	Ndufb7	Q9CR61	gi|13385322|ref|NP_080119.1|	gi|13385322|ref|NP_080119.1|	gi|13385322|ref|NP_080119.1|	HEQHDWDYCEHLDYVKR	HEQHDWDY(1)CEHLDYVKR	Y	8	89	89	0.309919	-0.220058	NaN	NaN	NaN	0.743365	-1.37595	0.244029	0.999979	2.71e-05	81.656	76.399	81.656	-0.57178	9898100
NADH dehydrogenase [ubiquinone] 1 beta subcomplex subunit 8, mitochondrial	Ndufb8	Q9D6J5	gi|13385558|ref|NP_080337.1|	gi|13385558|ref|NP_080337.1|	gi|13385558|ref|NP_080337.1|	QYPYNNLYLER	QY(1)PYNNLYLER	Y	2	161	161	-0.835065	-0.120043	NaN	NaN	1.10253	0.571927	-0.304394	0.210946	0.999995	0.000278599	83.045	40.709	83.045	-0.054366	12456000
NADH dehydrogenase [ubiquinone] 1 beta subcomplex subunit 8, mitochondrial	Ndufb8	Q9D6J5	gi|13385558|ref|NP_080337.1|	gi|13385558|ref|NP_080337.1|	gi|13385558|ref|NP_080337.1|	QYPYNNLYLER	QY(0.002)PY(0.994)NNLY(0.003)LER	Y	4	163	163	NaN	NaN	NaN	-0.761724	-0.435912	-0.693381	-1.35387	NaN	0.994398	0.00111388	56.205	51.535	47.712	0.17419	5232600
Olfactory receptor 1404	Olfr1404	Q8VGE1	gi|22203801|ref|NP_667092.1|	gi|22203801|ref|NP_667092.1|	gi|22203801|ref|NP_667092.1|	YSVIMGRK	Y(0.997)S(0.003)VIMGRK	Y	1	133	133	NaN	NaN	NaN	-0.914175	-0.858984	NaN	NaN	NaN	0.996937	0.00513597	46.426	17.277	46.426	-3.2066	1400000
Dynamin-like 120 kDa protein, mitochondrial	Opa1	P58281	gi|19526960|ref|NP_598513.1|	gi|19526960|ref|NP_598513.1|	gi|19526960|ref|NP_598513.1|;gi|312836758|ref|NP_001186106.1|;gi|568996433|ref|XP_006522720.1|;gi|568996431|ref|XP_006522719.1|;gi|568996429|ref|XP_006522718.1|;gi|568996427|ref|XP_006522717.1|	VNDEHPAYLASDEITTVRK	VNDEHPAY(0.999)LAS(0.001)DEITTVRK	Y	8	808;826;845;863;863;863	808	0.144196	0.654241	0.138413	-0.917217	NaN	NaN	0.520056	NaN	0.999148	2.22e-05	53.554	45.24	53.554	-0.028771	6222900
Palladin	Palld	Q9ET54	gi|657940866|ref|NP_001280703.1|	gi|657940866|ref|NP_001280703.1|	gi|657940866|ref|NP_001280703.1|;gi|568955002|ref|XP_006509571.1|;gi|568955000|ref|XP_006509570.1|;gi|658132460|ref|NP_001280702.1|;gi|568954996|ref|XP_006509568.1|;gi|568954994|ref|XP_006509567.1|;gi|124487061|ref|NP_001074859.1|;gi|568954992|ref|XP_006509566.1|;gi|755525609|ref|XP_011240544.1|;gi|657940868|ref|NP_001280701.1|	LQNTGVADGYPVRLECR	LQNT(0.002)GVADGY(0.998)PVRLECR	Y	10	529;546;546;868;885;885;1032;1257;1274;1274	1274	-0.403313	-0.209091	-0.104616	0.251345	0.669184	0.641613	0.227579	-0.0703489	0.998298	0.000145276	87.429	62.064	80.545	-1.3316	17906000
Palmdelphin	Palmd	Q9JHU2	gi|89363042|ref|NP_075734.3|	gi|89363042|ref|NP_075734.3|	gi|89363042|ref|NP_075734.3|	SPTEYHEPVYANPFCRPVTPQR	SPTEYHEPVY(0.997)ANPFCRPVT(0.003)PQR	Y	10	261	261	NaN	-0.541753	-0.355655	1.66374	NaN	-0.0544831	-0.653409	-0.154218	0.996685	5.09e-06	83.423	76.167	83.423	1.446	4375600
Pard3b protein (Fragment)	Pard3b	Q05B96	gi|568907010|ref|XP_006496362.1|	gi|568907010|ref|XP_006496362.1|	gi|568907010|ref|XP_006496362.1|;gi|163310767|ref|NP_001074519.2|;gi|568907008|ref|XP_006496361.1|	DGRPLSPDHLEGLYAK	DGRPLSPDHLEGLY(1)AK	Y	14	819;998;1033	104	NaN	NaN	NaN	-0.996266	-0.664894	NaN	NaN	NaN	0.999997	9.47e-05	68.044	60.396	68.044	-0.28001	1757600
Pyruvate dehydrogenase E1 component subunit alpha, somatic form, mitochondrial	Pdha1	P35486	gi|6679261|ref|NP_032836.1|	gi|6679261|ref|NP_032836.1|	gi|6679261|ref|NP_032836.1|	YHGHSMSDPGVSYR	YHGHSMSDPGVS(0.213)Y(0.787)R	Y	13	301	301	0.43968	1.89313	0.619288	-1.44521	NaN	NaN	0.146973	-0.554308	0.787041	0.00167482	48.467	38.93	48.467	0.92847	5391900
PDZ and LIM domain protein 5	Pdlim5	Q9CRA2	gi|568923361|ref|XP_006501814.1|;gi|300069036|ref|NP_001177783.1|	gi|300069036|ref|NP_001177783.1|	gi|568923361|ref|XP_006501814.1|;gi|300069043|ref|NP_001177786.1|;gi|568923359|ref|XP_006501813.1|;gi|170650625|ref|NP_072048.2|;gi|300069034|ref|NP_001177782.1|;gi|170650627|ref|NP_062783.2|;gi|300069036|ref|NP_001177783.1|;gi|568923355|ref|XP_006501811.1|;gi|300069038|ref|NP_001177784.1|;gi|300069041|ref|NP_001177785.1|;gi|300069024|ref|NP_001177781.1|;gi|568923349|ref|XP_006501808.1|;gi|568923…	NTEFYHIPTHSDASK	NT(0.009)EFY(0.99)HIPTHSDASK	Y	5	148;148;153;153;128;251;142;148;142;142;142;148;153;251;128;262;262;262;262;251;257;262	128	-0.120946	NaN	0.303699	1.20216	NaN	-0.447063	NaN	0.0826532	0.990124	8.59e-05	71.98	64.469	71.98	-0.055973	2733700
Platelet endothelial cell adhesion molecule	Pecam1	Q08481	gi|761631380|ref|NP_001292087.1|	gi|761631380|ref|NP_001292087.1|	gi|761631380|ref|NP_001292087.1|;gi|755537649|ref|XP_011247095.1|;gi|74024907|ref|NP_032842.2|;gi|761631371|ref|NP_001292086.1|;gi|755537647|ref|XP_011247094.1|	ATETVYSEIR	ATET(0.001)VY(0.773)S(0.227)EIR	Y	6	601;684;702;702;702	702	-0.554683	-1.09642	-1.17206	-0.0619176	-0.00962436	-0.320589	-0.44119	0.154272	0.77272	0.000799428	73.887	49.049	73.887	1.0994	5000100
Phosphoglycerate mutase 1	Pgam1	Q9DBJ1	gi|114326546|ref|NP_075907.2|	gi|114326546|ref|NP_075907.2|	gi|114326546|ref|NP_075907.2|	AAYKLVLIR	AAY(1)KLVLIR	Y	3	4	4	NaN	0.881819	NaN	NaN	NaN	-0.67096	NaN	NaN	1	0.00605861	48.423	39.089	48.423	-0.6168	462330
Phosphoglycerate mutase 1	Pgam1	Q9DBJ1	gi|114326546|ref|NP_075907.2|	gi|114326546|ref|NP_075907.2|	gi|114326546|ref|NP_075907.2|	FSGWYDADLSPAGHEEAKR	FS(0.004)GWY(0.996)DADLSPAGHEEAKR	Y	5	26	26	0.144196	NaN	NaN	0.0353071	0.744391	NaN	NaN	0.938857	0.996192	1.06e-05	81.807	70.826	81.807	-0.11603	11741000
Phosphoglycerate mutase 1	Pgam1	Q9DBJ1	gi|114326546|ref|NP_075907.2|;gi|9256624|ref|NP_061358.1|	gi|9256624|ref|NP_061358.1|	gi|114326546|ref|NP_075907.2|;gi|9256624|ref|NP_061358.1|	HYGGLTGLNK	HY(1)GGLTGLNK	Y	2	92;92	92	-0.853586	0.26769	-0.0958576	2.61009	NaN	1.11386	0.699038	0.141073	1	1.06e-20	157.68	136.37	147.75	-0.2201	259980000
Phosphoglycerate mutase 2	Pgam2	O70250	gi|9256624|ref|NP_061358.1|	gi|9256624|ref|NP_061358.1|	gi|9256624|ref|NP_061358.1|	HNYYTSISK	HNY(0.985)Y(0.014)TSISK	Y	3	132	132	-0.234442	0.127715	-0.532373	1.31745	NaN	1.68704	0.851732	0.647635	0.985216	2.28e-07	146.11	69.879	146.11	0.17368	16580000
Phosphoglycerate mutase 2	Pgam2	O70250	gi|9256624|ref|NP_061358.1|	gi|9256624|ref|NP_061358.1|	gi|9256624|ref|NP_061358.1|	HNYYTSISK	HNY(0.127)Y(0.832)T(0.021)S(0.021)ISK	Y	4	133	133	NaN	-0.27743	-0.0736055	0.563417	NaN	0.883193	0.147948	-0.0123256	0.831753	1.75e-05	68.557	42.115	68.557	1.3996	1186400
Phosphoglycerate kinase 1	Pgk1	P09411	gi|70778976|ref|NP_032854.2|	gi|70778976|ref|NP_032854.2|	gi|70778976|ref|NP_032854.2|	KELNYFAK	KELNY(1)FAK	Y	5	196	196	-0.486421	-0.00250917	-0.214586	0.146869	-0.00962436	0.29645	0.387309	0.824377	1	0.00338148	93.649	46.83	93.649	0.52275	23465000
Phosphoglycerate kinase 1	Pgk1	P09411	gi|70778976|ref|NP_032854.2|	gi|70778976|ref|NP_032854.2|	gi|70778976|ref|NP_032854.2|	SVVLMSHLGRPDGVPMPDKYSLEPVAAELK	SVVLMS(0.001)HLGRPDGVPMPDKY(0.815)S(0.184)LEPVAAELK	Y	20	76	76	NaN	2.35419	NaN	-1.9002	-0.421122	NaN	NaN	2.45642	0.815136	8.73e-12	74.382	69.136	74.382	-0.90928	43449000
Phosphoglucomutase-2	Pgm2	Q7TSV4	gi|227330633|ref|NP_082408.3|	gi|227330633|ref|NP_082408.3|	gi|227330633|ref|NP_082408.3|	IALYETPTGWK	IALY(1)ETPTGWK	Y	4	353	NA	-0.459145	-0.24929	NaN	-0.502116	-0.00962436	0.279907	-0.520184	-0.147418	0.999849	5.23e-10	133.89	70.677	119.27	-0.49364	17609000
Phosphoglucomutase-like protein 5	Pgm5	Q8BZF8	gi|70608166|ref|NP_778178.3|	gi|70608166|ref|NP_778178.3|	gi|70608166|ref|NP_778178.3|	FNVANGGPAPDVVSDKIYQISK	FNVANGGPAPDVVS(0.005)DKIY(0.976)QIS(0.019)K	Y	18	153	153	-0.103716	NaN	NaN	NaN	0.201869	0.0952545	NaN	0.0719238	0.975618	1.5e-06	75.773	68.898	75.773	-0.14933	19296000
Phosphoglucomutase-like protein 5	Pgm5	Q8BZF8	gi|70608166|ref|NP_778178.3|	gi|70608166|ref|NP_778178.3|	gi|70608166|ref|NP_778178.3|	VPVYETPAGWR	VPVY(0.979)ET(0.021)PAGWR	Y	4	358	358	0.109104	-0.238505	0.982824	NaN	0.569877	-0.203789	0.14028	-0.154218	0.979393	0.00144892	54.486	24.743	54.486	0.29686	8422700
Prohibitin	Phb	P67778	gi|6679299|ref|NP_032857.1|	gi|6679299|ref|NP_032857.1|	gi|6679299|ref|NP_032857.1|;gi|85702063|ref|NP_001028937.1|	KLEAAEDIAYQLSR	KLEAAEDIAY(1)QLSR	Y	10	249;249	249	-0.429619	0.0425785	NaN	-0.150475	0.0738243	0.183792	-0.305412	-0.343776	0.999876	5.24e-12	138.91	117.86	65.374	0.22126	172340000
Prohibitin-2	Phb2	O35129	gi|126723336|ref|NP_031557.2|	gi|126723336|ref|NP_031557.2|	gi|126723336|ref|NP_031557.2|	VLSRPNAQELPSMYQR	VLSRPNAQELPS(0.037)MY(0.963)QR	Y	14	121	121	0.311644	0.310834	0.690023	NaN	NaN	1.52723	1.14888	NaN	0.963128	0.000146068	78.69	68.549	78.69	-0.46893	4137700
Isoform 2 of Pleckstrin homology-like domain family B member 1	Phldb1	Q6PDH0-2	gi|1039791896|ref|XP_017168580.1|	gi|1039791896|ref|XP_017168580.1|	gi|1039791896|ref|XP_017168580.1|;gi|568958685|ref|XP_006509992.1|;gi|568958683|ref|XP_006509991.1|;gi|1039791866|ref|XP_017168567.1|;gi|1039791864|ref|XP_017168566.1|;gi|1039791862|ref|XP_017168565.1|;gi|1039791860|ref|XP_017168564.1|;gi|1039791858|ref|XP_017168563.1|;gi|1039791856|ref|XP_017168562.1|;gi|1039791854|ref|XP_017168561.1|;gi|1039791852|ref|XP_017168560.1|;gi|755528293|ref|XP_0065099…	AQEYVTLEQLR	AQEY(0.997)VT(0.003)LEQLR	Y	4	326;889;889;966;1009;1009;1009;1009;1009;1009;1009;1009;1009;1009	NA	NaN	-2.12275	NaN	0.580918	0.798117	NaN	NaN	NaN	0.997315	0.000272356	90.614	77.429	68.676	0.38713	2673800
Phosphatidylinositol 3-kinase regulatory subunit alpha	Pik3r1	P26450	gi|568984302|ref|XP_006517633.1|	gi|568984302|ref|XP_006517633.1|	gi|568984302|ref|XP_006517633.1|;gi|568984300|ref|XP_006517632.1|;gi|68299809|ref|NP_001020126.1|;gi|117320524|ref|NP_001070963.1|	DQYLMWLTQK	DQY(1)LMWLTQK	Y	3	259;280;310;580	580	0.41159	0.564076	0.587564	NaN	NaN	-1.04195	-0.273259	0.32018	0.999994	0.00121593	66.267	54.684	66.267	2.0785	6885900
Phosphatidylinositol 3-kinase regulatory subunit alpha	Pik3r1	P26450	gi|568984302|ref|XP_006517633.1|	gi|568984302|ref|XP_006517633.1|	gi|568984302|ref|XP_006517633.1|;gi|568984300|ref|XP_006517632.1|;gi|68299809|ref|NP_001020126.1|;gi|117320524|ref|NP_001070963.1|	SREYDRLYEEYTR	SREYDRLY(1)EEYTR	Y	8	146;167;197;467	467	1.01541	0.515745	-0.101516	-0.494994	-1.47395	-0.67096	NaN	NaN	0.999805	4.87e-13	139.86	118.08	139.86	0.057582	11491000
Plakophilin 2	Pkp2	Q9CQ73	gi|21312960|ref|NP_080439.1|	gi|21312960|ref|NP_080439.1|	gi|21312960|ref|NP_080439.1|	AGMTATYGSR	AGMTAT(0.025)Y(0.807)GS(0.168)R	Y	7	119	119	-1.20298	-1.312	-1.19416	1.5627	NaN	0.226632	0.505307	0.298179	0.807226	0.000215307	99.283	83.843	55.806	-0.51836	3938600
Plakophilin 2	Pkp2	Q9CQ73	gi|21312960|ref|NP_080439.1|	gi|21312960|ref|NP_080439.1|	gi|21312960|ref|NP_080439.1|	AHYGHSEYQYAWR	AHYGHSEY(1)QYAWR	Y	8	166	166	0.166384	-0.142578	-0.10029	2.64617	4.58063	0.434057	0.404484	1.09659	0.999819	5.04e-38	181.66	155.68	181.66	0.24524	191550000
Plakophilin 2	Pkp2	Q9CQ73	gi|21312960|ref|NP_080439.1|	gi|21312960|ref|NP_080439.1|	gi|21312960|ref|NP_080439.1|	DYDMLK	DY(1)DMLK	Y	2	108	108	-0.221036	-1.26363	0.00796382	3.20424	2.04406	-0.119575	-0.298674	0.655689	1	5.82e-07	102.98	11.396	77.748	-0.28398	16591000
Plakophilin 2	Pkp2	Q9CQ73	gi|21312960|ref|NP_080439.1|	gi|21312960|ref|NP_080439.1|	gi|21312960|ref|NP_080439.1|	LKEQYQDLQMPEER	LKEQY(1)QDLQMPEER	Y	5	573	573	0.291663	-0.759835	-0.222689	0.854038	1.47415	1.50258	NaN	NaN	1	1.26e-74	214.89	191.07	62.357	-0.046991	125620000
Plakophilin 2	Pkp2	Q9CQ73	gi|21312960|ref|NP_080439.1|	gi|21312960|ref|NP_080439.1|	gi|21312960|ref|NP_080439.1|	TSSVPEYVYK	TSSVPEY(0.121)VY(0.879)K	Y	9	88	88	-0.699385	NaN	NaN	0.695486	-0.00962436	NaN	-0.475338	NaN	0.879372	0.000148185	102.52	79.204	59.908	0.093778	4752400
Plakophilin 2	Pkp2	Q9CQ73	gi|21312960|ref|NP_080439.1|	gi|21312960|ref|NP_080439.1|	gi|21312960|ref|NP_080439.1|	YSQSIYMQNR	YSQSIY(1)MQNR	Y	6	545	545	0.00247975	-0.0680586	-1.29608	0.685565	NaN	1.26778	0.34754	0.418609	0.999999	1.52e-08	147.41	140.39	147.41	1.6707	37560000
Plakophilin-4	Pkp4	Q68FH0	gi|568916324|ref|XP_006499243.1|	gi|568916324|ref|XP_006499243.1|	gi|568916324|ref|XP_006499243.1|;gi|568916322|ref|XP_006499242.1|;gi|1039760196|ref|XP_017173041.1|;gi|1039760192|ref|XP_017173038.1|;gi|1039760190|ref|XP_017173036.1|;gi|1039760188|ref|XP_017173035.1|;gi|568916318|ref|XP_006499240.1|;gi|568916316|ref|XP_006499239.1|;gi|1039760185|ref|XP_017173033.1|;gi|1039760182|ref|XP_017173032.1|;gi|1039760180|ref|XP_017173030.1|;gi|1039760178|ref|XP_01717302…	GLYPGSSKPSPIYISSYSSPAR	GLY(0.002)PGS(0.023)S(0.023)KPS(0.074)PIY(0.772)IS(0.074)S(0.023)Y(0.007)S(0.002)S(0.001)PAR	Y	13	752;752;752;752;944;944;945;945;945;945;945;945;945;945;1091;1092;1093;1093;1109	1093	NaN	NaN	NaN	1.9059	2.46587	-1.34516	-0.918283	-1.1739	0.772323	1.1e-05	51.31	48.255	51.31	-0.18115	5504400
Plakophilin-4	Pkp4	Q68FH0	gi|568916324|ref|XP_006499243.1|	gi|568916324|ref|XP_006499243.1|	gi|568916324|ref|XP_006499243.1|;gi|568916322|ref|XP_006499242.1|;gi|1039760196|ref|XP_017173041.1|;gi|1039760192|ref|XP_017173038.1|;gi|1039760190|ref|XP_017173036.1|;gi|1039760188|ref|XP_017173035.1|;gi|568916318|ref|XP_006499240.1|;gi|568916316|ref|XP_006499239.1|;gi|1039760185|ref|XP_017173033.1|;gi|1039760182|ref|XP_017173032.1|;gi|1039760180|ref|XP_017173030.1|;gi|1039760178|ref|XP_01717302…	NNYALNTAATYAEPYRPVQYR	NNYALNTAAT(0.129)Y(0.868)AEPY(0.003)RPVQYR	Y	11	136;136;136;136;328;328;329;329;329;329;329;329;329;329;475;476;477;477;477;474;477;477	477	-2.22491	-1.94958	NaN	2.99729	NaN	-0.390594	-0.901196	-0.154218	0.867765	1.97e-15	141.07	128.62	141.07	-0.11263	15196000
Plakophilin-4	Pkp4	Q68FH0	gi|568916324|ref|XP_006499243.1|	gi|568916324|ref|XP_006499243.1|	gi|568916324|ref|XP_006499243.1|;gi|568916322|ref|XP_006499242.1|;gi|1039760196|ref|XP_017173041.1|;gi|1039760192|ref|XP_017173038.1|;gi|1039760190|ref|XP_017173036.1|;gi|1039760188|ref|XP_017173035.1|;gi|568916318|ref|XP_006499240.1|;gi|568916316|ref|XP_006499239.1|;gi|1039760185|ref|XP_017173033.1|;gi|1039760182|ref|XP_017173032.1|;gi|1039760180|ref|XP_017173030.1|;gi|1039760178|ref|XP_01717302…	SAVSPDLHITPIYEGR	SAVSPDLHIT(0.019)PIY(0.981)EGR	Y	13	73;73;73;73;266;266;266;266;266;266;266;266;266;266;412;414;414;414;414;412;414;414	414	NaN	NaN	-0.382914	1.52992	1.47436	NaN	-0.841584	-1.01228	0.980831	0.000109988	94.487	81.069	54.281	-0.33085	6763100
Plakophilin-4	Pkp4	Q68FH0	gi|568916324|ref|XP_006499243.1|	gi|568916324|ref|XP_006499243.1|	gi|568916324|ref|XP_006499243.1|;gi|568916322|ref|XP_006499242.1|;gi|1039760196|ref|XP_017173041.1|;gi|1039760192|ref|XP_017173038.1|;gi|1039760190|ref|XP_017173036.1|;gi|1039760188|ref|XP_017173035.1|;gi|568916318|ref|XP_006499240.1|;gi|568916316|ref|XP_006499239.1|;gi|1039760185|ref|XP_017173033.1|;gi|1039760182|ref|XP_017173032.1|;gi|1039760180|ref|XP_017173030.1|;gi|1039760178|ref|XP_01717302…	STTNYVDFYSTK	STTNY(1)VDFYSTK	Y	5	825;825;825;825;1017;1017;1018;1018;1018;1018;1018;1018;1018;1018;1164;1165;1166;1166;1182;1120;1123	1166	NaN	NaN	NaN	-0.364119	-0.00962436	NaN	NaN	NaN	0.999994	2.09e-11	142.29	120.74	142.29	-0.26971	22082000
Plakophilin-4	Pkp4	Q68FH0	gi|568916324|ref|XP_006499243.1|	gi|568916324|ref|XP_006499243.1|	gi|568916324|ref|XP_006499243.1|;gi|568916322|ref|XP_006499242.1|;gi|1039760196|ref|XP_017173041.1|;gi|1039760192|ref|XP_017173038.1|;gi|1039760190|ref|XP_017173036.1|;gi|1039760188|ref|XP_017173035.1|;gi|568916318|ref|XP_006499240.1|;gi|568916316|ref|XP_006499239.1|;gi|1039760185|ref|XP_017173033.1|;gi|1039760182|ref|XP_017173032.1|;gi|1039760180|ref|XP_017173030.1|;gi|1039760178|ref|XP_01717302…	TYYSPVYR	TY(0.012)Y(0.962)S(0.025)PVYR	Y	3	79;79;79;79;272;272;272;272;272;272;272;272;272;272;418;420;420;420;420;418;420;420	420	NaN	NaN	NaN	-0.812671	-1.16257	NaN	NaN	NaN	0.962103	0.00334573	71.379	60.669	71.379	0.29315	666570
Pleckstrin homology domain-containing family A member 6	Plekha6	Q7TQG1	gi|568909005|ref|XP_006529619.1|	gi|568909005|ref|XP_006529619.1|	gi|568909005|ref|XP_006529619.1|;gi|568909003|ref|XP_006529618.1|;gi|237681204|ref|NP_001153740.1|;gi|568909001|ref|XP_006529617.1|;gi|568908999|ref|XP_006529616.1|;gi|33636693|ref|NP_891846.1|;gi|568908997|ref|XP_006529615.1|;gi|568908995|ref|XP_006529614.1|;gi|568908993|ref|XP_006529613.1|;gi|568908991|ref|XP_006529612.1|;gi|568908989|ref|XP_006529611.1|;gi|568908987|ref|XP_006529610.1|;gi|5689…	SEDIYADPAAYVMR	SEDIY(1)ADPAAYVMR	Y	5	340;340;512;596;616;492;512;512;512;512;616;616;616;616;548;554;616;616;616;616;616;596;616;616	492	0.144196	-0.648528	NaN	2.46636	2.25757	-1.15951	-0.992992	0.389902	0.999996	2.07e-08	126.1	108.89	126.1	-0.35866	28712000
Pleckstrin homology domain-containing family A member 7	Plekha7	Q3UIL6	gi|762006021|ref|NP_001292118.1|	gi|762006021|ref|NP_001292118.1|	gi|762006021|ref|NP_001292118.1|;gi|27370088|ref|NP_766331.1|;gi|1031621035|ref|NP_001292119.1|;gi|1039778414|ref|XP_017177682.1|;gi|1039778410|ref|XP_017177680.1|;gi|1039778406|ref|XP_017177678.1|;gi|762006006|ref|NP_001292115.1|;gi|762006000|ref|NP_001292114.1|	SADDTYLQLKK	SADDT(0.173)Y(0.827)LQLKK	Y	6	548;417;591;548;548;548;607;653	653	NaN	NaN	NaN	-0.613885	NaN	-2.50395	-0.738844	NaN	0.827267	0.0137786	47.302	35.383	47.302	0.62405	1393600
Cardiac phospholamban	Pln	P61014	gi|213512816|ref|NP_001135399.1|	gi|213512816|ref|NP_001135399.1|	gi|213512816|ref|NP_001135399.1|;gi|12963503|ref|NP_075618.1|	VQYLTR	VQY(1)LTR	Y	3	6;6	6	0.750733	1.60293	0.916056	2.06259	NaN	0.130517	0.274363	-0.276422	0.999718	0.00482402	100.07	30.068	100.07	0.41926	9954200
Inorganic diphosphatase	Ppa2	D3Z636	gi|568924345|ref|XP_006502280.1|	gi|568924345|ref|XP_006502280.1|	gi|568924345|ref|XP_006502280.1|;gi|568924343|ref|XP_006502279.1|;gi|651167676|ref|NP_001280570.1|;gi|22203753|ref|NP_666253.1|	LYKVPDGKPENK	LY(1)KVPDGKPENK	Y	2	119;178;236;236	236	-0.427586	NaN	-1.68775	1.34048	0.398778	0.237869	-0.345848	NaN	1	0.000173491	78.342	52.868	78.342	-0.06432	3055700
Protein phosphatase 1 regulatory subunit	Ppp1r12b	A6H644	gi|1039729336|ref|XP_017176768.1|	gi|1039729336|ref|XP_017176768.1|	gi|1039729336|ref|XP_017176768.1|;gi|1039729334|ref|XP_017176767.1|;gi|568909319|ref|XP_006529773.1|;gi|568909317|ref|XP_006529772.1|;gi|124486803|ref|NP_001074776.1|;gi|1039729330|ref|XP_017176766.1|;gi|568909313|ref|XP_006529770.1|	SLEEEPIYHR	SLEEEPIY(1)HR	Y	8	605;773;712;712;712;773;773	712	-0.493646	NaN	0.153964	1.00599	NaN	0.000821843	NaN	NaN	1	4.29e-06	114.4	68.049	114.4	1.1466	3190100
Peroxiredoxin-1	Prdx1	P35700	gi|6754976|ref|NP_035164.1|	gi|6754976|ref|NP_035164.1|	gi|6754976|ref|NP_035164.1|	IGYPAPNFK	IGY(1)PAPNFK	Y	3	10	10	-0.289188	-0.435654	1.02384	1.62711	1.78391	-0.11495	0.506012	-0.154218	1	1.16e-06	142.79	115.83	41.448	-0.15484	38348000
Uncharacterized protein	Prosc	Q9D9Z8	gi|755524830|ref|XP_011240412.1|	gi|755524830|ref|XP_011240412.1|	gi|755524830|ref|XP_011240412.1|;gi|16930823|ref|NP_473398.1|;gi|568953806|ref|XP_006509044.1|;gi|84872182|ref|NP_001034166.1|	TFGENYVQELLEK	TFGENY(1)VQELLEK	Y	6	85;69;85;69	NA	0.654481	1.12148	-0.268966	NaN	-0.924656	0.0608701	-0.648922	NaN	0.999653	9.93e-05	78.814	68.461	70.889	-0.19145	5021900
Serine/threonine-protein kinase PRP4 homolog (Fragment)	Prpf4b	A0A1Y7VLT3	gi|568981641|ref|XP_006516647.1|	gi|568981641|ref|XP_006516647.1|	gi|568981641|ref|XP_006516647.1|;gi|1039743351|ref|XP_017170927.1|;gi|568981638|ref|XP_006516646.1|;gi|568981636|ref|XP_006516645.1|;gi|158854005|ref|NP_038858.2|;gi|1039743346|ref|XP_017170926.1|;gi|1039743344|ref|XP_017170925.1|;gi|1039743342|ref|XP_017170924.1|;gi|1039743340|ref|XP_017170923.1|;gi|1039743338|ref|XP_017170922.1|;gi|1039743336|ref|XP_017170921.1|;gi|1039743334|ref|XP_017170920.1…	LCDFGSASHVADNDITPYLVSR	LCDFGSASHVADNDIT(0.001)PY(0.983)LVS(0.016)R	Y	18	849;849;849;849;849;849;849;849;849;849;849;849;849;849;849;849;849;849	353	0.427915	0.584679	-0.323724	-1.24678	-0.081406	-0.141096	-0.743869	-0.392583	0.983001	1.84e-42	174.01	163.86	174.01	0.24112	1709600000
Proteasome subunit alpha type-2	Psma2	P49722	gi|134031994|ref|NP_032970.2|	gi|134031994|ref|NP_032970.2|	gi|134031994|ref|NP_032970.2|	SILYDER	S(0.002)ILY(0.998)DER	Y	4	57	57	0.0864873	0.131025	0.124757	NaN	NaN	NaN	-0.0276758	-0.0987294	0.997798	0.0128709	47.082	13.531	47.082	0.70134	1436400
26S proteasome regulatory subunit 10B (Fragment)	Psmc6	A0A2I3BQ49	gi|27754103|ref|NP_080235.2|	gi|27754103|ref|NP_080235.2|	gi|27754103|ref|NP_080235.2|	VVSSSIVDKYIGESAR	VVS(0.001)S(0.002)S(0.005)IVDKY(0.921)IGES(0.072)AR	Y	10	207	NA	NaN	NaN	NaN	NaN	NaN	-0.15947	-0.17929	NaN	0.921064	0.000240258	44.925	37.142	44.925	-0.85677	1285300
Focal adhesion kinase 1	Ptk2	P34152	gi|568991345|ref|XP_006520497.1|	gi|568991345|ref|XP_006520497.1|	gi|568991345|ref|XP_006520497.1|;gi|194353972|ref|NP_032008.2|;gi|568991343|ref|XP_006520496.1|;gi|1039748189|ref|XP_017171918.1|;gi|568991347|ref|XP_006520498.1|;gi|568991341|ref|XP_006520495.1|;gi|568991339|ref|XP_006520494.1|;gi|568991337|ref|XP_006520493.1|;gi|568991335|ref|XP_006520492.1|;gi|568991333|ref|XP_006520491.1|;gi|568991331|ref|XP_006520490.1|;gi|568991329|ref|XP_006520489.1|;gi|56…	SNDKVYENVTGLVK	S(0.021)NDKVY(0.973)ENVT(0.006)GLVK	Y	6	868;925;928;941;969;969;969;969;969;969;969;969;969;969;972;972;976;979;985;992;1006;1010;1013;1013	925	0.144196	-0.297647	-0.242375	0	0.22657	0.224992	0.53934	-0.64353	0.972697	0.000876952	48.527	36.608	44.925	0.47553	4394200
Focal adhesion kinase 1	Ptk2	P34152	gi|568991345|ref|XP_006520497.1|	gi|568991345|ref|XP_006520497.1|	gi|568991345|ref|XP_006520497.1|;gi|194353972|ref|NP_032008.2|;gi|568991343|ref|XP_006520496.1|;gi|1039748189|ref|XP_017171918.1|;gi|568991347|ref|XP_006520498.1|;gi|568991341|ref|XP_006520495.1|;gi|568991339|ref|XP_006520494.1|;gi|568991337|ref|XP_006520493.1|;gi|568991335|ref|XP_006520492.1|;gi|568991333|ref|XP_006520491.1|;gi|568991331|ref|XP_006520490.1|;gi|568991329|ref|XP_006520489.1|;gi|56…	YMEDSTYYK	Y(1)MEDSTYYK	Y	1	510;570;570;583;611;614;611;611;611;611;611;611;611;611;614;614;621;621;627;655;648;655;655;655;570	570	NaN	NaN	NaN	-0.80783	-1.17939	NaN	NaN	NaN	0.999987	0.000948178	80.688	69.095	80.688	0.40425	2619500
Focal adhesion kinase 1	Ptk2	P34152	gi|568991345|ref|XP_006520497.1|	gi|568991345|ref|XP_006520497.1|	gi|568991345|ref|XP_006520497.1|;gi|194353972|ref|NP_032008.2|;gi|568991343|ref|XP_006520496.1|;gi|1039748189|ref|XP_017171918.1|;gi|568991347|ref|XP_006520498.1|;gi|568991341|ref|XP_006520495.1|;gi|568991339|ref|XP_006520494.1|;gi|568991337|ref|XP_006520493.1|;gi|568991335|ref|XP_006520492.1|;gi|568991333|ref|XP_006520491.1|;gi|568991331|ref|XP_006520490.1|;gi|568991329|ref|XP_006520489.1|;gi|56…	YMEDSTYYKASK	Y(0.001)MEDS(0.013)T(0.108)Y(0.867)Y(0.829)KAS(0.183)K	Y	7	516;576;576;589;617;620;617;617;617;617;617;617;617;617;620;620;627;627;633;661;654;661;661;661;576	576	-0.58856	0.221228	-0.390615	1.33634	NaN	1.01599	0.382215	-0.232426	0.867058	4.44e-10	122.34	109.02	44.829	-0.13209	48146000
Focal adhesion kinase 1	Ptk2	P34152	gi|568991345|ref|XP_006520497.1|	gi|568991345|ref|XP_006520497.1|	gi|568991345|ref|XP_006520497.1|;gi|194353972|ref|NP_032008.2|;gi|568991343|ref|XP_006520496.1|;gi|1039748189|ref|XP_017171918.1|;gi|568991347|ref|XP_006520498.1|;gi|568991341|ref|XP_006520495.1|;gi|568991339|ref|XP_006520494.1|;gi|568991337|ref|XP_006520493.1|;gi|568991335|ref|XP_006520492.1|;gi|568991333|ref|XP_006520491.1|;gi|568991331|ref|XP_006520490.1|;gi|568991329|ref|XP_006520489.1|;gi|56…	YMEDSTYYKASK	YMEDS(0.008)T(0.298)Y(0.749)Y(0.929)KAS(0.017)K	Y	8	517;577;577;590;618;621;618;618;618;618;618;618;618;618;621;621;628;628;634;662;655;662;662;662;577	577	NaN	NaN	NaN	-1.44521	NaN	NaN	NaN	NaN	0.928614	4.44e-10	122.34	109.02	122.34	0.10856	3649500
Tyrosine-protein phosphatase non-receptor type 11	Ptpn11	P35235	gi|158508568|ref|NP_001103462.1|	gi|158508568|ref|NP_001103462.1|	gi|158508568|ref|NP_001103462.1|;gi|6755228|ref|NP_035332.1|	IQNTGDYYDLYGGEK	IQNT(0.044)GDY(0.791)Y(0.165)DLYGGEK	Y	7	62;62	62	0.0669787	-0.281825	0.98935	-0.296437	0.0703506	NaN	0.114928	0.428711	0.791045	1.72e-22	85.493	75.5	85.493	0.045274	89628000
Tyrosine-protein phosphatase non-receptor type 11	Ptpn11	P35235	gi|158508568|ref|NP_001103462.1|	gi|158508568|ref|NP_001103462.1|	gi|158508568|ref|NP_001103462.1|;gi|6755228|ref|NP_035332.1|	VYENVGLMQQQR	VY(1)ENVGLMQQQR	Y	2	580;584	584	NaN	NaN	NaN	-0.77832	-1.28768	NaN	NaN	NaN	1	0.00019831	75.819	50.346	75.819	0.50093	2732400
Receptor-type tyrosine-protein phosphatase alpha	Ptpra	P18052	gi|568915933|ref|XP_006499053.1|	gi|568915933|ref|XP_006499053.1|	gi|568915933|ref|XP_006499053.1|;gi|255304938|ref|NP_001157160.1|;gi|568915931|ref|XP_006499052.1|;gi|255304936|ref|NP_033006.2|	VVQEYIDAFSDYANFK	VVQEYIDAFS(0.051)DY(0.949)ANFK	Y	12	702;789;798;825	825	0.144196	0.121237	NaN	NaN	-1.70836	NaN	-0.187131	-0.1046	0.949305	9.23e-05	68.481	61.162	68.481	0.040305	16786000
Caveolae-associated protein 1	Ptrf	O54724	gi|6679567|ref|NP_033012.1|	gi|6679567|ref|NP_033012.1|	gi|6679567|ref|NP_033012.1|	SFTPDHVVYAR	SFTPDHVVY(1)AR	Y	9	310	310	-0.673933	0.330158	-0.339794	0.999791	0.0269067	-0.142986	0.0967337	NaN	1	0.000123394	100.88	84.207	100.88	-0.20587	43746000
Caveolae-associated protein 1	Ptrf	O54724	gi|6679567|ref|NP_033012.1|	gi|6679567|ref|NP_033012.1|	gi|6679567|ref|NP_033012.1|	VMIYQDEVKLPAK	VMIY(1)QDEVKLPAK	Y	4	158	158	NaN	0.066634	NaN	0.247042	-0.335411	-0.0171812	NaN	-0.368692	1	0.000122012	69.229	56.961	63.473	-0.037072	15224000
Pituitary tumor-transforming gene 1 protein-interacting protein	Pttg1ip	E0CXX2	gi|755533780|ref|XP_011241564.1|	gi|755533780|ref|XP_011241564.1|	gi|755533780|ref|XP_011241564.1|;gi|22122339|ref|NP_666037.1|	EQNPYEKF	EQNPY(1)EKF	Y	5	108;171	NA	0.522423	-0.0161604	0.261003	0.774132	NaN	0.314059	0.637507	-0.266166	1	0.0164248	70.856	53.616	70.856	0.041935	6384400
Paxillin	Pxn	Q8VI36	gi|21281693|ref|NP_035353.1|	gi|21281693|ref|NP_035353.1|	gi|21281693|ref|NP_035353.1|;gi|568936949|ref|XP_006530270.1|;gi|114326502|ref|NP_598676.2|;gi|568936939|ref|XP_006530265.1|	AGEEEHVYSFPNKQK	AGEEEHVY(0.977)S(0.023)FPNKQK	Y	8	118;118;118;118	118	NaN	-0.900099	-0.646351	4.10824	NaN	-0.621292	-0.111062	-0.533682	0.977174	1e-19	157.47	128.17	122.64	-0.0017595	25068000
Glycogen phosphorylase, brain form	Pygb	Q8CI94	gi|24418919|ref|NP_722476.1|	gi|24418919|ref|NP_722476.1|	gi|24418919|ref|NP_722476.1|	ARPEYMLPVHFYGR	ARPEY(1)MLPVHFYGR	Y	5	197	197	0.230444	-0.191142	-0.464709	-0.94164	0.516239	0.106265	-1.30819	-0.95819	1	2.34e-10	83.087	69.939	78.814	3.1405	16613000
Glycogen phosphorylase, brain form	Pygb	Q8CI94	gi|24418919|ref|NP_722476.1|	gi|24418919|ref|NP_722476.1|	gi|24418919|ref|NP_722476.1|	ARPEYMLPVHFYGR	ARPEYMLPVHFY(1)GR	Y	12	204	204	NaN	NaN	NaN	0.899651	0.902097	NaN	-0.4117	-0.154218	1	4.31e-05	76.759	6.8393	76.759	-0.077654	18549000
Glycogen phosphorylase, brain form	Pygb	Q8CI94	gi|24418919|ref|NP_722476.1|	gi|24418919|ref|NP_722476.1|	gi|24418919|ref|NP_722476.1|	EFYERLPELR	EFY(1)ERLPELR	Y	3	733	733	0.308589	NaN	0.730493	NaN	0.964574	NaN	NaN	0.283768	1	0.00328445	49.3	39.645	49.3	-0.13902	1294500
Glycogen phosphorylase, brain form	Pygb	Q8CI94	gi|24418919|ref|NP_722476.1|	gi|24418919|ref|NP_722476.1|	gi|24418919|ref|NP_722476.1|	QSVFKDFYELEPEKFQNK	QS(0.066)VFKDFY(0.934)ELEPEKFQNK	Y	8	473	473	0.194834	NaN	-0.633687	-1.49769	0.781741	-0.169899	-0.54668	NaN	0.934048	4.66e-05	59.728	55.033	59.728	0.089236	6730100
Glycogen phosphorylase, brain form	Pygb	Q8CI94	gi|24418919|ref|NP_722476.1|;gi|6755256|ref|NP_035354.1|	gi|6755256|ref|NP_035354.1|	gi|24418919|ref|NP_722476.1|;gi|6755256|ref|NP_035354.1|	YGNPWEK	Y(1)GNPWEK	Y	1	186;186	186	NaN	NaN	NaN	-0.326315	-0.00962436	NaN	-5.54791	NaN	1	0.000132874	110.81	83.491	110.81	-0.40914	2890100
Glycogen phosphorylase, muscle form	Pygm	Q9WUB3	gi|6755256|ref|NP_035354.1|	gi|6755256|ref|NP_035354.1|	gi|6755256|ref|NP_035354.1|	ARPEFTLPVHFYGR	ARPEFTLPVHFY(1)GR	Y	12	204	204	0.144196	-0.227397	-0.17606	0.487401	0.682935	0.418897	-0.54993	0.0693075	1	6.53e-06	103.11	89.69	103.11	-0.41475	23712000
Glycogen phosphorylase, muscle form	Pygm	Q9WUB3	gi|6755256|ref|NP_035354.1|	gi|6755256|ref|NP_035354.1|	gi|6755256|ref|NP_035354.1|	FSAYLER	FSAY(1)LER	Y	4	549	549	0.44022	0.235297	0.34932	NaN	NaN	NaN	0.291265	-0.255646	0.99991	0.00808403	65.252	33.963	65.252	0.30691	741140
Glycogen phosphorylase, muscle form	Pygm	Q9WUB3	gi|6755256|ref|NP_035354.1|	gi|6755256|ref|NP_035354.1|	gi|6755256|ref|NP_035354.1|	GYNAQEYYDRIPELR	GYNAQEY(0.89)Y(0.11)DRIPELR	Y	7	732	732	-0.0848601	-0.272359	-0.544572	-0.626329	0.128134	-0.0558823	-0.149886	0.108822	0.890019	5.88e-05	80.96	73.448	80.96	-0.45979	8969900
Glycogen phosphorylase, muscle form	Pygm	Q9WUB3	gi|6755256|ref|NP_035354.1|	gi|6755256|ref|NP_035354.1|	gi|6755256|ref|NP_035354.1|	GYNAQEYYDRIPELR	GYNAQEY(0.5)Y(0.5)DRIPELR	Y	8	733	733	0.105316	-0.0821832	NaN	NaN	NaN	0.134293	NaN	NaN	0.5	6.52e-05	66.004	58.873	66.004	0.001407	3192100
Glycogen phosphorylase, muscle form	Pygm	Q9WUB3	gi|6755256|ref|NP_035354.1|	gi|6755256|ref|NP_035354.1|	gi|6755256|ref|NP_035354.1|	TIFKDFYELEPHKFQNK	TIFKDFY(1)ELEPHKFQNK	Y	7	473	473	0.144196	0.144556	-0.669818	0.171769	0.456929	NaN	NaN	NaN	0.999995	5.08e-05	89.358	79.978	89.358	-0.13175	25753000
Ras-related protein Rab-11A	Rab11a	P62492	gi|31980840|ref|NP_059078.2|	gi|31980840|ref|NP_059078.2|	gi|31980840|ref|NP_059078.2|;gi|6679583|ref|NP_033023.1|	GTRDDEYDYLFK	GT(0.001)RDDEY(0.994)DY(0.006)LFK	Y	7	8;8	8	0.84805	0.868783	-0.0888809	-1.73274	-1.71421	NaN	-0.0658823	NaN	0.993735	5.06e-05	81.565	65.473	81.565	0.081558	33032000
Ras-related protein Rab-11A	Rab11a	P62492	gi|31980840|ref|NP_059078.2|	gi|31980840|ref|NP_059078.2|	gi|31980840|ref|NP_059078.2|;gi|6679583|ref|NP_033023.1|	GTRDDEYDYLFK	GT(0.012)RDDEY(0.446)DY(0.542)LFK	Y	9	10;10	10	NaN	NaN	NaN	NaN	NaN	-0.67096	NaN	NaN	0.542274	0.000663242	45.357	31.348	45.357	-0.16597	8347300
Ras-related protein Rab-1A	Rab1a	P62821	gi|6679587|ref|NP_033022.1|	gi|6679587|ref|NP_033022.1|	gi|6679587|ref|NP_033022.1|	SSMNPEYDYLFK	S(0.002)S(0.002)MNPEY(0.961)DY(0.035)LFK	Y	7	8	8	1.48127	NaN	0.351232	NaN	NaN	NaN	0.793935	NaN	0.961366	0.00033797	57.175	50.488	57.175	-0.39545	5851200
Ras-related protein Rab-1B	Rab1b	Q9D1G1	gi|21313162|ref|NP_083852.1|	gi|21313162|ref|NP_083852.1|	gi|21313162|ref|NP_083852.1|	MNPEYDYLFK	MNPEY(0.964)DY(0.036)LFK	Y	5	5	5	NaN	NaN	-1.29955	NaN	NaN	0.251582	-0.640241	NaN	0.963909	0.000792244	64.374	53.449	64.374	0.018491	17566000
Ras-interacting protein 1	Rasip1	Q3U0S6	gi|61676215|ref|NP_082820.1|	gi|61676215|ref|NP_082820.1|	gi|61676215|ref|NP_082820.1|	IFASGLASGANYK	IFASGLASGANY(1)K	Y	12	158	158	NaN	-0.0362485	NaN	NaN	0.25933	NaN	0.314501	-0.367061	0.999887	6.11e-05	85.554	75.899	85.554	-0.092272	2931600
Radixin	Rdx	P26043	gi|157277950|ref|NP_001098086.1|;gi|70778915|ref|NP_034963.2|;gi|83921618|ref|NP_033536.2|	gi|70778915|ref|NP_034963.2|	gi|157277950|ref|NP_001098086.1|;gi|157277948|ref|NP_033067.2|;gi|70778915|ref|NP_034963.2|;gi|157277952|ref|NP_001098087.1|;gi|83921618|ref|NP_033536.2|	APDFVFYAPR	APDFVFY(1)APR	Y	7	270;270;270;270;270	270	-0.0682242	-0.199356	0.210464	NaN	0.173338	0.0825361	0.0184257	0.260599	1	0.00024389	98.044	81.666	77.662	1.9517	9476200
60S ribosomal protein L10a	Rpl10a	P53026	gi|255003735|ref|NP_035417.2|	gi|255003735|ref|NP_035417.2|	gi|255003735|ref|NP_035417.2|	DTLYEAVR	DT(0.002)LY(0.998)EAVR	Y	4	11	11	-0.804746	-0.0523645	-0.365139	NaN	NaN	-0.443994	0.820271	0.467579	0.998352	0.00154333	51.286	43.676	40.352	-0.21827	1544100
40S ribosomal protein S10	Rps10	P63325	gi|13399310|ref|NP_080239.1|	gi|13399310|ref|NP_080239.1|	gi|13399310|ref|NP_080239.1|;gi|755558856|ref|XP_011244881.1|	IAIYELLFK	IAIY(1)ELLFK	Y	4	12;69	12	-0.539043	-0.00336799	NaN	NaN	-2.10057	-0.658196	-0.856832	-0.167096	1	0.000149747	101.65	73.822	66.568	0.073518	6575400
40S ribosomal protein S27-like	Rps27l	Q6ZWY3	gi|298231238|ref|NP_001177187.1|	gi|298231238|ref|NP_001177187.1|	gi|298231238|ref|NP_001177187.1|;gi|26024336|ref|NP_081291.1|;gi|13385958|ref|NP_080743.1|;gi|1039794007|ref|XP_017169030.1|;gi|902763256|ref|NP_001298030.1|	LVQSPNSYFMDVK	LVQS(0.003)PNS(0.216)Y(0.78)FMDVK	Y	8	31;31;31;31;31	31	NaN	-0.0882334	0.783224	-0.734241	-0.676843	NaN	-0.0974108	NaN	0.780461	0.000819838	50.088	38.717	50.088	1.1787	3820900
Succinate dehydrogenase [ubiquinone] flavoprotein subunit, mitochondrial	Sdha	Q8K2B3	gi|54607098|ref|NP_075770.1|	gi|54607098|ref|NP_075770.1|	gi|54607098|ref|NP_075770.1|	KHTLSYVDIK	KHTLS(0.003)Y(0.997)VDIK	Y	6	629	629	-0.0622833	-0.120043	0.349968	0.312758	NaN	0.916403	NaN	0.409527	0.996946	9.73e-08	124.42	97.636	124.42	-0.39978	3698800
Methanethiol oxidase	Selenbp1	P17563	gi|22164798|ref|NP_033176.2|	gi|22164798|ref|NP_033176.2|	gi|22164798|ref|NP_033176.2|	FYKNAEGTWSVEK	FY(1)KNAEGTWSVEK	Y	2	278	278	NaN	-1.0281	-0.30209	1.80413	NaN	-0.0341739	-0.163256	0.390022	0.999506	0.00136927	50.102	39.156	50.102	-0.24359	2241900
Serine incorporator 5	Serinc5	Q8BHJ6	gi|27369834|ref|NP_766176.1|	gi|27369834|ref|NP_766176.1|	gi|27369834|ref|NP_766176.1|	YGAPELEVAR	Y(1)GAPELEVAR	Y	1	346	346	NaN	NaN	NaN	NaN	-0.00962436	NaN	NaN	NaN	1	0.00761919	48.284	35.247	48.284	-0.20018	257670
Beta-sarcoglycan	Sgcb	P82349	gi|6755482|ref|NP_036020.1|	gi|6755482|ref|NP_036020.1|	gi|6755482|ref|NP_036020.1|	AGYIPIDEDRLHK	AGY(1)IPIDEDRLHK	Y	3	46	46	1.73885	2.01343	1.72712	NaN	NaN	-1.48348	-0.859316	-2.0555	1	7.08e-05	79.492	55.816	79.492	0.37677	3303800
SH2 domain-containing protein 3C	Sh2d3c	Q9QZS8	gi|568913809|ref|XP_006498159.1|	gi|568913809|ref|XP_006498159.1|	gi|568913809|ref|XP_006498159.1|;gi|1039760904|ref|XP_017174430.1|;gi|357527351|ref|NP_001239476.1|;gi|568913807|ref|XP_006498158.1|;gi|7305329|ref|NP_038809.1|	ASPSPSLSSYSDPDSGHYCQLQPPVR	ASPSPSLSSYS(0.001)DPDS(0.044)GHY(0.955)CQLQPPVR	Y	18	141;141;338;476;490	490	NaN	NaN	NaN	0.186275	-0.00962436	NaN	NaN	NaN	0.954746	2.38e-08	84.327	80.796	84.327	-0.30447	5679600
Shank3 splice variant III (Fragment)	Shank3	A0A088DEG0	gi|755551954|ref|XP_006521286.2|	gi|755551954|ref|XP_006521286.2|	gi|755551954|ref|XP_006521286.2|;gi|755551952|ref|XP_006521285.2|;gi|755551950|ref|XP_006521284.2|;gi|755551948|ref|XP_006521283.2|;gi|71896543|ref|NP_067398.2|	PSGPDSPYANLGAFSASLFAPSKPQR	PSGPDS(0.045)PY(0.955)ANLGAFSASLFAPSKPQR	Y	8	930;930;930;922;930	NA	NaN	-0.288892	-0.194359	1.73558	1.79415	NaN	0.286498	NaN	0.954513	2.29e-10	117.61	114.86	117.61	0.83828	17505000
Mitochondrial 2-oxoglutarate/malate carrier protein	Slc25a11	Q9CR62	gi|21312994|ref|NP_077173.1|	gi|21312994|ref|NP_077173.1|	gi|21312994|ref|NP_077173.1|;gi|568975424|ref|XP_006534089.1|	AVVVNAAQLASYSQSK	AVVVNAAQLAS(0.164)Y(0.637)S(0.164)QS(0.034)K	Y	12	202;170	202	0.144196	0.854837	0.391062	NaN	NaN	1.76325	0.557835	1.35884	0.637398	1.59e-19	154.69	139.53	87.519	-0.33232	40181000
Mitochondrial 2-oxoglutarate/malate carrier protein	Slc25a11	Q9CR62	gi|21312994|ref|NP_077173.1|	gi|21312994|ref|NP_077173.1|	gi|21312994|ref|NP_077173.1|;gi|568975424|ref|XP_006534089.1|	LGIYTVLFER	LGIY(1)TVLFER	Y	4	102;70	102	0.309593	0.527533	-0.445287	-1.44521	-0.393135	0.300762	-1.02766	0.315513	0.999767	9.46e-13	166.66	124.32	146.11	-1.3718	54547000
Calcium-binding mitochondrial carrier protein Aralar1	Slc25a12	Q8BH59	gi|27369581|ref|NP_766024.1|	gi|27369581|ref|NP_766024.1|	gi|27369581|ref|NP_766024.1|;gi|755500858|ref|XP_011238155.1|;gi|568918906|ref|XP_006500483.1|	FGLYLPK	FGLY(1)LPK	Y	4	656;567;481	656	-0.453406	-0.120043	NaN	NaN	-0.0288363	-0.00404019	-0.922902	-0.108663	1	0.00628136	73.039	42.854	73.039	0.0382	1069000
Phosphate carrier protein, mitochondrial	Slc25a3	G5E902	gi|568966988|ref|XP_006513434.1|	gi|568966988|ref|XP_006513434.1|	gi|568966988|ref|XP_006513434.1|;gi|19526818|ref|NP_598429.1|	FGFYEVFK	FGFY(1)EVFK	Y	4	137;136	137	0.144196	0.151349	-0.0421878	-1.30713	-0.896098	-0.0132858	-0.477125	0.133309	1	0.00193026	84.498	56.28	52.937	-0.32081	5497700
Phosphate carrier protein, mitochondrial	Slc25a3	G5E902	gi|568966988|ref|XP_006513434.1|	gi|568966988|ref|XP_006513434.1|	gi|568966988|ref|XP_006513434.1|;gi|19526818|ref|NP_598429.1|	TVEALYKFVVPKPR	TVEALY(1)KFVVPKPR	Y	6	242;241	242	NaN	NaN	NaN	NaN	-0.00962436	0.596769	NaN	NaN	0.999918	0.000158261	61.11	51.311	61.11	-2.2268	988350
ADP/ATP translocase 1	Slc25a4	P48962	gi|148747424|ref|NP_031476.3|	gi|148747424|ref|NP_031476.3|	gi|148747424|ref|NP_031476.3|	AAYFGVYDTAK	AAYFGVY(0.999)DT(0.001)AK	Y	7	195	195	-0.150006	-0.417921	0.674264	-0.952619	0.197401	0.563839	-0.0224555	0.219754	0.998585	0.000126175	100.69	90.378	100.69	0.4433	106330000
ADP/ATP translocase 1	Slc25a4	P48962	gi|148747424|ref|NP_031476.3|;gi|22094075|ref|NP_031477.1|	gi|148747424|ref|NP_031476.3|	gi|148747424|ref|NP_031476.3|;gi|254692892|ref|NP_848473.2|;gi|22094075|ref|NP_031477.1|	YFPTQALNFAFK	Y(1)FPTQALNFAFK	Y	1	81;94;81	81	NaN	NaN	NaN	3.0989	3.05832	-1.69329	NaN	NaN	0.999995	3.4e-08	128.71	115.92	91.313	-0.52654	57276000
ADP/ATP translocase 2	Slc25a5	P51881	gi|22094075|ref|NP_031477.1|	gi|22094075|ref|NP_031477.1|	gi|22094075|ref|NP_031477.1|	AAYFGIYDTAK	AAY(0.996)FGIY(0.004)DTAK	Y	3	191	191	-0.0171109	0.025028	NaN	NaN	NaN	0.137296	-0.354517	NaN	0.99612	0.000292181	78.548	68.544	61.344	-0.02391	14450000
ADP/ATP translocase 2	Slc25a5	P51881	gi|22094075|ref|NP_031477.1|	gi|22094075|ref|NP_031477.1|	gi|22094075|ref|NP_031477.1|	AAYFGIYDTAK	AAY(0.075)FGIY(0.92)DT(0.005)AK	Y	7	195	195	NaN	NaN	NaN	NaN	-0.00962436	NaN	NaN	NaN	0.920152	0.000292181	78.548	68.544	75.819	-0.11485	2114700
Sodium-coupled neutral amino acid transporter 2	Slc38a2	Q8CFE6	gi|31543735|ref|NP_780330.2|	gi|31543735|ref|NP_780330.2|	gi|31543735|ref|NP_780330.2|	SHYADVDPENQNFLLESNLGK	S(0.213)HY(0.787)ADVDPENQNFLLESNLGK	Y	3	41	41	0.683407	1.14112	NaN	NaN	NaN	-0.325967	NaN	NaN	0.787318	6.94e-06	55.453	54.044	55.453	0.39448	5456000
Histone-lysine N-methyltransferase Smyd1	Smyd1	G5E8R7	gi|236461142|ref|NP_033892.2|	gi|236461142|ref|NP_033892.2|	gi|236461142|ref|NP_033892.2|;gi|236461014|ref|NP_001153599.1|	QEPVFADTNLYVLR	QEPVFADT(0.047)NLY(0.953)VLR	Y	11	336;349	315	NaN	NaN	NaN	NaN	-0.261334	-0.00380471	NaN	0.586308	0.952509	0.000339859	53.3	39.882	53.3	0.0078748	3455900
Sorbin and SH3 domain-containing protein 1	Sorbs1	Q62417	gi|78000154|ref|NP_001030136.1|	gi|78000154|ref|NP_001030136.1|	gi|78000154|ref|NP_001030136.1|;gi|569006667|ref|XP_006526870.1|;gi|755562981|ref|XP_011245497.1|;gi|755562987|ref|XP_011245500.1|;gi|755562967|ref|XP_011245492.1|;gi|755562985|ref|XP_011245499.1|;gi|569006665|ref|XP_006526869.1|;gi|755562964|ref|XP_011245491.1|;gi|1039757367|ref|XP_017173582.1|;gi|755562957|ref|XP_011245488.1|;gi|755562977|ref|XP_011245495.1|;gi|1039757364|ref|XP_017173581.1|;gi…	SIYEYQPGK	SIY(1)EYQPGK	Y	3	326;54;505;701;731;701;450;731;731;756;489;777;54;777;535;325;54;54;54;731;731;346;346;355;365;372;372;402;425;777;496;505;731;731;777;721;731;738;747;777;777;777;326;326;337;316;356;356;365;316;459;496;731;756	325	-0.267834	-0.286291	0.184396	0.708294	0.88063	0.168071	0.563024	0.417496	0.999813	0.000143448	102.07	80.37	102.07	0.2425	7354600
Sorbin and SH3 domain-containing protein 1	Sorbs1	Q62417	gi|78000154|ref|NP_001030136.1|	gi|78000154|ref|NP_001030136.1|	gi|78000154|ref|NP_001030136.1|;gi|569006667|ref|XP_006526870.1|;gi|755562981|ref|XP_011245497.1|;gi|755562987|ref|XP_011245500.1|;gi|755562967|ref|XP_011245492.1|;gi|755562985|ref|XP_011245499.1|;gi|569006665|ref|XP_006526869.1|;gi|755562964|ref|XP_011245491.1|;gi|1039757367|ref|XP_017173582.1|;gi|755562957|ref|XP_011245488.1|;gi|755562977|ref|XP_011245495.1|;gi|1039757364|ref|XP_017173581.1|;gi…	TPVDYIDLPYSSSPSR	TPVDY(1)IDLPYSSSPSR	Y	5	643;371;906;1018;1048;1080;767;1110;1132;1157;890;1144;860;1178;936;1193;888;944;944;1048;1132;1236;1236;1245;1255;1262;1262;1292;1315;1667;1386;1395;1537;1565;1583;1611;1621;1628;1637;1667;1667;1667;587;587;598;605;617;617;626;627;720;841;992;1017	1193	NaN	-0.537905	NaN	-0.946393	-0.53459	-0.67096	-1.2041	-0.118604	0.99991	0.000126018	96.773	89.455	82.59	0.11462	12167000
NArgBP2	Sorbs2	A0A0S3CWK3	gi|755525452|ref|XP_011240503.1|	gi|755525452|ref|XP_011240503.1|	gi|755525452|ref|XP_011240503.1|;gi|755525450|ref|XP_011240502.1|;gi|755525448|ref|XP_011240501.1|;gi|755525446|ref|XP_011240500.1|;gi|1039789085|ref|XP_017168174.1|;gi|1039789073|ref|XP_017168173.1|;gi|1039789060|ref|XP_017168172.1|;gi|755525462|ref|XP_011240508.1|;gi|755525460|ref|XP_011240507.1|;gi|1039789265|ref|XP_017168179.1|;gi|1039789232|ref|XP_017168176.1|;gi|1039789206|ref|XP_017168175.…	ALDYVQDHSSGVSNEVSIYQSSIDR	ALDYVQDHSSGVSNEVS(0.055)IY(0.926)QS(0.015)S(0.004)IDR	Y	19	632;632;632;632;632;632;632;604;632;604;389;396;376;376;399;404;331;346;346	389	NaN	NaN	NaN	NaN	-0.00962436	NaN	NaN	NaN	0.925937	7.05e-08	80.102	70.153	80.102	0.16729	3519300
NArgBP2	Sorbs2	A0A0S3CWK3	gi|755525452|ref|XP_011240503.1|	gi|755525452|ref|XP_011240503.1|	gi|755525452|ref|XP_011240503.1|;gi|755525450|ref|XP_011240502.1|;gi|755525448|ref|XP_011240501.1|;gi|755525446|ref|XP_011240500.1|;gi|1039789085|ref|XP_017168174.1|;gi|1039789073|ref|XP_017168173.1|;gi|1039789060|ref|XP_017168172.1|;gi|755525462|ref|XP_011240508.1|;gi|755525460|ref|XP_011240507.1|;gi|1039789265|ref|XP_017168179.1|;gi|1039789285|ref|XP_017168180.1|;gi|1039789232|ref|XP_017168176.…	APHYPGIGPVDESGIPTAIR	APHY(0.999)PGIGPVDES(0.001)GIPTAIR	Y	4	377;377;377;377;377;377;377;377;377;377;377;149;141;377;149;149;172;149;172;172;172;118;149;172;172;172;172;118;141;141;149;172;172	149	NaN	NaN	0.417187	0.847044	0.509754	-0.500117	NaN	NaN	0.999235	6.51e-05	46.494	42.107	46.494	-0.017918	3051100
NArgBP2	Sorbs2	A0A0S3CWK3	gi|755525452|ref|XP_011240503.1|	gi|755525452|ref|XP_011240503.1|	gi|755525452|ref|XP_011240503.1|;gi|755525450|ref|XP_011240502.1|;gi|755525448|ref|XP_011240501.1|;gi|755525446|ref|XP_011240500.1|;gi|1039789085|ref|XP_017168174.1|;gi|1039789073|ref|XP_017168173.1|;gi|1039789060|ref|XP_017168172.1|;gi|755525462|ref|XP_011240508.1|;gi|755525460|ref|XP_011240507.1|;gi|1039789265|ref|XP_017168179.1|;gi|1039789285|ref|XP_017168180.1|;gi|1039789232|ref|XP_017168176.…	GAEDYPDPPLPHSYSSDR	GAEDY(1)PDPPLPHSYSSDR	Y	5	1407;1408;1407;1408;1407;1408;1408;852;880;852;833;1164;1172;1307;624;624;647;652;1107;1121;1140;559;590;594;613;1102;1103;522;530;544;552;560;575;906;394	1164	-0.257576	-0.120043	-0.380366	-0.712846	-0.444253	0.316676	1.04786	0.237574	0.999854	9.85e-05	48.899	44.418	48.899	-0.038426	12963000
NArgBP2	Sorbs2	A0A0S3CWK3	gi|755525452|ref|XP_011240503.1|	gi|755525452|ref|XP_011240503.1|	gi|755525452|ref|XP_011240503.1|;gi|755525450|ref|XP_011240502.1|;gi|755525448|ref|XP_011240501.1|;gi|755525446|ref|XP_011240500.1|;gi|1039789085|ref|XP_017168174.1|;gi|1039789073|ref|XP_017168173.1|;gi|1039789060|ref|XP_017168172.1|;gi|755525462|ref|XP_011240508.1|;gi|755525460|ref|XP_011240507.1|;gi|1039789265|ref|XP_017168179.1|;gi|1039789285|ref|XP_017168180.1|;gi|1039789232|ref|XP_017168176.…	SYSSTLTDLGR	S(0.021)Y(0.978)SSTLTDLGR	Y	2	1242;1242;1242;1242;1242;1242;1242;687;715;687;668;999;1006;1142;459;459;482;487;941;956;975;394;425;429;448;937;937;356;364;379;387;395;410;741;229	999	NaN	-0.653871	-0.270135	1.3397	1.57675	-0.342828	-0.04548	-0.211471	0.978388	0.000104664	102.4	78.37	102.4	-0.41265	2994400
Protein sprouty homolog 4	Spry4	Q9WTP2	gi|31543767|ref|NP_036028.2|	gi|31543767|ref|NP_036028.2|	gi|31543767|ref|NP_036028.2|	TSHVENDYIDNPSLAPATGPK	T(0.002)S(0.002)HVENDY(0.993)IDNPS(0.002)LAPATGPK	Y	8	53	53	2.89036	2.89836	NaN	NaN	NaN	-0.0627014	-0.0117821	-1.22645	0.993324	3.57e-05	48.616	46.121	48.616	-0.086901	2425600
Spectrin alpha chain, non-erythrocytic 1	Sptan1	P16546	gi|568913208|ref|XP_006497875.1|	gi|568913208|ref|XP_006497875.1|	gi|568913208|ref|XP_006497875.1|;gi|827475637|ref|NP_001296389.1|;gi|568913204|ref|XP_006497873.1|;gi|568913202|ref|XP_006497872.1|;gi|295054271|ref|NP_001171139.1|;gi|568913216|ref|XP_006497879.1|;gi|568913214|ref|XP_006497878.1|;gi|295054266|ref|NP_001171138.1|;gi|568913212|ref|XP_006497877.1|;gi|568913210|ref|XP_006497876.1|	ALSSEGKPYVTKEELYQNLTR	ALSS(0.002)EGKPY(0.782)VT(0.216)KEELYQNLTR	Y	9	2441;2449;2456;2461;2408;2415;2420;2428;2435;2440	2423	NaN	-0.26851	-0.47868	0.188529	NaN	-0.536356	-0.379227	NaN	0.781537	3.05e-05	92.932	87.863	92.932	0.43564	4960600
Spectrin beta chain, non-erythrocytic 1	Sptbn1	Q62261	gi|568970049|ref|XP_006514664.1|	gi|568970049|ref|XP_006514664.1|	gi|568970049|ref|XP_006514664.1|;gi|568970047|ref|XP_006514663.1|;gi|568970045|ref|XP_006514662.1|;gi|117938332|ref|NP_787030.2|;gi|117938334|ref|NP_033286.2|	HQILEQAVEDYAETVHQLSK	HQILEQAVEDY(0.974)AET(0.025)VHQLS(0.001)K	Y	11	1631;1644;1644;1644;1631	1644	NaN	NaN	NaN	NaN	-0.00962436	NaN	NaN	NaN	0.973794	0.00378026	44.238	41.517	44.238	-1.855	390450
Spectrin beta chain, non-erythrocytic 1	Sptbn1	Q62261	gi|568970049|ref|XP_006514664.1|	gi|568970049|ref|XP_006514664.1|	gi|568970049|ref|XP_006514664.1|;gi|568970047|ref|XP_006514663.1|;gi|568970045|ref|XP_006514662.1|;gi|117938332|ref|NP_787030.2|;gi|117938334|ref|NP_033286.2|	VDKLYAGLKDLAEER	VDKLY(1)AGLKDLAEER	Y	5	1667;1680;1680;1680;1667	1680	0.264125	-0.312313	-0.588855	-0.311164	0.0551005	NaN	-0.260847	-0.726886	1	0.000122517	78.69	69.893	78.69	1.3908	3858100
Sarcalumenin	Srl	Q7TQ48	gi|34328417|ref|NP_780556.2|	gi|34328417|ref|NP_780556.2|	gi|34328417|ref|NP_780556.2|;gi|568994404|ref|XP_006521751.1|;gi|568994402|ref|XP_006521750.1|	ALYADAAPGDKNLLLHYPDGR	ALY(1)ADAAPGDKNLLLHYPDGR	Y	3	56;101;101	56	0.144196	-0.130069	NaN	NaN	2.14064	-0.105731	NaN	NaN	0.999998	1.33e-05	63.998	58.998	63.998	0.27814	1855100
Sarcalumenin	Srl	Q7TQ48	gi|34328417|ref|NP_780556.2|	gi|34328417|ref|NP_780556.2|	gi|34328417|ref|NP_780556.2|;gi|568994404|ref|XP_006521751.1|;gi|568994402|ref|XP_006521750.1|;gi|1039750401|ref|XP_017172334.1|;gi|1039750399|ref|XP_017172333.1|;gi|1039750405|ref|XP_017172336.1|;gi|1039750403|ref|XP_017172335.1|	DIVEDPDKFYIFK	DIVEDPDKFY(1)IFK	Y	10	816;860;861;378;379;337;337	816	-0.0745575	0.0698667	0.262752	0.23423	1.14779	1.07242	0.30325	1.03455	1	5.9e-23	159.5	133.97	40.373	0.061291	94061000
Sarcalumenin	Srl	Q7TQ48	gi|34328417|ref|NP_780556.2|	gi|34328417|ref|NP_780556.2|	gi|34328417|ref|NP_780556.2|;gi|568994404|ref|XP_006521751.1|;gi|568994402|ref|XP_006521750.1|;gi|1039750401|ref|XP_017172334.1|;gi|1039750399|ref|XP_017172333.1|	SHIDKTLMLNEDKPADDYSAVLQR	SHIDKTLMLNEDKPADDY(0.95)S(0.05)AVLQR	Y	18	490;534;535;52;53	490	NaN	NaN	0.734593	-1.7709	NaN	1.23356	0.150394	0.402592	0.950095	1.57e-07	89.468	78.267	81.884	-0.087185	48000000
Sarcalumenin	Srl	Q7TQ48	gi|34328417|ref|NP_780556.2|	gi|34328417|ref|NP_780556.2|	gi|34328417|ref|NP_780556.2|;gi|568994404|ref|XP_006521751.1|;gi|568994402|ref|XP_006521750.1|;gi|1039750401|ref|XP_017172334.1|;gi|1039750399|ref|XP_017172333.1|;gi|1039750405|ref|XP_017172336.1|;gi|1039750403|ref|XP_017172335.1|	YQLYTGAEPTTSEFTVLMHGPK	Y(0.999)QLY(0.001)TGAEPTTSEFTVLMHGPK	Y	1	558;602;603;120;121;79;79	558	0.273768	-0.120043	NaN	1.81333	4.26842	-0.0166251	-1.86722	-0.942011	0.998738	2.27e-06	80.236	67.106	60.621	-0.50277	41889000
Signal transducer and activator of transcription 3	Stat3	P42227	gi|22094115|ref|NP_035616.1|	gi|22094115|ref|NP_035616.1|	gi|22094115|ref|NP_035616.1|;gi|47458804|ref|NP_998824.1|	YCRPESQEHPEADPGSAAPYLK	YCRPESQEHPEADPGSAAPY(1)LK	Y	20	705;705	705	NaN	0.377119	1.21846	0.604522	-3.94015	NaN	NaN	NaN	0.999919	5.21e-06	85.805	80.796	85.805	0.41087	8787900
Signal transducer and activator of transcription 5A	Stat5a	P42230	gi|6755672|ref|NP_035618.1|	gi|6755672|ref|NP_035618.1|	gi|6755672|ref|NP_035618.1|;gi|568972689|ref|XP_006532785.1|;gi|568972687|ref|XP_006532784.1|;gi|1039736369|ref|XP_017169891.1|	AVDGYVKPQIK	AVDGY(1)VKPQIK	Y	5	694;694;694;694	694	-0.955197	0.891384	0.207499	4.22218	NaN	0.122565	-0.00156693	-0.154218	1	5.68e-10	135.8	84.519	94.309	0.54512	35950000
Signal transducer and activator of transcription 5B	Stat5b	P42232	gi|568972691|ref|XP_006532786.1|	gi|568972691|ref|XP_006532786.1|	gi|568972691|ref|XP_006532786.1|;gi|165932368|ref|NP_001107035.1|;gi|165932366|ref|NP_035619.3|;gi|1039736371|ref|XP_017169892.1|	AADGYVKPQIK	AADGY(1)VKPQIK	Y	5	699;699;699;699	699	-1.13313	1.04791	-0.763749	3.57858	NaN	NaN	-0.108259	-0.154218	1	2.11e-10	142.71	108.01	94.692	0.10399	27769000
Succinate-CoA ligase subunit beta (Fragment)	Sucla2	Q3UCC6	gi|46849708|ref|NP_035636.1|	gi|46849708|ref|NP_035636.1|	gi|46849708|ref|NP_035636.1|;gi|568987140|ref|XP_006518820.1|	SSDEAYAIAK	SSDEAY(1)AIAK	Y	6	84;121	91	-0.738124	0.282842	0.355095	-0.184274	NaN	0.938355	0.14138	NaN	1	0.000476945	85.533	61.444	85.533	0.15577	3793200
Tyrosine-protein kinase SYK	Syk	P48025	gi|568982441|ref|XP_006516958.1|	gi|568982441|ref|XP_006516958.1|	gi|568982441|ref|XP_006516958.1|;gi|56550045|ref|NP_035648.2|;gi|312176429|ref|NP_001185906.1|	KPAPPQGSRPESTVSFNPYEPTGGPWGPDR	KPAPPQGS(0.006)RPES(0.006)T(0.006)VS(0.015)FNPY(0.953)EPT(0.015)GGPWGPDR	Y	19	317;317;317	317	-0.766071	-1.46166	-0.406847	0.276327	1.49452	-0.67096	NaN	-0.0584095	0.953034	8.27e-09	45.558	44.27	45.558	-0.065545	6343800
Protein-glutamine gamma-glutamyltransferase 2	Tgm2	P21981	gi|6678329|ref|NP_033399.1|	gi|6678329|ref|NP_033399.1|	gi|6678329|ref|NP_033399.1|	SEGTYCCGPVSVR	S(0.003)EGT(0.046)Y(0.951)CCGPVSVR	Y	5	369	369	0.144196	-0.0127344	0.0966236	NaN	NaN	-0.359313	0.439136	0.189898	0.950877	0.000819838	50.088	42.723	50.088	-0.7084	1892600
Tight junction protein ZO-1	Tjp1	P39447	gi|254675279|ref|NP_001157046.1|	gi|254675279|ref|NP_001157046.1|	gi|254675279|ref|NP_001157046.1|;gi|254675277|ref|NP_033412.2|;gi|568947663|ref|XP_006540849.1|;gi|568947661|ref|XP_006540848.1|;gi|568947659|ref|XP_006540847.1|;gi|568947657|ref|XP_006540846.1|;gi|568947655|ref|XP_006540845.1|;gi|755520896|ref|XP_011249145.1|;gi|568947653|ref|XP_006540844.1|;gi|568947651|ref|XP_006540843.1|;gi|568947649|ref|XP_006540842.1|;gi|568947647|ref|XP_006540841.1|	HEEQPAPAYEVHNR	HEEQPAPAY(1)EVHNR	Y	9	1084;1164;1177;1177;1164;1177;1257;1257;1257;1257;1257;1257	1164	NaN	NaN	NaN	NaN	-0.00962436	NaN	NaN	NaN	1	5.51e-05	70.26	62.189	70.26	-0.3093	450750
Talin-1	Tln1	P26039	gi|755506255|ref|XP_006537832.2|	gi|755506255|ref|XP_006537832.2|	gi|755506255|ref|XP_006537832.2|;gi|227116327|ref|NP_035732.2|;gi|755506253|ref|XP_006537831.2|;gi|568926386|ref|XP_006537833.1|	ALDYYMLR	ALDY(0.903)Y(0.097)MLR	Y	4	70;70;70;70	70	1.37897	1.58743	0.868958	NaN	NaN	-0.74133	-0.106876	-0.154218	0.903117	0.00417726	73.26	64.302	73.26	0.3724	5088000
Talin-1	Tln1	P26039	gi|755506255|ref|XP_006537832.2|	gi|755506255|ref|XP_006537832.2|	gi|755506255|ref|XP_006537832.2|;gi|227116327|ref|NP_035732.2|;gi|755506253|ref|XP_006537831.2|;gi|568926386|ref|XP_006537833.1|	LLGEIAQGNENYAGIAAR	LLGEIAQGNENY(1)AGIAAR	Y	12	1116;1116;1133;1133	1116	NaN	1.44499	0.916056	NaN	NaN	-0.209522	0.286544	NaN	1	0.000134784	46.249	36.966	45.618	-0.48262	3563800
Talin-2	Tln2	Q71LX4	gi|755530455|ref|XP_011241115.1|	gi|755530455|ref|XP_011241115.1|	gi|755530455|ref|XP_011241115.1|;gi|755530453|ref|XP_011241114.1|;gi|163310736|ref|NP_001074711.2|;gi|568962056|ref|XP_006511501.1|;gi|755530450|ref|XP_011241113.1|;gi|568962048|ref|XP_006511497.1|;gi|568962046|ref|XP_006511496.1|;gi|568962062|ref|XP_006511504.1|	ECDYSIDGINR	ECDY(0.992)S(0.008)IDGINR	Y	4	1667;1667;1665;1667;1667;1667;1667;513	1666	NaN	0.0583203	0.712488	NaN	NaN	NaN	NaN	NaN	0.991936	0.00313671	45.829	35.824	45.829	-2.1854	542630
Activated CDC42 kinase 1	Tnk2	O54967	gi|575403007|ref|NP_001276372.1|	gi|575403007|ref|NP_001276372.1|	gi|575403007|ref|NP_001276372.1|;gi|568995778|ref|XP_006522408.1|;gi|568995776|ref|XP_006522407.1|;gi|568995774|ref|XP_006522406.1|;gi|568995772|ref|XP_006522405.1|;gi|755553761|ref|XP_011244248.1|;gi|158711694|ref|NP_001103617.1|;gi|568995768|ref|XP_006522403.1|;gi|1039751427|ref|XP_017172555.1|;gi|568995766|ref|XP_006522402.1|;gi|568995764|ref|XP_006522401.1|;gi|158711692|ref|NP_058068.2|;gi|56…	YATPQVIQAPGPR	Y(1)ATPQVIQAPGPR	Y	1	337;337;352;352;434;672;827;859;827;866;874;842;859;859;859;866;874;874;874	842	NaN	NaN	NaN	-0.940503	-0.792612	NaN	NaN	NaN	0.99967	1.02e-08	125.72	106.06	125.72	0.16309	4194700
Troponin C, slow skeletal and cardiac muscles	Tnnc1	P19123	gi|6678369|ref|NP_033419.1|	gi|6678369|ref|NP_033419.1|	gi|6678369|ref|NP_033419.1|	MDDIYKAAVEQLTEEQKNEFK	MDDIY(1)KAAVEQLTEEQKNEFK	Y	5	5	5	NaN	1.05077	NaN	-1.44521	-1.4015	NaN	NaN	NaN	0.999949	3.25e-06	65.149	61.346	65.149	-0.26773	6801500
Troponin I, cardiac muscle	Tnni3	P48787	gi|6678393|ref|NP_033432.1|	gi|6678393|ref|NP_033432.1|	gi|6678393|ref|NP_033432.1|;gi|1039777946|ref|XP_017177599.1|	NITEIADLTQKIYDLR	NITEIADLTQKIY(1)DLR	Y	13	134;142	134	-0.08475	-0.120043	-0.329018	0.73907	0.123021	-0.216171	-0.870397	0.00214939	0.999996	8.81e-85	216.71	188.16	216.71	0.23063	90370000
Troponin I, cardiac muscle	Tnni3	P48787	gi|6678393|ref|NP_033432.1|	gi|6678393|ref|NP_033432.1|	gi|6678393|ref|NP_033432.1|;gi|1039777946|ref|XP_017177599.1|	VDKVDEERYDVEAK	VDKVDEERY(1)DVEAK	Y	9	113;121	113	1.90587	NaN	-0.103366	NaN	NaN	0.219602	NaN	0.0620682	1	0.0011898	42.317	28.571	42.317	0.11696	987150
Serine/threonine-protein kinase TNNI3K	Tnni3k	Q5GIG6	gi|260166668|ref|NP_796040.3|	gi|260166668|ref|NP_796040.3|	gi|260166668|ref|NP_796040.3|	SRFELEYALNAR	SRFELEY(1)ALNAR	Y	7	770	770	-0.0676511	0.579928	NaN	2.74837	2.46529	-0.841828	0.116751	-0.154218	1	4.14e-13	147.73	97.798	108.72	-0.39982	10740000
Serine/threonine-protein kinase TNNI3K	Tnni3k	Q5GIG6	gi|260166668|ref|NP_796040.3|	gi|260166668|ref|NP_796040.3|	gi|260166668|ref|NP_796040.3|	SYTGWPQSVGTHTNPGLSLEEMNR	S(0.233)Y(0.744)T(0.023)GWPQSVGTHTNPGLSLEEMNR	Y	2	777	777	NaN	NaN	NaN	2.0372	1.96933	NaN	-0.834924	-1.03071	0.743731	5.43e-06	50.776	43.496	50.776	-0.011679	4733900
Serine/threonine-protein kinase TNNI3K	Tnni3k	Q5GIG6	gi|260166668|ref|NP_796040.3|	gi|260166668|ref|NP_796040.3|	gi|260166668|ref|NP_796040.3|	YGYVSDPMSPMHLHSR	Y(0.132)GY(0.863)VS(0.005)DPMSPMHLHSR	Y	3	811	811	NaN	NaN	NaN	0.824088	0.619263	NaN	-2.51637	NaN	0.863175	8.18e-05	81.448	69.547	81.448	-0.771	7432800
Tensin 1	Tns1	E9Q0S6	gi|568906164|ref|XP_006495946.1|	gi|568906164|ref|XP_006495946.1|	gi|568906164|ref|XP_006495946.1|;gi|1039728377|ref|XP_017175355.1|;gi|755492315|ref|XP_011236779.1|;gi|755492312|ref|XP_011236778.1|;gi|568906162|ref|XP_006495945.1|;gi|568906160|ref|XP_006495944.1|;gi|568906158|ref|XP_006495943.1|;gi|568906156|ref|XP_006495942.1|;gi|568906154|ref|XP_006495941.1|;gi|568906152|ref|XP_006495940.1|;gi|1039728375|ref|XP_017175354.1|;gi|755492305|ref|XP_006495936.2|;g…	AGSLPNYATINGK	AGSLPNY(0.997)AT(0.003)INGK	Y	7	959;1421;1438;1438;1438;1438;1438;1438;1438;1438;1473;1498;1499;1514;1537;1541;1543;1547;1549;1558;1562;1564;1568;1571;1579;1584;1588;1590;1592	1558	-1.22826	-0.382105	0.390846	4.36403	4.48579	-0.348333	-0.297335	-0.154218	0.996675	1.33e-06	118.61	98.177	118.61	-2.1702	23767000
Tensin 1	Tns1	E9Q0S6	gi|568906164|ref|XP_006495946.1|	gi|568906164|ref|XP_006495946.1|	gi|568906164|ref|XP_006495946.1|;gi|1039728377|ref|XP_017175355.1|;gi|755492315|ref|XP_011236779.1|;gi|755492312|ref|XP_011236778.1|;gi|568906162|ref|XP_006495945.1|;gi|568906160|ref|XP_006495944.1|;gi|568906158|ref|XP_006495943.1|;gi|568906156|ref|XP_006495942.1|;gi|568906154|ref|XP_006495941.1|;gi|568906152|ref|XP_006495940.1|;gi|1039728375|ref|XP_017175354.1|;gi|755492305|ref|XP_006495936.2|;g…	HAAYGGYSTPEDR	HAAYGGY(0.956)S(0.036)T(0.008)PEDR	Y	7	881;1343;1360;1360;1360;1360;1360;1360;1360;1360;1395;1420;1421;1436;1459;1463;1465;1469;1471;1480;1484;1486;1490;1493;1501;1506;1510;1512;1514	1480	NaN	-1.5999	NaN	3.31395	NaN	-0.606359	-0.0258315	NaN	0.955555	2.77e-05	93.348	87.807	93.348	0.20732	2251500
Tensin-2	Tns2	Q8CGB6	gi|568991879|ref|XP_006520757.1|	gi|568991879|ref|XP_006520757.1|	gi|568991879|ref|XP_006520757.1|;gi|568991877|ref|XP_006520756.1|;gi|568991875|ref|XP_006520755.1|;gi|119372288|ref|NP_705761.2|;gi|755551288|ref|XP_011243839.1|;gi|568991873|ref|XP_006520754.1|	GPLDGSPYAQVQR	GPLDGS(0.001)PY(0.999)AQVQR	Y	8	460;460;483;483;483;483	483	0.829517	0.680599	0.60009	1.09813	-4.9471	-0.272421	1.17178	0.0650849	0.998839	6.91e-09	128.85	115.69	128.85	-0.21599	88930000
Tensin-2	Tns2	Q8CGB6	gi|568991879|ref|XP_006520757.1|	gi|568991879|ref|XP_006520757.1|	gi|568991879|ref|XP_006520757.1|;gi|568991877|ref|XP_006520756.1|;gi|568991875|ref|XP_006520755.1|;gi|119372288|ref|NP_705761.2|;gi|755551288|ref|XP_011243839.1|;gi|568991873|ref|XP_006520754.1|	LALPTAALYGLR	LALPT(0.001)AALY(0.999)GLR	Y	9	682;682;705;705;705;705	705	NaN	NaN	NaN	-0.774676	-1.3018	NaN	NaN	NaN	0.998844	0.000115353	85.813	73.544	60.255	0.38212	2100200
Tropomyosin alpha-1 chain	Tpm1	P58771	gi|256000780|ref|NP_001157720.1|	gi|256000780|ref|NP_001157720.1|	gi|256000780|ref|NP_001157720.1|;gi|256000786|ref|NP_001157723.1|;gi|256000794|ref|NP_001157727.1|;gi|31560030|ref|NP_077745.2|;gi|568961217|ref|XP_006511103.1|;gi|256000784|ref|NP_001157722.1|;gi|755530022|ref|XP_011241017.1|;gi|568961221|ref|XP_006511105.1|;gi|256000792|ref|NP_001157726.1|;gi|568961219|ref|XP_006511104.1|;gi|568961223|ref|XP_006511106.1|;gi|568961227|ref|XP_006511108.1|;gi|2560…	HIAEDADRKYEEVAR	HIAEDADRKY(1)EEVAR	Y	10	162;162;162;162;162;162;162;162;126;162;162;162;162;162;126;126;126;126;162;162;162;162;126;126;126	162	0.149749	NaN	0.452983	1.88082	-1.49658	2.63807	NaN	NaN	1	3.6e-99	226.19	193.48	70.26	-0.36589	31844000
Tropomyosin alpha-1 chain	Tpm1	P58771	gi|256000780|ref|NP_001157720.1|	gi|256000780|ref|NP_001157720.1|	gi|256000780|ref|NP_001157720.1|;gi|256000786|ref|NP_001157723.1|;gi|568961221|ref|XP_006511105.1|;gi|256000792|ref|NP_001157726.1|;gi|568961219|ref|XP_006511104.1|;gi|568961223|ref|XP_006511106.1|;gi|568961237|ref|XP_006511113.1|	SIDDLEDELYAQKLK	SIDDLEDELY(1)AQKLK	Y	10	261;261;261;225;261;261;225	261	-0.232781	-0.184411	-0.380956	-0.273422	0.0519932	0.47575	-0.637047	0.496939	1	1.32e-18	149.32	119.97	149.32	-0.18585	57153000
Tropomyosin alpha-1 chain	Tpm1	P58771	gi|256000780|ref|NP_001157720.1|	gi|256000780|ref|NP_001157720.1|	gi|256000780|ref|NP_001157720.1|;gi|256000786|ref|NP_001157723.1|;gi|568961221|ref|XP_006511105.1|;gi|256000792|ref|NP_001157726.1|;gi|568961223|ref|XP_006511106.1|	YKAISEELDHALNDMTSI	Y(0.983)KAIS(0.017)EELDHALNDMTSI	Y	1	267;267;267;231;267	267	-1.74867	NaN	-0.841792	-1.00447	0.0507923	-0.0941213	-2.45462	0.263837	0.982942	0.000259374	46.249	44.251	46.249	-1.1938	10485000
Tropomyosin alpha-4 chain	Tpm4	Q6IRU2	gi|47894398|ref|NP_001001491.1|	gi|47894398|ref|NP_001001491.1|	gi|47894398|ref|NP_001001491.1|	HITDEADRKYEEVAR	HITDEADRKY(1)EEVAR	Y	10	126	126	-0.00117254	0.592221	NaN	NaN	NaN	-0.123645	-0.427142	-0.941455	0.999636	0.000645324	58.32	43.44	58.32	-0.39192	852020
Trem-like transcript 1 protein	Treml1	Q8K558	gi|575402988|ref|NP_001276386.1|	gi|575402988|ref|NP_001276386.1|	gi|575402988|ref|NP_001276386.1|;gi|58037247|ref|NP_082039.1|	SVTYATVVFPGGDKGK	S(0.001)VT(0.004)Y(0.995)ATVVFPGGDKGK	Y	4	286;291	286	-0.500404	-0.408282	-0.325174	1.28721	0.89625	0.222796	1.30686	-0.0768829	0.994988	2.4e-08	128.71	115.75	128.71	-0.039284	37516000
Titin	Ttn	A2ASS6	gi|755499202|ref|XP_011237740.1|	gi|755499202|ref|XP_011237740.1|	gi|755499202|ref|XP_011237740.1|;gi|1039759925|ref|XP_017172628.1|;gi|77812699|ref|NP_082280.2|;gi|77812697|ref|NP_035782.3|	AAWYTIDSR	AAWY(0.951)T(0.049)IDSR	Y	4	31158;32101;23738;30319	32065	NaN	NaN	NaN	-1.24935	-0.23632	NaN	NaN	NaN	0.95064	0.00579304	52.725	45.446	52.725	0.063796	1862400
Titin	Ttn	A2ASS6	gi|755499202|ref|XP_011237740.1|	gi|755499202|ref|XP_011237740.1|	gi|755499202|ref|XP_011237740.1|;gi|1039759925|ref|XP_017172628.1|;gi|77812699|ref|NP_082280.2|;gi|77812697|ref|NP_035782.3|	ANLLANNEYYFR	ANLLANNEY(0.006)Y(0.994)FR	Y	10	18953;19896;11533;18114	19860	-0.148026	-0.0807625	-0.515808	-0.0884527	-0.0500049	0.745133	-0.669788	0.462758	0.993662	6.02e-41	193.28	175.62	164.04	-0.8533	154340000
Titin	Ttn	A2ASS6	gi|755499202|ref|XP_011237740.1|	gi|755499202|ref|XP_011237740.1|	gi|755499202|ref|XP_011237740.1|;gi|1039759925|ref|XP_017172628.1|;gi|77812699|ref|NP_082280.2|;gi|77812697|ref|NP_035782.3|	YGIGEPLESEPVVAK	Y(1)GIGEPLESEPVVAK	Y	1	27928;28871;20508;27089	28835	0.010916	0.00195841	NaN	0.487337	NaN	NaN	0.336041	NaN	0.999948	6.43e-05	47.774	39.224	47.774	0.66113	12348000
Titin	Ttn	A2ASS6	gi|755499202|ref|XP_011237740.1|	gi|755499202|ref|XP_011237740.1|	gi|755499202|ref|XP_011237740.1|;gi|1039759925|ref|XP_017172628.1|;gi|77812699|ref|NP_082280.2|;gi|77812697|ref|NP_035782.3|	AWTPVTYTVTR	AWT(0.001)PVT(0.14)Y(0.506)T(0.14)VT(0.215)R	Y	7	17550;18493;10130;16711	18457	NaN	NaN	NaN	NaN	NaN	0.0698836	-0.78155	NaN	0.505679	0.00260272	48.568	38.09	48.568	1.1784	4657700
Titin	Ttn	A2ASS6	gi|755499202|ref|XP_011237740.1|	gi|755499202|ref|XP_011237740.1|	gi|755499202|ref|XP_011237740.1|;gi|1039759925|ref|XP_017172628.1|;gi|77812699|ref|NP_082280.2|;gi|77812697|ref|NP_035782.3|	VTGYPQPK	VTGY(1)PQPK	Y	4	1873;1873;1827;1873	1873	0.0197994	0.40961	-0.250694	-0.0534809	1.88218	-0.151465	0.529596	-0.457151	0.999972	0.000816646	70.808	49.436	65.252	-0.30731	10176000
Titin	Ttn	A2ASS6	gi|755499202|ref|XP_011237740.1|	gi|755499202|ref|XP_011237740.1|	gi|755499202|ref|XP_011237740.1|;gi|1039759925|ref|XP_017172628.1|;gi|77812699|ref|NP_082280.2|;gi|77812697|ref|NP_035782.3|	DGLPLKESEYVR	DGLPLKES(0.031)EY(0.969)VR	Y	10	28491;29434;21071;27652	29398	-0.933931	NaN	NaN	0.63832	0.470796	0.0340215	-0.430821	-0.87957	0.969487	3.56e-07	117.86	110.49	99.5	-0.48498	16371000
Titin	Ttn	A2ASS6	gi|755499202|ref|XP_011237740.1|	gi|755499202|ref|XP_011237740.1|	gi|755499202|ref|XP_011237740.1|;gi|1039759925|ref|XP_017172628.1|;gi|77812699|ref|NP_082280.2|;gi|77812697|ref|NP_035782.3|	EKANVKWYR	EKANVKWY(1)R	Y	8	13738;14681;6318;12899	14645	-0.235909	0.263299	0.494976	-0.141615	NaN	1.23889	0.881984	-0.223057	1	0.00821045	48.794	40.1	48.794	-0.55498	2286600
Titin	Ttn	A2ASS6	gi|755499202|ref|XP_011237740.1|	gi|755499202|ref|XP_011237740.1|	gi|755499202|ref|XP_011237740.1|;gi|1039759925|ref|XP_017172628.1|;gi|77812699|ref|NP_082280.2|;gi|77812697|ref|NP_035782.3|	YGVGDPILTEPAIAK	Y(1)GVGDPILTEPAIAK	Y	1	20350;21293;12930;19511	21257	0.00117159	NaN	0.258587	1.14435	2.33769	1.9398	NaN	NaN	0.999993	1.9e-05	69.747	62.737	58.32	-0.70159	15535000
Titin	Ttn	A2ASS6	gi|755499202|ref|XP_011237740.1|	gi|755499202|ref|XP_011237740.1|	gi|755499202|ref|XP_011237740.1|;gi|1039759925|ref|XP_017172628.1|;gi|77812699|ref|NP_082280.2|;gi|77812697|ref|NP_035782.3|	IDADIYGKPIPTTQWVK	IDADIY(0.999)GKPIPT(0.001)TQWVK	Y	6	23450;24393;16030;22611	24357	0.267753	-0.255182	0.571025	0.743166	1.29924	NaN	0.66406	0.608633	0.998887	9.11e-05	50.188	40.048	50.188	0.2356	11587000
Titin	Ttn	A2ASS6	gi|755499202|ref|XP_011237740.1|	gi|755499202|ref|XP_011237740.1|	gi|755499202|ref|XP_011237740.1|;gi|1039759925|ref|XP_017172628.1|;gi|77812699|ref|NP_082280.2|;gi|77812697|ref|NP_035782.3|	IENLQEGCSYYFR	IENLQEGCS(0.03)Y(0.134)Y(0.836)FR	Y	11	26151;27094;18731;25312	27058	NaN	-0.00187652	-1.1917	-1.63943	NaN	0.448909	-0.586084	0.363398	0.836429	1.82e-06	116.51	26.099	96.059	0.28284	50056000
Titin	Ttn	A2ASS6	gi|755499202|ref|XP_011237740.1|	gi|755499202|ref|XP_011237740.1|	gi|755499202|ref|XP_011237740.1|;gi|1039759925|ref|XP_017172628.1|;gi|77812699|ref|NP_082280.2|;gi|77812697|ref|NP_035782.3|	IGYSDPSDVPDKHCPK	IGY(0.983)S(0.017)DPSDVPDKHCPK	Y	3	20554;21497;13134;19715	21461	-0.576845	-0.0372333	-1.45802	0.609233	NaN	-0.19222	0.160548	-0.242073	0.982953	8.03e-05	101.3	98.107	101.3	0.24841	8097200
Titin	Ttn	A2ASS6	gi|755499202|ref|XP_011237740.1|	gi|755499202|ref|XP_011237740.1|	gi|755499202|ref|XP_011237740.1|;gi|1039759925|ref|XP_017172628.1|;gi|77812699|ref|NP_082280.2|;gi|77812697|ref|NP_035782.3|	ILVPSTGYPRPK	ILVPS(0.012)T(0.044)GY(0.944)PRPK	Y	8	14303;15246;6883;13464	15210	NaN	-0.312936	-0.632312	0.531062	1.02676	NaN	0.167085	0.0875326	0.943816	0.000800601	52.247	38.012	49.632	-0.2486	5927200
Titin	Ttn	A2ASS6	gi|755499202|ref|XP_011237740.1|	gi|755499202|ref|XP_011237740.1|	gi|755499202|ref|XP_011237740.1|;gi|1039759925|ref|XP_017172628.1|;gi|77812699|ref|NP_082280.2|;gi|77812697|ref|NP_035782.3|	INKMYADR	INKMY(1)ADR	Y	5	20283;21226;12863;19444	21190	NaN	-2.68832	NaN	NaN	NaN	-0.142065	0.361678	-0.154218	1	0.0112989	56.432	33.79	56.432	-0.41635	1621600
Titin	Ttn	A2ASS6	gi|755499202|ref|XP_011237740.1|	gi|755499202|ref|XP_011237740.1|	gi|755499202|ref|XP_011237740.1|;gi|1039759925|ref|XP_017172628.1|;gi|77812699|ref|NP_082280.2|;gi|77812697|ref|NP_035782.3|	IRDQYEMPGKLDR	IRDQY(1)EMPGKLDR	Y	5	32891;33834;25471;32052	33798	-0.0381432	-0.30812	NaN	2.36019	NaN	NaN	0.978617	0.401028	1	0.000388518	55.724	48.891	41.621	0.078701	6184100
Titin	Ttn	A2ASS6	gi|755499202|ref|XP_011237740.1|	gi|755499202|ref|XP_011237740.1|	gi|755499202|ref|XP_011237740.1|;gi|1039759925|ref|XP_017172628.1|;gi|77812699|ref|NP_082280.2|;gi|77812697|ref|NP_035782.3|	ISGLVEGTMYYFR	ISGLVEGT(0.005)MY(0.138)Y(0.857)FR	Y	11	30490;31433;23070;29651	31397	0.144196	NaN	NaN	NaN	-0.666772	NaN	-0.627302	NaN	0.856504	8.22e-07	69.03	55.284	69.03	-0.94919	2128000
Titin	Ttn	A2ASS6	gi|755499202|ref|XP_011237740.1|	gi|755499202|ref|XP_011237740.1|	gi|755499202|ref|XP_011237740.1|;gi|1039759925|ref|XP_017172628.1|;gi|77812699|ref|NP_082280.2|;gi|77812697|ref|NP_035782.3|	KSYAAVVTNCHK	KS(0.081)Y(0.919)AAVVTNCHK	Y	3	23962;24905;16542;23123	24869	NaN	NaN	NaN	NaN	-0.00962436	NaN	NaN	NaN	0.919321	0.000163149	71.076	61.233	71.076	-0.26814	833420
Titin	Ttn	A2ASS6	gi|755499202|ref|XP_011237740.1|	gi|755499202|ref|XP_011237740.1|	gi|755499202|ref|XP_011237740.1|;gi|1039759925|ref|XP_017172628.1|;gi|77812699|ref|NP_082280.2|;gi|77812697|ref|NP_035782.3|	LIKEIEYR	LIKEIEY(1)R	Y	7	1262;1262;1216;1262	1262	-0.378174	0.527906	-0.0870613	0.86881	-0.275418	0.739933	-0.146912	NaN	1	0.00817587	62.582	18.265	62.582	-0.93901	1307500
Titin	Ttn	A2ASS6	gi|755499202|ref|XP_011237740.1|	gi|755499202|ref|XP_011237740.1|	gi|755499202|ref|XP_011237740.1|;gi|1039759925|ref|XP_017172628.1|;gi|77812699|ref|NP_082280.2|;gi|77812697|ref|NP_035782.3|	LLERPPEFTLPLYNK	LLERPPEFTLPLY(1)NK	Y	13	32578;33521;25158;31739	33485	-0.207011	0.371193	-0.0581578	-0.460587	NaN	-0.38873	NaN	0.298851	0.999978	0.000115657	55.724	52.668	55.724	-0.14236	5258800
Titin	Ttn	A2ASS6	gi|755499202|ref|XP_011237740.1|	gi|755499202|ref|XP_011237740.1|	gi|755499202|ref|XP_011237740.1|;gi|1039759925|ref|XP_017172628.1|;gi|77812699|ref|NP_082280.2|;gi|77812697|ref|NP_035782.3|	LSEYKSELDYMSKEEK	LSEYKSELDY(1)MSKEEK	Y	10	33106;34049;25686;32267	34013	0.561499	0.97655	0.5103	0.384085	-0.38884	0.951942	-0.320336	-0.154218	0.999821	1.79e-19	154.46	133.49	154.46	-0.96338	90836000
Titin	Ttn	A2ASS6	gi|755499202|ref|XP_011237740.1|	gi|755499202|ref|XP_011237740.1|	gi|755499202|ref|XP_011237740.1|;gi|1039759925|ref|XP_017172628.1|;gi|77812699|ref|NP_082280.2|;gi|77812697|ref|NP_035782.3|	LSWTQVSNEVQALNYKVTK	LSWTQVSNEVQALNY(0.844)KVT(0.156)K	Y	15	25743;26686;18323;24904	26650	NaN	NaN	NaN	NaN	NaN	-0.67096	NaN	NaN	0.843786	0.00757121	41.31	38.509	41.31	-0.36726	3264800
Titin	Ttn	A2ASS6	gi|755499202|ref|XP_011237740.1|	gi|755499202|ref|XP_011237740.1|	gi|755499202|ref|XP_011237740.1|;gi|1039759925|ref|XP_017172628.1|;gi|77812699|ref|NP_082280.2|;gi|77812697|ref|NP_035782.3|	LSYKVTNLQEGAIYYFR	LS(0.053)Y(0.946)KVTNLQEGAIYYFR	Y	3	27218;28161;19798;26379	28125	-0.576159	-0.10235	NaN	-0.234144	0.122362	-0.503675	-1.39386	NaN	0.946431	3.33e-06	95.236	86.178	46.892	0.072936	14326000
Titin	Ttn	A2ASS6	gi|755499202|ref|XP_011237740.1|	gi|755499202|ref|XP_011237740.1|	gi|755499202|ref|XP_011237740.1|;gi|1039759925|ref|XP_017172628.1|;gi|77812699|ref|NP_082280.2|;gi|77812697|ref|NP_035782.3|	VTNLQEGAIYYFR	VTNLQEGAIY(0.011)Y(0.989)FR	Y	11	27230;28173;19810;26391	28137	-0.322121	-0.120043	-1.33119	NaN	0.0290958	-0.338057	-0.856987	0.126925	0.989175	1.1e-18	152.4	125.87	152.4	-0.32138	25833000
Titin	Ttn	A2ASS6	gi|755499202|ref|XP_011237740.1|	gi|755499202|ref|XP_011237740.1|	gi|755499202|ref|XP_011237740.1|;gi|1039759925|ref|XP_017172628.1|;gi|77812699|ref|NP_082280.2|;gi|77812697|ref|NP_035782.3|	NSWKIDQLQEGCSYYFR	NSWKIDQLQEGCS(0.056)Y(0.186)Y(0.757)FR	Y	15	23986;24929;16566;23147	24893	NaN	1.34165	-0.510154	-1.44521	NaN	1.24062	NaN	NaN	0.757391	3.18e-05	56.424	45.563	54.004	-0.35326	5307200
Titin	Ttn	A2ASS6	gi|755499202|ref|XP_011237740.1|	gi|755499202|ref|XP_011237740.1|	gi|755499202|ref|XP_011237740.1|;gi|1039759925|ref|XP_017172628.1|;gi|77812699|ref|NP_082280.2|;gi|77812697|ref|NP_035782.3|	NVHVEVYDRPSPPR	NVHVEVY(0.956)DRPS(0.044)PPR	Y	7	16377;17320;8957;15538	17284	NaN	NaN	NaN	-0.0368731	NaN	-1.34288	-1.37595	NaN	0.956218	0.000390499	48.527	39.961	43.03	-0.93341	5084900
Titin	Ttn	A2ASS6	gi|755499202|ref|XP_011237740.1|	gi|755499202|ref|XP_011237740.1|	gi|755499202|ref|XP_011237740.1|;gi|1039759925|ref|XP_017172628.1|;gi|77812699|ref|NP_082280.2|;gi|77812697|ref|NP_035782.3|	RRTPSPDYDLYYYR	RRT(1)PS(1)PDY(1)DLYYYR	Y	8	32957;33900;25537;32118	33864	0.622864	NaN	0.19474	-3.32709	NaN	0.706967	0.186078	0.433435	0.999947	1.56e-05	101.3	93.172	97.095	0.24686	662130000
Titin	Ttn	A2ASS6	gi|755499202|ref|XP_011237740.1|	gi|755499202|ref|XP_011237740.1|	gi|755499202|ref|XP_011237740.1|;gi|1039759925|ref|XP_017172628.1|;gi|77812699|ref|NP_082280.2|;gi|77812697|ref|NP_035782.3|	TPSPDYDLYYYRR	T(0.041)PS(0.958)PDY(0.004)DLY(0.969)Y(0.026)Y(0.001)RR	Y	9	32960;33903;25540;32121	33867	-0.382308	-0.139482	-1.04221	NaN	0.00955597	-0.0879127	-0.0732795	0.42373	0.968801	9.9e-08	123.76	116.81	85.909	0.6677	35961000
Titin	Ttn	A2ASS6	gi|755499202|ref|XP_011237740.1|	gi|755499202|ref|XP_011237740.1|	gi|755499202|ref|XP_011237740.1|;gi|1039759925|ref|XP_017172628.1|;gi|77812699|ref|NP_082280.2|;gi|77812697|ref|NP_035782.3|	TAYVGENVR	TAY(1)VGENVR	Y	3	32583;33526;25163;31744	33490	NaN	NaN	NaN	NaN	NaN	1.53334	NaN	NaN	0.999924	0.000517618	90.15	71.711	63.816	-0.036229	1309900
Titin	Ttn	A2ASS6	gi|755499202|ref|XP_011237740.1|	gi|755499202|ref|XP_011237740.1|	gi|755499202|ref|XP_011237740.1|;gi|1039759925|ref|XP_017172628.1|;gi|77812699|ref|NP_082280.2|;gi|77812697|ref|NP_035782.3|	TEAYAVSSFKR	TEAY(0.999)AVS(0.001)SFKR	Y	4	33376;34319;25956;32537	34283	NaN	NaN	NaN	-0.571069	NaN	NaN	NaN	NaN	0.998712	0.00135668	79.23	63.601	79.23	-1.5234	937170
Titin	Ttn	A2ASS6	gi|755499202|ref|XP_011237740.1|	gi|755499202|ref|XP_011237740.1|	gi|755499202|ref|XP_011237740.1|;gi|1039759925|ref|XP_017172628.1|;gi|77812699|ref|NP_082280.2|;gi|77812697|ref|NP_035782.3|	TFVYLK	TFVY(1)LK	Y	4	19000;19943;11580;18161	19907	NaN	-1.67013	NaN	0.139215	0.562653	-0.813935	-1.24588	NaN	0.999956	0.0145488	58.551	28.481	58.551	0.51691	1097300
Titin	Ttn	A2ASS6	gi|755499202|ref|XP_011237740.1|	gi|755499202|ref|XP_011237740.1|	gi|755499202|ref|XP_011237740.1|;gi|1039759925|ref|XP_017172628.1|;gi|77812699|ref|NP_082280.2|;gi|77812697|ref|NP_035782.3|	YTVTDLQAGEEYKFR	Y(0.828)T(0.171)VT(0.001)DLQAGEEYKFR	Y	1	29195;30138;21775;28356	30102	NaN	NaN	NaN	-1.34639	-0.115721	NaN	NaN	NaN	0.828152	0.000192897	51.771	42.451	51.771	0.57565	1866400
Titin	Ttn	A2ASS6	gi|755499202|ref|XP_011237740.1|	gi|755499202|ref|XP_011237740.1|	gi|755499202|ref|XP_011237740.1|;gi|1039759925|ref|XP_017172628.1|;gi|77812699|ref|NP_082280.2|;gi|77812697|ref|NP_035782.3|	TSWKVDQLQEGCSYYFR	TSWKVDQLQEGCS(0.023)Y(0.104)Y(0.872)FR	Y	15	22904;23847;15484;22065	23811	-0.40254	0.240707	NaN	-1.33578	-0.00962436	0.459916	0.06865	NaN	0.872455	5.23e-05	88.385	74.4	83.37	-0.22188	77050000
Titin	Ttn	A2ASS6	gi|755499202|ref|XP_011237740.1|	gi|755499202|ref|XP_011237740.1|	gi|755499202|ref|XP_011237740.1|;gi|1039759925|ref|XP_017172628.1|;gi|77812699|ref|NP_082280.2|;gi|77812697|ref|NP_035782.3|	TYALNAAGVSK	T(0.047)Y(0.953)ALNAAGVSK	Y	2	29798;30741;22378;28959	30705	NaN	NaN	NaN	-0.735058	-1.46753	NaN	NaN	NaN	0.953163	0.000277643	84.892	57.411	84.892	0.13024	1770600
Titin	Ttn	A2ASS6	gi|755499202|ref|XP_011237740.1|	gi|755499202|ref|XP_011237740.1|	gi|755499202|ref|XP_011237740.1|;gi|1039759925|ref|XP_017172628.1|;gi|77812699|ref|NP_082280.2|;gi|77812697|ref|NP_035782.3|	VENLTEGAIYYFR	VENLTEGAIY(0.012)Y(0.988)FR	Y	11	25068;26011;17648;24229	25975	0.211233	-0.190347	-0.48717	-1.2651	-0.18124	-0.221342	-0.675912	0.364247	0.988491	7.98e-07	120.87	108.81	120.87	-0.37366	22753000
Titin	Ttn	A2ASS6	gi|755499202|ref|XP_011237740.1|	gi|755499202|ref|XP_011237740.1|	gi|755499202|ref|XP_011237740.1|;gi|1039759925|ref|XP_017172628.1|;gi|77812699|ref|NP_082280.2|;gi|77812697|ref|NP_035782.3|	VLEADPYFTVK	VLEADPY(0.996)FT(0.004)VK	Y	7	12546;13489;5126;11707	13453	NaN	0.308447	-0.0513818	NaN	-0.00962436	0.761114	-0.0817258	0.461207	0.996088	0.000104664	102.4	89	102.4	0.59378	15095000
Titin	Ttn	A2ASS6	gi|755499202|ref|XP_011237740.1|	gi|755499202|ref|XP_011237740.1|	gi|755499202|ref|XP_011237740.1|;gi|1039759925|ref|XP_017172628.1|;gi|77812699|ref|NP_082280.2|;gi|77812697|ref|NP_035782.3|	VNWYLNGQLIR	VNWY(1)LNGQLIR	Y	4	1881;1881;1835;1881	1881	-0.00643003	0.0163324	NaN	NaN	-0.748505	0.184774	-0.0767238	0.349345	1	0.000609987	65.278	51.469	65.278	0.91661	5191800
Titin	Ttn	A2ASS6	gi|755499202|ref|XP_011237740.1|	gi|755499202|ref|XP_011237740.1|	gi|755499202|ref|XP_011237740.1|;gi|1039759925|ref|XP_017172628.1|;gi|77812699|ref|NP_082280.2|;gi|77812697|ref|NP_035782.3|	VRYDGIHYLDIVDCK	VRYDGIHY(1)LDIVDCK	Y	8	1902;1902;1856;1902	1902	-0.184071	0.465059	-0.143706	-1.17797	-0.675558	0.236648	-0.0556864	NaN	0.999607	8.54e-05	78.191	65.699	78.191	-0.71561	4883600
Titin	Ttn	A2ASS6	gi|755499202|ref|XP_011237740.1|	gi|755499202|ref|XP_011237740.1|	gi|755499202|ref|XP_011237740.1|;gi|1039759925|ref|XP_017172628.1|;gi|77812699|ref|NP_082280.2|;gi|77812697|ref|NP_035782.3|	VSAENAAGVGEPSPATVYYK	VSAENAAGVGEPSPAT(0.055)VY(0.759)Y(0.185)K	Y	18	24792;25735;17372;23953	25699	NaN	NaN	NaN	-0.907835	-0.87562	NaN	NaN	NaN	0.759095	3.13e-05	64.249	53.451	64.249	0.17121	3575100
Titin	Ttn	A2ASS6	gi|755499202|ref|XP_011237740.1|	gi|755499202|ref|XP_011237740.1|	gi|755499202|ref|XP_011237740.1|;gi|1039759925|ref|XP_017172628.1|;gi|77812699|ref|NP_082280.2|;gi|77812697|ref|NP_035782.3|	VSELTEGVPYYFR	VSELTEGVPY(0.5)Y(0.5)FR	Y	10	29400;30343;21980;28561	30307	0.144196	NaN	0.572663	-0.118707	NaN	NaN	NaN	1.05974	0.5	3.38e-06	111.94	93.523	111.94	-1.2367	20000000
Titin	Ttn	A2ASS6	gi|755499202|ref|XP_011237740.1|	gi|755499202|ref|XP_011237740.1|	gi|755499202|ref|XP_011237740.1|;gi|1039759925|ref|XP_017172628.1|;gi|77812699|ref|NP_082280.2|;gi|77812697|ref|NP_035782.3|	VSELTEGVPYYFR	VSELTEGVPY(0.047)Y(0.953)FR	Y	11	29401;30344;21981;28562	30308	-0.12061	0.202377	0.307856	-0.383514	-0.00962436	0.401111	-0.0558301	0.794936	0.953361	2.24e-09	133.32	106.61	129.34	0.12562	44051000
Titin	Ttn	A2ASS6	gi|755499202|ref|XP_011237740.1|	gi|755499202|ref|XP_011237740.1|	gi|755499202|ref|XP_011237740.1|;gi|1039759925|ref|XP_017172628.1|;gi|77812699|ref|NP_082280.2|;gi|77812697|ref|NP_035782.3|	VTAENEYGIGLPAR	VTAENEY(1)GIGLPAR	Y	7	23995;24938;16575;23156	24902	0.05841	-0.248317	0.391338	0.253449	0.489204	0.750883	0.166005	-0.0732481	1	2.2e-08	125.53	107.86	125.53	0.95398	13388000
Titin	Ttn	A2ASS6	gi|755499202|ref|XP_011237740.1|	gi|755499202|ref|XP_011237740.1|	gi|755499202|ref|XP_011237740.1|;gi|1039759925|ref|XP_017172628.1|;gi|77812699|ref|NP_082280.2|;gi|77812697|ref|NP_035782.3|	VTGYYIERK	VTGY(0.014)Y(0.986)IERK	Y	5	31247;32190;23827;30408	32154	-1.1476	-0.120043	NaN	0.771108	NaN	0.691804	-0.0518158	NaN	0.985967	0.000260327	109.29	85.936	88.495	1.7501	10220000
Titin	Ttn	A2ASS6	gi|755499202|ref|XP_011237740.1|	gi|755499202|ref|XP_011237740.1|	gi|755499202|ref|XP_011237740.1|;gi|1039759925|ref|XP_017172628.1|;gi|77812699|ref|NP_082280.2|;gi|77812697|ref|NP_035782.3|	VVGKPDPECEWYKNGVK	VVGKPDPECEWY(1)KNGVK	Y	12	2118;2118;2072;2118	2118	NaN	NaN	-0.127463	1.24863	NaN	1.07605	NaN	0.647219	1	2.1e-05	118.21	110.63	118.21	-0.71397	8186900
Titin	Ttn	A2ASS6	gi|755499202|ref|XP_011237740.1|	gi|755499202|ref|XP_011237740.1|	gi|755499202|ref|XP_011237740.1|;gi|1039759925|ref|XP_017172628.1|;gi|77812699|ref|NP_082280.2|;gi|77812697|ref|NP_035782.3|	VVNDYGEDSSYAELFVK	VVNDY(0.998)GEDS(0.002)SYAELFVK	Y	5	32529;33472;25109;31690	33436	0.234612	0.482909	0.170088	NaN	NaN	NaN	-0.225778	-0.154218	0.997604	9.88e-19	102.08	89.592	102.08	0.96146	11673000
Titin	Ttn	A2ASS6	gi|755499202|ref|XP_011237740.1|	gi|755499202|ref|XP_011237740.1|	gi|755499202|ref|XP_011237740.1|;gi|1039759925|ref|XP_017172628.1|;gi|77812699|ref|NP_082280.2|;gi|77812697|ref|NP_035782.3|	VYDTPGPCPSVSVK	VY(1)DTPGPCPSVSVK	Y	2	30417;31360;22997;29578	31324	NaN	NaN	NaN	0.060752	0.333086	-1.12131	-0.92028	-1.35184	0.999992	1.74e-05	101.3	88.807	101.3	0.15515	10024000
Titin	Ttn	A2ASS6	gi|755499202|ref|XP_011237740.1|	gi|755499202|ref|XP_011237740.1|	gi|755499202|ref|XP_011237740.1|;gi|1039759925|ref|XP_017172628.1|;gi|77812699|ref|NP_082280.2|;gi|77812697|ref|NP_035782.3|	WEQFYVMPLPR	WEQFY(1)VMPLPR	Y	5	32917;33860;25497;32078	33824	0.300256	0.762975	0.604739	NaN	-0.389282	-0.777919	0.209453	0.356079	1	0.00265809	48.284	43.905	48.284	0.19851	3722300
Titin	Ttn	A2ASS6	gi|755499202|ref|XP_011237740.1|	gi|755499202|ref|XP_011237740.1|	gi|755499202|ref|XP_011237740.1|;gi|1039759925|ref|XP_017172628.1|;gi|77812699|ref|NP_082280.2|;gi|77812697|ref|NP_035782.3|	YDRPGRPDPPEVTK	Y(1)DRPGRPDPPEVTK	Y	1	19275;20218;11855;18436	20182	NaN	NaN	NaN	-1.44521	NaN	NaN	NaN	NaN	0.999979	0.000424803	51.643	32.4	51.643	-0.58851	1605200
Titin	Ttn	A2ASS6	gi|755499202|ref|XP_011237740.1|	gi|755499202|ref|XP_011237740.1|	gi|755499202|ref|XP_011237740.1|;gi|1039759925|ref|XP_017172628.1|;gi|77812699|ref|NP_082280.2|;gi|77812697|ref|NP_035782.3|	YGLGVPVESEPIVAR	Y(1)GLGVPVESEPIVAR	Y	1	30102;31045;22682;29263	31009	NaN	NaN	NaN	-0.871101	-0.977556	NaN	NaN	NaN	1	9.79e-05	73.386	67.671	73.386	0.58268	4373400
Titin	Ttn	A2ASS6	gi|755499202|ref|XP_011237740.1|	gi|755499202|ref|XP_011237740.1|	gi|755499202|ref|XP_011237740.1|;gi|1039759925|ref|XP_017172628.1|;gi|77812699|ref|NP_082280.2|;gi|77812697|ref|NP_035782.3|	YKEYCFR	Y(1)KEYCFR	Y	1	29690;30633;22270;28851	30597	NaN	NaN	NaN	-1.44521	NaN	NaN	NaN	NaN	1	0.000228898	114.78	87.529	114.78	-0.51758	1653100
Titin	Ttn	A2ASS6	gi|755499202|ref|XP_011237740.1|	gi|755499202|ref|XP_011237740.1|	gi|755499202|ref|XP_011237740.1|;gi|1039759925|ref|XP_017172628.1|;gi|77812699|ref|NP_082280.2|;gi|77812697|ref|NP_035782.3|	YKHSLIIK	Y(0.996)KHS(0.004)LIIK	Y	1	13668;14611;6248;12829	14575	NaN	NaN	NaN	NaN	-0.00962436	NaN	NaN	NaN	0.996356	0.00010328	107.57	36.073	107.57	0.21873	365200
Titin	Ttn	A2ASS6	gi|755499202|ref|XP_011237740.1|	gi|755499202|ref|XP_011237740.1|	gi|755499202|ref|XP_011237740.1|;gi|1039759925|ref|XP_017172628.1|;gi|77812699|ref|NP_082280.2|;gi|77812697|ref|NP_035782.3|	YSSPPAHVK	Y(0.923)S(0.256)S(0.82)PPAHVK	Y	1	33024;33967;25604;32185	33931	NaN	NaN	NaN	-1.44521	NaN	NaN	NaN	NaN	0.923467	0.000362806	83.54	76.175	73.499	0.4041	6015600
Titin	Ttn	A2ASS6	gi|755499202|ref|XP_011237740.1|	gi|755499202|ref|XP_011237740.1|	gi|755499202|ref|XP_011237740.1|;gi|1039759925|ref|XP_017172628.1|;gi|77812699|ref|NP_082280.2|;gi|77812697|ref|NP_035782.3|	YSTYHVPTKEETSTSYAELR	Y(0.762)S(0.182)T(0.045)Y(0.01)HVPTKEETSTSYAELR	Y	1	33042;33985;25622;32203	33949	NaN	NaN	NaN	-1.56625	0.102036	NaN	NaN	NaN	0.761963	3.28e-05	68.952	66.239	68.952	0.20913	1949900
Titin	Ttn	A2ASS6	gi|755499202|ref|XP_011237740.1|	gi|755499202|ref|XP_011237740.1|	gi|755499202|ref|XP_011237740.1|;gi|1039759925|ref|XP_017172628.1|;gi|77812699|ref|NP_082280.2|;gi|77812697|ref|NP_035782.3|	YSTYHVPTKEETSTSYAELR	YSTYHVPTKEET(0.009)S(0.026)T(0.079)S(0.246)Y(0.64)AELR	Y	16	33057;34000;25637;32218	33964	-0.49153	NaN	0.0705018	0.903573	0.811415	-0.000155481	1.32463	NaN	0.639797	3.32e-05	68.411	64.416	68.411	0.34488	7969400
Titin	Ttn	A2ASS6	gi|755499202|ref|XP_011237740.1|	gi|755499202|ref|XP_011237740.1|	gi|755499202|ref|XP_011237740.1|;gi|1039759925|ref|XP_017172628.1|;gi|77812699|ref|NP_082280.2|;gi|77812697|ref|NP_035782.3|	YYGAVGSTLR	Y(0.5)Y(0.5)GAVGSTLR	Y	1	31520;32463;24100;30681	32427	NaN	NaN	NaN	1.32116	NaN	NaN	1.10117	NaN	0.5	4.14e-07	142	117.22	142	0.12358	9021100
Titin	Ttn	A2ASS6	gi|755499202|ref|XP_011237740.1|	gi|755499202|ref|XP_011237740.1|	gi|755499202|ref|XP_011237740.1|;gi|1039759925|ref|XP_017172628.1|;gi|77812699|ref|NP_082280.2|;gi|77812697|ref|NP_035782.3|	YYGAVGSTLR	Y(0.07)Y(0.93)GAVGSTLR	Y	2	31521;32464;24101;30682	32428	-1.2529	-0.120043	-0.0417929	0.459542	1.08553	-0.0286484	0.239548	0.629282	0.930451	4.14e-07	142	117.22	140.17	0.21015	17329000
Protein unc-45 homolog B	Unc45b	Q8CGY6	gi|264681528|ref|NP_848795.3|	gi|264681528|ref|NP_848795.3|	gi|264681528|ref|NP_848795.3|	ICEEYITSK	ICEEY(0.988)IT(0.009)S(0.002)K	Y	5	382	382	NaN	NaN	NaN	NaN	NaN	NaN	1.00046	-0.0152252	0.988493	0.0125167	42.336	31.172	42.336	-0.42501	399540
Protein unc-45 homolog B	Unc45b	Q8CGY6	gi|264681528|ref|NP_848795.3|	gi|264681528|ref|NP_848795.3|	gi|264681528|ref|NP_848795.3|	VYEVVRPLVSLLDTQR	VY(1)EVVRPLVSLLDTQR	Y	2	715	717	NaN	NaN	NaN	0.0959874	0.790579	NaN	-0.905821	-0.856106	1	2.41e-27	161.19	142.61	124.25	1.0867	19451000
Cytochrome b-c1 complex subunit 2, mitochondrial	Uqcrc2	Q9DB77	gi|22267442|ref|NP_080175.1|	gi|22267442|ref|NP_080175.1|	gi|22267442|ref|NP_080175.1|	ITSEELHYFVQNHFTSAR	ITS(0.012)EELHY(0.987)FVQNHFTSAR	Y	8	207	207	0.255157	0.0403538	-1.04233	-1.18906	NaN	-0.127252	-1.49616	-0.870066	0.987122	2.25e-05	56.817	48.533	56.817	0.057252	6291800
Cytochrome b-c1 complex subunit Rieske, mitochondrial	Uqcrfs1	Q9CR68	gi|13385168|ref|NP_079986.1|	gi|13385168|ref|NP_079986.1|	gi|13385168|ref|NP_079986.1|	VPDFSDYR	VPDFS(0.024)DY(0.976)R	Y	7	91	91	0.144196	-0.0726883	-0.17915	0.913471	-0.27167	-0.0214013	0.244143	0.337156	0.975651	0.0171789	54.982	44.23	40.058	0.34693	5195100
Valine--tRNA ligase	Vars	Q9Z1Q9	gi|1039753239|ref|XP_017172885.1|	gi|1039753239|ref|XP_017172885.1|	gi|1039753239|ref|XP_017172885.1|;gi|255069795|ref|NP_035820.3|;gi|1039753237|ref|XP_017172884.1|	LHEEGVIYR	LHEEGVIY(1)R	Y	8	100;468;468	468	-0.0767975	0.0715521	-0.059314	NaN	NaN	0.105928	NaN	0.316523	1	0.0129605	41.876	19.639	41.876	-0.29487	390340
Vinculin	Vcl	Q64727	gi|31543942|ref|NP_033528.3|	gi|31543942|ref|NP_033528.3|	gi|31543942|ref|NP_033528.3|;gi|568987488|ref|XP_006518985.1|	ILLRNPGNQAAYEHFETMK	ILLRNPGNQAAY(1)EHFETMK	Y	12	692;692	692	0.043373	0.141433	-0.253206	-0.168736	0.0846107	NaN	-0.605629	NaN	0.999531	4.76e-05	92.264	85.49	92.264	-0.13704	6249100
Vinculin	Vcl	Q64727	gi|31543942|ref|NP_033528.3|	gi|31543942|ref|NP_033528.3|	gi|31543942|ref|NP_033528.3|;gi|568987488|ref|XP_006518985.1|	SFLDSGYR	SFLDSGY(1)R	Y	7	822;822	822	-0.0753367	-0.0888037	-0.0975189	-0.177303	-0.00962436	0.23921	0.25746	-0.773736	0.999981	1.16e-47	190.44	158.76	163.99	-0.23366	42660000
Voltage-dependent anion-selective channel protein 1	Vdac1	Q60932	gi|6755963|ref|NP_035824.1|	gi|6755963|ref|NP_035824.1|	gi|6755963|ref|NP_035824.1|;gi|1039736956|ref|XP_017169989.1|	YQVDPDACFSAK	Y(1)QVDPDACFSAK	Y	1	225;307	238	NaN	NaN	NaN	-1.04842	-0.55878	NaN	NaN	NaN	1	1.35e-05	105.65	83.656	105.65	-0.24496	3481900
Voltage-dependent anion-selective channel protein 3	Vdac3	Q5EBQ0	gi|312222784|ref|NP_001185927.1|	gi|312222784|ref|NP_001185927.1|	gi|312222784|ref|NP_001185927.1|	SCSGVMEFSTSGHAYTDTGK	SCSGVMEFS(0.005)T(0.083)S(0.083)GHAY(0.607)T(0.205)DT(0.017)GK	Y	15	49	49	0.144196	-0.71118	-0.416922	-0.81475	-0.00959415	-0.0944373	0.383936	0.0843392	0.607368	4e-05	69.747	65.885	69.747	0.14381	5523000
Vimentin	Vim	P20152	gi|31982755|ref|NP_035831.2|	gi|31982755|ref|NP_035831.2|	gi|31982755|ref|NP_035831.2|	SLYSSSPGGAYVTR	S(0.002)LY(0.99)S(0.008)SSPGGAYVTR	Y	3	53	53	-0.565573	NaN	0.393406	NaN	0.564894	NaN	1.09154	0.228623	0.989742	0.000123056	63.185	47.641	63.185	-0.0095532	1578800
Neural Wiskott-Aldrich syndrome protein	Wasl	Q91YD9	gi|268370040|ref|NP_082735.2|	gi|268370040|ref|NP_082735.2|	gi|268370040|ref|NP_082735.2|	VIYDFIEK	VIY(1)DFIEK	Y	3	253	253	-0.182499	0.0298055	-0.402766	-0.176898	-0.00962436	-0.374851	0.458149	-0.029941	1	4.37e-05	118.5	76.843	53.775	-0.10896	21798000
14-3-3 protein epsilon	Ywhae	P62259	gi|226874906|ref|NP_033562.3|	gi|226874906|ref|NP_033562.3|	gi|226874906|ref|NP_033562.3|	YLAEFATGNDRK	Y(1)LAEFATGNDRK	Y	1	131	131	NaN	NaN	NaN	-0.729991	-1.49053	NaN	NaN	NaN	1	3.51e-31	189.52	176.56	189.52	0.028152	7071200
14-3-3 protein gamma	Ywhag	P61982	gi|31543976|ref|NP_061359.2|	gi|31543976|ref|NP_061359.2|	gi|31543976|ref|NP_061359.2|	NCSETQYESKVFYLK	NCS(0.002)ET(0.044)QY(0.892)ES(0.061)KVFY(0.001)LK	Y	7	117	117	-0.565467	NaN	0.463931	-0.1027	0.334107	0.797639	NaN	NaN	0.89167	0.000163015	53.3	48.005	53.3	-0.20768	3535100
14-3-3 protein gamma	Ywhag	P61982	gi|31543976|ref|NP_061359.2|	gi|31543976|ref|NP_061359.2|	gi|31543976|ref|NP_061359.2|	YLAEVATGEKR	Y(1)LAEVATGEKR	Y	1	133	133	NaN	NaN	NaN	-1.44521	NaN	NaN	NaN	NaN	1	6.5e-13	157.14	104.56	157.14	0.42873	2103600
14-3-3 protein zeta/delta	Ywhaz	P63101	gi|359385700|ref|NP_001240736.1|	gi|359385700|ref|NP_001240736.1|	gi|359385700|ref|NP_001240736.1|;gi|755550334|ref|XP_011243654.1|;gi|6756041|ref|NP_035870.1|;gi|359385698|ref|NP_001240735.1|;gi|359385696|ref|NP_001240734.1|	YLAEVAAGDDKK	Y(1)LAEVAAGDDKK	Y	1	107;128;128;128;128	128	NaN	NaN	NaN	-1.44521	NaN	NaN	NaN	NaN	1	5.27e-05	107.09	76.476	107.09	0.35856	868300
Actin, alpha cardiac muscle 1	Actc1	P68033	gi|14192922|ref|NP_033738.1|;gi|439253893|ref|NP_001258970.1|;gi|6671507|ref|NP_031418.1|	gi|14192922|ref|NP_033738.1|	gi|14192922|ref|NP_033738.1|;gi|439253893|ref|NP_001258970.1|;gi|33563240|ref|NP_033736.1|;gi|6671507|ref|NP_031418.1|;gi|157823889|ref|NP_033740.2|;gi|569006251|ref|XP_006526669.1|	ILTERGYSFVTTAER	ILT(0.353)ERGY(0.294)S(0.353)FVTTAER	S	8	201;201;201;201;200;201	201	NaN	NaN	NaN	NaN	NaN	NaN	NaN	NaN	0.352858	0.00479708	58.079	45.287	58.079	0.57838	0
Actin, alpha cardiac muscle 1	Actc1	P68033	gi|14192922|ref|NP_033738.1|;gi|30425250|ref|NP_780706.1|;gi|439253893|ref|NP_001258970.1|;gi|6671507|ref|NP_031418.1|;gi|6752954|ref|NP_033739.1|	gi|14192922|ref|NP_033738.1|	gi|14192922|ref|NP_033738.1|;gi|30425250|ref|NP_780706.1|;gi|439253893|ref|NP_001258970.1|;gi|33563240|ref|NP_033736.1|;gi|6671507|ref|NP_031418.1|;gi|157823889|ref|NP_033740.2|;gi|569006251|ref|XP_006526669.1|;gi|6752954|ref|NP_033739.1|;gi|6671509|ref|NP_031419.1|;gi|927028891|ref|NP_001300852.1|	SYELPDGQVITIGNER	S(0.562)Y(0.438)ELPDGQVITIGNER	S	1	241;240;241;241;241;240;241;239;239;117	241	NaN	NaN	-0.762724	-0.800296	NaN	NaN	-1.12743	-0.454636	0.561645	1.96e-09	90.561	86.463	90.561	0.12159	12947000
Actin, alpha cardiac muscle 1	Actc1	P68033	gi|14192922|ref|NP_033738.1|;gi|439253893|ref|NP_001258970.1|;gi|6671507|ref|NP_031418.1|	gi|14192922|ref|NP_033738.1|	gi|14192922|ref|NP_033738.1|;gi|439253893|ref|NP_001258970.1|;gi|33563240|ref|NP_033736.1|;gi|6671507|ref|NP_031418.1|;gi|157823889|ref|NP_033740.2|;gi|569006251|ref|XP_006526669.1|	ILTERGYSFVTTAER	ILT(0.353)ERGY(0.294)S(0.353)FVTTAER	T	3	196;196;196;196;195;196	196	NaN	NaN	NaN	NaN	NaN	NaN	NaN	NaN	0.352858	0.00479708	58.079	45.287	58.079	0.57838	0
Uncharacterized protein	Adgrf2	Q3UQ38	gi|1039753913|ref|XP_017173054.1|	gi|1039753913|ref|XP_017173054.1|	gi|1039753913|ref|XP_017173054.1|	ITSAKWISR	IT(0.002)S(0.998)AKWIS(1)R	S	3	649	NA	0.0954341	NaN	0.753008	NaN	NaN	-0.393967	0.552963	1.44743	0.998459	0.0130688	40.352	18.359	40.352	-0.012576	3569200
Uncharacterized protein	Adgrf2	Q3UQ38	gi|1039753913|ref|XP_017173054.1|	gi|1039753913|ref|XP_017173054.1|	gi|1039753913|ref|XP_017173054.1|	ITSAKWISR	IT(0.002)S(0.998)AKWIS(1)R	S	8	654	NA	0.0954341	NaN	0.753008	NaN	NaN	-0.393967	0.552963	1.44743	0.999773	0.0130688	40.352	18.359	40.352	-0.012576	3569200
Actin filament-associated protein 1-like 2	Afap1l2	Q5DTU0	gi|22122607|ref|NP_666214.1|	gi|22122607|ref|NP_666214.1|	gi|22122607|ref|NP_666214.1|;gi|1039757686|ref|XP_017173660.1|;gi|295317359|ref|NP_001171268.1|;gi|295317357|ref|NP_001171267.1|;gi|1039757684|ref|XP_017173659.1|;gi|569007121|ref|XP_006527087.1|;gi|1039757682|ref|XP_017173658.1|;gi|1039757680|ref|XP_017173657.1|	VAQQPLSLVGCDVLPDPSPDHLYSFR	VAQQPLSLVGCDVLPDPS(0.003)PDHLY(0.407)S(0.59)FR	S	24	358;386;414;432;432;460;442;460	414	NaN	NaN	0.628383	-1.49321	NaN	-0.525198	NaN	NaN	0.590058	1.58e-08	55.158	54.581	46.818	-0.52017	79463000
Alpha-2-HS-glycoprotein	Ahsg	P29699	gi|451172066|ref|NP_001263379.1|	gi|451172066|ref|NP_001263379.1|	gi|451172066|ref|NP_001263379.1|;gi|7304875|ref|NP_038493.1|	VMHTQCHSTPDSAEDVR	VMHT(0.001)QCHS(0.009)T(0.036)PDS(0.955)AEDVR	S	12	131;138	138	NaN	NaN	NaN	-0.747749	NaN	NaN	NaN	NaN	0.954684	0.00586531	45.347	40.292	45.347	-0.41739	735470
Annexin A2	Anxa2	P07356	gi|6996913|ref|NP_031611.1|	gi|6996913|ref|NP_031611.1|	gi|6996913|ref|NP_031611.1|;gi|568960713|ref|XP_006510859.1|	LSLEGDHSTPPSAYGSVKPYTNFDAERDALNIETAVK	LSLEGDHS(0.002)T(0.005)PPS(0.45)AY(0.407)GS(0.125)VKPY(0.005)T(0.006)NFDAERDALNIETAVK	S	12	22;22	22	NaN	NaN	NaN	NaN	NaN	NaN	NaN	NaN	0.449666	2.22e-13	53.553	42.907	53.553	-0.45926	0
Annexin A2	Anxa2	P07356	gi|6996913|ref|NP_031611.1|	gi|6996913|ref|NP_031611.1|	gi|6996913|ref|NP_031611.1|;gi|568960713|ref|XP_006510859.1|	LSLEGDHSTPPSAYGSVKPYTNFDAER	LSLEGDHST(0.002)PPS(0.108)AY(0.411)GS(0.48)VKPYTNFDAER	S	16	26;26	26	NaN	NaN	NaN	NaN	NaN	NaN	NaN	NaN	0.479521	7.19e-11	79.426	71.553	79.426	-0.014664	0
Rho GTPase-activating protein 27	Arhgap27	A2AB59	gi|327412300|ref|NP_001192165.1|	gi|327412300|ref|NP_001192165.1|	gi|327412300|ref|NP_001192165.1|	AESPKQVDDPPEPVYANVER	AES(1)PKQVDDPPEPVY(1)ANVER	S	3	215	215	0.258277	-0.258784	0.0220642	NaN	NaN	0.153431	1.06488	0.381706	1	0.000388891	70.449	64.333	70.449	-0.45673	8726400
Rho GTPase-activating protein 42	Arhgap42	B2RQE8	gi|198278482|ref|NP_082099.1|	gi|198278482|ref|NP_082099.1|	gi|198278482|ref|NP_082099.1|;gi|568958574|ref|XP_006509947.1|	LDTASSNGYQRPGSVVAAK	LDTAS(0.006)S(0.026)NGY(0.445)QRPGS(0.522)VVAAK	S	14	764;798	764	NaN	-0.120043	NaN	NaN	NaN	NaN	NaN	NaN	0.522092	9e-05	52.862	44.737	52.862	0.25683	546690
Sodium/potassium-transporting ATPase subunit alpha-1	Atp1a1	Q8VDN2	gi|21450277|ref|NP_659149.1|	gi|21450277|ref|NP_659149.1|	gi|21450277|ref|NP_659149.1|	ACVVHGSDLKDMTSEELDDILRYHTEIVFAR	ACVVHGSDLKDMTSEELDDILRY(0.104)HT(0.896)EIVFAR	T	25	686	686	-0.697117	NaN	NaN	0.292839	NaN	0.651766	NaN	NaN	0.895842	7.47e-16	93.876	91.975	93.876	-0.42762	24481000
Calsequestrin-2	Casq2	O09161	gi|157951700|ref|NP_033944.2|	gi|157951700|ref|NP_033944.2|	gi|157951700|ref|NP_033944.2|;gi|568921685|ref|XP_006501010.1|	NEDSEYYKAFQEAAEHFQPYIK	NEDS(0.53)EY(0.375)Y(0.095)KAFQEAAEHFQPYIK	S	4	176;190	176	NaN	NaN	NaN	NaN	NaN	NaN	NaN	-0.154218	0.529951	3.04e-07	44.238	41.883	42.123	-0.5376	2054300
Caveolin-1	Cav1	P49817	gi|6680854|ref|NP_031642.1|	gi|6680854|ref|NP_031642.1|	gi|6680854|ref|NP_031642.1|;gi|568939395|ref|XP_006505037.1|	YVDSEGHLYTVPIR	YVDSEGHLY(0.073)T(0.927)VPIR	T	10	15;15	15	NaN	NaN	NaN	NaN	NaN	-0.259901	NaN	-0.731256	0.926674	2.89e-07	71.176	65.635	71.176	0.68774	1249100
Cyclin-dependent kinase 1	Cdk1	P11440	gi|31542366|ref|NP_031685.2|	gi|31542366|ref|NP_031685.2|	gi|31542366|ref|NP_031685.2|;gi|7949020|ref|NP_058036.1|;gi|34556205|ref|NP_904326.1|	IGEGTYGVVYK	IGEGT(1)Y(0.999)GVVY(0.001)K	T	5	14;14;14	14	NaN	0.762288	0.83417	NaN	NaN	-0.67096	0.76106	NaN	0.999868	0.00282493	48.527	19.715	43.761	-0.18756	7708900
Creatine kinase S-type, mitochondrial	Ckmt2	Q6P8J7	gi|38259206|ref|NP_940807.1|	gi|38259206|ref|NP_940807.1|	gi|38259206|ref|NP_940807.1|	GIWHNYDKTFLIWINEEDHTR	GIWHNY(0.032)DKT(0.968)FLIWINEEDHTR	T	9	258	258	NaN	NaN	NaN	NaN	-0.775836	NaN	-0.878168	NaN	0.96819	1.53e-05	84.581	80.87	84.581	0.20194	2985700
Carnitine O-palmitoyltransferase 1, muscle isoform	Cpt1b	Q924X2	gi|162287165|ref|NP_034078.2|	gi|162287165|ref|NP_034078.2|	gi|162287165|ref|NP_034078.2|	LPWDIPEQCREAIENSYQVAK	LPWDIPEQCREAIENS(0.531)Y(0.469)QVAK	S	16	533	533	NaN	0.654435	NaN	NaN	NaN	NaN	NaN	0.528681	0.530816	0.000214979	40.968	30.619	40.968	-0.13623	5475200
NADH-cytochrome b5 reductase 3	Cyb5r3	Q9DCN2	gi|568991032|ref|XP_006520346.1|	gi|568991032|ref|XP_006520346.1|	gi|568991032|ref|XP_006520346.1|;gi|19745150|ref|NP_084063.1|;gi|755550818|ref|XP_006520345.2|	FALPSPQHILGLPIGQHIYLSTR	FALPSPQHILGLPIGQHIY(0.307)LS(0.347)T(0.347)R	S	21	59;82;101	82	NaN	NaN	NaN	NaN	NaN	NaN	NaN	NaN	0.346676	0.00110776	41.256	40.497	41.256	0.09334	0
NADH-cytochrome b5 reductase 3	Cyb5r3	Q9DCN2	gi|568991032|ref|XP_006520346.1|	gi|568991032|ref|XP_006520346.1|	gi|568991032|ref|XP_006520346.1|;gi|19745150|ref|NP_084063.1|;gi|755550818|ref|XP_006520345.2|	FALPSPQHILGLPIGQHIYLSTR	FALPSPQHILGLPIGQHIY(0.262)LS(0.308)T(0.429)R	T	22	60;83;102	83	NaN	NaN	NaN	NaN	NaN	NaN	NaN	NaN	0.429282	4.01e-07	80.412	73.663	80.412	-3.6021	0
Ddx26b protein	Ddx26b	Q8CCX8	gi|27370148|ref|NP_766367.1|	gi|27370148|ref|NP_766367.1|	gi|27370148|ref|NP_766367.1|;gi|569010024|ref|XP_006528040.1|;gi|569010022|ref|XP_006528039.1|	LTELNPK	LT(1)ELNPK	T	2	485;522;522	NA	NaN	NaN	NaN	NaN	NaN	NaN	NaN	NaN	1	0.0233869	46.351	20.242	46.351	0.61374	446470
Desmin	Des	P31001	gi|33563250|ref|NP_034173.1|	gi|33563250|ref|NP_034173.1|	gi|33563250|ref|NP_034173.1|	TFGGAPGFSLGSPLSSPVFPR	TFGGAPGFS(0.03)LGS(0.852)PLS(0.088)S(0.03)PVFPR	S	12	28	28	0.799373	0.921847	0.916056	NaN	NaN	-1.03859	-0.323297	-0.221807	0.851953	0.00594823	53.998	49.877	47.806	-0.17381	36454000
Desmocollin-2 (Fragment)	Dsc2	F6RM34	gi|958157205|ref|NP_001304292.1|	gi|958157205|ref|NP_001304292.1|	gi|958157205|ref|NP_001304292.1|;gi|7305007|ref|NP_038533.1|;gi|958157207|ref|NP_001304294.1|	HTYSEWYNFIQPR	HT(0.09)Y(0.408)S(0.499)EWY(0.003)NFIQPR	S	4	682;825;825	225	NaN	NaN	NaN	NaN	NaN	NaN	NaN	NaN	0.499096	0.0268651	49.448	46.587	49.448	0.2394	0
Dual specificity tyrosine-phosphorylation-regulated kinase 1B	Dyrk1b	Q9Z188	gi|6753698|ref|NP_034222.1|	gi|6753698|ref|NP_034222.1|	gi|6753698|ref|NP_034222.1|;gi|83816922|ref|NP_001033046.1|;gi|568944834|ref|XP_006539590.1|;gi|568944832|ref|XP_006539589.1|;gi|406035327|ref|NP_001258299.1|;gi|755554822|ref|XP_011244401.1|;gi|755554820|ref|XP_011244400.1|;gi|755554816|ref|XP_011244398.1|;gi|755554814|ref|XP_011244397.1|;gi|755554812|ref|XP_011244396.1|;gi|24418935|ref|NP_031916.1|;gi|164607150|ref|NP_001106860.1|	IYQYIQSR	IYQY(1)IQS(1)R	S	7	276;276;336;336;336;286;295;315;324;324;324;324	276	-0.734603	-0.0365796	-0.258153	-1.44521	-1.00261	-0.342693	-0.0226024	0.521061	1	0.0016227	82.261	57.331	82.261	0.088537	5134700
Dual specificity tyrosine-phosphorylation-regulated kinase 4	Dyrk4	Q8BI55	gi|755515738|ref|XP_011239409.1|	gi|755515738|ref|XP_011239409.1|	gi|755515738|ref|XP_011239409.1|;gi|755535031|ref|XP_011241854.1|;gi|67846105|ref|NP_001014412.1|;gi|568940075|ref|XP_006505319.1|;gi|295444860|ref|NP_997093.2|;gi|568940073|ref|XP_006505318.1|;gi|568968396|ref|XP_006514109.1|;gi|568940069|ref|XP_006505316.1|;gi|755515733|ref|XP_011239407.1|;gi|755515731|ref|XP_011239406.1|	VYTYIQSR	VYT(0.737)Y(0.263)IQSR	T	3	431;306;379;352;378;388;445;412;421;431	378	NaN	NaN	NaN	NaN	-0.00962436	NaN	NaN	NaN	0.737027	0.000577732	101.43	65.986	101.43	-0.014498	1956400
Elongation factor 1-alpha 1	Eef1a1	P10126	gi|126032329|ref|NP_034236.2|;gi|6681273|ref|NP_031932.1|	gi|6681273|ref|NP_031932.1|	gi|126032329|ref|NP_034236.2|;gi|6681273|ref|NP_031932.1|	EHALLAYTLGVK	EHALLAY(0.496)T(0.504)LGVK	T	8	142;142	142	NaN	NaN	NaN	NaN	NaN	NaN	-1.37595	NaN	0.503608	6.61e-10	132.56	108.1	132.56	0.071757	41993000
EH domain-containing protein 2	Ehd2	Q8BH64	gi|755519645|ref|XP_011248884.1|	gi|755519645|ref|XP_011248884.1|	gi|755519645|ref|XP_011248884.1|;gi|55742711|ref|NP_694708.2|	GPDEAIEDGEEGSEDDAEWVVTKDK	GPDEAIEDGEEGS(1)EDDAEWVVTKDK	S	13	438;438	438	-0.631032	NaN	1.29452	NaN	NaN	0.3517	0.477345	NaN	0.999752	3.36e-07	63.979	61.766	63.979	0.11138	19616000
Ephrin type-A receptor 2	Epha2	Q03145	gi|568930544|ref|XP_006538591.1|	gi|568930544|ref|XP_006538591.1|	gi|568930544|ref|XP_006538591.1|;gi|32484983|ref|NP_034269.2|	VLEDDPEATYTTSGGKIPIR	VLEDDPEAT(0.11)Y(0.349)T(0.4)T(0.11)S(0.031)GGKIPIR	T	11	500;774	774	NaN	NaN	NaN	NaN	NaN	NaN	NaN	NaN	0.400095	0.00242481	47.68	40.73	47.68	-0.011946	0
Ephrin type-A receptor 4	Epha4	Q03137	gi|568907510|ref|XP_006496471.1|	gi|568907510|ref|XP_006496471.1|	gi|568907510|ref|XP_006496471.1|;gi|568907508|ref|XP_006496470.1|;gi|34328113|ref|NP_031962.2|	TYVDPFTYEDPNQAVR	T(0.497)Y(0.503)VDPFT(0.131)Y(0.869)EDPNQAVR	T	1	544;595;595	595	NaN	NaN	NaN	NaN	NaN	NaN	NaN	NaN	0.497353	0.000115995	63.682	54.885	63.682	-1.7426	0
Ephrin type-A receptor 4	Epha4	Q03137	gi|568907510|ref|XP_006496471.1|	gi|568907510|ref|XP_006496471.1|	gi|568907510|ref|XP_006496471.1|;gi|568907508|ref|XP_006496470.1|;gi|34328113|ref|NP_031962.2|;gi|568935291|ref|XP_006534838.1|;gi|1039770460|ref|XP_017176146.1|;gi|111154065|ref|NP_031963.2|;gi|568935287|ref|XP_006534836.1|;gi|31982448|ref|NP_034270.1|;gi|568935283|ref|XP_006534834.1|;gi|568935281|ref|XP_006534833.1|;gi|568935279|ref|XP_006534832.1|	VLEDDPEAAYTTR	VLEDDPEAAY(0.032)T(0.316)T(0.652)R	T	12	730;781;781;652;704;674;726;782;816;828;838	781	NaN	NaN	NaN	-0.844233	-1.05877	NaN	NaN	NaN	0.651954	1.49e-12	140.93	115.59	140.93	0.0087985	16571000
Receptor protein-tyrosine kinase	Erbb2	Q80Y89	gi|54873610|ref|NP_001003817.1|	gi|54873610|ref|NP_001003817.1|	gi|54873610|ref|NP_001003817.1|	LLDIDETEYHADGGKVPIK	LLDIDET(0.544)EY(0.456)HADGGKVPIK	T	7	876	NA	NaN	1.3233	0.916056	NaN	-1.52221	NaN	NaN	NaN	0.543834	8.36e-08	54.768	44.153	54.768	0.35626	4107600
Aspartate aminotransferase, cytoplasmic	Got1	P05201	gi|160298209|ref|NP_034454.2|	gi|160298209|ref|NP_034454.2|	gi|160298209|ref|NP_034454.2|	IANDNSLNHEYLPILGLAEFR	IANDNS(0.537)LNHEY(0.463)LPILGLAEFR	S	6	66	66	NaN	-0.120043	NaN	NaN	NaN	NaN	NaN	NaN	0.536569	0.000283358	59.975	57.546	59.975	-0.47095	3806200
General receptor for phosphoinositides 1-associated scaffold protein	Grasp	Q9JJA9	gi|568992916|ref|XP_006521259.1|	gi|568992916|ref|XP_006521259.1|	gi|568992916|ref|XP_006521259.1|;gi|103472019|ref|NP_062391.3|	LVHGLVVKDPSIYDTLESVR	LVHGLVVKDPS(0.503)IY(0.446)DT(0.046)LES(0.005)VR	S	11	148;234	234	NaN	NaN	NaN	NaN	NaN	-0.67096	NaN	NaN	0.50313	0.000317703	40.432	36.334	40.432	-0.71518	753620
Glycogen synthase kinase-3 beta	Gsk3b	Q9WV60	gi|568995944|ref|XP_006522489.1|	gi|568995944|ref|XP_006522489.1|	gi|568995944|ref|XP_006522489.1|;gi|9790077|ref|NP_062801.1|;gi|568995942|ref|XP_006522488.1|;gi|568946346|ref|XP_006540322.1|;gi|568946344|ref|XP_006540321.1|;gi|72384361|ref|NP_001026837.1|	GEPNVSYICSR	GEPNVS(0.945)Y(0.055)ICSR	S	6	115;215;215;214;278;278	215	0.154486	NaN	0.528148	0.521873	0.667417	NaN	NaN	NaN	0.944943	4.72e-10	147.28	125.73	131.12	-0.29335	1427300000
Glycogen synthase kinase-3 beta	Gsk3b	Q9WV60	gi|568995944|ref|XP_006522489.1|	gi|568995944|ref|XP_006522489.1|	gi|568995944|ref|XP_006522489.1|;gi|9790077|ref|NP_062801.1|;gi|568995942|ref|XP_006522488.1|;gi|568946346|ref|XP_006540322.1|;gi|568946344|ref|XP_006540321.1|;gi|72384361|ref|NP_001026837.1|	GEPNVSYICSR	GEPNVS(0.051)Y(0.952)ICS(0.997)R	S	10	119;219;219;218;282;282	219	-0.401016	NaN	0.887432	-1.41715	NaN	0.451557	1.00909	NaN	0.996869	0.00125509	53.168	38.988	53.168	-0.20862	27826000
Hematopoietically-expressed homeobox protein Hhex	Hhex	P43120	gi|6680219|ref|NP_032271.1|	gi|6680219|ref|NP_032271.1|	gi|6680219|ref|NP_032271.1|	MLQLSERQVK	MLQLS(1)ERQVK	S	5	178	178	NaN	NaN	NaN	NaN	NaN	NaN	NaN	NaN	1	0.00309214	44.318	11.988	44.318	-4.3449	0
Hipk2 protein	Hipk2	Q5D0E9	gi|209862937|ref|NP_001129537.1|	gi|209862937|ref|NP_001129537.1|	gi|209862937|ref|NP_001129537.1|;gi|670357694|ref|NP_001288235.1|;gi|659066195|ref|NP_001281073.1|;gi|659066193|ref|NP_001281072.1|;gi|755503384|ref|XP_011238326.1|;gi|568940795|ref|XP_006505666.1|;gi|568940793|ref|XP_006505665.1|;gi|171543873|ref|NP_034563.2|;gi|669633295|ref|NP_001288233.1|;gi|158854012|ref|NP_034562.2|	AVCSTYLQSR	AVCS(0.002)T(0.569)Y(0.422)LQS(0.006)R	T	5	353;351;360;360;351;353;360;360;351;351	360	NaN	NaN	NaN	NaN	NaN	NaN	-0.816268	-1.08093	0.569343	0.0031183	73.499	66.1	73.499	0.079377	11377000
Homeodomain-interacting protein kinase 3	Hipk3	Q9ERH7	gi|224922826|ref|NP_001139296.1|	gi|224922826|ref|NP_001139296.1|	gi|224922826|ref|NP_001139296.1|;gi|224922824|ref|NP_034564.2|	TVCSTYLQSR	TVCS(0.005)T(0.413)Y(0.582)LQS(1)R	S	9	362;362	362	0.0166731	-4.91342	0.139295	-0.853157	-0.895652	-0.15958	1.19221	0.164005	0.999815	6.84e-07	133.16	106.06	133.16	-0.22364	21494000
Protein Hook homolog 2	Hook2	Q7TMK6	gi|269784735|ref|NP_001161463.1|	gi|269784735|ref|NP_001161463.1|	gi|269784735|ref|NP_001161463.1|;gi|269784731|ref|NP_573518.2|;gi|1039784796|ref|XP_006530804.2|;gi|1039784728|ref|XP_006530803.2|	TEDPTLLKR	TEDPT(1)LLKR	T	5	535;535;549;549	535	NaN	NaN	NaN	NaN	NaN	NaN	NaN	NaN	0.999973	0.00492186	48.794	32.217	48.794	-1.9542	0
Heat shock protein HSP 90-beta	Hsp90ab1	P11499	gi|40556608|ref|NP_032328.2|	gi|40556608|ref|NP_032328.2|	gi|40556608|ref|NP_032328.2|	IEDVGSDEEDDSGKDKK	IEDVGS(0.999)DEEDDS(0.001)GKDKK	S	6	255	255	NaN	-0.663752	0.0551954	3.54986	NaN	-1.003	-0.845379	-0.20481	0.998929	0.00193018	79.467	70.901	79.467	0.4915	4127400
10 kDa heat shock protein, mitochondrial	Hspe1	Q64433	gi|6680309|ref|NP_032329.1|	gi|6680309|ref|NP_032329.1|	gi|6680309|ref|NP_032329.1|	VLLPEYGGTK	VLLPEY(0.444)GGT(0.556)K	T	9	79	79	NaN	NaN	NaN	NaN	NaN	-0.67096	NaN	NaN	0.555714	0.027695	43.308	33.303	43.308	-0.050931	1462300
Serine/threonine-protein kinase ICK	Ick	Q9JKV2	gi|568961767|ref|XP_006511368.1|	gi|568961767|ref|XP_006511368.1|	gi|568961767|ref|XP_006511368.1|;gi|568961765|ref|XP_006511367.1|;gi|255522773|ref|NP_001157252.1|;gi|255522770|ref|NP_064371.2|	SRPPYTDYVSTR	S(0.002)RPPY(0.023)T(0.976)DY(0.989)VS(0.006)T(0.005)R	T	6	76;157;157;157	157	0.144196	0.98373	0.889208	NaN	NaN	NaN	0.822244	0.0853245	0.975657	0.00563391	48.899	37.523	48.899	0.05013	1296500
Isocitrate dehydrogenase [NADP], mitochondrial	Idh2	P54071	gi|225579033|ref|NP_766599.2|	gi|225579033|ref|NP_766599.2|	gi|225579033|ref|NP_766599.2|;gi|568947924|ref|XP_006540974.1|;gi|568947926|ref|XP_006540975.1|	DQTNDQVTIDSALATQKYSVAVK	DQTNDQVTIDS(0.009)ALAT(0.343)QKY(0.305)S(0.343)VAVK	S	19	108;108;108	108	NaN	NaN	NaN	NaN	NaN	NaN	NaN	NaN	0.343065	0.00113296	42.639	36.807	42.639	-0.13819	0
Isocitrate dehydrogenase [NADP], mitochondrial	Idh2	P54071	gi|225579033|ref|NP_766599.2|	gi|225579033|ref|NP_766599.2|	gi|225579033|ref|NP_766599.2|;gi|568947924|ref|XP_006540974.1|;gi|568947926|ref|XP_006540975.1|	DQTNDQVTIDSALATQKYSVAVK	DQTNDQVTIDS(0.009)ALAT(0.343)QKY(0.305)S(0.343)VAVK	T	15	104;104;104	104	NaN	NaN	NaN	NaN	NaN	NaN	NaN	NaN	0.343065	0.00113296	42.639	36.807	42.639	-0.13819	0
MICOS complex subunit Mic60	Immt	Q8CAQ8	gi|358439544|ref|NP_001240617.1|	gi|358439544|ref|NP_001240617.1|	gi|358439544|ref|NP_001240617.1|;gi|1039776046|ref|XP_017177317.1|;gi|1039776044|ref|XP_017177316.1|;gi|1039776040|ref|XP_017177314.1|;gi|1039776038|ref|XP_017177313.1|;gi|358439483|ref|NP_001240610.1|;gi|70608131|ref|NP_083949.2|;gi|358439536|ref|NP_001240616.1|;gi|1039776042|ref|XP_017177315.1|;gi|358439528|ref|NP_001240615.1|;gi|1039776036|ref|XP_017177312.1|	LLSYASYCIEHGDLELAAK	LLS(0.035)Y(0.101)AS(0.462)Y(0.402)CIEHGDLELAAK	S	6	616;650;651;662;682;683;694;646;657;678;689	694	NaN	NaN	NaN	NaN	NaN	NaN	NaN	NaN	0.462306	0.00645753	40.798	32.554	40.798	-0.19765	0
Tyrosine-protein kinase Lyn	Lyn	P25911	gi|755506082|ref|XP_011248241.1|	gi|755506082|ref|XP_011248241.1|	gi|755506082|ref|XP_011248241.1|;gi|161760634|ref|NP_034877.2|;gi|161760636|ref|NP_001104566.1|	VIEDNEYTAR	VIEDNEY(0.429)T(0.571)AR	T	8	309;377;398	398	-0.998865	NaN	NaN	NaN	NaN	-0.0412977	NaN	NaN	0.57075	0.00731919	57.785	48.827	57.785	0.19313	2772200
Mitogen-activated protein kinase 1	Mapk1	P63085	gi|84579909|ref|NP_001033752.1|	gi|84579909|ref|NP_001033752.1|	gi|84579909|ref|NP_001033752.1|;gi|6754632|ref|NP_036079.1|;gi|568995370|ref|XP_006522210.1|	VADPDHDHTGFLTEYVATR	VADPDHDHTGFLT(1)EY(0.999)VAT(0.001)R	T	13	183;183;183	183	NaN	NaN	NaN	-1.44521	NaN	NaN	NaN	NaN	0.999811	4.61e-06	118.51	106.51	118.51	-0.26375	9616000
Mitogen-activated protein kinase 10	Mapk10	Q61831	gi|893558721|ref|NP_001297615.1|	gi|893558721|ref|NP_001297615.1|	gi|893558721|ref|NP_001297615.1|;gi|882939001|ref|NP_001297381.1|;gi|7710060|ref|NP_057909.1|;gi|568987718|ref|XP_006519095.1|;gi|1039771581|ref|XP_017176380.1|;gi|1039771579|ref|XP_017176379.1|;gi|755512474|ref|XP_011247752.1|;gi|970116789|ref|NP_001305060.1|;gi|568935655|ref|XP_006535013.1|;gi|125858511|ref|NP_033184.2|;gi|893552094|ref|NP_001297612.1|;gi|1039771575|ref|XP_017176378.1|;gi|10397…	TAGTSFMMTPYVVTR	TAGT(0.006)S(0.006)FMMT(0.512)PY(0.433)VVT(0.043)R	T	9	183;183;183;183;183;183;147;221;221;221;183;183;183;183;183;221;221;221;221	221	NaN	NaN	NaN	NaN	NaN	NaN	-1.37595	NaN	0.511515	0.000102135	58.885	52.283	51.03	0.71688	4401800
Mitogen-activated protein kinase 14	Mapk14	P47811	gi|270341386|ref|NP_001161986.1|	gi|270341386|ref|NP_001161986.1|	gi|270341386|ref|NP_001161986.1|;gi|270341381|ref|NP_001161985.1|;gi|1039753601|ref|XP_017172969.1|;gi|270341370|ref|NP_001161980.1|;gi|10092590|ref|NP_036081.1|	HTDDEMTGYVATR	HTDDEMT(1)GY(1)VATR	T	7	103;103;103;180;180	180	-1.71413	0.635506	NaN	NaN	-1.05612	2.25575	2.24466	-0.154218	0.999954	3.77e-13	141.55	131.71	141.55	-0.021063	169110000
Mitogen-activated protein kinase 14	Mapk14	P47811	gi|270341386|ref|NP_001161986.1|	gi|270341386|ref|NP_001161986.1|	gi|270341386|ref|NP_001161986.1|;gi|270341381|ref|NP_001161985.1|;gi|1039753601|ref|XP_017172969.1|;gi|270341370|ref|NP_001161980.1|;gi|10092590|ref|NP_036081.1|	HTDDEMTGYVATR	HTDDEMT(0.116)GY(0.405)VAT(0.479)R	T	12	108;108;108;185;185	185	NaN	NaN	NaN	NaN	NaN	NaN	NaN	NaN	0.478938	0.0058714	43.761	36.396	43.761	0.53522	0
Mitogen-activated protein kinase 3	Mapk3	Q63844	gi|21489933|ref|NP_036082.1|	gi|21489933|ref|NP_036082.1|	gi|21489933|ref|NP_036082.1|	IADPEHDHTGFLTEYVATR	IADPEHDHTGFLT(0.999)EY(0.993)VAT(0.007)R	T	13	203	203	NaN	NaN	1.01199	-1.54798	-1.3949	-0.0961676	0.25947	NaN	0.999105	2.87e-05	97.5	84.829	96.708	-0.095877	83534000
Myosin-binding protein C, cardiac-type	Mybpc3	O70468	gi|568915712|ref|XP_006498945.1|	gi|568915712|ref|XP_006498945.1|	gi|568915712|ref|XP_006498945.1|;gi|755498872|ref|XP_011237643.1|;gi|134031947|ref|NP_032679.2|	RTSDSHEDAGTLDFSSLLK	RT(0.082)S(0.082)DS(0.835)HEDAGTLDFSSLLK	S	5	292;292;292	NA	0.0278438	1.06305	0.916056	4.03187	-1.44386	NaN	NaN	-0.456446	0.835275	0.000160879	101.86	95.201	100.81	-0.8376	17701000
Myosin-binding protein C, cardiac-type	Mybpc3	O70468	gi|568915712|ref|XP_006498945.1|	gi|568915712|ref|XP_006498945.1|	gi|568915712|ref|XP_006498945.1|;gi|755498872|ref|XP_011237643.1|;gi|134031947|ref|NP_032679.2|	VGQHLQLHDSYDR	VGQHLQLHDS(0.546)Y(0.454)DR	S	10	218;218;218	210	NaN	NaN	NaN	NaN	NaN	-0.67096	NaN	NaN	0.546434	0.0238373	50.897	42.853	50.897	0.027227	1405000
Myosin-7	Myh7	Q91Z83	gi|18859641|ref|NP_542766.1|	gi|18859641|ref|NP_542766.1|	gi|18859641|ref|NP_542766.1|;gi|1039745485|ref|XP_017171331.1|;gi|1039745483|ref|XP_017171330.1|	GQNVQQVSYAIGALAK	GQNVQQVS(0.544)Y(0.456)AIGALAK	S	8	421;421;421	421	-0.136851	0.91623	1.15118	NaN	NaN	NaN	-0.470079	-1.38234	0.543587	0.02161	56.514	45.399	56.514	0.57678	3255700
Myosin-7	Myh7	Q91Z83	gi|18859641|ref|NP_542766.1|;gi|6754774|ref|NP_034986.1|	gi|6754774|ref|NP_034986.1|	gi|18859641|ref|NP_542766.1|;gi|1039745485|ref|XP_017171331.1|;gi|1039745483|ref|XP_017171330.1|;gi|6754774|ref|NP_034986.1|;gi|255918225|ref|NP_001157643.1|;gi|568986973|ref|XP_006518741.1|;gi|568986971|ref|XP_006518740.1|	QKYEESQSELESSQKEAR	QKY(0.455)EES(0.538)QS(0.007)ELESSQKEAR	S	6	1463;1463;1463;1465;1465;1465;1465	1463	NaN	NaN	NaN	NaN	-0.00962436	NaN	NaN	NaN	0.53798	0.00027613	62.203	55.163	62.203	0.9618	9589500
Myozenin-2	Myoz2	Q9JJW5	gi|568923525|ref|XP_006501892.1|	gi|568923525|ref|XP_006501892.1|	gi|568923525|ref|XP_006501892.1|;gi|568923523|ref|XP_006501891.1|;gi|10946916|ref|NP_067478.1|	RSDKYTFENFQYESR	RS(0.012)DKY(0.267)T(0.444)FENFQY(0.267)ES(0.01)R	T	6	40;40;69	NA	NaN	NaN	NaN	NaN	NaN	NaN	NaN	NaN	0.443903	0.00471216	46.249	35.134	46.249	-0.22877	0
NADH dehydrogenase [ubiquinone] 1 beta subcomplex subunit 10	Ndufb10	Q9DCS9	gi|58037109|ref|NP_080960.1|	gi|58037109|ref|NP_080960.1|	gi|58037109|ref|NP_080960.1|	TPAPSPQTSLPNPITYLTK	TPAPSPQTS(0.001)LPNPIT(0.101)Y(0.341)LT(0.558)K	T	18	34	34	NaN	NaN	NaN	NaN	-0.00962436	NaN	NaN	NaN	0.557844	0.000143148	62.203	56.24	62.203	-0.42886	1068200
Neurofilament heavy polypeptide	Nefh	P19246	gi|124286811|ref|NP_035034.2|	gi|124286811|ref|NP_035034.2|	gi|124286811|ref|NP_035034.2|	SPIEVKSPEK	S(0.999)PIEVKS(0.001)PEK	S	1	763	763	NaN	NaN	NaN	-0.483753	-1.76158	NaN	NaN	NaN	0.999487	0.0108227	46.001	30.386	42.348	-0.54918	7261100
Pyruvate dehydrogenase E1 component subunit alpha, somatic form, mitochondrial	Pdha1	P35486	gi|6679261|ref|NP_032836.1|	gi|6679261|ref|NP_032836.1|	gi|6679261|ref|NP_032836.1|	YHGHSMSDPGVSYR	Y(0.015)HGHS(0.493)MS(0.493)DPGVS(0.544)Y(0.456)R	S	5	293	293	NaN	NaN	NaN	NaN	NaN	NaN	NaN	NaN	0.492598	0.00997612	45.28	39.565	45.28	0.97008	0
Pyruvate dehydrogenase E1 component subunit alpha, somatic form, mitochondrial	Pdha1	P35486	gi|6679261|ref|NP_032836.1|	gi|6679261|ref|NP_032836.1|	gi|6679261|ref|NP_032836.1|	YHGHSMSDPGVSYR	Y(0.015)HGHS(0.493)MS(0.493)DPGVS(0.544)Y(0.456)R	S	7	295	295	NaN	NaN	NaN	NaN	NaN	NaN	NaN	NaN	0.492598	0.00997612	45.28	39.565	45.28	0.97008	0
Pyruvate dehydrogenase E1 component subunit alpha, somatic form, mitochondrial	Pdha1	P35486	gi|6679261|ref|NP_032836.1|	gi|6679261|ref|NP_032836.1|	gi|6679261|ref|NP_032836.1|	YHGHSMSDPGVSYR	YHGHSMSDPGVS(0.557)Y(0.443)R	S	12	300	300	-0.206657	0.633448	0.916056	-1.61787	NaN	1.27672	0.236141	-2.32594	0.556852	0.00507819	60.157	52.792	58.098	-0.25891	5087700
Phosphoglycerate kinase 1	Pgk1	P09411	gi|70778976|ref|NP_032854.2|	gi|70778976|ref|NP_032854.2|	gi|70778976|ref|NP_032854.2|	SVVLMSHLGRPDGVPMPDKYSLEPVAAELK	SVVLMS(0.012)HLGRPDGVPMPDKY(0.466)S(0.522)LEPVAAELK	S	21	77	77	NaN	NaN	NaN	NaN	NaN	-1.17711	-1.00199	NaN	0.522107	2.51e-09	54.66	52.099	54.66	-0.35832	33529000
Prohibitin	Phb	P67778	gi|6679299|ref|NP_032857.1|	gi|6679299|ref|NP_032857.1|	gi|6679299|ref|NP_032857.1|;gi|85702063|ref|NP_001028937.1|	LEAAEDIAYQLSR	LEAAEDIAY(0.382)QLS(0.618)R	S	12	252;252	252	NaN	-0.155056	-0.49945	-1.16378	-0.58874	0.0112302	-0.123501	NaN	0.617975	0.0247205	43.03	21.97	43.03	1.4272	4221700
Plakophilin 2	Pkp2	Q9CQ73	gi|21312960|ref|NP_080439.1|	gi|21312960|ref|NP_080439.1|	gi|21312960|ref|NP_080439.1|	AHYGHSEYQYAWR	AHY(0.429)GHS(0.558)EY(0.013)QYAWR	S	6	164	164	NaN	NaN	NaN	NaN	NaN	-0.67096	NaN	NaN	0.558227	0.0101953	59.418	51.634	59.418	-0.40076	1942400
Plakophilin 2	Pkp2	Q9CQ73	gi|21312960|ref|NP_080439.1|	gi|21312960|ref|NP_080439.1|	gi|21312960|ref|NP_080439.1|	LHVVENDFVGRQSPVTRDYDMLK	LHVVENDFVGRQS(0.954)PVT(0.228)RDY(0.818)DMLK	S	13	102	102	-0.0570976	-1.25141	0.0943261	3.24106	1.59546	-0.420162	-0.64066	0.401372	0.954027	5.82e-07	57.738	52.975	57.738	0.11983	12377000
Plakophilin-4	Pkp4	Q68FH0	gi|568916324|ref|XP_006499243.1|	gi|568916324|ref|XP_006499243.1|	gi|568916324|ref|XP_006499243.1|;gi|568916322|ref|XP_006499242.1|;gi|1039760196|ref|XP_017173041.1|;gi|1039760192|ref|XP_017173038.1|;gi|1039760190|ref|XP_017173036.1|;gi|1039760188|ref|XP_017173035.1|;gi|568916318|ref|XP_006499240.1|;gi|568916316|ref|XP_006499239.1|;gi|1039760185|ref|XP_017173033.1|;gi|1039760182|ref|XP_017173032.1|;gi|1039760180|ref|XP_017173030.1|;gi|1039760178|ref|XP_01717302…	NNYALNTAATYAEPYRPVQYR	NNYALNT(0.015)AAT(0.484)Y(0.409)AEPY(0.075)RPVQY(0.017)R	T	10	135;135;135;135;327;327;328;328;328;328;328;328;328;328;474;475;476;476;476;473;476;476	476	NaN	NaN	NaN	NaN	NaN	NaN	NaN	NaN	0.484188	0.000876521	66.152	62.732	66.152	-0.1308	0
Cardiac phospholamban	Pln	P61014	gi|213512816|ref|NP_001135399.1|	gi|213512816|ref|NP_001135399.1|	gi|213512816|ref|NP_001135399.1|;gi|12963503|ref|NP_075618.1|	RASTIEMPQQAR	RAS(1)T(1)IEMPQQAR	S	3	16;16	16	NaN	NaN	-5.36681	0.216035	-4.08176	NaN	NaN	NaN	1	0.000279485	66.022	59.335	66.022	3.1387	8470600
Cardiac phospholamban	Pln	P61014	gi|213512816|ref|NP_001135399.1|	gi|213512816|ref|NP_001135399.1|	gi|213512816|ref|NP_001135399.1|;gi|12963503|ref|NP_075618.1|	MEKVQYLTR	MEKVQY(0.423)LT(0.577)R	T	8	8;8	8	0.252211	NaN	NaN	NaN	0.132956	NaN	-1.49271	-0.961858	0.577265	0.00304342	63.816	54.494	63.816	-0.98046	1172800
Cardiac phospholamban	Pln	P61014	gi|213512816|ref|NP_001135399.1|	gi|213512816|ref|NP_001135399.1|	gi|213512816|ref|NP_001135399.1|;gi|12963503|ref|NP_075618.1|	RASTIEMPQQAR	RAS(1)T(1)IEMPQQAR	T	4	17;17	17	NaN	NaN	-4.41244	-0.0259958	-3.12739	NaN	NaN	NaN	1	0.000279485	66.022	59.335	66.022	3.1387	3969000
cAMP-dependent protein kinase type I-alpha regulatory subunit	Prkar1a	Q9DBC7	gi|928192558|ref|NP_001300905.1|	gi|928192558|ref|NP_001300905.1|	gi|928192558|ref|NP_001300905.1|;gi|928192556|ref|NP_001300904.1|;gi|928192553|ref|NP_001300903.1|;gi|928192551|ref|NP_001300902.1|;gi|30794476|ref|NP_068680.1|;gi|1039736073|ref|XP_017169829.1|;gi|568972243|ref|XP_006532572.1|	TDSREDEISPPPPNPVVK	T(0.031)DS(0.031)REDEIS(0.938)PPPPNPVVK	S	9	83;83;83;83;83;83;212	83	0.84002	0.831951	NaN	NaN	NaN	-0.208411	0.793785	-0.512259	0.938169	0.000250721	48.053	40.542	43.37	-0.19433	5508600
Tyrosine-protein phosphatase non-receptor type 11	Ptpn11	P35235	gi|158508568|ref|NP_001103462.1|	gi|158508568|ref|NP_001103462.1|	gi|158508568|ref|NP_001103462.1|;gi|6755228|ref|NP_035332.1|	IQNTGDYYDLYGGEKFATLAELVQYYMEHHGQLK	IQNT(0.213)GDY(0.192)Y(0.192)DLY(0.192)GGEKFAT(0.213)LAELVQYYMEHHGQLK	T	4	59;59	59	NaN	NaN	NaN	NaN	NaN	NaN	NaN	NaN	0.212637	1.25e-12	53.545	52.454	53.545	0.19008	0
Tyrosine-protein phosphatase non-receptor type 11	Ptpn11	P35235	gi|158508568|ref|NP_001103462.1|	gi|158508568|ref|NP_001103462.1|	gi|158508568|ref|NP_001103462.1|;gi|6755228|ref|NP_035332.1|	IQNTGDYYDLYGGEKFATLAELVQYYMEHHGQLK	IQNT(0.213)GDY(0.192)Y(0.192)DLY(0.192)GGEKFAT(0.213)LAELVQYYMEHHGQLK	T	18	73;73	73	NaN	NaN	NaN	NaN	NaN	NaN	NaN	NaN	0.212637	1.25e-12	53.545	52.454	53.545	0.19008	0
Caveolae-associated protein 1	Ptrf	O54724	gi|6679567|ref|NP_033012.1|	gi|6679567|ref|NP_033012.1|	gi|6679567|ref|NP_033012.1|;gi|755537752|ref|XP_011247119.1|	MEDVTLHIVERPYSGFPDASSEGPEPTQGEAR	MEDVTLHIVERPY(0.467)S(0.53)GFPDAS(0.001)S(0.001)EGPEPTQGEAR	S	14	14;14	14	1.17868	NaN	0.541752	0.69575	2.46975	-0.874971	-1.37057	-0.154218	0.53047	5.29e-16	68.461	64.599	68.461	-0.22923	20761000
40S ribosomal protein S27-like	Rps27l	Q6ZWY3	gi|298231238|ref|NP_001177187.1|	gi|298231238|ref|NP_001177187.1|	gi|298231238|ref|NP_001177187.1|;gi|26024336|ref|NP_081291.1|;gi|13385958|ref|NP_080743.1|;gi|1039794007|ref|XP_017169030.1|;gi|902763256|ref|NP_001298030.1|	LVQSPNSYFMDVK	LVQS(0.006)PNS(0.543)Y(0.451)FMDVK	S	7	30;30;30;30;30	30	0.183055	0.174138	-0.262271	NaN	NaN	0.264618	-0.74939	-0.782998	0.543396	0.00495864	46.88	39.269	46.88	-1.0164	3052800
SHC-transforming protein 1	Shc1	P98083	gi|568922236|ref|XP_006501276.1|	gi|568922236|ref|XP_006501276.1|	gi|568922236|ref|XP_006501276.1|;gi|568922234|ref|XP_006501275.1|;gi|15778828|ref|NP_035498.2|;gi|164664522|ref|NP_001106802.1|	ELFDDPSYVNIQNLDK	ELFDDPS(0.545)Y(0.455)VNIQNLDK	S	7	256;256;312;422	422	2.91884	1.84483	1.95486	NaN	-0.00962436	-1.09882	-0.342963	-0.259219	0.544793	9.53e-05	55.755	50.543	52.372	0.15906	12539000
Mitochondrial 2-oxoglutarate/malate carrier protein	Slc25a11	Q9CR62	gi|21312994|ref|NP_077173.1|	gi|21312994|ref|NP_077173.1|	gi|21312994|ref|NP_077173.1|;gi|568975424|ref|XP_006534089.1|	AVVVNAAQLASYSQSK	AVVVNAAQLAS(0.44)Y(0.362)S(0.099)QS(0.099)K	S	11	201;169	201	NaN	NaN	NaN	NaN	NaN	NaN	NaN	NaN	0.440477	0.0315777	65.374	59.292	65.374	0.063372	0
Histone-lysine N-methyltransferase Smyd1	Smyd1	G5E8R7	gi|236461142|ref|NP_033892.2|	gi|236461142|ref|NP_033892.2|	gi|236461142|ref|NP_033892.2|;gi|236461014|ref|NP_001153599.1|	QEPVFADTNLYVLR	QEPVFADT(0.539)NLY(0.461)VLR	T	8	333;346	312	NaN	NaN	NaN	NaN	NaN	NaN	-1.37595	NaN	0.53904	0.00473093	41.621	22.798	41.621	-0.49702	1955900
Spermatogenesis-associated 31 subfamily D, member 1C	Spata31d1c	E9QAF1	gi|253795511|ref|NP_001077359.2|	gi|253795511|ref|NP_001077359.2|	gi|253795511|ref|NP_001077359.2|	SISTAKKSVK	SIS(0.002)T(0.499)AKKS(0.499)VK	S	8	779	779	NaN	NaN	NaN	NaN	NaN	NaN	NaN	NaN	0.498855	0.00288807	49.16	20.986	46.334	-1.1077	0
Spermatogenesis-associated 31 subfamily D, member 1C	Spata31d1c	E9QAF1	gi|253795511|ref|NP_001077359.2|	gi|253795511|ref|NP_001077359.2|	gi|253795511|ref|NP_001077359.2|	SISTAKKSVK	SIS(0.002)T(0.499)AKKS(0.499)VK	T	4	775	775	NaN	NaN	NaN	NaN	NaN	NaN	NaN	NaN	0.498855	0.00288807	49.16	20.986	46.334	-1.1077	0
Sarcalumenin	Srl	Q7TQ48	gi|34328417|ref|NP_780556.2|	gi|34328417|ref|NP_780556.2|	gi|34328417|ref|NP_780556.2|;gi|568994404|ref|XP_006521751.1|;gi|568994402|ref|XP_006521750.1|;gi|1039750401|ref|XP_017172334.1|;gi|1039750399|ref|XP_017172333.1|	TLMLNEDKPADDYSAVLQR	TLMLNEDKPADDY(0.377)S(0.623)AVLQR	S	14	491;535;536;53;54	491	1.66016	1.68531	-1.19364	NaN	NaN	NaN	NaN	NaN	0.622723	8.99e-05	63.691	60.155	62.94	1.0333	7910500
Serine/threonine-protein kinase TNNI3K	Tnni3k	Q5GIG6	gi|260166668|ref|NP_796040.3|	gi|260166668|ref|NP_796040.3|	gi|260166668|ref|NP_796040.3|;gi|755504053|ref|XP_011238457.1|;gi|755504051|ref|XP_011238456.1|	HYKRPQDELPCNEYSQPGGDGSYVSVPSPLGK	HYKRPQDELPCNEY(0.012)S(0.041)QPGGDGS(0.422)Y(0.382)VS(0.141)VPS(0.002)PLGK	S	22	423;423;423	423	NaN	NaN	NaN	NaN	NaN	NaN	NaN	NaN	0.421763	1.49e-11	46.412	45.712	46.412	0.26981	0
Tropomyosin alpha-1 chain	Tpm1	P58771	gi|256000780|ref|NP_001157720.1|	gi|256000780|ref|NP_001157720.1|	gi|256000780|ref|NP_001157720.1|;gi|256000786|ref|NP_001157723.1|;gi|568961221|ref|XP_006511105.1|;gi|256000792|ref|NP_001157726.1|;gi|568961223|ref|XP_006511106.1|	AISEELDHALNDMTSI	AISEELDHALNDMT(0.189)S(0.811)I	S	15	283;283;283;247;283	283	-1.49912	-0.396897	1.10512	NaN	-0.806028	0.184906	-0.57038	1.21402	0.811481	0.00252185	64.275	58.38	64.275	0.069218	64899000
Trem-like transcript 1 protein	Treml1	Q8K558	gi|575402988|ref|NP_001276386.1|	gi|575402988|ref|NP_001276386.1|	gi|575402988|ref|NP_001276386.1|;gi|58037247|ref|NP_082039.1|	SVTYATVVFPGGDKGK	S(0.105)VT(0.503)Y(0.384)AT(0.008)VVFPGGDKGK	T	3	285;290	285	NaN	NaN	NaN	NaN	NaN	-0.67096	NaN	NaN	0.502839	0.00701205	80.507	67.716	80.507	-0.2577	1522900
Short transient receptor potential channel 4	Trpc4	Q9QUQ5	gi|358439504|ref|NP_001240612.1|	gi|358439504|ref|NP_001240612.1|	gi|358439504|ref|NP_001240612.1|;gi|1039764126|ref|XP_017175023.1|;gi|358439497|ref|NP_001240611.1|;gi|8394487|ref|NP_058680.1|;gi|568922410|ref|XP_006501359.1|	LLVQKGVSVPR	LLVQKGVS(1)VPR	S	8	167;167;167;167;167	167	NaN	NaN	NaN	NaN	NaN	NaN	NaN	NaN	1	0.000981086	49.3	11.332	49.3	-1.2964	0
Titin	Ttn	A2ASS6	gi|755499202|ref|XP_011237740.1|	gi|755499202|ref|XP_011237740.1|	gi|755499202|ref|XP_011237740.1|;gi|1039759925|ref|XP_017172628.1|;gi|77812699|ref|NP_082280.2|;gi|77812697|ref|NP_035782.3|	DGLPLKESEYVR	DGLPLKES(0.695)EY(0.305)VR	S	8	28489;29432;21069;27650	29396	NaN	0.231819	0.449705	NaN	NaN	NaN	NaN	NaN	0.694865	0.0162073	51.286	43.676	51.286	-0.54141	1109200
Titin	Ttn	A2ASS6	gi|755499202|ref|XP_011237740.1|	gi|755499202|ref|XP_011237740.1|	gi|755499202|ref|XP_011237740.1|;gi|1039759925|ref|XP_017172628.1|;gi|77812699|ref|NP_082280.2|;gi|77812697|ref|NP_035782.3|	LSEYKSELDYMSKEEK	LSEY(0.001)KS(0.999)ELDY(0.997)MS(0.003)KEEK	S	6	33102;34045;25682;32263	34009	-0.446801	-0.830967	0.296681	-0.0032706	0.408421	0.0595892	0.476924	NaN	0.998895	5.73e-05	118.96	105.17	118.96	-0.27387	18700000
Titin	Ttn	A2ASS6	gi|755499202|ref|XP_011237740.1|	gi|755499202|ref|XP_011237740.1|	gi|755499202|ref|XP_011237740.1|;gi|1039759925|ref|XP_017172628.1|;gi|77812699|ref|NP_082280.2|;gi|77812697|ref|NP_035782.3|	LSYKVTNLQEGAIYYFR	LS(0.545)Y(0.416)KVT(0.039)NLQEGAIYYFR	S	2	27217;28160;19797;26378	28124	NaN	NaN	NaN	NaN	NaN	NaN	NaN	-0.154218	0.545323	0.000983852	41.088	34.138	41.088	-0.41025	3108200
Titin	Ttn	A2ASS6	gi|755499202|ref|XP_011237740.1|	gi|755499202|ref|XP_011237740.1|	gi|755499202|ref|XP_011237740.1|;gi|1039759925|ref|XP_017172628.1|;gi|77812699|ref|NP_082280.2|;gi|77812697|ref|NP_035782.3|	RRTPSPDYDLYYYR	RRT(1)PS(1)PDY(1)DLYYYR	S	5	32954;33897;25534;32115	33861	0.541478	0.537096	0.149835	NaN	-4.91105	0.889355	0.341348	0.686358	1	9.9e-08	123.76	116.81	97.095	0.24686	726190000
Titin	Ttn	A2ASS6	gi|755499202|ref|XP_011237740.1|	gi|755499202|ref|XP_011237740.1|	gi|755499202|ref|XP_011237740.1|;gi|1039759925|ref|XP_017172628.1|;gi|77812699|ref|NP_082280.2|;gi|77812697|ref|NP_035782.3|	YSSPPAHVKVEDR	Y(0.667)S(0.667)S(0.667)PPAHVKVEDR	S	2	33025;33968;25605;32186	33932	NaN	NaN	NaN	-1.44521	NaN	NaN	NaN	NaN	0.666667	0.000362806	55.011	47.645	55.011	-0.3281	957890
Titin	Ttn	A2ASS6	gi|755499202|ref|XP_011237740.1|	gi|755499202|ref|XP_011237740.1|	gi|755499202|ref|XP_011237740.1|;gi|1039759925|ref|XP_017172628.1|;gi|77812699|ref|NP_082280.2|;gi|77812697|ref|NP_035782.3|	YSSPPAHVKVEDR	Y(0.896)S(0.261)S(0.843)PPAHVKVEDR	S	3	33026;33969;25606;32187	33933	NaN	NaN	NaN	-1.44521	NaN	NaN	NaN	NaN	0.842753	0.000362806	83.54	76.175	83.54	-0.82421	6015600
Titin	Ttn	A2ASS6	gi|755499202|ref|XP_011237740.1|	gi|755499202|ref|XP_011237740.1|	gi|755499202|ref|XP_011237740.1|;gi|1039759925|ref|XP_017172628.1|;gi|77812699|ref|NP_082280.2|;gi|77812697|ref|NP_035782.3|	YSTYHVPTKEETSTSYAELR	YSTYHVPT(0.002)KEET(0.013)S(0.04)T(0.128)S(0.433)Y(0.384)AELR	S	15	33056;33999;25636;32217	33963	NaN	NaN	NaN	NaN	NaN	NaN	NaN	NaN	0.433464	0.000317703	40.432	34.461	40.432	0.59917	0
Titin	Ttn	A2ASS6	gi|755499202|ref|XP_011237740.1|	gi|755499202|ref|XP_011237740.1|	gi|755499202|ref|XP_011237740.1|;gi|1039759925|ref|XP_017172628.1|;gi|77812699|ref|NP_082280.2|;gi|77812697|ref|NP_035782.3|	AWTPVTYTVTR	AWTPVT(0.059)Y(0.225)T(0.279)VT(0.437)R	T	10	17553;18496;10133;16714	18460	NaN	NaN	NaN	NaN	NaN	NaN	NaN	NaN	0.437068	0.00645539	53.237	43.582	53.237	0.28077	0
Titin	Ttn	A2ASS6	gi|755499202|ref|XP_011237740.1|	gi|755499202|ref|XP_011237740.1|	gi|755499202|ref|XP_011237740.1|;gi|1039759925|ref|XP_017172628.1|;gi|77812699|ref|NP_082280.2|;gi|77812697|ref|NP_035782.3|	LSWTQVSNEVQALNYKVTK	LSWTQVSNEVQALNY(0.297)KVT(0.702)K	T	18	25746;26689;18326;24907	26653	-0.0122983	-0.189956	-0.349268	0.540634	0.0570557	NaN	-0.209589	0.47929	0.702311	0.00504728	45.347	42.546	45.347	0.099111	17403000
Titin	Ttn	A2ASS6	gi|755499202|ref|XP_011237740.1|	gi|755499202|ref|XP_011237740.1|	gi|755499202|ref|XP_011237740.1|;gi|1039759925|ref|XP_017172628.1|;gi|77812699|ref|NP_082280.2|;gi|77812697|ref|NP_035782.3|	RRTPSPDYDLYYYR	RRT(1)PS(1)PDY(1)DLYYYR	T	3	32952;33895;25532;32113	33859	0.011017	0.00187408	-0.383301	NaN	NaN	0.359865	-0.200016	0.140974	1	1.56e-05	97.095	90.659	97.095	0.24686	664380000
Titin	Ttn	A2ASS6	gi|755499202|ref|XP_011237740.1|	gi|755499202|ref|XP_011237740.1|	gi|755499202|ref|XP_011237740.1|;gi|1039759925|ref|XP_017172628.1|;gi|77812699|ref|NP_082280.2|;gi|77812697|ref|NP_035782.3|	TRYTVTDLQAGEEYKFR	T(0.34)RY(0.295)T(0.34)VT(0.026)DLQAGEEYKFR	T	1	29193;30136;21773;28354	30100	NaN	NaN	NaN	NaN	NaN	NaN	NaN	NaN	0.339829	0.00210978	45.618	39.948	45.618	-0.044672	0
Titin	Ttn	A2ASS6	gi|755499202|ref|XP_011237740.1|	gi|755499202|ref|XP_011237740.1|	gi|755499202|ref|XP_011237740.1|;gi|1039759925|ref|XP_017172628.1|;gi|77812699|ref|NP_082280.2|;gi|77812697|ref|NP_035782.3|	TRYTVTDLQAGEEYKFR	T(0.34)RY(0.295)T(0.34)VT(0.026)DLQAGEEYKFR	T	4	29196;30139;21776;28357	30103	NaN	NaN	NaN	NaN	NaN	NaN	NaN	NaN	0.339829	0.00210978	45.618	39.948	45.618	-0.044672	0
Vinculin	Vcl	Q64727	gi|31543942|ref|NP_033528.3|	gi|31543942|ref|NP_033528.3|	gi|31543942|ref|NP_033528.3|;gi|568987488|ref|XP_006518985.1|	SFLDSGYRILGAVAK	SFLDS(0.621)GY(0.379)RILGAVAK	S	5	820;820	820	NaN	NaN	0.916056	NaN	NaN	0.395973	-0.218193	NaN	0.62106	5.16e-13	109.07	90.682	85.837	0.16862	13331000
Voltage-dependent anion-selective channel protein 3	Vdac3	Q5EBQ0	gi|312222784|ref|NP_001185927.1|	gi|312222784|ref|NP_001185927.1|	gi|312222784|ref|NP_001185927.1|	SCSGVMEFSTSGHAYTDTGK	SCSGVMEFS(0.005)T(0.005)S(0.014)GHAY(0.437)T(0.496)DT(0.043)GK	T	16	50	50	NaN	NaN	NaN	NaN	NaN	NaN	NaN	NaN	0.496487	0.00020904	44.788	40.263	44.788	-0.36181	0
Vimentin	Vim	P20152	gi|31982755|ref|NP_035831.2|	gi|31982755|ref|NP_035831.2|	gi|31982755|ref|NP_035831.2|	SLYSSSPGGAYVTR	SLYSSS(0.001)PGGAY(0.451)VT(0.548)R	T	13	63	63	NaN	NaN	NaN	-1.44521	NaN	NaN	NaN	NaN	0.54781	0.000814094	56.569	46.726	56.569	0.93841	1130000
V-set and transmembrane domain-containing protein 4	Vstm4	T1NXB5	gi|30520277|ref|NP_848906.1|	gi|30520277|ref|NP_848906.1|	gi|30520277|ref|NP_848906.1|	ITEENLTYAELELIKPHR	IT(0.002)EENLT(0.533)Y(0.465)AELELIKPHR	T	7	287	287	0.894734	0.630577	NaN	NaN	NaN	NaN	NaN	-0.25396	0.533016	0.0125434	41.088	35.125	41.088	0.64433	1723600
