# Supplementary material for: Altered Tyrosine Phosphorylation of Cardiac Proteins Prompts Contractile Dysfunction in Hypertrophic Cardiomyopathy
Source: Research Square preprint supplement (doi:10.21203/rs.3.rs-100810/v1), 2020-11-12
Supplement: Supplementary file 4 [file e5568437d7d744cc292b7351.xlsx]

## Sheet: Sheet1
Gi Accession	Uniprot/UniParc	Uniprot Name	Primary Gene Name	logFC	Ratio TgErbB2/Control	Ordinary t-statistic	Moderated t-statistic	Ordinary p-value	Moderated p-value	"-log(pval)"	p-val<0.05	Ordinary q-value	Moderated q-value	q-val<0.05	Residual degrees of freedom	Degrees of freedom associated with estimated prior value for the variance	Estimated prior value for the variance	Sample variance	Posterior value of the variance	Ntg1 log2 intensity	Ntg2 log2 intensity	Ntg3 log2 intensity	TgErbB2-1 log2 intensity	TgErbB2-2 log2 intensity	TgErbB2-3 log2 intensity
6680027	P26443	Glutamate dehydrogenase 1, mitochondrial (GDH 1) (EC 1.4.1.3)	Glud1	2.62454	6.16688	1.86392	2.38731	0.135783	0.0502927	1.29849	N	0.08253	0.0454499	Y	4	2.63326	0.0491856	2.97402	1.81292	-2.70619	1.52803	1.31162	-3.1694	-2.31944	-2.25132
6755763	O08583	THO complex subunit 4 (Tho4) (Ally of AML-1 and LEF-1) (Aly/REF export factor) (REF1-I) (RNA and export factor-binding protein 1) (Transcriptional coactivator Aly/REF)	Alyref	2.22493	4.67488	2.5319	3.21583	0.0645342	0.0158654	1.79955	Y	0.0593987	0.0290405	Y	4	2.63326	0.0491856	1.15833	0.718022	-1.41496	0.991359	1.11068	-1.39213	-2.41035	-2.18523
6996913	P07356	Annexin A2 (Annexin II) (Annexin-2) (Calpactin I heavy chain) (Calpactin-1 heavy chain) (Chromobindin-8) (Lipocortin II) (Placental anticoagulant protein IV) (PAP-IV) (Protein I) (p36)	Anxa2	2.21052	4.62841	4.49512	5.54637	0.0108631	0.00103685	2.98428	Y	0.0432996	0.0256173	Y	4	2.63326	0.0491856	0.36274	0.238266	0.530624	1.32037	1.0921	-0.683113	-2.08268	-0.92266
568923152	Q62009	Periostin (PN) (Osteoblast-specific factor 2) (OSF-2)	Postn	2.1634	4.47969	3.15232	3.96948	0.034437	0.00601667	2.22064	Y	0.0455507	0.0256173	Y	4	2.63326	0.0491856	0.706485	0.445551	1.27614	1.10574	1.13438	0.372855	-1.7679	-1.57889
124244033	Q9QYR6	Microtubule-associated protein 1A (MAP-1A) [Cleaved into: MAP1A heavy chain; MAP1 light chain LC2]	Map1a	1.93283	3.81804	2.21042	2.80713	0.0915836	0.0277615	1.55656	Y	0.0709021	0.0343866	Y	4	2.63326	0.0491856	1.14692	0.711141	0.423938	0.171667	0.365538	0.128371	-2.42334	-2.54239
13385942	Q9CZU6	Citrate synthase, mitochondrial (EC 2.3.3.1) (Citrate (Si)-synthase)	Cs	1.91711	3.77667	2.59083	3.27247	0.0606311	0.0147076	1.83246	Y	0.0576563	0.0288518	Y	4	2.63326	0.0491856	0.821316	0.514797	-0.269017	1.84749	1.89628	-0.542315	-1.14829	-0.585983
15011841	P46412	Glutathione peroxidase 3 (GPx-3) (GSHPx-3) (EC 1.11.1.9) (Plasma glutathione peroxidase) (GPx-P) (GSHPx-P)	Gpx3	1.77849	3.43066	3.11169	3.88092	0.0358132	0.00671293	2.17309	Y	0.0463271	0.0256173	Y	4	2.63326	0.0491856	0.490004	0.315008	1.19461	1.5382	1.24691	0.66854	-1.07674	-0.947538
311771533	P50462	Cysteine and glycine-rich protein 3 (Cysteine-rich protein 3) (CRP3) (LIM domain protein, cardiac) (Muscle LIM protein)	Csrp3	1.7536	3.372	3.99131	4.8745	0.0162472	0.00210132	2.67751	Y	0.0432996	0.0256173	Y	4	2.63326	0.0491856	0.289549	0.19413	-0.0629404	1.23796	1.14964	-0.724618	-1.05824	-1.15329
6679166	Q62000	Mimecan (Osteoglycin)	Ogn	1.73061	3.31869	2.2797	2.88222	0.0848143	0.0250099	1.60189	Y	0.0681161	0.0340827	Y	4	2.63326	0.0491856	0.86444	0.540802	1.65062	1.50186	1.57713	1.36146	-0.885257	-0.938436
31981592	Q9EQP2	EH domain-containing protein 4 (PAST homolog 2) (mPAST2)	Ehd4	1.66727	3.17613	3.32449	4.10846	0.0292556	0.00507881	2.29424	Y	0.0447269	0.0256173	Y	4	2.63326	0.0491856	0.377271	0.247028	0.439917	0.811609	0.85996	-0.0309887	-1.65242	-1.20692
84871986	P11352	Glutathione peroxidase 1 (GPx-1) (GSHPx-1) (EC 1.11.1.9) (Cellular glutathione peroxidase) (Selenium-dependent glutathione peroxidase 1)	Gpx1	1.64738	3.13263	1.94661	2.46982	0.123436	0.0446954	1.34974	Y	0.0798277	0.0430467	Y	4	2.63326	0.0491856	1.07428	0.667339	-2.26046	0.599233	-0.330107	-2.45814	-2.17141	-2.30391
6754036	P05202	Aspartate aminotransferase, mitochondrial (mAspAT) (EC 2.6.1.1) (EC 2.6.1.7) (Fatty acid-binding protein) (FABP-1) (Glutamate oxaloacetate transaminase 2) (Kynurenine aminotransferase 4) (Kynurenine aminotransferase IV) (Kynurenine--oxoglutarate transaminase 4) (Kynurenine--oxoglutarate transaminase IV) (Plasma membrane-associated fatty acid-binding protein) (FABPpm) (Transaminase A)	Got2	1.64329	3.12377	1.86096	2.36397	0.136248	0.0520044	1.28396	N	0.08253	0.0462092	Y	4	2.63326	0.0491856	1.16961	0.724828	-1.86148	0.969152	0.225779	-2.21404	-1.99856	-1.38381
160333372	P51885	Lumican (Keratan sulfate proteoglycan lumican) (KSPG lumican)	Lum	1.5719	2.97296	2.22211	2.80174	0.0904002	0.0279709	1.55329	Y	0.070555	0.0343866	Y	4	2.63326	0.0491856	0.750602	0.472155	1.12856	1.1412	1.00955	0.924176	-1.03998	-1.32058
595582170	Q64337	Sequestosome-1 (STONE14) (Ubiquitin-binding protein p62)	Sqstm1	1.53922	2.90637	1.63857	2.08473	0.176645	0.0777554	1.10927	N	0.0928764	0.0557965	N	4	2.63326	0.0491856	1.32361	0.817693	0.759027	-0.0203278	-0.0965042	0.378591	-2.67299	-1.68106
13384732	Q9CQN3	Mitochondrial import receptor subunit TOM6 homolog (Overexpressed breast tumor protein homolog) (Translocase of outer membrane 6 kDa subunit homolog)	Tomm6	1.45397	2.7396	6.21259	6.77575	0.00341615	0.000328134	3.48395	Y	0.0432996	0.0256173	Y	4	2.63326	0.0491856	0.082159	0.0690693	-2.12387	-1.452	-1.80327	-3.25386	-3.01698	-3.4702
225579033	P54071	Isocitrate dehydrogenase [NADP], mitochondrial (IDH) (EC 1.1.1.42) (ICD-M) (IDP) (NADP(+)-specific ICDH) (Oxalosuccinate decarboxylase)	Idh2	1.40492	2.64803	2.14195	2.69161	0.0988712	0.0326379	1.48628	Y	0.0727404	0.0367489	Y	4	2.63326	0.0491856	0.645323	0.408669	-0.696729	1.40655	0.971151	-0.823628	-1.09547	-0.614694
6755256	Q9WUB3	Glycogen phosphorylase, muscle form (EC 2.4.1.1) (Myophosphorylase)	Pygm	1.3977	2.63481	6.34257	6.79576	0.00316475	0.000322483	3.49149	Y	0.0432996	0.0256173	Y	4	2.63326	0.0491856	0.072843	0.0634516	-0.108626	0.634154	0.332258	-1.1694	-1.14341	-1.0225
569009581	UPI0003D783AC	biglycan isoform X1	Bgn	1.3509	2.55072	1.75583	2.22094	0.153965	0.0638804	1.19463	N	0.0870134	0.0503817	N	4	2.63326	0.0491856	0.887928	0.554965	0.641134	0.344862	0.55941	0.685264	-1.46481	-1.72776
34538606	P03903	NADH-ubiquinone oxidoreductase chain 4L (EC 1.6.5.3) (NADH dehydrogenase subunit 4L)	Mtnd4l	1.35088	2.55067	4.60453	5.30183	0.00999674	0.00133161	2.87562	Y	0.0432996	0.0256173	Y	4	2.63326	0.0491856	0.129108	0.0973804	-2.25257	-1.33867	-1.6378	-3.23969	-2.86235	-3.17963
160298168	Q7TMG8	Glioblastoma amplified sequence (Protein NipSnap homolog 2)	Nipsnap2	1.33748	2.52709	2.258	2.82223	0.0868727	0.0271835	1.56569	Y	0.0683402	0.0343866	Y	4	2.63326	0.0491856	0.526281	0.336885	-0.507177	1.24539	1.28807	-0.697454	-0.691797	-0.5969
31982186	P08249	Malate dehydrogenase, mitochondrial (EC 1.1.1.37)	Mdh2	1.3366	2.52555	1.98502	2.49746	0.118121	0.0429678	1.36686	Y	0.0781748	0.0424055	Y	4	2.63326	0.0491856	0.680085	0.429631	-0.559282	1.5027	1.01231	-1.05116	-0.816231	-0.186677
1039742895	UPI0007ECDD75	LOW QUALITY PROTEIN: protein AHNAK2	Ahnak2	1.30059	2.46329	2.15647	2.6981	0.0972728	0.0323409	1.49025	Y	0.0723353	0.0365347	Y	4	2.63326	0.0491856	0.545609	0.34854	0.354223	0.582681	0.315227	0.309569	-1.42213	-1.53707
6680618	P45952	Medium-chain specific acyl-CoA dehydrogenase, mitochondrial (MCAD) (EC 1.3.8.7)	Acadm	1.29769	2.45836	2.00297	2.51546	0.115724	0.0418802	1.37799	Y	0.0776377	0.0418225	Y	4	2.63326	0.0491856	0.629633	0.399208	-0.379732	1.67013	1.19885	-0.811297	-0.431132	-0.161403
1039745483	Q91Z83	Myosin-7 (Myosin heavy chain 7) (Myosin heavy chain slow isoform) (MyHC-slow) (Myosin heavy chain, cardiac muscle beta isoform) (MyHC-beta)	Myh7	1.27646	2.42245	1.43893	1.82808	0.223571	0.112596	0.948476	N	0.105827	0.0682136	N	4	2.63326	0.0491856	1.18041	0.731336	0.867952	0.66152	0.707543	1.22824	-1.24173	-1.57889
6755114	P99029	Peroxiredoxin-5, mitochondrial (EC 1.11.1.15) (Antioxidant enzyme B166) (AOEB166) (Liver tissue 2D-page spot 2D-0014IV) (PLP) (Peroxiredoxin V) (Prx-V) (Peroxisomal antioxidant enzyme) (Thioredoxin peroxidase PMP20)	Prdx5	1.24546	2.37094	2.80937	3.43411	0.0483478	0.0118775	1.92528	Y	0.0532009	0.0273793	Y	4	2.63326	0.0491856	0.294802	0.197298	-0.915228	0.531036	0.0244648	-1.60365	-1.33824	-1.15421
299758443	P28654	Decorin (Bone proteoglycan II) (PG-S2) (PG40)	Dcn	1.23374	2.35175	2.55336	3.14589	0.0630801	0.0174324	1.75864	Y	0.0590372	0.0301556	Y	4	2.63326	0.0491856	0.350197	0.230702	0.93219	0.98889	0.741492	0.578939	-0.60467	-1.01291
162287140	Q9R0G6	Cartilage oligomeric matrix protein (COMP)	Comp	1.22703	2.34085	1.96944	2.46845	0.120247	0.0447826	1.34889	Y	0.0785233	0.0430467	Y	4	2.63326	0.0491856	0.582263	0.370643	-0.0304919	-0.0749033	-0.565417	-0.267865	-1.87713	-2.20692
34328108	P11087	Collagen alpha-1(I) chain (Alpha-1 type I collagen)	Col1a1	1.2223	2.33318	2.49476	3.07726	0.0671415	0.0191328	1.71822	Y	0.0607464	0.0313348	Y	4	2.63326	0.0491856	0.360069	0.236655	0.532066	0.651613	0.383327	0.2568	-1.05372	-1.30296
18079339	Q99KI0	Aconitate hydratase, mitochondrial (Aconitase) (EC 4.2.1.3) (Citrate hydro-lyase)	Aco2	1.22068	2.33056	1.81915	2.28841	0.143018	0.0579666	1.23682	N	0.084267	0.0484209	Y	4	2.63326	0.0491856	0.675392	0.426802	-1.10941	1.0966	0.453222	-1.27902	-1.15069	-0.79191
568908031	UPI0003D75212	prolargin isoform X1	Prelp	1.21809	2.32639	1.68543	2.12691	0.167187	0.073161	1.13572	N	0.0899406	0.0543789	N	4	2.63326	0.0491856	0.783486	0.491985	0.453576	0.570347	0.373544	0.653894	-1.18294	-1.72776
281485615	Q9CXZ1	NADH dehydrogenase [ubiquinone] iron-sulfur protein 4, mitochondrial (Complex I-18 kDa) (CI-18 kDa) (Complex I-AQDQ) (CI-AQDQ) (NADH-ubiquinone oxidoreductase 18 kDa subunit)	Ndufs4	1.20813	2.31037	2.20166	2.73873	0.0924813	0.0305476	1.51502	Y	0.0709128	0.0353257	Y	4	2.63326	0.0491856	0.451664	0.291889	2.02402	3.29366	2.51882	0.65446	1.50977	2.04789
226423933	P08121	Collagen alpha-1(III) chain	Col3a1	1.18789	2.2782	2.09531	2.61196	0.104203	0.0365196	1.43747	Y	0.0745068	0.0387136	Y	4	2.63326	0.0491856	0.482111	0.310249	0.041368	0.166005	0.0453237	0.0261198	-1.62494	-1.71216
13928670	Q9EQH3	Vacuolar protein sorting-associated protein 35 (Maternal-embryonic 3) (Vesicle protein sorting 35)	Vps35	1.18729	2.27725	3.55146	4.18691	0.0237674	0.00462142	2.33522	Y	0.0433834	0.0256173	Y	4	2.63326	0.0491856	0.167646	0.12062	-0.636427	0.270112	0.228104	-1.1223	-1.54229	-1.0355
27754118	Q99MQ4	Asporin (Periodontal ligament-associated protein 1) (PLAP-1)	Aspn	1.17504	2.25799	2.03184	2.53595	0.111979	0.0406774	1.39065	Y	0.0762077	0.0415626	Y	4	2.63326	0.0491856	0.50167	0.322043	0.800696	0.528793	0.188585	0.428191	-1.13769	-1.29754
568992467	UPI0003D72964	protein kinase C and casein kinase substrate in neurons protein 2 isoform X1	Pacsin2	1.17169	2.25275	3.93228	4.5417	0.0170703	0.00305087	2.51558	Y	0.0432996	0.0256173	Y	4	2.63326	0.0491856	0.133176	0.0998335	-0.677992	-0.405901	-0.27742	-1.10092	-1.75295	-2.0225
164607147	Q8BPB5	EGF-containing fibulin-like extracellular matrix protein 1 (Fibulin-3) (FIBL-3)	Efemp1	1.15863	2.23245	2.07502	2.58416	0.106622	0.0379866	1.42037	Y	0.0747982	0.0392824	Y	4	2.63326	0.0491856	0.467666	0.301538	1.06436	0.826207	0.850036	0.850003	-0.655895	-0.929391
568910442	UPI0003D6E92C	protein enabled homolog isoform X1	Enah	1.14903	2.21764	1.59995	2.01854	0.18486	0.0855561	1.06775	N	0.0952158	0.058506	N	4	2.63326	0.0491856	0.773638	0.486046	-0.792229	-1.32995	-0.793354	-0.825205	-2.33049	-3.20692
19526794	P35762	CD81 antigen (26 kDa cell surface protein TAPA-1) (Target of the antiproliferative antibody 1) (CD antigen CD81)	Cd81	1.14244	2.20754	2.35478	2.90222	0.0781068	0.0243269	1.61391	Y	0.0650411	0.0340827	Y	4	2.63326	0.0491856	0.353069	0.232434	0.535156	0.142772	-0.0290176	-0.0167561	-1.42856	-1.3331
6678682	P16045	Galectin-1 (Gal-1) (14 kDa lectin) (Beta-galactoside-binding lectin L-14-I) (Galaptin) (Lactose-binding lectin 1) (Lectin galactoside-binding soluble 1) (S-Lac lectin 1)	Lgals1	1.11564	2.16691	1.53636	1.93917	0.199256	0.0959436	1.01798	N	0.0985571	0.0621854	N	4	2.63326	0.0491856	0.790954	0.496488	1.03627	1.05648	0.84067	1.29838	-0.999716	-0.71216
13195646	Q9DCT8	Cysteine-rich protein 2 (CRP-2) (Heart LIM protein)	Crip2	1.11281	2.16267	2.88992	3.47701	0.0445664	0.0112296	1.94964	Y	0.0506856	0.0273793	Y	4	2.63326	0.0491856	0.222414	0.153646	-0.519869	0.564217	0.616938	-1.02691	-0.964871	-0.68537
118130979	P0DOV2	Interferon-activable protein 204 (Ifi-204) (Interferon-inducible protein p204)	Ifi204	1.10414	2.14971	4.3737	4.86787	0.0119335	0.00211666	2.67435	Y	0.0432996	0.0256173	Y	4	2.63326	0.0491856	0.095597	0.0771727	-1.10612	-1.1102	-1.1537	-1.76039	-2.62494	-2.29712
568950986	Q1XH17	Tripartite motif-containing protein 72 (Mitsugumin-53) (Mg53)	Trim72	1.09133	2.1307	1.79457	2.24634	0.147165	0.0615847	1.21053	N	0.0855516	0.0498342	Y	4	2.63326	0.0491856	0.554726	0.354038	-0.260743	0.63766	1.02191	0.28265	-1.32011	-0.837697
13385310	Q99MN9	Propionyl-CoA carboxylase beta chain, mitochondrial (PCCase subunit beta) (EC 6.4.1.3) (Propanoyl-CoA:carbon dioxide ligase subunit beta)	Pccb	1.08945	2.12793	1.43641	1.81598	0.224238	0.114573	0.940919	N	0.105847	0.0687185	N	4	2.63326	0.0491856	0.862884	0.539864	-1.07241	0.540961	-0.0826011	-2.335	-1.275	-0.272405
111120329	Q01149	Collagen alpha-2(I) chain (Alpha-2 type I collagen)	Col1a2	1.08362	2.11935	2.04086	2.53294	0.110836	0.0408516	1.38879	Y	0.0759275	0.0415824	Y	4	2.63326	0.0491856	0.422885	0.274535	0.728176	0.658441	0.554778	0.603187	-0.79062	-1.12204
6755781	Q9Z1T2	Thrombospondin-4	Thbs4	1.07861	2.11199	1.42866	1.80589	0.226301	0.116247	0.934617	N	0.106672	0.0689608	N	4	2.63326	0.0491856	0.854987	0.535102	0.10225	-0.0442337	-0.526113	0.174795	-1.60467	-2.27404
7106301	Q61166	Microtubule-associated protein RP/EB family member 1 (APC-binding protein EB1) (End-binding protein 1) (EB1)	Mapre1	1.07605	2.10825	2.74335	3.30829	0.0517271	0.0140227	1.85317	Y	0.0541287	0.0285171	Y	4	2.63326	0.0491856	0.230777	0.158689	-0.19392	0.587142	0.684444	-0.54558	-1.25821	-0.346686
77020262	Q9WTP6	Adenylate kinase 2, mitochondrial (AK 2) (EC 2.7.4.3) (ATP-AMP transphosphorylase 2) (ATP:AMP phosphotransferase) (Adenylate monophosphate kinase)	Ak2	1.07429	2.10569	1.97458	2.45484	0.119541	0.0456615	1.34045	Y	0.0783646	0.0432951	Y	4	2.63326	0.0491856	0.444003	0.287269	-1.88051	-0.756637	-0.76851	-2.64712	-2.5632	-1.41821
31560506	Q9CR42	Ankyrin repeat domain-containing protein 1 (Cardiac ankyrin repeat protein)	Ankrd1	1.07006	2.09953	1.54104	1.9415	0.198158	0.0956204	1.01945	N	0.0985571	0.0621228	N	4	2.63326	0.0491856	0.723236	0.455653	0.96265	0.498283	0.591906	0.973019	-1.10266	-1.02771
952977828	Q3UER8	Fibrinogen gamma chain	Fgg	1.06312	2.08944	1.64704	2.06808	0.174896	0.0796479	1.09883	N	0.0925634	0.0565617	N	4	2.63326	0.0491856	0.62495	0.396384	0.454426	-0.123501	1.60985	-0.0659984	0.024348	-1.20692
6680502	O89051	Integral membrane protein 2B (Immature BRI2) (imBRI2) (Protein E25B) (Transmembrane protein BRI) (Bri) [Cleaved into: BRI2, membrane form (Mature BRI2) (mBRI2); BRI2 intracellular domain (BRI2 ICD); BRI2C, soluble form; Bri23 peptide (Bri2-23) (ABri23) (C-terminal peptide) (P23 peptide)]	Itm2b	1.0549	2.07757	3.15583	3.72042	0.0343214	0.00821161	2.08557	Y	0.0455507	0.0256173	Y	4	2.63326	0.0491856	0.167604	0.120594	0.702666	0.955134	0.686089	0.337335	-0.398666	-0.759466
7657329	Q9QZJ6	Microfibrillar-associated protein 5 (MFAP-5) (Microfibril-associated glycoprotein 2) (MAGP-2)	Mfap5	1.05	2.07052	2.27339	2.78982	0.0854069	0.0284401	1.54607	Y	0.0682331	0.0345205	Y	4	2.63326	0.0491856	0.319976	0.212478	0.69837	-0.134228	-0.119176	-0.185522	-1.42805	-1.09145
254540162	Q91ZA3	Propionyl-CoA carboxylase alpha chain, mitochondrial (PCCase subunit alpha) (EC 6.4.1.3) (Propanoyl-CoA:carbon dioxide ligase subunit alpha)	Pcca	1.03913	2.05499	1.75188	2.18982	0.154676	0.0668124	1.17514	N	0.0870134	0.0521095	N	4	2.63326	0.0491856	0.527742	0.337766	-2.63219	-1.01049	-1.86102	-3.42285	-3.01301	-2.18523
112807195	Q9D881	Cytochrome c oxidase subunit 5B, mitochondrial (Cytochrome c oxidase, subunit Vb) (MCG17741, isoform CRA_d) (MCG23026) (Predicted gene 11273)	Cox5b	1.0362	2.05082	1.99968	2.47744	0.116159	0.0442122	1.35446	Y	0.0776377	0.0428138	Y	4	2.63326	0.0491856	0.402775	0.262408	1.11405	2.02332	1.29926	-0.432497	0.895057	0.865458
1039774280	UPI0005ABA20C	glyceraldehyde-3-phosphate dehydrogenase isoform X2;glyceraldehyde-3-phosphate dehydrogenase isoform X1	Gapdh	1.03075	2.04309	2.14964	2.64675	0.0980213	0.0347678	1.45882	Y	0.0725351	0.0379003	Y	4	2.63326	0.0491856	0.344882	0.227497	0.65617	0.146197	0.0572335	0.101957	-1.38708	-0.947538
568928766	UPI0000356886	nuclease-sensitive element-binding protein 1 isoform X1	Ybx1	1.0266	2.03721	6.33281	6.04258	0.00318282	0.000638404	3.1949	Y	0.0432996	0.0256173	Y	4	2.63326	0.0491856	0.0394182	0.0432957	-0.218053	0.0297037	0.0256204	-0.807946	-1.27071	-1.16386
226823367	P97807	Fumarate hydratase, mitochondrial (Fumarase) (EC 4.2.1.2) (EF-3)	Fh	1.02509	2.03508	1.35411	1.71183	0.247147	0.133028	0.876057	N	0.112584	0.075004	N	4	2.63326	0.0491856	0.859613	0.537891	-1.22892	1.30351	0.505842	-1.04839	-0.809831	-0.636609
41406074	P18608	Non-histone chromosomal protein HMG-14 (High mobility group nucleosome-binding domain-containing protein 1)	Hmgn1	1.02263	2.03162	2.13754	2.63134	0.0993617	0.0355325	1.44937	Y	0.0727404	0.038481	Y	4	2.63326	0.0491856	0.343322	0.226556	-1.58597	-1.45887	-1.59669	-1.79402	-2.47877	-3.43664
227500281	Q99LC5	Electron transfer flavoprotein subunit alpha, mitochondrial (Alpha-ETF)	Etfa	1.02161	2.03018	1.93426	2.39974	0.1252	0.0494053	1.30623	Y	0.0800612	0.0452756	Y	4	2.63326	0.0491856	0.418437	0.271852	-0.367652	1.29053	0.62484	-0.899705	-0.464119	-0.153287
6680991	P17665	Cytochrome c oxidase subunit 7C, mitochondrial (Cytochrome c oxidase polypeptide VIIc)	Cox7c	1.01945	2.02714	1.80496	2.24948	0.145397	0.0613071	1.21249	N	0.0849614	0.0498122	Y	4	2.63326	0.0491856	0.478506	0.308075	1.36103	2.08941	1.59433	-0.281877	0.746485	1.52182
84781779	Q3UIU2	NADH dehydrogenase [ubiquinone] 1 beta subcomplex subunit 6 (Complex I-B17) (CI-B17) (NADH-ubiquinone oxidoreductase B17 subunit)	Ndufb6	1.01513	2.02108	1.84413	2.29446	0.138932	0.0574638	1.24061	N	0.0830446	0.0483379	Y	4	2.63326	0.0491856	0.454515	0.293608	0.0334318	1.13619	0.380455	-1.34611	-0.303014	0.153823
755529787	UPI0005ABA35E	pyruvate kinase PKM isoform X2	Pkm	1.00112	2.00155	4.71021	4.98951	0.00923828	0.00185399	2.73189	Y	0.0432996	0.0256173	Y	4	2.63326	0.0491856	0.0677612	0.0603871	0.710509	0.992592	0.92758	0.26504	-0.311203	-0.326506
651165917	P19783	Cytochrome c oxidase subunit 4 isoform 1, mitochondrial (Cytochrome c oxidase polypeptide IV) (Cytochrome c oxidase subunit IV isoform 1) (COX IV-1)	Cox4i1	0.995983	1.99444	2.21848	2.71516	0.0907656	0.0315749	1.50066	Y	0.070555	0.0359063	Y	4	2.63326	0.0491856	0.302332	0.201839	0.353312	1.17309	0.686089	-0.94701	-0.195516	0.367067
157951743	P50171	Estradiol 17-beta-dehydrogenase 8 (EC 1.1.1.62) (17-beta-hydroxysteroid dehydrogenase 8) (17-beta-HSD 8) (3-ketoacyl-[acyl-carrier-protein] reductase alpha subunit) (KAR alpha subunit) (3-oxoacyl-[acyl-carrier-protein] reductase) (EC 1.1.1.-) (Protein Ke6) (Ke-6) (Testosterone 17-beta-dehydrogenase 8) (EC 1.1.1.239)	Hsd17b8	0.986606	1.98152	1.44969	1.82481	0.220744	0.113128	0.94643	N	0.105002	0.0684147	N	4	2.63326	0.0491856	0.694749	0.438475	-0.28226	1.60302	1.5858	-0.521727	0.0762206	0.392249
31982520	P51174	Long-chain specific acyl-CoA dehydrogenase, mitochondrial (LCAD) (EC 1.3.8.8)	Acadl	0.984682	1.97888	2.37257	2.88014	0.0766066	0.025082	1.60064	Y	0.064425	0.0340827	Y	4	2.63326	0.0491856	0.258373	0.17533	0.112508	1.47127	1.02533	-0.331913	-0.0480711	0.0350462
110625954	Q9D6J6	NADH dehydrogenase [ubiquinone] flavoprotein 2, mitochondrial (EC 1.6.5.3) (EC 1.6.99.3) (NADH-ubiquinone oxidoreductase 24 kDa subunit)	Ndufv2	0.98249	1.97587	2.1935	2.68399	0.0933266	0.0329897	1.48162	Y	0.0709412	0.0369022	Y	4	2.63326	0.0491856	0.300934	0.200995	-0.465473	0.626232	-0.0688857	-1.44694	-1.03998	-0.368676
86613790	Q3U962	Collagen alpha-2(V) chain	Col5a2	0.981448	1.97445	1.69843	2.11972	0.164657	0.0739242	1.13121	N	0.0890032	0.0543789	N	4	2.63326	0.0491856	0.500874	0.321564	-0.142902	-0.418957	-0.481572	-0.210045	-1.71624	-2.06149
6755987	P29788	Vitronectin (VN) (S-protein) (Serum-spreading factor)	Vtn	0.979987	1.97245	1.62507	2.03321	0.179474	0.0837617	1.07695	N	0.0934357	0.0581153	N	4	2.63326	0.0491856	0.545494	0.34847	0.888862	-0.353259	0.307089	0.27022	-1.19299	-1.1745
161016833	P31428	Dipeptidase 1 (EC 3.4.13.19) (Membrane-bound dipeptidase 1) (MBD-1) (Microsomal dipeptidase) (Renal dipeptidase)	Dpep1	0.977631	1.96923	5.9109	5.69074	0.0041011	0.000897646	3.0469	Y	0.0432996	0.0256173	Y	4	2.63326	0.0491856	0.041033	0.0442694	0.300023	0.129436	0.0114967	-0.565569	-1.05442	-0.871947
126521835	P80314	T-complex protein 1 subunit beta (TCP-1-beta) (CCT-beta)	Cct2	0.972631	1.96242	2.98393	3.50315	0.0405808	0.0108539	1.96442	Y	0.0485152	0.0273793	Y	4	2.63326	0.0491856	0.159371	0.11563	-0.230162	0.407543	0.685431	-0.393508	-1.0169	-0.644672
6753504	P56392	Cytochrome c oxidase subunit 7A1, mitochondrial (Cytochrome c oxidase subunit VIIa-heart) (Cytochrome c oxidase subunit VIIa-H) (Cytochrome c oxidase subunit VIIa-muscle) (Cytochrome c oxidase subunit VIIa-M)	Cox7a1	0.969053	1.95755	1.48563	1.86637	0.211562	0.10656	0.972407	N	0.101705	0.0664378	N	4	2.63326	0.0491856	0.638211	0.404381	1.43519	2.50984	1.81889	-0.105708	1.10657	1.8559
1039727293	UPI0007EC512E	saccharopine dehydrogenase-like oxidoreductase isoform X1	Sccpdh	0.962166	1.94823	2.96682	3.48007	0.0412741	0.0111849	1.95137	Y	0.0489108	0.0273793	Y	4	2.63326	0.0491856	0.157764	0.114661	0.497095	1.07639	1.11172	0.444653	-0.31944	-0.326506
9789943	Q9QZZ6	Dermatopontin (Early quiescence protein 1) (EQ-1) (Tyrosine-rich acidic matrix protein) (TRAMP)	Dpt	0.956078	1.94003	1.75011	2.17638	0.154996	0.0681202	1.16672	N	0.0870134	0.0528728	N	4	2.63326	0.0491856	0.447659	0.289474	0.915521	0.648948	0.622776	0.841072	-0.644839	-0.877222
19526814	Q91YT0	NADH dehydrogenase [ubiquinone] flavoprotein 1, mitochondrial (EC 1.6.5.3) (EC 1.6.99.3) (Complex I-51kD) (CI-51kD) (NADH-ubiquinone oxidoreductase 51 kDa subunit)	Ndufv1	0.954151	1.93744	2.7279	3.23874	0.0525568	0.0153856	1.81289	Y	0.0541287	0.0289057	Y	4	2.63326	0.0491856	0.183514	0.130189	-0.632188	0.103464	-0.411257	-1.70997	-1.32496	-0.767503
695271688	P97450	ATP synthase-coupling factor 6, mitochondrial (ATPase subunit F6)	Atp5j	0.950507	1.93255	2.10345	2.57599	0.103251	0.0384292	1.41534	Y	0.0739819	0.0396203	Y	4	2.63326	0.0491856	0.306294	0.204228	-0.133795	1.04035	0.321746	-1.08593	-0.467431	-0.0698588
31980762	P09671	Superoxide dismutase [Mn], mitochondrial (EC 1.15.1.1)	Sod2	0.946473	1.92716	1.1958	1.51404	0.297814	0.176118	0.754197	N	0.127927	0.0886344	N	4	2.63326	0.0491856	0.939697	0.586183	0.244574	2.52867	1.75751	-0.206957	0.659762	1.23853
568986618	UPI0003D72213	clusterin isoform X1	Clu	0.931795	1.90765	2.60939	3.1075	0.0594584	0.0183624	1.73607	Y	0.0573721	0.0306599	Y	4	2.63326	0.0491856	0.191274	0.134868	0.884437	0.0767228	0.275452	-0.02156	-0.907873	-0.629341
165905609	Q8K4G1	Latent-transforming growth factor beta-binding protein 4 (LTBP-4)	Ltbp4	0.931661	1.90747	1.53709	1.92369	0.199085	0.0981096	1.00829	N	0.0985571	0.0629372	N	4	2.63326	0.0491856	0.551071	0.351833	-0.026918	-0.506164	-0.249815	-0.0188206	-1.6734	-1.88566
293597567	A6ZI44	Fructose-bisphosphate aldolase (EC 4.1.2.13)	Aldoa	0.930104	1.90541	3.92022	4.29198	0.0172445	0.00407866	2.38948	Y	0.0432996	0.0256173	Y	4	2.63326	0.0491856	0.0844373	0.0704431	0.149171	0.522491	0.608009	-0.304804	-0.885257	-0.320581
9256519	P47955	60S acidic ribosomal protein P1	Rplp1	0.928541	1.90335	1.59662	1.99343	0.185586	0.0887154	1.052	N	0.0953198	0.0596591	N	4	2.63326	0.0491856	0.507329	0.325456	-0.481706	0.918035	1.32008	-0.059846	-0.239863	-0.729506
568979640	A0A1Y7VJW9	Fibulin-5	Fbln5	0.923065	1.89614	1.40837	1.76971	0.231796	0.122444	0.912063	N	0.10806	0.0711569	N	4	2.63326	0.0491856	0.644353	0.408084	0.532515	0.456071	0.719443	0.930961	-0.815677	-1.17645
13195624	Q99LC3	NADH dehydrogenase [ubiquinone] 1 alpha subcomplex subunit 10, mitochondrial (Complex I-42kD) (CI-42kD) (NADH-ubiquinone oxidoreductase 42 kDa subunit)	Ndufa10	0.902541	1.86936	1.70637	2.11723	0.163132	0.0741911	1.12965	N	0.0884439	0.0543789	N	4	2.63326	0.0491856	0.41964	0.272578	-0.159701	0.936674	0.143046	-1.38979	-0.413283	0.0154678
568924091	Q30D77	Collagen alpha-1(XXIV) chain	Col24a1	0.89827	1.86383	1.94505	2.38688	0.123657	0.0503242	1.29822	N	0.0798277	0.0454499	Y	4	2.63326	0.0491856	0.31992	0.212444	3.05823	3.0181	2.83455	2.92429	1.93023	1.36155
33859809	Q8K0E8	Fibrinogen beta chain [Cleaved into: Fibrinopeptide B; Fibrinogen beta chain]	Fgb	0.896932	1.8621	1.48904	1.8629	0.210712	0.107093	0.970239	N	0.101705	0.0665427	N	4	2.63326	0.0491856	0.54425	0.34772	0.359581	-0.248335	1.39766	0.0486687	-0.116469	-1.11409
755499239	UPI0005AB9520	pyruvate dehydrogenase kinase, isozyme 1 isoform X1	Pdk1	0.883079	1.84431	2.56599	3.03901	0.0622423	0.020157	1.69557	Y	0.0585971	0.0318759	Y	4	2.63326	0.0491856	0.177656	0.126656	-0.420151	0.635357	0.107511	-1.00124	-0.859036	-0.466243
62526118	Q8BMK4	Cytoskeleton-associated protein 4 (63-kDa cytoskeleton-linking membrane protein) (Climp-63) (p63)	Ckap4	0.879803	1.84012	1.78744	2.20563	0.148392	0.0653064	1.18504	N	0.0859701	0.0512701	N	4	2.63326	0.0491856	0.36341	0.23867	0.228774	0.25809	0.314325	0.368721	-1.05365	-1.15329
13937395	Q99MR6	Serrate RNA effector molecule homolog (Arsenite-resistance protein 2)	Srrt	0.87278	1.83119	1.63203	2.02657	0.178009	0.0845697	1.07279	N	0.0931022	0.0581273	N	4	2.63326	0.0491856	0.428987	0.278214	-1.62859	-0.0328986	-0.0202899	-1.48883	-1.39286	-1.41843
30519911	Q9WVA4	Transgelin-2 (SM22-beta)	Tagln2	0.869389	1.82689	2.66385	3.12803	0.0561646	0.0178585	1.74815	Y	0.0556582	0.030564	Y	4	2.63326	0.0491856	0.159772	0.115871	-0.121369	0.639956	0.567616	-0.827454	-0.0901786	-0.604331
21313679	Q9DCX2	ATP synthase subunit d, mitochondrial (ATPase subunit d)	Atp5h	0.868863	1.82622	1.52573	1.90247	0.201774	0.101159	0.994996	N	0.0993964	0.064721	N	4	2.63326	0.0491856	0.486452	0.312867	-0.87944	0.982078	0.345563	-1.04104	-0.545508	-0.571839
406855425	Q8K3J1	NADH dehydrogenase [ubiquinone] iron-sulfur protein 8, mitochondrial (EC 1.6.5.3) (EC 1.6.99.3) (Complex I-23kD) (CI-23kD) (NADH-ubiquinone oxidoreductase 23 kDa subunit)	Ndufs8	0.868099	1.82526	1.94519	2.3793	0.123639	0.0508734	1.29351	N	0.0798277	0.045825	Y	4	2.63326	0.0491856	0.29875	0.199678	-0.307378	0.746589	0.150141	-1.26894	-0.597975	-0.148031
6680345	P70404	Isocitrate dehydrogenase [NAD] subunit gamma 1, mitochondrial (Isocitric dehydrogenase subunit gamma) (NAD(+)-specific ICDH subunit gamma)	Idh3g	0.861319	1.8167	1.61989	2.01068	0.18057	0.086533	1.06282	N	0.0935751	0.0587919	N	4	2.63326	0.0491856	0.424079	0.275255	-0.19656	1.38793	0.655077	-0.745376	-0.175443	0.183309
166851828	Q9D3D9	ATP synthase subunit delta, mitochondrial (F-ATPase delta subunit)	Atp5d	0.86003	1.81508	1.86022	2.283	0.136366	0.0584196	1.23344	N	0.08253	0.0485352	Y	4	2.63326	0.0491856	0.320621	0.212867	0.676025	1.82727	1.19429	-0.131932	0.281251	0.968175
31981600	Q9CQ75	NADH dehydrogenase [ubiquinone] 1 alpha subcomplex subunit 2 (Complex I-B8) (CI-B8) (NADH-ubiquinone oxidoreductase B8 subunit)	Ndufa2	0.859372	1.81425	1.67029	2.06825	0.170184	0.0796289	1.09893	N	0.0914074	0.0565617	N	4	2.63326	0.0491856	0.397073	0.258969	0.926079	1.91053	1.23414	-0.266379	0.558773	1.20024
568978872	UPI0000192850	latent-transforming growth factor beta-binding protein 2 isoform X1;	Ltbp2	0.854729	1.80842	1.45529	1.81803	0.219288	0.114236	0.942199	N	0.104529	0.0687185	N	4	2.63326	0.0491856	0.51743	0.331547	-0.295438	-1.22478	-1.05601	-0.884106	-1.60483	-2.65148
569008609	O09111	NADH dehydrogenase [ubiquinone] 1 beta subcomplex subunit 11, mitochondrial (Complex I-ESSS) (CI-ESSS) (NADH-ubiquinone oxidoreductase ESSS subunit) (Neuronal protein 15.6) (Np15.6) (p15.6)	Ndufb11	0.845456	1.79683	1.87217	2.29261	0.134494	0.0576173	1.23945	N	0.082427	0.0483379	Y	4	2.63326	0.0491856	0.305903	0.203992	0.110968	1.15413	0.578629	-0.810055	-0.236603	0.354017
255708423	P04247	Myoglobin	Mb	0.843071	1.79386	1.92839	2.35393	0.126049	0.052759	1.2777	N	0.0802181	0.0465436	Y	4	2.63326	0.0491856	0.286702	0.192413	1.2483	0.961286	0.914247	1.04728	-0.222844	-0.229816
694879456	P41216	Long-chain-fatty-acid--CoA ligase 1 (EC 6.2.1.3) (Long-chain acyl-CoA synthetase 1) (LACS 1)	Acsl1	0.840973	1.79126	1.49299	1.86036	0.20973	0.107486	0.968649	N	0.101552	0.0665427	N	4	2.63326	0.0491856	0.475929	0.306521	-0.773561	0.989506	0.456219	-1.02701	-0.502423	-0.321321
126032329	P10126	Elongation factor 1-alpha 1 (EF-1-alpha-1) (Elongation factor Tu) (EF-Tu) (Eukaryotic elongation factor 1 A-1) (eEF1A-1)	Eef1a1	0.840658	1.79087	2.5325	2.98219	0.0644929	0.0217881	1.66178	Y	0.0593987	0.0334338	Y	4	2.63326	0.0491856	0.165284	0.119195	-0.342354	0.342715	0.697894	-0.442087	-0.865022	-0.516609
6681095	P62897	Cytochrome c, somatic	Cycs	0.826742	1.77368	2.08665	2.51945	0.105228	0.0416432	1.38046	Y	0.0747664	0.0418225	Y	4	2.63326	0.0491856	0.235467	0.161518	-0.269825	0.925113	0.869826	-0.463791	-0.256543	-0.234779
31980744	Q9CPQ8	ATP synthase subunit g, mitochondrial (ATPase subunit g)	Atp5l	0.822338	1.76827	2.03347	2.46121	0.111771	0.0452479	1.3444	Y	0.0762077	0.0431247	Y	4	2.63326	0.0491856	0.245311	0.167453	0.289232	1.31241	0.717513	-0.546965	-0.00248858	0.401596
13386100	Q9CPP6	NADH dehydrogenase [ubiquinone] 1 alpha subcomplex subunit 5 (Complex I subunit B13) (Complex I-13kD-B) (CI-13kD-B) (NADH-ubiquinone oxidoreductase 13 kDa-B subunit)	Ndufa5	0.818701	1.76382	2.156	2.58934	0.0973245	0.0377084	1.42356	Y	0.0723353	0.0392824	Y	4	2.63326	0.0491856	0.216294	0.149956	-0.183508	0.704871	0.0591023	-1.12661	-0.556692	-0.192335
19526848	Q922Q1	Mitochondrial amidoxime reducing component 2 (mARC2) (EC 1.-.-.-) (Molybdenum cofactor sulfurase C-terminal domain-containing protein 2) (MOSC domain-containing protein 2) (Moco sulfurase C-terminal domain-containing protein 2)	Marc2	0.812909	1.75675	2.52414	2.95727	0.0650694	0.0225475	1.6469	Y	0.0593987	0.0335557	Y	4	2.63326	0.0491856	0.155578	0.113343	1.05711	2.08941	1.85097	0.850991	0.715916	0.991855
6753324	P80317	T-complex protein 1 subunit zeta (TCP-1-zeta) (CCT-zeta-1)	Cct6a	0.809896	1.75309	2.99066	3.38513	0.0403118	0.012667	1.89733	Y	0.0485152	0.0279209	Y	4	2.63326	0.0491856	0.110006	0.0858615	-0.454779	-0.0588992	0.168314	-0.780279	-1.32122	-0.673554
83715998	Q06185	ATP synthase subunit e, mitochondrial (ATPase subunit e)	Atp5i	0.805508	1.74776	1.62793	2.00966	0.178869	0.0866606	1.06218	N	0.0934081	0.0587919	N	4	2.63326	0.0491856	0.367247	0.240983	1.46416	2.64321	2.00313	0.703426	1.07445	1.9161
34538601	P00405	Cytochrome c oxidase subunit 2 (Cytochrome c oxidase polypeptide II)	Mtco2	0.805237	1.74743	1.72358	2.11732	0.159879	0.0741814	1.12971	N	0.0879635	0.0543789	N	4	2.63326	0.0491856	0.327397	0.216953	0.0334318	1.0279	0.542506	-0.926546	-0.233921	0.348594
58037109	Q9DCS9	NADH dehydrogenase [ubiquinone] 1 beta subcomplex subunit 10 (Complex I-PDSW) (CI-PDSW) (NADH-ubiquinone oxidoreductase PDSW subunit)	Ndufb10	0.802218	1.74378	2.0651	2.48739	0.107827	0.0435893	1.36062	Y	0.0748859	0.0426292	Y	4	2.63326	0.0491856	0.226356	0.156023	0.829329	1.60803	1.16866	-0.166973	0.439509	0.92683
124517704	P37889	Fibulin-2 (FIBL-2)	Fbln2	0.800011	1.74111	2.07404	2.49592	0.106741	0.0430621	1.36591	Y	0.0747982	0.0424055	Y	4	2.63326	0.0491856	0.223177	0.154106	-0.560083	-0.894255	-0.957942	-0.903033	-2.13369	-1.77559
229892205	Q148W8	Inactive dual specificity phosphatase 27	Dusp27	0.798765	1.73961	1.63372	2.01483	0.177655	0.0860155	1.06542	N	0.0930608	0.05865	N	4	2.63326	0.0491856	0.358568	0.23575	0.368713	0.552064	0.952142	0.740157	-0.60467	-0.658862
78214312	Q9CQQ7	ATP synthase F(0) complex subunit B1, mitochondrial (ATP synthase subunit b) (ATPase subunit b)	Atp5f1	0.791599	1.73099	2.62323	3.03722	0.0586005	0.0202063	1.69451	Y	0.0572294	0.0318759	Y	4	2.63326	0.0491856	0.136593	0.101894	0.40695	1.1046	0.892354	-0.33146	-0.0605409	0.421107
72004262	Q99LY9	NADH dehydrogenase [ubiquinone] iron-sulfur protein 5 (Complex I-15 kDa) (CI-15 kDa) (NADH-ubiquinone oxidoreductase 15 kDa subunit)	Ndufs5	0.785987	1.72427	1.52333	1.88668	0.202345	0.103487	0.985116	N	0.0995147	0.0657189	N	4	2.63326	0.0491856	0.399329	0.26033	-1.55579	-0.5169	-1.24525	-2.63241	-1.84283	-1.20066
31980648	P56480	ATP synthase subunit beta, mitochondrial (EC 3.6.3.14)	Atp5b	0.778217	1.71501	2.1925	2.60875	0.0934306	0.0366862	1.4355	Y	0.0709412	0.0387297	Y	4	2.63326	0.0491856	0.188978	0.133484	0.291911	1.31686	0.682598	-0.31696	-0.0674603	0.341138
21450277	Q8VDN2	Sodium/potassium-transporting ATPase subunit alpha-1 (Na(+)/K(+) ATPase alpha-1 subunit) (EC 3.6.3.9) (Sodium pump subunit alpha-1)	Atp1a1	0.778145	1.71492	3.09931	3.44469	0.0362454	0.011714	1.9313	Y	0.0463279	0.0273793	Y	4	2.63326	0.0491856	0.0945545	0.0765441	0.226787	0.355231	-0.0618424	-0.349508	-1.03998	-0.42477
90903233	O70325	Phospholipid hydroperoxide glutathione peroxidase, mitochondrial (PHGPx) (EC 1.11.1.12) (Glutathione peroxidase 4) (GPx-4) (GSHPx-4)	Gpx4	0.775623	1.71193	6.35463	5.22916	0.0031426	0.00143652	2.84269	Y	0.0432996	0.0256173	Y	4	2.63326	0.0491856	0.0223466	0.0330011	2.09519	2.36073	2.36093	1.64452	1.35363	1.49183
54873610	P70424	Receptor tyrosine-protein kinase erbB-2 (EC 2.7.10.1) (Proto-oncogene Neu) (Proto-oncogene c-ErbB-2) (p185erbB2) (CD antigen CD340)	Erbb2	0.775487	1.71177	2.04878	2.45954	0.109842	0.0453559	1.34337	Y	0.0758193	0.0431247	Y	4	2.63326	0.0491856	0.214906	0.149119	-0.218053	-0.409154	-0.511645	-0.437254	-1.65938	-1.36868
568931283	UPI0003D70C7F	trans-2-enoyl-CoA reductase, mitochondrial isoform X1	Mecr	0.768674	1.7037	1.59645	1.96633	0.185624	0.0922551	1.03501	N	0.0953198	0.0614359	N	4	2.63326	0.0491856	0.347748	0.229225	-0.188582	-0.0671746	0.082882	-0.0219151	-0.79062	-1.66636
13385322	Q9CR61	NADH dehydrogenase [ubiquinone] 1 beta subcomplex subunit 7 (Complex I-B18) (CI-B18) (NADH-ubiquinone oxidoreductase B18 subunit)	Ndufb7	0.757091	1.69008	1.50038	1.85509	0.207906	0.108304	0.965354	N	0.101385	0.0666756	N	4	2.63326	0.0491856	0.381929	0.249837	0.507596	1.10975	0.941439	-0.755587	0.169921	0.873178
226437665	G5E814	MCG5603 (NADH dehydrogenase [ubiquinone] 1 alpha subcomplex subunit 11)	Ndufa11	0.756032	1.68884	1.76848	2.15373	0.151708	0.0703828	1.15253	N	0.0865115	0.0534703	N	4	2.63326	0.0491856	0.274138	0.184837	-0.542067	0.504528	-0.290989	-1.3261	-0.936343	-0.334182
54607098	Q8K2B3	Succinate dehydrogenase [ubiquinone] flavoprotein subunit, mitochondrial (EC 1.3.5.1) (Flavoprotein subunit of complex II) (Fp)	Sdha	0.746403	1.6776	2.11556	2.51498	0.10185	0.0419092	1.37769	Y	0.0739155	0.0418225	Y	4	2.63326	0.0491856	0.186717	0.13212	-1.43534	-0.248504	-0.924618	-1.74398	-1.63373	-1.46996
229892316	Q91VD9	NADH-ubiquinone oxidoreductase 75 kDa subunit, mitochondrial (EC 1.6.5.3) (EC 1.6.99.3) (Complex I-75kD) (CI-75kD)	Ndufs1	0.73771	1.66753	1.75525	2.13372	0.154069	0.072446	1.13999	N	0.0870134	0.0543789	N	4	2.63326	0.0491856	0.264963	0.179304	-0.400312	0.586168	-0.040827	-1.2311	-0.664613	-0.172389
58037117	Q9DCT2	NADH dehydrogenase [ubiquinone] iron-sulfur protein 3, mitochondrial (EC 1.6.5.3) (EC 1.6.99.3) (Complex I-30kD) (CI-30kD) (NADH-ubiquinone oxidoreductase 30 kDa subunit)	Ndufs3	0.737303	1.66706	2.39706	2.78538	0.0745938	0.0286171	1.54337	Y	0.0638922	0.0345552	Y	4	2.63326	0.0491856	0.141914	0.105103	0.175167	0.952602	0.358747	-0.537135	-0.324957	0.136699
163644329	P08226	Apolipoprotein E (Apo-E)	Apoe	0.735415	1.66488	5.06005	4.58252	0.00718031	0.00291201	2.53581	Y	0.0432996	0.0256173	Y	4	2.63326	0.0491856	0.0316845	0.0386321	-0.0298114	-0.109544	0.207479	-0.496874	-0.785459	-0.855788
110625624	P11983	T-complex protein 1 subunit alpha (TCP-1-alpha) (CCT-alpha) (Tailless complex polypeptide 1A) (TCP-1-A) (Tailless complex polypeptide 1B) (TCP-1-B)	Tcp1	0.729772	1.65838	2.2677	2.65649	0.0859454	0.0342934	1.46479	Y	0.0682331	0.0376228	Y	4	2.63326	0.0491856	0.155344	0.113201	-0.397994	0.102322	0.34821	-0.382806	-1.16799	-0.585983
171543853	P14873	Microtubule-associated protein 1B (MAP-1B) (MAP1(X)) (MAP1.2) [Cleaved into: MAP1B heavy chain; MAP1 light chain LC1]	Map1b	0.729644	1.65823	2.19963	2.58991	0.0926909	0.0376781	1.42391	Y	0.0709131	0.0392824	Y	4	2.63326	0.0491856	0.165049	0.119054	0.0208716	-0.57096	-0.306261	-0.453021	-1.22358	-1.36868
37574048	Q8R1I1	Cytochrome b-c1 complex subunit 9 (Complex III subunit 9) (Complex III subunit X) (Cytochrome c1 non-heme 7 kDa protein) (Ubiquinol-cytochrome c reductase complex 7.2 kDa protein)	Uqcr10	0.72757	1.65585	1.61694	1.97938	0.181197	0.0905327	1.04319	N	0.0936141	0.060649	N	4	2.63326	0.0491856	0.303704	0.202666	-0.153217	0.896398	0.474695	-0.79707	-0.482498	0.314735
55742711	Q8BH64	EH domain-containing protein 2	Ehd2	0.727435	1.65569	2.13972	2.52934	0.0991185	0.0410611	1.38657	Y	0.0727404	0.0415824	Y	4	2.63326	0.0491856	0.173366	0.124069	-0.201234	0.47419	0.493066	-0.949835	-0.371499	-0.0949482
6679647	O08600	Endonuclease G, mitochondrial (Endo G) (EC 3.1.30.-)	Endog	0.726223	1.6543	2.98564	3.291	0.0405125	0.0143489	1.84318	Y	0.0485152	0.0285171	Y	4	2.63326	0.0491856	0.0887479	0.0730425	-0.694844	-0.326873	-0.259851	-0.814198	-1.51366	-1.13238
18250284	Q9D6R2	Isocitrate dehydrogenase [NAD] subunit alpha, mitochondrial (EC 1.1.1.41) (Isocitric dehydrogenase subunit alpha) (NAD(+)-specific ICDH subunit alpha)	Idh3a	0.726089	1.65415	1.97193	2.35854	0.119904	0.0524106	1.28058	N	0.0784505	0.0463558	Y	4	2.63326	0.0491856	0.20337	0.142162	-1.30773	-0.182187	-0.694245	-1.57788	-1.671	-1.11355
31982522	Q07417	Short-chain specific acyl-CoA dehydrogenase, mitochondrial (SCAD) (EC 1.3.8.1) (Butyryl-CoA dehydrogenase)	Acads	0.721925	1.64938	2.47728	2.84858	0.06841	0.0262049	1.58162	Y	0.0608215	0.0343762	Y	4	2.63326	0.0491856	0.127386	0.0963424	-0.420025	0.328995	0.170082	-0.340484	-0.939861	-0.806377
21539599	P99028	Cytochrome b-c1 complex subunit 6, mitochondrial (Complex III subunit 6) (Complex III subunit VIII) (Cytochrome c1 non-heme 11 kDa protein) (Mitochondrial hinge protein) (Ubiquinol-cytochrome c reductase complex 11 kDa protein)	Uqcrh	0.719519	1.64663	1.87556	2.2555	0.133967	0.0607777	1.21626	N	0.082427	0.0498122	Y	4	2.63326	0.0491856	0.220758	0.152647	-0.985923	0.0517984	-0.491298	-1.48039	-1.38477	-0.718821
7949037	O35459	Delta(3,5)-Delta(2,4)-dienoyl-CoA isomerase, mitochondrial (EC 5.3.3.-)	Ech1	0.710966	1.6369	1.51981	1.86722	0.203189	0.10643	0.972937	N	0.0995147	0.0664378	N	4	2.63326	0.0491856	0.328254	0.21747	-0.744663	0.371436	0.0701147	-1.44694	-0.638617	-0.350452
6755997	P56695	Wolframin	Wfs1	0.705208	1.63038	3.09217	3.34746	0.0364973	0.013313	1.87572	Y	0.0463279	0.0282565	Y	4	2.63326	0.0491856	0.0780188	0.0665727	0.493299	0.503772	0.500153	0.248223	-0.398971	-0.467653
6755210	Q9WVJ2	26S proteasome non-ATPase regulatory subunit 13 (26S proteasome regulatory subunit RPN9) (26S proteasome regulatory subunit S11) (26S proteasome regulatory subunit p40.5)	Psmd13	0.705076	1.63023	2.05643	2.4341	0.108893	0.0470347	1.32758	Y	0.0753179	0.0441083	Y	4	2.63326	0.0491856	0.176335	0.125859	0.168933	0.235275	0.089498	0.114723	-0.708916	-1.02733
148747410	Q5XJY5	Coatomer subunit delta (Archain) (Delta-coat protein) (Delta-COP)	Arcn1	0.684201	1.60681	2.68558	2.99589	0.0549095	0.0213823	1.66994	Y	0.0555515	0.0331176	Y	4	2.63326	0.0491856	0.0973604	0.0782361	-0.102367	0.624642	0.662184	-0.206957	-0.392861	-0.268325
23346461	Q91WD5	NADH dehydrogenase [ubiquinone] iron-sulfur protein 2, mitochondrial (EC 1.6.5.3) (EC 1.6.99.3) (Complex I-49kD) (CI-49kD) (NADH-ubiquinone oxidoreductase 49 kDa subunit)	Ndufs2	0.684011	1.6066	2.73233	3.03455	0.0523173	0.02028	1.69293	Y	0.0541287	0.0318759	Y	4	2.63326	0.0491856	0.0940052	0.0762128	0.230759	0.606233	0.18904	-0.170405	-0.764148	-0.0914474
568972243	Q3TYK4	Uncharacterized protein	Prkar1a	0.681941	1.6043	3.38091	3.51915	0.0277621	0.0106305	1.97345	Y	0.0435604	0.0273085	Y	4	2.63326	0.0491856	0.0610264	0.0563259	-0.446322	-0.224469	-0.273346	-0.618229	-1.21844	-1.15329
164565411	O88207	Collagen alpha-1(V) chain	Col5a1	0.679391	1.60146	1.52019	1.85971	0.203098	0.107586	0.968244	N	0.0995147	0.0665427	N	4	2.63326	0.0491856	0.299596	0.200188	0.0225871	-0.28063	-0.474294	-0.141319	-1.03601	-1.59318
20070412	Q9DB20	ATP synthase subunit O, mitochondrial (Oligomycin sensitivity conferral protein) (OSCP)	Atp5o	0.677554	1.59943	1.92473	2.28736	0.12658	0.0580543	1.23617	N	0.0802181	0.0484209	Y	4	2.63326	0.0491856	0.185882	0.131617	0.447616	1.54283	0.873495	0.111059	0.144989	0.57523
67514549	P29416	Beta-hexosaminidase subunit alpha (EC 3.2.1.52) (Beta-N-acetylhexosaminidase subunit alpha) (Hexosaminidase subunit A) (N-acetyl-beta-glucosaminidase subunit alpha)	Hexa	0.676213	1.59794	2.47916	2.81073	0.0682722	0.0276225	1.55874	Y	0.0608215	0.0343866	Y	4	2.63326	0.0491856	0.111596	0.0868203	-1.64153	-1.44478	-1.16027	-1.80021	-1.91985	-2.55516
568998745	UPI0003D6EE97	complement C4-B isoform X1	C4b	0.67594	1.59764	1.86653	2.22731	0.135373	0.0632968	1.19862	N	0.08253	0.0502187	N	4	2.63326	0.0491856	0.196714	0.138148	-1.36615	-0.93353	-0.41574	-1.1674	-1.59131	-1.98453
357588496	Q9DC77	Small muscular protein (Stretch-responsive skeletal muscle protein) (Chisel protein)	Smpx	0.671454	1.59268	3.88381	3.81108	0.0177837	0.00732461	2.13522	Y	0.0432996	0.0256173	Y	4	2.63326	0.0491856	0.0448342	0.0465616	-0.764292	-0.329952	-0.824803	-1.1634	-1.36418	-1.40583
755493895	UPI00001EDA05	septin-2 isoform X1	,Sept2	0.66964	1.59068	3.19333	3.36786	0.0331107	0.0129588	1.88744	Y	0.0455507	0.0280739	Y	4	2.63326	0.0491856	0.0659608	0.0593014	-0.775871	-0.207938	-0.391587	-0.875446	-1.26168	-1.24719
83816956	P43023	Cytochrome c oxidase subunit 6A2, mitochondrial (Cytochrome c oxidase polypeptide VIa-heart) (COXVIAH)	Cox6a2	0.667593	1.58842	1.41299	1.73752	0.230532	0.128226	0.892022	N	0.107832	0.0732734	N	4	2.63326	0.0491856	0.334839	0.221441	-0.40536	0.353194	-0.169375	-1.54609	-0.521834	-0.156397
6679439	P17742	Peptidyl-prolyl cis-trans isomerase A (PPIase A) (EC 5.2.1.8) (Cyclophilin A) (Cyclosporin A-binding protein) (Rotamase A) (SP18) [Cleaved into: Peptidyl-prolyl cis-trans isomerase A, N-terminally processed]	Ppia	0.666589	1.58732	1.81741	2.17256	0.143307	0.0684963	1.16433	N	0.084267	0.0529247	N	4	2.63326	0.0491856	0.20179	0.141209	0.330656	1.113	1.13638	-0.148026	0.0388189	0.689477
10181184	P56135	ATP synthase subunit f, mitochondrial	Atp5j2	0.666023	1.58669	1.91325	2.26991	0.128264	0.0595303	1.22526	N	0.080801	0.0491004	Y	4	2.63326	0.0491856	0.181771	0.129138	-1.88373	-0.938222	-1.39494	-2.48633	-1.96916	-1.75947
755498697	UPI0005ABA05B	fibrillin-1 isoform X1	Fbn1	0.662491	1.58281	1.53846	1.87502	0.198764	0.10524	0.97782	N	0.0985571	0.066218	N	4	2.63326	0.0491856	0.278151	0.187257	0.835743	0.127236	0.0997312	0.394704	-0.551963	-0.767503
568951392	Q9CR21	Acyl carrier protein, mitochondrial (ACP) (CI-SDAP) (NADH-ubiquinone oxidoreductase 9.6 kDa subunit)	Ndufab1	0.660037	1.58012	2.02247	2.37487	0.113179	0.0511975	1.29075	N	0.0764111	0.0458755	Y	4	2.63326	0.0491856	0.159759	0.115864	-0.32476	0.696772	0.0539951	-0.755869	-0.501113	-0.297122
29789289	Q8BH95	Enoyl-CoA hydratase, mitochondrial (EC 4.2.1.17) (Enoyl-CoA hydratase 1) (Short-chain enoyl-CoA hydratase) (SCEH)	Echs1	0.652568	1.57196	1.61748	1.95718	0.181083	0.0934818	1.02927	N	0.0936141	0.0618873	N	4	2.63326	0.0491856	0.244155	0.166756	-0.372163	0.723753	0.442861	-0.767954	-0.433999	0.0387001
254281222	Q9JIY5	Serine protease HTRA2, mitochondrial (EC 3.4.21.108) (High temperature requirement protein A2) (HtrA2) (Omi stress-regulated endoprotease) (Serine protease 25) (Serine proteinase OMI)	Htra2	0.64871	1.56777	1.94738	2.29449	0.123328	0.0574621	1.24062	N	0.0798277	0.0483379	Y	4	2.63326	0.0491856	0.166453	0.119901	-1.95004	-1.15287	-1.1911	-1.8613	-1.88142	-2.49742
568991653	UPI0000161C69	Poly(RC)-binding protein 2	Pcbp2	0.647384	1.56633	5.01158	4.26136	0.00742935	0.00422921	2.37374	Y	0.0432996	0.0256173	Y	4	2.63326	0.0491856	0.0250303	0.0346194	0.650993	1.03809	0.803871	0.181094	0.294596	0.0751107
485836844	Q61739	Integrin alpha-6 (CD49 antigen-like family member F) (VLA-6) (CD antigen CD49f) [Cleaved into: Integrin alpha-6 heavy chain; Integrin alpha-6 light chain]	Itga6	0.643393	1.562	4.69369	4.12332	0.0093521	0.00498848	2.30203	Y	0.0432996	0.0256173	Y	4	2.63326	0.0491856	0.0281849	0.0365217	-2.42161	-1.96577	-2.08087	-2.81427	-2.79599	-2.78817
29126205	Q8BWT1	3-ketoacyl-CoA thiolase, mitochondrial (EC 2.3.1.16) (Acetyl-CoA acyltransferase) (Beta-ketothiolase) (Mitochondrial 3-oxoacyl-CoA thiolase)	Acaa2	0.641354	1.55979	1.29144	1.59474	0.266123	0.157158	0.803663	N	0.119146	0.0832891	N	4	2.63326	0.0491856	0.369944	0.24261	-0.614267	0.760409	0.432922	-0.978261	-0.300294	-0.0664434
13385090	P56391	Cytochrome c oxidase subunit 6B1 (Cytochrome c oxidase subunit VIb isoform 1) (COX VIb-1)	Cox6b1	0.639768	1.55808	1.77614	2.11784	0.150359	0.0741261	1.13003	N	0.0863713	0.0543789	N	4	2.63326	0.0491856	0.194617	0.136884	0.10408	0.626892	0.278701	-0.856169	-0.325171	0.27171
6680748	Q03265	ATP synthase subunit alpha, mitochondrial	Atp5a1	0.639002	1.55725	1.55957	1.89047	0.193874	0.102923	0.987489	N	0.0980702	0.0654823	N	4	2.63326	0.0491856	0.251818	0.171378	0.262144	1.27136	0.689571	-0.413328	0.140993	0.578404
568982546	UPI0003D713C5	adenylyl cyclase-associated protein 2 isoform X1	Cap2	0.634975	1.55291	2.7287	2.97123	0.0525131	0.0221185	1.65524	Y	0.0541287	0.0335256	Y	4	2.63326	0.0491856	0.0812254	0.0685063	-0.298765	0.0499816	0.0593883	-0.300409	-0.943472	-0.850439
568923347	UPI0003D70FEE	PDZ and LIM domain protein 5 isoform X7	Pdlim5	0.632042	1.54976	1.14567	1.42566	0.315814	0.199283	0.700529	N	0.13346	0.096376	N	4	2.63326	0.0491856	0.456521	0.294818	0.391682	-0.344194	-0.484523	0.18062	-1.20455	-1.30923
6678321	P82198	Transforming growth factor-beta-induced protein ig-h3 (Beta ig-h3)	Tgfbi	0.631282	1.54894	1.51097	1.83557	0.205321	0.11139	0.953156	N	0.100269	0.0678427	N	4	2.63326	0.0491856	0.261833	0.177417	0.172072	0.47564	0.556305	0.571165	-0.594639	-0.666356
6806903	O55143	Sarcoplasmic/endoplasmic reticulum calcium ATPase 2 (SERCA2) (SR Ca(2+)-ATPase 2) (EC 3.6.3.8) (Calcium pump 2) (Calcium-transporting ATPase sarcoplasmic reticulum type, slow twitch skeletal muscle isoform) (Endoplasmic reticulum class 1/2 Ca(2+) ATPase)	Atp2a2	0.629514	1.54704	1.49538	1.81814	0.209138	0.114218	0.942264	N	0.101552	0.0687185	N	4	2.63326	0.0491856	0.265826	0.179825	-0.0936502	1.17852	0.836278	-0.308109	0.0221769	0.318537
160333193	Q9WUR2	Enoyl-CoA delta isomerase 2, mitochondrial (EC 5.3.3.8) (Delta(3),delta(2)-enoyl-CoA isomerase) (D3,D2-enoyl-CoA isomerase) (Dodecenoyl-CoA isomerase) (Peroxisomal 3,2-trans-enoyl-CoA isomerase) (pECI)	Eci2	0.626867	1.54421	1.49364	1.81541	0.209569	0.114666	0.940565	N	0.101552	0.0687185	N	4	2.63326	0.0491856	0.264211	0.178851	1.01566	2.0827	1.68706	0.542962	0.861906	1.49995
114145493	Q7TMK9	Heterogeneous nuclear ribonucleoprotein Q (hnRNP Q) (Glycine- and tyrosine-rich RNA-binding protein) (GRY-RBP) (NS1-associated protein 1) (Synaptotagmin-binding, cytoplasmic RNA-interacting protein) (pp68)	Syncrip	0.623434	1.54054	4.93006	4.14153	0.0078725	0.0048802	2.31156	Y	0.0432996	0.0256173	Y	4	2.63326	0.0491856	0.0239865	0.03399	0.720429	0.990742	0.880215	0.438092	0.154932	0.12806
21312752	Q9D6S7	Ribosome-recycling factor, mitochondrial (RRF) (Ribosome-releasing factor, mitochondrial)	Mrrf	0.623038	1.54012	1.75455	2.08778	0.154194	0.0774136	1.11118	N	0.0870134	0.055668	N	4	2.63326	0.0491856	0.189142	0.133583	-0.274067	0.78526	0.789406	-0.137902	-0.242869	-0.187745
13385006	Q9D0M3	Cytochrome c1, heme protein, mitochondrial (Complex III subunit 4) (Complex III subunit IV) (Cytochrome b-c1 complex subunit 4) (Ubiquinol-cytochrome-c reductase complex cytochrome c1 subunit) (Cytochrome c-1)	Cyc1	0.618336	1.5351	3.16706	3.25876	0.0339533	0.0149791	1.82451	Y	0.0455507	0.0289057	Y	4	2.63326	0.0491856	0.0571777	0.054005	-0.23462	0.38596	0.0715667	-0.53822	-0.68127	-0.41261
7106303	Q9WVK4	EH domain-containing protein 1 (PAST homolog 1) (mPAST1)	Ehd1	0.613021	1.52946	2.07395	2.39158	0.106751	0.0499858	1.30115	Y	0.0747982	0.0453838	Y	4	2.63326	0.0491856	0.131052	0.0985531	-0.066707	-0.655593	-0.356564	-0.719473	-1.45606	-0.742393
27734196	Q66K08	Cartilage intermediate layer protein 1 (CILP-1) [Cleaved into: Cartilage intermediate layer protein 1 C1; Cartilage intermediate layer protein 1 C2]	Cilp	0.612972	1.52941	0.62493	0.795878	0.565898	0.453637	0.343292	N	0.202099	0.174083	N	4	2.63326	0.0491856	1.44315	0.889774	1.1259	0.396805	-1.62473	0.391991	-0.951983	-1.38095
70608166	Q8BZF8	Phosphoglucomutase-like protein 5	Pgm5	0.602329	1.51817	1.89721	2.21723	0.130659	0.0642233	1.19231	N	0.0814085	0.0505357	N	4	2.63326	0.0491856	0.151192	0.110697	0.522427	0.440832	0.21053	0.38655	-0.601318	-0.418429
158937312	P14602	Heat shock protein beta-1 (HspB1) (Growth-related 25 kDa protein) (Heat shock 25 kDa protein) (HSP 25) (Heat shock 27 kDa protein) (HSP 27) (p25)	Hspb1	0.599333	1.51502	1.21632	1.50102	0.290728	0.179369	0.746253	N	0.126324	0.0897607	N	4	2.63326	0.0491856	0.364195	0.239143	0.931511	-0.0167006	-0.0307138	0.437434	-0.78147	-0.569867
13385492	Q9CQZ5	NADH dehydrogenase [ubiquinone] 1 alpha subcomplex subunit 6 (Complex I-B14) (CI-B14) (NADH-ubiquinone oxidoreductase B14 subunit)	Ndufa6	0.59117	1.50647	1.33833	1.63536	0.251797	0.148353	0.828703	N	0.114394	0.0802212	N	4	2.63326	0.0491856	0.292676	0.196015	0.104254	1.11033	0.378914	-0.595453	-0.108331	0.523773
83921612	Q91W90	Thioredoxin domain-containing protein 5 (Endoplasmic reticulum resident protein 46) (ER protein 46) (ERp46) (Plasma cell-specific thioredoxin-related protein) (PC-TRP) (Thioredoxin-like protein p46)	Txndc5	0.589115	1.50432	1.13651	1.40807	0.319213	0.204209	0.689925	N	0.134234	0.0981727	N	4	2.63326	0.0491856	0.40304	0.262567	-0.219407	-0.369009	-0.242493	0.166087	-1.35851	-1.40583
75677414	Q60598	Src substrate cortactin	Cttn	0.583366	1.49834	2.16072	2.44403	0.0968112	0.0463723	1.33374	Y	0.0722708	0.0437268	Y	4	2.63326	0.0491856	0.10934	0.0854598	0.337745	0.210135	0.31793	0.220623	-0.431022	-0.67389
569002183	UPI0003D72205	tenascin-X isoform X1;tenascin-X isoform X5	Tnxb	0.581258	1.49615	1.35758	1.65359	0.246136	0.144555	0.839967	N	0.112577	0.0787896	N	4	2.63326	0.0491856	0.274977	0.185343	0.131223	0.0931549	0.265696	0.431501	-0.817587	-0.867615
19527144	Q8VEA4	Mitochondrial intermembrane space import and assembly protein 40 (Coiled-coil-helix-coiled-coil-helix domain-containing protein 4)	Chchd4	0.577678	1.49245	4.60215	3.84961	0.0100147	0.00697991	2.15615	Y	0.0432996	0.0256173	Y	4	2.63326	0.0491856	0.0236343	0.0337776	-0.41651	-0.262207	-0.339944	-1.12598	-0.905779	-0.719937
58037481	Q8BRF7	Sec1 family domain-containing protein 1 (Syntaxin-binding protein 1-like 2)	Scfd1	0.572581	1.48718	2.58132	2.77132	0.061242	0.0291849	1.53484	Y	0.0579775	0.0345552	Y	4	2.63326	0.0491856	0.0738041	0.0640311	0.345359	0.655196	0.667605	0.3633	-0.284377	-0.128505
111038118	Q61425	Hydroxyacyl-coenzyme A dehydrogenase, mitochondrial (HCDH) (EC 1.1.1.35) (Medium and short-chain L-3-hydroxyacyl-coenzyme A dehydrogenase) (Short-chain 3-hydroxyacyl-CoA dehydrogenase)	Hadh	0.571528	1.4861	1.15997	1.43147	0.310581	0.197679	0.704039	N	0.131741	0.0959769	N	4	2.63326	0.0491856	0.364146	0.239113	-1.48411	-0.00220044	-0.459065	-1.65739	-1.09554	-0.90703
6671702	P80316	T-complex protein 1 subunit epsilon (TCP-1-epsilon) (CCT-epsilon)	Cct5	0.568916	1.48341	2.05755	2.33981	0.108754	0.0538389	1.2689	N	0.0753179	0.0469659	Y	4	2.63326	0.0491856	0.11468	0.08868	-0.4026	0.0499816	0.334929	-0.324749	-0.909919	-0.489768
83776559	Q3UIZ8	Myosin light chain kinase 3 (EC 2.7.11.18) (Cardiac-MyBP-C-associated Ca/CaM kinase) (Cardiac-MLCK)	Mylk3	0.56748	1.48193	1.62066	1.92447	0.180407	0.0979997	1.00878	N	0.0935751	0.0629372	N	4	2.63326	0.0491856	0.183911	0.130428	-0.747051	-1.00609	-1.33867	-1.01084	-1.74601	-2.0374
21312950	Q9DC70	NADH dehydrogenase [ubiquinone] iron-sulfur protein 7, mitochondrial (EC 1.6.5.3) (EC 1.6.99.3) (Complex I-20kD) (CI-20kD) (NADH-ubiquinone oxidoreductase 20 kDa subunit)	Ndufs7	0.565651	1.48006	1.77784	2.07851	0.150061	0.0784568	1.10537	N	0.0863468	0.0561821	N	4	2.63326	0.0491856	0.151845	0.111092	0.337754	1.06771	0.584187	-0.290517	0.0617356	0.52148
160358825	Q01339	Beta-2-glycoprotein 1 (APC inhibitor) (Activated protein C-binding protein) (Apolipoprotein H) (Apo-H) (Beta-2-glycoprotein I) (B2GPI) (Beta(2)GPI)	Apoh	0.563616	1.47797	3.54235	3.35137	0.0239627	0.0132443	1.87797	Y	0.0433834	0.0282565	Y	4	2.63326	0.0491856	0.0379729	0.0424241	0.779238	1.16983	1.275	0.587858	0.415322	0.530041
1039741625	UPI0003D73398	histone-lysine N-methyltransferase setd3 isoform X1	Setd3	0.554278	1.46843	1.70946	2.00512	0.162544	0.0872303	1.05933	N	0.0884439	0.0587919	N	4	2.63326	0.0491856	0.157699	0.114622	0.609639	0.292004	0.488956	0.530391	-0.383073	-0.419554
21489953	P84228	Histone H3.2	Hist1h3b; Hist1h3c; Hist1h3d; Hist1h3e; Hist1h3f; Hist2h3b; Hist2h3c1; Hist2h3c2	0.54919	1.46326	0.652389	0.827607	0.549743	0.43665	0.359866	N	0.197269	0.170036	N	4	2.63326	0.0491856	1.06298	0.660524	-1.63219	-1.52084	-1.54727	-1.15148	-1.4045	-3.79189
1039751015	E9PVZ8	Golgi autoantigen, golgin subfamily b, macrogolgin 1	Golgb1	0.547765	1.46182	2.47196	2.65308	0.0688021	0.0344584	1.4627	Y	0.060883	0.0376831	Y	4	2.63326	0.0491856	0.0736542	0.0639407	-0.386878	-0.674755	-0.509864	-0.661391	-1.26114	-1.29226
31982028	Q9D031	Ras suppressor protein 1 (Ras suppressor protein 1, isoform CRA_b)	Rsu1	0.547339	1.46139	2.72527	2.83248	0.0526992	0.0267984	1.57189	Y	0.0541287	0.0343866	Y	4	2.63326	0.0491856	0.0605039	0.0560108	0.36691	1.0309	0.785764	0.233562	0.0754977	0.232497
568949721	UPI0000479FD7	integrin-linked protein kinase isoform X1	Ilk	0.544533	1.45855	3.76788	3.40255	0.0196404	0.0123798	1.90728	Y	0.0432996	0.0276961	Y	4	2.63326	0.0491856	0.0313289	0.0384176	0.840449	1.24642	1.05322	0.665994	0.384299	0.456197
9506983	P63330	Serine/threonine-protein phosphatase 2A catalytic subunit alpha isoform (PP2A-alpha) (EC 3.1.3.16)	Ppp2ca	0.544405	1.45842	1.26053	1.53676	0.275998	0.170576	0.768083	N	0.122305	0.0872743	N	4	2.63326	0.0491856	0.27979	0.188245	0.617203	0.619378	0.502014	0.864805	-0.576682	-0.182743
167555029	E9PV24	Fibrinogen alpha chain [Cleaved into: Fibrinopeptide A; Fibrinogen alpha chain]	Fga	0.540121	1.45409	1.09504	1.35146	0.33501	0.220819	0.655964	N	0.139009	0.104202	N	4	2.63326	0.0491856	0.364933	0.239588	0.830518	0.0416664	1.36921	0.389953	0.624417	-0.393338
21312012	Q9DCJ5	NADH dehydrogenase [ubiquinone] 1 alpha subcomplex subunit 8 (Complex I-19kD) (CI-19kD) (Complex I-PGIV) (CI-PGIV) (NADH-ubiquinone oxidoreductase 19 kDa subunit)	Ndufa8	0.537881	1.45184	1.42558	1.71067	0.227128	0.133247	0.875343	N	0.106913	0.075004	N	4	2.63326	0.0491856	0.213541	0.148296	0.292539	1.13235	0.526381	-0.362204	0.0849942	0.614838
339895748	J3QQ16	Collagen, type VI, alpha 3	Col6a3	0.534874	1.44882	1.25806	1.53123	0.276799	0.17191	0.764698	N	0.12247	0.0876893	N	4	2.63326	0.0491856	0.271136	0.183027	0.815391	0.734833	0.608	1.0063	-0.0686543	-0.384043
568965099	UPI0001DD3632	Protein-L-isoaspartate O-methyltransferase	Pcmt1	0.533432	1.44737	3.97794	3.45332	0.0164294	0.0115824	1.9362	Y	0.0432996	0.0273793	Y	4	2.63326	0.0491856	0.0269733	0.0357911	-0.170789	0.145446	0.131421	-0.356883	-0.652773	-0.484563
255308899	P27659	60S ribosomal protein L3 (J1 protein)	Rpl3	0.531808	1.44574	1.55313	1.838	0.195351	0.111002	0.954669	N	0.0985236	0.0678335	N	4	2.63326	0.0491856	0.175867	0.125577	0.717849	0.35449	0.629604	0.684066	-0.307336	-0.27021
163838641	Q91VR2	ATP synthase subunit gamma, mitochondrial (F-ATPase gamma subunit)	Atp5c1	0.531281	1.44521	1.84882	2.11982	0.138179	0.0739138	1.13127	N	0.082905	0.0543789	N	4	2.63326	0.0491856	0.123866	0.0942196	-0.0812877	0.814401	0.371811	-0.134757	-0.392861	0.0387001
124486955	E9PYH0	Versican core protein	Vcan	0.529141	1.44307	2.10678	2.34177	0.102864	0.0536877	1.27013	N	0.0739819	0.0469659	Y	4	2.63326	0.0491856	0.0946229	0.0765853	-0.388574	-0.972063	-0.997201	-1.00915	-1.44657	-1.48954
282398108	Q91YQ5	Dolichyl-diphosphooligosaccharide--protein glycosyltransferase subunit 1 (Dolichyl-diphosphooligosaccharide--protein glycosyltransferase 67 kDa subunit) (Ribophorin I) (RPN-I) (Ribophorin-1)	Rpn1	0.528144	1.44207	2.41917	2.58453	0.0728283	0.0379666	1.4206	Y	0.0626554	0.0392824	Y	4	2.63326	0.0491856	0.0714928	0.0626373	-0.668714	-0.0761955	-0.0317127	-0.648631	-0.809831	-0.902591
110625935	Q9D783	Kelch-like protein 40 (Kelch repeat and BTB domain-containing protein 5)	Klhl40	0.52795	1.44188	1.4377	1.71893	0.223896	0.131684	0.880467	N	0.105833	0.0748321	N	4	2.63326	0.0491856	0.202275	0.141502	-1.23889	-1.52188	-1.61674	-1.34387	-2.07299	-2.5445
59797056	P05125	Natriuretic peptides A (Prepronatriodilatin) [Cleaved into: Atrial natriuretic factor (ANF) (Atrial natriuretic peptide) (ANP); Auriculin-B; Auriculin-A; Atriopeptin-1 (Atriopeptin I); Atriopeptin-2 (Atriopeptin II)]	Nppa	0.52773	1.44166	2.20341	2.41863	0.0923015	0.048087	1.31797	Y	0.0709128	0.0447276	Y	4	2.63326	0.0491856	0.086045	0.0714127	-0.68172	-0.663098	-0.438365	-0.669734	-1.36418	-1.33246
568913585	UPI0003D74B03	gelsolin isoform X1	Gsn	0.525277	1.43921	1.37114	1.64861	0.242224	0.145583	0.83689	N	0.111088	0.0790978	N	4	2.63326	0.0491856	0.220143	0.152276	-0.974548	-1.23742	-1.44599	-1.03555	-2.01301	-2.18523
6680836	P14211	Calreticulin (CRP55) (Calregulin) (Endoplasmic reticulum resident protein 60) (ERp60) (HACBP)	Calr	0.525154	1.43909	1.20272	1.46794	0.295405	0.187874	0.726132	N	0.127215	0.0926118	N	4	2.63326	0.0491856	0.285977	0.191976	-1.34333	-0.506029	-0.705293	-2.02333	-1.31233	-0.794453
7305143	O08528	Hexokinase-2 (EC 2.7.1.1) (Hexokinase type II) (HK II)	Hk2	0.52349	1.43743	1.3564	1.63243	0.24648	0.148973	0.826892	N	0.112583	0.0804292	N	4	2.63326	0.0491856	0.223425	0.154256	-2.39206	-1.32079	-2.09147	-2.84817	-2.09745	-2.42917
9790141	Q9JM76	Actin-related protein 2/3 complex subunit 3 (Arp2/3 complex 21 kDa subunit) (p21-ARC)	Arpc3	0.520743	1.43469	2.75442	2.80072	0.0511415	0.0280106	1.55268	Y	0.0541287	0.0343866	Y	4	2.63326	0.0491856	0.0536138	0.0518559	0.843428	1.19182	1.35735	0.815246	0.590359	0.424763
70778974	Q3TCU5	Tapasin	Tapbp	0.511303	1.42534	0.650272	0.823144	0.550977	0.439012	0.357524	N	0.197395	0.170761	N	4	2.63326	0.0491856	0.927381	0.578757	-2.39826	-0.556399	-0.227996	-2.22853	-1.6481	-0.839934
755519997	UPI0005ABA57B	mitochondrial import inner membrane translocase subunit TIM50 isoform X1	Timm50	0.508725	1.42279	4.5632	3.55206	0.0103138	0.0101869	1.99196	Y	0.0432996	0.0268221	Y	4	2.63326	0.0491856	0.0186432	0.0307679	-1.10612	-0.882904	-1.2201	-1.62234	-1.47635	-1.63661
326537320	Q8C0E3	Tripartite motif-containing protein 47	Trim47	0.492202	1.40659	1.33242	1.59436	0.25356	0.157243	0.803429	N	0.114888	0.0832891	N	4	2.63326	0.0491856	0.204689	0.142957	-0.115256	-0.798113	-0.563935	-0.368481	-1.22765	-1.35778
27754144	Q9CQH3	NADH dehydrogenase [ubiquinone] 1 beta subcomplex subunit 5, mitochondrial (Complex I-SGDH) (CI-SGDH) (NADH-ubiquinone oxidoreductase SGDH subunit)	Ndufb5	0.486624	1.40116	1.23555	1.49074	0.284231	0.181973	0.739993	N	0.124942	0.0906662	N	4	2.63326	0.0491856	0.232679	0.159836	0.105498	1.21754	0.473079	-0.301506	0.192102	0.445649
568964817	UPI0000353E62	band 4.1-like protein 2 isoform X1	Epb41l2	0.481806	1.39649	2.86315	2.7774	0.0457837	0.0289381	1.53853	Y	0.051551	0.0345552	Y	4	2.63326	0.0491856	0.0424763	0.0451398	-0.579077	-0.386536	-0.492579	-0.654229	-1.16799	-1.08139
254692859	Q9DC69	NADH dehydrogenase [ubiquinone] 1 alpha subcomplex subunit 9, mitochondrial (Complex I-39kD) (CI-39kD) (NADH-ubiquinone oxidoreductase 39 kDa subunit)	Ndufa9	0.481526	1.39622	1.78414	2.01791	0.148963	0.0856334	1.06736	N	0.0860532	0.058506	N	4	2.63326	0.0491856	0.109262	0.0854132	-1.474	-0.950293	-1.29751	-2.0578	-1.80533	-1.30325
6679573	P42669	Transcriptional activator protein Pur-alpha (Purine-rich single-stranded DNA-binding protein alpha)	Pura	0.480894	1.39561	4.31511	3.35818	0.0124955	0.0131256	1.88188	Y	0.0432996	0.0282565	Y	4	2.63326	0.0491856	0.0186297	0.0307597	-0.677992	-0.448777	-0.624218	-0.923239	-1.22417	-1.04626
114205428	Q8BP92	Reticulocalbin-2 (Taipoxin-associated calcium-binding protein 49) (TCBP-49)	Rcn2	0.48071	1.39543	2.27653	2.40642	0.0851115	0.048935	1.31038	Y	0.0681932	0.0451482	Y	4	2.63326	0.0491856	0.066882	0.0598569	-1.32768	-1.01792	-1.33994	-1.35064	-1.95198	-1.82505
167234372	Q8BGD9	Eukaryotic translation initiation factor 4B (eIF-4B)	Eif4b	0.470181	1.38528	1.65393	1.8921	0.173484	0.102681	0.988508	N	0.092522	0.0654823	N	4	2.63326	0.0491856	0.121223	0.0926257	-1.68634	-0.971899	-0.887319	-1.42955	-1.87576	-1.65079
451898110	Q62165	Dystroglycan (Dystrophin-associated glycoprotein 1) [Cleaved into: Alpha-dystroglycan (Alpha-DG); Beta-dystroglycan (Beta-DG)]	Dag1	0.466169	1.38144	4.01142	3.20462	0.0159777	0.0161059	1.79302	Y	0.0432996	0.0293239	Y	4	2.63326	0.0491856	0.0202572	0.0317412	0.131223	0.353313	0.358747	-0.101879	-0.0907677	-0.362576
568905803	P63038	60 kDa heat shock protein, mitochondrial (EC 3.6.4.9) (60 kDa chaperonin) (Chaperonin 60) (CPN60) (HSP-65) (Heat shock protein 60) (HSP-60) (Hsp60) (Mitochondrial matrix protein P1)	Hspd1	0.465455	1.38075	1.05254	1.28628	0.351932	0.241416	0.617233	N	0.142845	0.110919	N	4	2.63326	0.0491856	0.293337	0.196414	0.26593	0.853038	0.371673	-0.508385	-0.218473	0.821135
8567338	Q9QZE5	Coatomer subunit gamma-1 (Gamma-1-coat protein) (Gamma-1-COP)	Copg1	0.459817	1.37537	2.10376	2.24837	0.103214	0.0614056	1.21179	N	0.0739819	0.0498122	Y	4	2.63326	0.0491856	0.0716587	0.0627374	-1.71762	-1.35483	-1.47065	-2.24763	-2.06746	-1.60746
112181182	P12787	Cytochrome c oxidase subunit 5A, mitochondrial (Cytochrome c oxidase polypeptide Va)	Cox5a	0.459505	1.37507	1.37923	1.62511	0.239918	0.15053	0.822376	N	0.110479	0.0805081	N	4	2.63326	0.0491856	0.166493	0.119924	0.0116678	0.670048	0.236473	-0.692589	0.170699	0.0615642
18860551	Q9ES46	Beta-parvin	Parvb	0.45892	1.37451	2.7986	2.68414	0.0488811	0.0329827	1.48171	Y	0.0533286	0.0369022	Y	4	2.63326	0.0491856	0.0403351	0.0438486	-1.21549	-0.96875	-0.971909	-1.31046	-1.78581	-1.43664
6678329	P21981	Protein-glutamine gamma-glutamyltransferase 2 (EC 2.3.2.13) (Tissue transglutaminase) (Transglutaminase C) (TG(C)) (TGC) (TGase C) (Transglutaminase-2) (TGase-2)	Tgm2	0.458578	1.37419	0.981376	1.20558	0.381971	0.269216	0.569899	N	0.151811	0.119057	N	4	2.63326	0.0491856	0.327526	0.217031	1.09976	0.791493	0.697548	1.30489	0.00468782	-0.0965095
31982755	P20152	Vimentin	Vim	0.457729	1.37338	1.51716	1.75652	0.203826	0.124783	0.903846	N	0.0996828	0.0721485	N	4	2.63326	0.0491856	0.136536	0.10186	1.19364	0.719906	0.72342	0.920877	0.279159	0.0637437
12963633	Q9ERS2	NADH dehydrogenase [ubiquinone] 1 alpha subcomplex subunit 13 (Cell death regulatory protein GRIM-19) (Complex I-B16.6) (CI-B16.6) (Gene associated with retinoic and interferon-induced mortality 19 protein) (GRIM-19) (Gene associated with retinoic and IFN-induced mortality 19 protein) (NADH-ubiquinone oxidoreductase B16.6 subunit)	Ndufa13	0.456154	1.37188	1.49415	1.73377	0.209443	0.128916	0.889693	N	0.101552	0.0735447	N	4	2.63326	0.0491856	0.139807	0.103832	-0.316043	0.284506	-0.153703	-1.012	-0.273378	-0.268325
34538607	P03911	NADH-ubiquinone oxidoreductase chain 4 (EC 1.6.5.3) (NADH dehydrogenase subunit 4)	Mtnd4	0.448995	1.36509	0.878946	1.08777	0.429062	0.314633	0.502195	N	0.164684	0.133277	N	4	2.63326	0.0491856	0.391427	0.255564	0.689969	1.68401	1.00483	-0.147165	0.967068	1.21192
161016824	Q9Z1J3	Cysteine desulfurase, mitochondrial (m-Nfs1) (EC 2.8.1.7)	Nfs1	0.447921	1.36407	1.91454	2.08789	0.128074	0.0774014	1.11125	N	0.080801	0.055668	N	4	2.63326	0.0491856	0.0821041	0.0690362	0.0166856	0.699496	0.667902	0.114115	-0.126645	0.052852
298919223	P35545	Ubiquitin-like protein FUBI (Monoclonal non-specific suppressor factor beta) (MNSF-beta)	Fau	0.446516	1.36275	1.57413	1.79997	0.190573	0.117239	0.930927	N	0.0968341	0.069309	N	4	2.63326	0.0491856	0.120694	0.0923069	0.361354	0.909204	1.10843	0.562092	0.477134	0.000213653
568986586	UPI00038C1D0C	calcium/calmodulin-dependent protein kinase type II subunit gamma isoform X1	Camk2g	0.445763	1.36203	2.16912	2.27229	0.095905	0.0593264	1.22675	N	0.0717825	0.0490926	Y	4	2.63326	0.0491856	0.0633483	0.057726	-0.976727	-0.960046	-0.984017	-1.04398	-1.46261	-1.75149
1039767586	UPI0007EE106F	dnaJ homolog subfamily C member 11 isoform X1	Dnajc11	0.44118	1.35771	3.1923	2.81661	0.0331435	0.0273971	1.5623	Y	0.0455507	0.0343866	Y	4	2.63326	0.0491856	0.0286495	0.0368019	-1.41806	-1.37377	-1.58716	-2.10284	-1.91823	-1.68146
71774133	P24369	Peptidyl-prolyl cis-trans isomerase B (PPIase B) (EC 5.2.1.8) (CYP-S1) (Cyclophilin B) (Rotamase B) (S-cyclophilin) (SCYLP)	Ppib	0.438922	1.35559	2.04581	2.17367	0.110213	0.0683865	1.16503	N	0.0759209	0.0529247	N	4	2.63326	0.0491856	0.0690453	0.0611614	0.903243	1.2207	1.31478	1.05084	0.591117	0.48
22203747	Q02788	Collagen alpha-2(VI) chain	Col6a2	0.434966	1.35188	1.17281	1.40412	0.30595	0.205331	0.687546	N	0.13043	0.0985644	N	4	2.63326	0.0491856	0.206324	0.143943	0.848698	0.563198	0.449425	0.888047	-0.154443	-0.17718
22267442	Q9DB77	Cytochrome b-c1 complex subunit 2, mitochondrial (Complex III subunit 2) (Core protein II) (Ubiquinol-cytochrome-c reductase complex core protein 2)	Uqcrc2	0.431872	1.34898	1.26298	1.49431	0.275201	0.181063	0.74217	N	0.122305	0.0903443	N	4	2.63326	0.0491856	0.175391	0.12529	0.33867	1.0281	0.698641	-0.244737	0.299006	0.715527
114145497	Q6PGA2	GTP-binding protein RAD (Ras-related associated with diabetes)	Rrad	0.430138	1.34736	1.08207	1.30702	0.340096	0.234687	0.629511	N	0.139884	0.109443	N	4	2.63326	0.0491856	0.237027	0.162458	0.726067	0.458787	0.287001	0.804311	-0.210755	-0.412115
6677923	P82350	Alpha-sarcoglycan (Alpha-SG) (50 kDa dystrophin-associated glycoprotein) (50DAG) (Adhalin)	Sgca	0.42149	1.33931	3.27794	2.77999	0.0305599	0.0288334	1.5401	Y	0.0447269	0.0345552	Y	4	2.63326	0.0491856	0.0248007	0.034481	0.612287	0.854553	0.812518	0.546201	0.254942	0.213744
569007760	Q3UBX0	Transmembrane protein 109 (Mitsugumin-23) (Mg23)	Tmem109	0.41731	1.33544	3.38598	2.80226	0.0276325	0.0279504	1.55361	Y	0.0435604	0.0343866	Y	4	2.63326	0.0491856	0.0227846	0.0332652	0.303615	0.569623	0.672353	0.167778	-0.0125042	0.138387
66841385	Q4U4S6	Xin actin-binding repeat-containing protein 2 (Beta-xin) (Cardiomyopathy-associated protein 3) (Myogenic MEF2-activated Xin-related protein) (Myomaxin) (mXinbeta)	Xirp2	0.415943	1.33417	1.21672	1.43952	0.290592	0.195476	0.708906	N	0.126324	0.0954489	N	4	2.63326	0.0491856	0.175299	0.125235	0.278544	-0.235976	-0.135104	0.151724	-0.833226	-0.658862
17647119	Q9DBL1	Short/branched chain specific acyl-CoA dehydrogenase, mitochondrial (SBCAD) (EC 1.3.8.5) (2-methyl branched chain acyl-CoA dehydrogenase) (2-MEBCAD) (2-methylbutyryl-coenzyme A dehydrogenase) (2-methylbutyryl-CoA dehydrogenase)	Acadsb	0.414958	1.33326	2.60577	2.46627	0.0596848	0.0449226	1.34753	Y	0.0573721	0.0430467	Y	4	2.63326	0.0491856	0.0380388	0.0424638	-0.197961	0.159188	0.150477	-0.547397	-0.178961	-0.406811
254540166	P20029	78 kDa glucose-regulated protein (GRP-78) (Heat shock 70 kDa protein 5) (Immunoglobulin heavy chain-binding protein) (BiP)	Hspa5	0.411337	1.32992	3.09273	2.67282	0.0364774	0.033513	1.47479	Y	0.0463279	0.0372991	Y	4	2.63326	0.0491856	0.0265339	0.0355262	0.481033	0.303506	0.305272	0.188895	-0.190063	-0.143031
24418919	Q8CI94	Glycogen phosphorylase, brain form (EC 2.4.1.1)	Pygb	0.410863	1.32948	2.38239	2.33535	0.0757921	0.0541847	1.26612	N	0.0641518	0.0469659	Y	4	2.63326	0.0491856	0.0446129	0.0464282	-0.0338062	0.45077	-0.00342428	-0.32052	-0.367001	-0.131529
225543319	Q01853	Transitional endoplasmic reticulum ATPase (TER ATPase) (EC 3.6.4.6) (15S Mg(2+)-ATPase p97 subunit) (Valosin-containing protein) (VCP)	Vcp	0.409586	1.3283	1.70518	1.87322	0.163361	0.105514	0.97669	N	0.0884439	0.0662688	N	4	2.63326	0.0491856	0.0865451	0.0717142	-0.0508371	0.724496	0.548655	-0.103792	0.0586485	0.0387001
26986555	Q8CI43	Myosin light chain 6B (Smooth muscle and nonmuscle myosin light chain alkali 6B)	Myl6b	0.4086	1.3274	0.957924	1.16632	0.392348	0.2837	0.547141	N	0.154261	0.123737	N	4	2.63326	0.0491856	0.272914	0.184099	-1.83665	-2.05416	-2.20348	-1.61479	-2.82049	-2.88481
568973927	P82347	Delta-sarcoglycan (Delta-SG) (35 kDa dystrophin-associated glycoprotein) (35DAG)	Sgcd	0.405979	1.32499	2.57111	2.42394	0.0619061	0.0477233	1.32127	Y	0.058443	0.0445102	Y	4	2.63326	0.0491856	0.0373987	0.0420779	-0.160242	0.172087	0.00491903	-0.238744	-0.647314	-0.315114
19923070	Q9CY27	Very-long-chain enoyl-CoA reductase (EC 1.3.1.93) (Synaptic glycoprotein SC2) (Trans-2,3-enoyl-CoA reductase) (TER)	Tecr	0.405887	1.3249	1.69313	1.85898	0.165683	0.1077	0.967785	N	0.0894154	0.0665427	N	4	2.63326	0.0491856	0.0862024	0.0715075	1.96013	2.0066	2.02181	2.06798	1.33616	1.36674
56797739	Q99J39	Malonyl-CoA decarboxylase, mitochondrial (MCD) (EC 4.1.1.9)	Mlycd	0.404909	1.32401	1.3754	1.58478	0.241008	0.15939	0.797538	N	0.11068	0.0837445	N	4	2.63326	0.0491856	0.130001	0.0979193	-0.733423	0.118782	0.0646718	-0.65844	-0.722293	-0.383964
148277640	O08992	Syntenin-1 (Scaffold protein Pbp1) (Syndecan-binding protein 1)	Sdcbp	0.401067	1.32048	1.07961	1.29284	0.341066	0.239271	0.62111	N	0.140028	0.110229	N	4	2.63326	0.0491856	0.207009	0.144357	1.22972	0.354141	0.306213	0.652859	-0.0775906	0.111604
319402143	P02088	Hemoglobin subunit beta-1 (Beta-1-globin) (Hemoglobin beta-1 chain) (Hemoglobin beta-major chain)	Hbb-b1	0.399663	1.3192	0.563599	0.710684	0.603124	0.501495	0.299734	N	0.211717	0.187738	N	4	2.63326	0.0491856	0.754291	0.474379	-0.495936	1.40135	1.13865	-0.473382	0.503611	0.814846
22165384	P68372	Tubulin beta-4B chain (Tubulin beta-2C chain)	Tubb4b	0.398911	1.31851	1.81972	1.94659	0.142924	0.0949217	1.02263	N	0.084267	0.0618873	N	4	2.63326	0.0491856	0.0720836	0.0629936	1.11191	0.953684	0.892158	1.00299	0.339857	0.418171
110625979	Q9D8N0	Elongation factor 1-gamma (EF-1-gamma) (eEF-1B gamma)	Eef1g	0.394497	1.31448	2.43141	2.3209	0.0718712	0.0553208	1.25711	N	0.0623241	0.0474582	Y	4	2.63326	0.0491856	0.0394876	0.0433375	0.366892	0.483092	0.683254	-0.0397613	0.00758025	0.381928
569006538	UPI0003D70E39	nebulin-related-anchoring protein isoform X1	Nrap	0.394446	1.31444	0.961484	1.16566	0.390757	0.28395	0.546758	N	0.154172	0.123737	N	4	2.63326	0.0491856	0.252454	0.171761	0.558426	-0.0104922	0.0518321	0.535346	-0.648959	-0.469959
29789080	O55029	Coatomer subunit beta' (Beta'-coat protein) (Beta'-COP) (p102)	Copb2	0.392527	1.31269	2.26895	2.22708	0.0858276	0.0633183	1.19847	N	0.0682331	0.0502187	N	4	2.63326	0.0491856	0.0448935	0.0465974	-0.921402	-0.4295	-0.44453	-1.06599	-1.03897	-0.868054
27502349	Q9DC61	Mitochondrial-processing peptidase subunit alpha (EC 3.4.24.64) (Alpha-MPP) (P-55)	Pmpca	0.390367	1.31073	1.92579	2.00797	0.126426	0.086872	1.06112	N	0.0802181	0.0587919	N	4	2.63326	0.0491856	0.0616339	0.0566922	0.221329	0.649041	0.368075	-0.140203	-0.133272	0.340819
6753098	Q9WV35	C->U-editing enzyme APOBEC-2 (EC 3.5.4.36) (mRNA(cytosine(6666)) deaminase 2)	Apobec2	0.389842	1.31025	2.32213	2.25028	0.0809474	0.0612369	1.21299	N	0.0659588	0.0498122	Y	4	2.63326	0.0491856	0.0422761	0.0450191	0.511249	0.50372	0.387717	0.403543	-0.0735177	-0.0968649
95113671	Q9CXT8	Mitochondrial-processing peptidase subunit beta (EC 3.4.24.64) (Beta-MPP) (P-52)	Pmpcb	0.389801	1.31021	1.56823	1.73849	0.191903	0.128047	0.89263	N	0.0973642	0.0732734	N	4	2.63326	0.0491856	0.0926745	0.0754104	-1.32768	-0.790926	-1.02485	-1.41808	-1.78301	-1.11177
158635992	O70400	PDZ and LIM domain protein 1 (C-terminal LIM domain protein 1) (Elfin) (LIM domain protein CLP-36)	Pdlim1	0.387002	1.30767	2.07023	2.09605	0.107202	0.0764954	1.11636	N	0.0747982	0.0553566	N	4	2.63326	0.0491856	0.0524177	0.0511346	-0.441574	-0.0607654	0.13285	-0.378168	-0.655895	-0.496431
6753556	P18242	Cathepsin D (EC 3.4.23.5)	Ctsd	0.384856	1.30573	1.99617	2.04457	0.116625	0.0823994	1.08408	N	0.0776548	0.0574587	N	4	2.63326	0.0491856	0.0557561	0.0531478	-1.05712	-0.511288	-0.812178	-0.986015	-1.17963	-1.36951
568961808	A0A1S6GWG7	Uncharacterized protein	Dnaja4	0.383519	1.30452	9.03894	3.2295	0.000829947	0.0155772	1.80751	Y	0.042108	0.0289057	Y	4	2.63326	0.0491856	0.00270041	0.021154	0.39903	0.354272	0.37873	0.00585568	-0.0813995	0.0570203
82617544	P62932	F-box only protein 40	Fbxo40	0.382995	1.30405	1.54746	1.71357	0.196662	0.132697	0.87714	N	0.0985571	0.075004	N	4	2.63326	0.0491856	0.0918831	0.0749332	-0.0643096	-0.230091	-0.072949	-0.0625431	-0.894037	-0.559754
568966575	E9QPX1	Collagen alpha-1(XVIII) chain	Col18a1	0.38256	1.30365	1.64864	1.79372	0.174567	0.118296	0.927029	N	0.0925634	0.0698134	N	4	2.63326	0.0491856	0.0807681	0.0682306	-0.670565	-0.651495	-0.812929	-0.644448	-1.36418	-1.27404
14149756	Q99L45	Eukaryotic translation initiation factor 2 subunit 2 (Eukaryotic translation initiation factor 2 subunit beta) (eIF-2-beta)	Eif2s2	0.379671	1.30105	2.77825	2.43665	0.0499077	0.0468635	1.32916	Y	0.0538681	0.0440686	Y	4	2.63326	0.0491856	0.0280133	0.0364183	-0.646688	-0.44376	-0.337107	-0.659848	-1.00413	-0.902591
755531937	E9QQ93	Xin actin-binding repeat-containing protein 1	Xirp1	0.37947	1.30086	1.18492	1.3869	0.301639	0.210287	0.677187	N	0.129242	0.10025	N	4	2.63326	0.0491856	0.15384	0.112295	0.224299	-0.389745	-0.197422	0.0131736	-0.863027	-0.651425
568975405	UPI0003D772D6	phosphoribosyl pyrophosphate synthase-associated protein 1 isoform X1	Prpsap1	0.37796	1.2995	0.93287	1.12935	0.403697	0.297931	0.525884	N	0.157264	0.12801	N	4	2.63326	0.0491856	0.24623	0.168008	-2.09936	-1.93227	-1.84974	-1.60013	-2.44778	-2.96734
568950145	UPI0003D72436	phosphatidylinositol-binding clathrin assembly protein isoform X1	Picalm	0.377126	1.29875	1.29546	1.4893	0.264868	0.182339	0.73912	N	0.118741	0.0907166	N	4	2.63326	0.0491856	0.127121	0.0961826	-0.486511	-0.392962	-0.498906	-0.260376	-1.16799	-1.08139
109627652	P06909	Complement factor H (Protein beta-1-H)	Cfh	0.374338	1.29625	0.995859	1.19443	0.375683	0.273267	0.563413	N	0.150445	0.120693	N	4	2.63326	0.0491856	0.211946	0.147333	0.464579	0.278453	0.4379	0.67134	-0.61477	0.00134668
125656150	Q2TPA8	Hydroxysteroid dehydrogenase-like protein 2 (EC 1.-.-.-)	Hsdl2	0.374204	1.29612	2.13837	2.10895	0.0992698	0.0750834	1.12446	N	0.0727404	0.0545655	N	4	2.63326	0.0491856	0.0459349	0.0472254	0.279503	0.766909	0.548655	0.0164638	0.0962861	0.359706
126723461	P42932	T-complex protein 1 subunit theta (TCP-1-theta) (CCT-theta)	Cct8	0.368966	1.29143	1.75027	1.84912	0.154968	0.10924	0.961619	N	0.0870134	0.0671307	N	4	2.63326	0.0491856	0.0666586	0.0597222	-0.447908	-0.165518	0.160215	-0.555347	-0.701811	-0.302952
124430535	Q8K2M0	39S ribosomal protein L38, mitochondrial (L38mt) (MRP-L38)	Mrpl38	0.368783	1.29126	7.03823	3.0445	0.00214783	0.0200063	1.69883	Y	0.0432996	0.0318759	Y	4	2.63326	0.0491856	0.00411819	0.022009	0.896383	0.980835	0.809643	0.496723	0.557031	0.526758
6753484	Q04857	Collagen alpha-1(VI) chain	Col6a1	0.364429	1.28737	1.10159	1.29647	0.33247	0.238091	0.623257	N	0.138257	0.110219	N	4	2.63326	0.0491856	0.164165	0.118521	0.552885	0.423565	0.28055	0.679707	-0.128861	-0.387133
31981100	P62264	40S ribosomal protein S14	Rps14	0.363481	1.28653	1.18201	1.37343	0.30267	0.214237	0.669106	N	0.12952	0.101826	N	4	2.63326	0.0491856	0.141845	0.105061	0.502033	0.0224781	-0.0583336	0.292213	-0.52314	-0.393338
551411162	P19324	Serpin H1 (47 kDa heat shock protein) (Collagen-binding protein) (Colligin) (Serine protease inhibitor J6)	Serpinh1	0.356829	1.28061	0.960083	1.14977	0.391382	0.289997	0.537606	N	0.154233	0.12565	N	4	2.63326	0.0491856	0.207203	0.144473	0.432546	0.336862	0.56503	0.819245	-0.29246	-0.262835
238814391	P80313	T-complex protein 1 subunit eta (TCP-1-eta) (CCT-eta)	Cct7	0.355982	1.27986	1.39438	1.5563	0.235661	0.165939	0.780051	N	0.10956	0.0859295	N	4	2.63326	0.0491856	0.0977651	0.0784801	0.0162771	0.560403	0.649366	-0.0273525	-0.177937	0.363391
6755488	P82348	Gamma-sarcoglycan (Gamma-SG) (35 kDa dystrophin-associated glycoprotein) (35DAG)	Sgcg	0.355785	1.27968	2.81084	2.36255	0.0482754	0.0521099	1.28308	N	0.0532009	0.0462092	Y	4	2.63326	0.0491856	0.0240322	0.0340176	-0.199229	0.176894	0.103913	-0.223504	-0.381319	-0.380954
46593021	Q9CZ13	Cytochrome b-c1 complex subunit 1, mitochondrial (Complex III subunit 1) (Core protein I) (Ubiquinol-cytochrome-c reductase complex core protein 1)	Uqcrc1	0.35394	1.27805	1.35521	1.52102	0.246827	0.174398	0.758458	N	0.112584	0.0881756	N	4	2.63326	0.0491856	0.102315	0.0812236	-0.300197	0.277442	-0.153703	-0.761899	-0.389967	-0.0864118
6755448	O08547	Vesicle-trafficking protein SEC22b (ER-Golgi SNARE of 24 kDa) (ERS-24) (ERS24) (SEC22 vesicle-trafficking protein homolog B) (SEC22 vesicle-trafficking protein-like 1) (mSec22b)	Sec22b	0.349471	1.27409	1.74124	1.8093	0.156611	0.115678	0.936751	N	0.0870134	0.0689233	N	4	2.63326	0.0491856	0.0604221	0.0559615	0.100081	0.149517	-0.259851	-0.053001	-0.5617	-0.443964
29789343	Q8JZQ9	Eukaryotic translation initiation factor 3 subunit B (eIF3b) (Eukaryotic translation initiation factor 3 subunit 9) (eIF-3-eta) (eIF3 p116)	Eif3b	0.344615	1.26981	5.01057	2.73559	0.00743468	0.0306823	1.51311	Y	0.0432996	0.0353611	Y	4	2.63326	0.0491856	0.00709556	0.0238044	0.0456484	0.240355	0.142686	-0.12375	-0.228292	-0.253115
6755482	P82349	Beta-sarcoglycan (Beta-SG) (43 kDa dystrophin-associated glycoprotein) (43DAG)	Sgcb	0.341521	1.26709	1.9902	1.94681	0.117424	0.0948909	1.02278	N	0.078033	0.0618873	N	4	2.63326	0.0491856	0.0441705	0.0461614	-0.297334	-0.000644431	-0.166238	-0.374698	-0.322195	-0.791887
1039759381	Q8C854	Myelin expression factor 2 (MEF-2) (MyEF-2)	Myef2	0.333615	1.26017	1.72852	1.77113	0.158958	0.122195	0.912946	N	0.0877418	0.0711569	N	4	2.63326	0.0491856	0.0558773	0.0532209	0.482338	0.7773	0.695658	0.661325	0.161801	0.131324
6753322	P80315	T-complex protein 1 subunit delta (TCP-1-delta) (A45) (CCT-delta)	Cct4	0.332684	1.25935	2.48731	2.15624	0.0676791	0.0701283	1.15411	N	0.0607464	0.0534616	N	4	2.63326	0.0491856	0.0268346	0.0357075	-0.587794	-0.224469	-0.26254	-0.823628	-0.648959	-0.600267
18152793	Q9D051	Pyruvate dehydrogenase E1 component subunit beta, mitochondrial (PDHE1-B) (EC 1.2.4.1)	Pdhb	0.331575	1.25839	0.99095	1.16842	0.377804	0.282908	0.548355	N	0.150995	0.123737	N	4	2.63326	0.0491856	0.167938	0.120796	1.29334	1.54662	1.19542	0.410206	1.14199	1.48846
134031976	Q6PB66	Leucine-rich PPR motif-containing protein, mitochondrial (130 kDa leucine-rich protein) (LRP 130) (mLRP130)	Lrpprc	0.329475	1.25656	1.90378	1.86894	0.129673	0.106166	0.974013	N	0.081163	0.0664378	N	4	2.63326	0.0491856	0.0449267	0.0466174	-0.433694	0.0103546	-0.0878376	-0.493838	-0.691084	-0.314681
568930715	UPI0003D75F75	microfibrillar-associated protein 2 isoform X1	Mfap2	0.318983	1.24745	1.21323	1.36384	0.291785	0.217087	0.663367	N	0.126457	0.102634	N	4	2.63326	0.0491856	0.10369	0.0820532	0.214142	-0.116048	-0.184338	0.0845653	-0.416201	-0.711556
254540076	Q8BFZ1	Trans-2,3-enoyl-CoA reductase-like (EC 1.3.1.-) (Steroid 5-alpha-reductase 2-like 2 protein)	Tecrl	0.317864	1.24648	3.76707	2.41594	0.0196542	0.0482729	1.3163	Y	0.0432996	0.0447787	Y	4	2.63326	0.0491856	0.0106799	0.0259658	1.29262	1.22983	1.29952	1.11092	0.834975	0.922483
31542606	P54320	Elastin (Tropoelastin)	Eln	0.316038	1.24491	0.882392	1.05129	0.427403	0.329909	0.481605	N	0.164234	0.13805	N	4	2.63326	0.0491856	0.192418	0.135558	0.808186	0.867723	0.888835	1.25236	0.146168	0.218103
6681273	P62631	Elongation factor 1-alpha 2 (EF-1-alpha-2) (Eukaryotic elongation factor 1 A-2) (eEF1A-2) (Statin-S1)	Eef1a2	0.316008	1.24488	3.41398	2.34345	0.0269288	0.0535579	1.27118	N	0.0435604	0.0469659	Y	4	2.63326	0.0491856	0.0128519	0.0272756	0.624612	0.780663	0.854848	0.561617	0.392973	0.357509
163310765	P07724	Serum albumin	Alb	0.31499	1.244	1.14866	1.30384	0.314715	0.235708	0.627626	N	0.133161	0.109769	N	4	2.63326	0.0491856	0.112799	0.0875456	-0.822952	-0.253802	-0.2487	-0.499007	-0.627257	-1.14416
27501448	O55135	Eukaryotic translation initiation factor 6 (eIF-6) (B4 integrin interactor) (CAB) (p27(BBP))	Eif6	0.314983	1.244	1.09155	1.25263	0.336372	0.252693	0.597407	N	0.139009	0.114357	N	4	2.63326	0.0491856	0.124905	0.0948459	0.382209	-0.164585	0.479038	-0.215855	0.324503	-0.356934
56605979	Q64152	Transcription factor BTF3 (Nascent polypeptide-associated complex subunit beta) (NAC-beta) (RNA polymerase B transcription factor 3)	Btf3	0.313747	1.24293	1.11235	1.27041	0.328332	0.246679	0.607867	N	0.137379	0.112862	N	4	2.63326	0.0491856	0.119336	0.0914878	-1.80437	-0.971498	-1.10704	-1.80017	-1.61815	-1.40583
568944560	UPI0003D6E7EA	liprin-beta-1 isoform X2	Ppfibp1	0.312242	1.24164	1.92548	1.83752	0.126471	0.111078	0.954374	N	0.0802181	0.0678335	N	4	2.63326	0.0491856	0.0394452	0.0433119	0.437859	0.438083	0.400043	0.430477	0.00785398	-0.0990718
113461996	Q99M07	Cytochrome c oxidase assembly factor 5	Coa5	0.304138	1.23468	1.74305	1.717	0.156279	0.132047	0.87927	N	0.0870134	0.0748321	N	4	2.63326	0.0491856	0.045668	0.0470644	-0.145474	0.366689	0.278701	-0.0128983	-0.131275	-0.268325
569009889	Q8BTM8	Filamin-A (FLN-A) (Actin-binding protein 280) (ABP-280) (Alpha-filamin) (Endothelial actin-binding protein) (Filamin-1) (Non-muscle filamin)	Flna	0.303907	1.23448	2.87175	2.16139	0.0453886	0.0696097	1.15733	N	0.0514481	0.0533803	N	4	2.63326	0.0491856	0.0167989	0.0296557	0.322938	0.231181	0.203727	0.082737	0.00908127	-0.245694
568976394	Q5SV64	Myosin-10	Myh10	0.3036	1.23422	1.07164	1.22507	0.344235	0.262265	0.58126	N	0.140732	0.117042	N	4	2.63326	0.0491856	0.120392	0.0921246	-0.8185	-0.722398	-0.893591	-0.565029	-1.47069	-1.30957
226823359	Q8CIE6	Coatomer subunit alpha (Alpha-coat protein) (Alpha-COP) [Cleaved into: Xenin (Xenopsin-related peptide); Proxenin]	Copa	0.303084	1.23378	1.19907	1.33497	0.296676	0.22588	0.646123	N	0.1276	0.106204	N	4	2.63326	0.0491856	0.0958362	0.077317	-0.742149	0.0049586	-0.0333596	-0.623122	-0.636388	-0.420291
226958643	Q9JK42	[Pyruvate dehydrogenase (acetyl-transferring)] kinase isozyme 2, mitochondrial (EC 2.7.11.2) (Pyruvate dehydrogenase kinase isoform 2) (PDH kinase 2)	Pdk2	0.299314	1.23056	0.885732	1.04602	0.425799	0.332165	0.478647	N	0.163803	0.138197	N	4	2.63326	0.0491856	0.171293	0.122819	-0.37367	0.346578	0.212468	-0.672571	-0.2522	0.212206
225637531	Q9DCH4	Eukaryotic translation initiation factor 3 subunit F (eIF3f) (Deubiquitinating enzyme eIF3f) (EC 3.4.19.12) (Eukaryotic translation initiation factor 3 subunit 5) (eIF-3-epsilon) (eIF3 p47)	Eif3f	0.297205	1.22876	2.62382	2.06302	0.0585644	0.0802324	1.09565	N	0.0572294	0.0568369	N	4	2.63326	0.0491856	0.0192459	0.0311313	0.547323	0.750239	0.900791	0.487856	0.338881	0.48
312222784	Q5EBQ0	Voltage-dependent anion channel 3	Vdac3	0.294948	1.22684	1.10899	1.25005	0.329619	0.253577	0.595889	N	0.137491	0.114357	N	4	2.63326	0.0491856	0.106104	0.0835084	0.3768	0.413473	0.108083	-0.491331	0.256316	0.248527
124487329	A2AUC9	Kelch-like protein 41 (Kelch repeat and BTB domain-containing protein 10)	Klhl41	0.294614	1.22656	0.973827	1.12806	0.385285	0.298437	0.525148	N	0.152725	0.12801	N	4	2.63326	0.0491856	0.137289	0.102314	0.435902	0.391606	0.213403	0.621124	-0.366507	-0.0975493
261878607	Q9Z2X1	Heterogeneous nuclear ribonucleoprotein F (hnRNP F) [Cleaved into: Heterogeneous nuclear ribonucleoprotein F, N-terminally processed]	Hnrnpf	0.293454	1.22557	2.94266	2.12815	0.042277	0.0730304	1.1365	N	0.0492384	0.0543789	N	4	2.63326	0.0491856	0.0149173	0.0285211	0.664266	0.477385	0.548527	0.391739	0.109987	0.308091
45476573	P60229	Eukaryotic translation initiation factor 3 subunit E (eIF3e) (Eukaryotic translation initiation factor 3 subunit 6) (MMTV integration site 6) (Mammary tumor-associated protein INT-6) (Viral integration site protein INT-6) (eIF-3 p48)	Eif3e	0.292807	1.22502	2.67685	2.05854	0.0554095	0.0807535	1.09284	N	0.0555718	0.0568369	N	4	2.63326	0.0491856	0.0179475	0.0303484	-1.62086	-1.54045	-1.39355	-1.6484	-1.94495	-1.83993
7657583	Q9QXX4	Calcium-binding mitochondrial carrier protein Aralar2 (Citrin) (Mitochondrial aspartate glutamate carrier 2) (Solute carrier family 25 member 13)	Slc25a13	0.288145	1.22107	2.02321	1.8134	0.113083	0.114998	0.939309	N	0.0764111	0.0687185	N	4	2.63326	0.0491856	0.0304249	0.0378725	-0.275658	-0.48803	-0.547446	-0.493006	-0.842329	-0.840233
87239988	Q69ZP3	Probable hydrolase PNKD (EC 3.-.-.-) (Myofibrillogenesis regulator 1) (MR-1) (Paroxysmal nonkinesiogenic dyskinesia protein)	Pnkd	0.287373	1.22042	2.48529	1.97931	0.0678259	0.0905419	1.04315	N	0.0607464	0.060649	N	4	2.63326	0.0491856	0.0200554	0.0316195	-1.07895	-1.03771	-1.28192	-1.34746	-1.59464	-1.3186
299890784	Q99KV1	DnaJ homolog subfamily B member 11 (APOBEC1-binding protein 2) (ABBP-2) (ER-associated DNAJ) (ER-associated Hsp40 co-chaperone) (Endoplasmic reticulum DNA J domain-containing protein 3) (ER-resident protein ERdj3) (ERdj3) (ERj3p)	Dnajb11	0.27923	1.21355	0.926731	1.07267	0.40652	0.320885	0.493651	N	0.158114	0.135266	N	4	2.63326	0.0491856	0.136179	0.101644	0.723311	0.198208	0.440519	0.675541	0.0477643	-0.198958
6680690	P20108	Thioredoxin-dependent peroxide reductase, mitochondrial (EC 1.11.1.15) (Antioxidant protein 1) (AOP-1) (PRX III) (Perioredoxin-3) (Protein MER5)	Prdx3	0.27859	1.21301	1.13646	1.25529	0.31923	0.251786	0.598969	N	0.134234	0.114357	N	4	2.63326	0.0491856	0.0901389	0.0738814	1.25897	1.06898	0.90199	0.366061	0.922349	1.10576
239052674	E9Q3X0	Major vault protein	Mvp	0.278174	1.21266	2.10608	1.81318	0.102945	0.115036	0.939167	N	0.0739819	0.0687185	N	4	2.63326	0.0491856	0.0261682	0.0353056	-0.301017	-0.314384	0.0293294	-0.339522	-0.571518	-0.509553
13324686	Q9DCC8	Mitochondrial import receptor subunit TOM20 homolog (Mitochondrial 20 kDa outer membrane protein) (Outer mitochondrial membrane receptor Tom20)	Tomm20	0.266934	1.20325	1.82546	1.65828	0.141974	0.143591	0.842873	N	0.0841214	0.078556	N	4	2.63326	0.0491856	0.0320742	0.0388671	0.909103	1.1488	0.869373	0.554943	0.632348	0.939182
45504394	P09055	Integrin beta-1 (Fibronectin receptor subunit beta) (VLA-4 subunit beta) (CD antigen CD29)	Itgb1	0.265804	1.20231	3.31059	2.04438	0.0296381	0.0824218	1.08396	N	0.0447269	0.0574587	N	4	2.63326	0.0491856	0.00966946	0.0253565	-0.914117	-0.726329	-0.866623	-1.20716	-1.01083	-1.08649
568994923	UPI0003D7316B	eukaryotic translation initiation factor 4 gamma 1 isoform X1	Eif4g1	0.26573	1.20224	1.21215	1.29667	0.292154	0.238024	0.623379	N	0.126457	0.110219	N	4	2.63326	0.0491856	0.0720872	0.0629958	-1.32476	-1.10228	-1.28697	-1.33034	-1.91823	-1.26263
568996433	P58281	Dynamin-like 120 kDa protein, mitochondrial (EC 3.6.5.5) (Large GTP-binding protein) (LargeG) (Optic atrophy protein 1 homolog) [Cleaved into: Dynamin-like 120 kDa protein, form S1]	Opa1	0.26269	1.19971	1.22467	1.30111	0.28789	0.236587	0.62601	N	0.125898	0.109986	N	4	2.63326	0.0491856	0.0690145	0.0611429	0.358543	0.944223	0.623384	0.185794	0.32151	0.630777
312433955	E9PVY8	Microtubule-actin cross-linking factor 1	Macf1	0.262053	1.19918	1.84156	1.64987	0.139346	0.145322	0.83767	N	0.0831454	0.0790815	N	4	2.63326	0.0491856	0.0303735	0.0378415	-0.556656	-0.60973	-0.433811	-0.552731	-1.00857	-0.825054
1039762360	UPI0007EC8FDA	vacuolar protein sorting-associated protein 16 homolog isoform X1	Vps16	0.26107	1.19837	2.17507	1.77207	0.0952685	0.122031	0.913528	N	0.0717825	0.0711569	N	4	2.63326	0.0491856	0.0216102	0.0325571	-2.15669	-1.95957	-1.92981	-2.44644	-2.27104	-2.1118
31542970	P35385	Heat shock protein beta-7 (HspB7) (Cardiovascular heat shock protein) (cvHsp) (Heat shock protein 25 kDa 2) (Protein p19/6.8)	Hspb7	0.260243	1.19768	1.38001	1.40187	0.239698	0.205973	0.68619	N	0.110479	0.098605	N	4	2.63326	0.0491856	0.0533437	0.0516931	0.826597	0.493943	0.653848	0.718341	0.282278	0.193041
170172530	P01592	Immunoglobulin J chain	Jchain	0.258537	1.19627	1.73575	1.59132	0.157618	0.15792	0.801562	N	0.0872868	0.0832891	N	4	2.63326	0.0491856	0.0332783	0.0395932	-0.0319563	0.00944322	-0.311945	-0.513914	-0.155033	-0.441123
6679809	O08917	Flotillin-1	Flot1	0.25818	1.19597	1.81441	1.62551	0.143809	0.150443	0.822627	N	0.0843238	0.0805081	N	4	2.63326	0.0491856	0.0303715	0.0378403	-0.293043	-0.458923	-0.515281	-0.431338	-0.776958	-0.833491
157951604	P40124	Adenylyl cyclase-associated protein 1 (CAP 1)	Cap1	0.255817	1.19401	1.16217	1.24478	0.309781	0.255388	0.5928	N	0.131566	0.114871	N	4	2.63326	0.0491856	0.0726787	0.0633524	-1.40544	-0.683838	-0.889412	-1.21004	-1.19042	-1.34568
21312298	Q9CZN7	Serine hydroxymethyltransferase (EC 2.1.2.1)	Shmt2	0.255513	1.19376	1.44718	1.4325	0.2214	0.197394	0.704666	N	0.105093	0.0959769	N	4	2.63326	0.0491856	0.0467598	0.0477228	-0.0665912	0.15283	0.349971	0.133972	-0.305739	-0.158562
148747189	P27546	Microtubule-associated protein 4 (MAP-4)	Map4	0.253237	1.19188	1.97937	1.6739	0.118887	0.140431	0.852535	N	0.0781748	0.0775297	N	4	2.63326	0.0491856	0.0245523	0.0343312	-0.144188	-0.135574	-0.0100861	-0.112434	-0.433999	-0.503126
568925560	E0CYV9	RIKEN cDNA 1110002E22 gene	1110002E22Rik	0.252356	1.19115	1.18647	1.25712	0.301092	0.251164	0.600043	N	0.129171	0.114357	N	4	2.63326	0.0491856	0.0678588	0.060446	0.116273	0.0558919	0.0913312	0.216028	-0.192991	-0.516609
568916002	UPI0003D74B10	dolichyl-diphosphooligosaccharide--protein glycosyltransferase subunit 2 isoform X5	Rpn2	0.25208	1.19092	2.42647	1.80401	0.0722563	0.116561	0.933448	N	0.0624716	0.069027	N	4	2.63326	0.0491856	0.016189	0.0292879	-1.66502	-1.38333	-1.35135	-1.72168	-1.7679	-1.66636
569007394	UPI0003D7757E	protein prune homolog 2 isoform X1	Prune2	0.25204	1.19089	0.935672	1.0578	0.402414	0.32714	0.485266	N	0.156945	0.137059	N	4	2.63326	0.0491856	0.108839	0.0851577	-2.37296	-2.45173	-2.52496	-2.24852	-2.68838	-3.16887
568912862	UPI0003D78A9B	carnitine O-acetyltransferase isoform X1	Crat	0.252007	1.19086	0.464977	0.577918	0.666133	0.582396	0.234781	N	0.22667	0.208997	N	4	2.63326	0.0491856	0.440611	0.285223	0.0968205	1.09603	0.958506	-0.373544	0.638659	1.13022
755519908	UPI0005ABA4EC	phospholemman isoform X1	Fxyd1	0.25068	1.18977	2.60551	1.83812	0.0597008	0.110982	0.954749	N	0.0573721	0.0678335	N	4	2.63326	0.0491856	0.013885	0.0278986	0.072575	0.130778	-0.12884	-0.122835	-0.241956	-0.312737
112293269	G3X9Q1	Integrin alpha-7	Itga7	0.248471	1.18795	2.17221	1.71842	0.095573	0.13178	0.88015	N	0.0717825	0.0748321	N	4	2.63326	0.0491856	0.0196262	0.0313607	0.843545	0.808112	0.732742	0.760809	0.478445	0.399733
755556461	UPI0000607B37	ATP-binding cassette sub-family F member 1 isoform X1;	Abcf1	0.247527	1.18717	1.22489	1.2758	0.287814	0.24488	0.611047	N	0.125898	0.112209	N	4	2.63326	0.0491856	0.061255	0.0564637	-0.393609	-0.0963497	0.149551	-0.168745	-0.312852	-0.601393
6678467	P68368	Tubulin alpha-4A chain (Alpha-tubulin 4) (Alpha-tubulin isotype M-alpha-4) (Tubulin alpha-4 chain)	Tuba4a	0.246734	1.18652	1.65407	1.51754	0.173457	0.175254	0.756332	N	0.092522	0.0884777	N	4	2.63326	0.0491856	0.0333766	0.0396524	0.94184	0.827528	0.866671	0.858079	0.360683	0.677076
568990362	O08746	Matrilin-2	Matn2	0.245742	1.1857	0.756244	0.887369	0.491598	0.405903	0.391578	N	0.182687	0.161124	N	4	2.63326	0.0491856	0.158389	0.115038	-1.11858	-0.650074	-0.627793	-0.496912	-1.19578	-1.44098
15426055	Q9JIF7	Coatomer subunit beta (Beta-coat protein) (Beta-COP)	Copb1	0.24569	1.18566	2.61332	1.81386	0.0592132	0.114922	0.939597	N	0.0573721	0.0687185	N	4	2.63326	0.0491856	0.0132581	0.0275206	-0.116173	-0.0104922	0.179166	-0.299312	-0.210755	-0.174503
6753492	O89053	Coronin-1A (Coronin-like protein A) (Clipin-A) (Coronin-like protein p57) (Tryptophan aspartate-containing coat protein) (TACO)	Coro1a	0.239699	1.18075	0.863922	0.983181	0.436358	0.36001	0.443686	N	0.167106	0.146875	N	4	2.63326	0.0491856	0.115472	0.0891576	-0.798286	-0.501612	0.119487	-0.676837	-0.510512	-0.71216
568908095	UPI0003D77F87	complement decay-accelerating factor, GPI-anchored isoform X1	Cd55	0.235616	1.17741	0.428233	0.532791	0.690533	0.611551	0.213567	N	0.232869	0.215618	N	4	2.63326	0.0491856	0.45409	0.293352	-1.16752	-1.54568	-1.44905	-0.623709	-1.77543	-2.46996
257796245	Q8BMF4	Dihydrolipoyllysine-residue acetyltransferase component of pyruvate dehydrogenase complex, mitochondrial (EC 2.3.1.12) (Dihydrolipoamide acetyltransferase component of pyruvate dehydrogenase complex) (Pyruvate dehydrogenase complex component E2) (PDC-E2) (PDCE2)	Dlat	0.230934	1.17359	0.697403	0.820908	0.523961	0.440199	0.356351	N	0.191262	0.171028	N	4	2.63326	0.0491856	0.164475	0.118708	0.854526	1.1671	0.891749	0.120923	0.939459	1.16019
19527026	Q922Q8	Leucine-rich repeat-containing protein 59 [Cleaved into: Leucine-rich repeat-containing protein 59, N-terminally processed]	Lrrc59	0.230004	1.17284	2.26298	1.65791	0.0863949	0.143668	0.842641	N	0.0683402	0.078556	N	4	2.63326	0.0491856	0.0154953	0.0288696	1.08314	1.05666	1.20757	1.02959	0.908688	0.719079
568915979	Q64012	RNA-binding protein Raly (Maternally-expressed hnRNP C-related protein) (hnRNP associated with lethal yellow protein)	Raly	0.229662	1.17256	2.0196	1.59185	0.113549	0.157804	0.801883	N	0.0765085	0.0832891	N	4	2.63326	0.0491856	0.0193972	0.0312226	-0.0596019	0.156449	0.297531	-0.0112377	-0.169396	-0.113975
145699101	Q9QZS0	Collagen alpha-3(IV) chain [Cleaved into: Tumstatin]	Col4a3	0.228193	1.17137	0.236918	0.301603	0.82436	0.772189	0.112276	N	0.266593	0.255319	N	4	2.63326	0.0491856	1.39155	0.858663	-1.35123	0.396805	0.387333	0.946074	-0.485584	-1.71216
16418339	Q6ZWV3	60S ribosomal protein L10 (Protein QM homolog) (Ribosomal protein L10)	Rpl10	0.226303	1.16983	1.11804	1.16517	0.326162	0.284135	0.546475	N	0.136809	0.123737	N	4	2.63326	0.0491856	0.0614551	0.0565844	0.468789	0.69904	0.830612	0.548198	0.669505	0.101828
22164792	Q9DB15	39S ribosomal protein L12, mitochondrial (L12mt) (MRP-L12)	Mrpl12	0.223851	1.16785	0.842683	0.949602	0.446845	0.375619	0.425253	N	0.16997	0.151516	N	4	2.63326	0.0491856	0.105847	0.0833538	0.117827	0.612109	0.290051	-0.192742	-0.00723612	0.548413
126518317	P01027	Complement C3 (HSE-MSF) [Cleaved into: Complement C3 beta chain; C3-beta-c (C3bc); Complement C3 alpha chain; C3a anaphylatoxin; Acylation stimulating protein (ASP) (C3adesArg); Complement C3b alpha' chain; Complement C3c alpha' chain fragment 1; Complement C3dg fragment; Complement C3g fragment; Complement C3d fragment; Complement C3f fragment; Complement C3c alpha' chain fragment 2]	C3	0.222913	1.16709	0.567428	0.68441	0.600754	0.516906	0.286589	N	0.211209	0.191586	N	4	2.63326	0.0491856	0.231495	0.159122	0.014541	0.370037	0.618765	0.806451	-0.32859	-0.143258
116268115	Q9JLZ3	Methylglutaconyl-CoA hydratase, mitochondrial (EC 4.2.1.18) (AU-specific RNA-binding enoyl-CoA hydratase) (AU-binding enoyl-CoA hydratase) (muAUH)	Auh	0.216094	1.16158	0.468137	0.57445	0.664057	0.584608	0.233135	N	0.226498	0.209097	N	4	2.63326	0.0491856	0.319617	0.212262	0.134407	1.42539	1.28516	0.31674	0.850486	1.02945
449083341	A0A087WSN6	Fibronectin (Fibronectin 1, isoform CRA_c)	Fn1	0.215855	1.16139	0.745306	0.855933	0.497498	0.421873	0.374818	N	0.183735	0.1656	N	4	2.63326	0.0491856	0.125819	0.0953975	-0.0150431	-0.38898	-0.068499	0.145213	-0.537523	-0.727778
34787412	Q9JMG7	Hepatoma-derived growth factor-related protein 3 (HRP-3)	Hdgfl3	0.21495	1.16066	1.81648	1.46728	0.143463	0.188049	0.725729	N	0.084267	0.0926118	N	4	2.63326	0.0491856	0.0210042	0.0321916	0.142862	0.038088	0.0178848	0.0357117	-0.131275	-0.350452
6680924	P18760	Cofilin-1 (Cofilin, non-muscle isoform)	Cfl1	0.212656	1.15882	1.48198	1.33344	0.212478	0.226355	0.645211	N	0.101856	0.106281	N	4	2.63326	0.0491856	0.0308862	0.0381507	-0.885876	-0.878389	-0.75309	-1.13769	-1.23392	-0.783713
356582477	Q60597	2-oxoglutarate dehydrogenase, mitochondrial (EC 1.2.4.2) (2-oxoglutarate dehydrogenase complex component E1) (OGDC-E1) (Alpha-ketoglutarate dehydrogenase)	Ogdh	0.209831	1.15655	0.683246	0.793701	0.531974	0.454819	0.342162	N	0.193242	0.174334	N	4	2.63326	0.0491856	0.141474	0.104838	0.591307	0.629363	0.179605	-0.284225	0.494191	0.560815
7305375	O70571	[Pyruvate dehydrogenase (acetyl-transferring)] kinase isozyme 4, mitochondrial (EC 2.7.11.2) (Pyruvate dehydrogenase kinase isoform 4)	Pdk4	0.206851	1.15417	2.35647	1.55639	0.0779627	0.165918	0.780107	N	0.0650411	0.0859295	N	4	2.63326	0.0491856	0.011558	0.0264954	-0.912709	-0.715961	-0.719891	-1.10107	-0.968137	-0.899908
568989187	UPI0003D6FB38	lysyl oxidase homolog 2 isoform X1	Loxl2	0.204577	1.15235	0.871763	0.951514	0.432538	0.374716	0.426298	N	0.165831	0.151431	N	4	2.63326	0.0491856	0.0826054	0.0693385	-0.388651	-0.580222	-0.499115	-0.239394	-0.889101	-0.953224
6679299	P67778	Prohibitin (B-cell receptor-associated protein 32) (BAP 32)	Phb	0.203368	1.15138	0.66454	0.771463	0.542696	0.467019	0.330666	N	0.195418	0.177627	N	4	2.63326	0.0491856	0.14048	0.104238	-0.524644	0.145691	-0.209618	-0.851862	-0.296101	-0.0507123
47059478	Q9EPM5	Syncoilin (Syncoilin intermediate filament 1) (Syncoilin-1)	Sync	0.201983	1.15028	0.696861	0.800427	0.524266	0.451174	0.345656	N	0.191262	0.173715	N	4	2.63326	0.0491856	0.126017	0.0955168	0.0171188	-0.298891	-0.478704	0.0441735	-0.66297	-0.74763
19527130	Q99K41	EMILIN-1 (Elastin microfibril interface-located protein 1) (Elastin microfibril interfacer 1)	Emilin1	0.196477	1.1459	0.97219	1.01263	0.386007	0.346741	0.459994	N	0.152832	0.142996	N	4	2.63326	0.0491856	0.0612647	0.0564696	-0.375178	-0.319203	-0.46135	-0.18755	-0.749236	-0.808375
1039792199	UPI0007ED2C53	microtubule-associated protein 4 isoform X2	Map4	0.196099	1.1456	1.0459	1.06014	0.354643	0.326148	0.486586	N	0.14343	0.137042	N	4	2.63326	0.0491856	0.0527301	0.051323	0.0795377	0.525084	0.324797	0.248344	0.251495	-0.158717
18700024	Q91VA7	Isocitrate dehydrogenase [NAD] subunit, mitochondrial	Idh3b	0.191885	1.14225	0.279215	0.351615	0.793922	0.73603	0.133105	N	0.258724	0.24827	N	4	2.63326	0.0491856	0.708425	0.446721	-0.0281171	0.881167	-0.619545	-1.012	-0.155646	0.825497
14389431	Q60864	Stress-induced-phosphoprotein 1 (STI1) (mSTI1) (Hsc70/Hsp90-organizing protein) (Hop)	Stip1	0.190523	1.14118	3.18905	1.5469	0.0332465	0.168155	0.774291	N	0.0455507	0.0869454	N	4	2.63326	0.0491856	0.0053538	0.0227541	-0.0520429	0.0297037	-0.0559992	-0.314742	-0.133694	-0.20147
10946854	Q9D7G0	Ribose-phosphate pyrophosphokinase 1 (EC 2.7.6.1) (Phosphoribosyl pyrophosphate synthase I) (PRS-I)	Prps1	0.190309	1.14101	0.673992	0.769941	0.53726	0.467862	0.329882	N	0.194537	0.177627	N	4	2.63326	0.0491856	0.119591	0.0916417	-0.806403	-0.256337	-0.250478	-0.202849	-0.881187	-0.800108
148271071	O35682	Myeloid-associated differentiation marker (Myeloid up-regulated protein)	Myadm	0.189838	1.14064	1.99809	1.39721	0.116371	0.207307	0.683387	N	0.0776377	0.0989667	N	4	2.63326	0.0491856	0.0135404	0.0276908	-0.63942	-0.65922	-0.799198	-0.923164	-1.00857	-0.735619
71725343	Q8R3F5	Malonyl-CoA-acyl carrier protein transacylase, mitochondrial (MCT) (EC 2.3.1.39) (Mitochondrial malonyltransferase) ([Acyl-carrier-protein] malonyltransferase)	Mcat	0.186264	1.13781	0.677733	0.769676	0.535118	0.468009	0.329746	N	0.193969	0.177627	N	4	2.63326	0.0491856	0.1133	0.087848	-0.852007	-0.0780495	-0.0784258	-0.51693	-0.360842	-0.689501
568926551	UPI0003D70E44	polypyrimidine tract-binding protein 3 isoform X1	Ptbp3	0.185221	1.13699	3.00968	1.49737	0.039563	0.180288	0.744033	N	0.0484126	0.0900889	N	4	2.63326	0.0491856	0.00568108	0.0229514	0.570103	0.58073	0.605217	0.301279	0.510459	0.38865
755514337	Q8VD75	Huntingtin-interacting protein 1 (HIP-1) (Huntingtin-interacting protein I) (HIP-I)	Hip1	0.182283	1.13468	1.26032	1.13857	0.276066	0.294327	0.531171	N	0.122305	0.126869	N	4	2.63326	0.0491856	0.031378	0.0384472	-0.0151466	-0.156493	-0.136337	-0.0158015	-0.470336	-0.368689
22122825	P61161	Actin-related protein 2 (Actin-like protein 2)	Actr2	0.180971	1.13365	1.57966	1.25086	0.189334	0.253299	0.596367	N	0.096349	0.114357	N	4	2.63326	0.0491856	0.0196872	0.0313975	-0.988262	-0.623442	-0.738014	-0.93528	-0.915912	-1.04144
157951700	O09161	Calsequestrin-2 (Calsequestrin, cardiac muscle isoform)	Casq2	0.18075	1.13347	1.21845	1.11483	0.290001	0.30368	0.517584	N	0.126324	0.12961	N	4	2.63326	0.0491856	0.033009	0.0394308	0.244574	0.51221	0.250687	0.370101	0.136985	-0.0418654
568952658	UPI0003D721E3	lymphocyte-specific protein 1 isoform X1	Lsp1	0.180513	1.13329	0.459721	0.554465	0.669593	0.597448	0.2237	N	0.22753	0.211918	N	4	2.63326	0.0491856	0.231271	0.158987	-2.4906	-1.90954	-1.31535	-2.47467	-1.95231	-1.83005
108860695	Q32P00	Chromobox homolog 3 (Drosophila HP1 gamma)	Cbx3	0.17987	1.13278	0.968405	0.978066	0.387681	0.362354	0.440867	N	0.15322	0.147655	N	4	2.63326	0.0491856	0.0517481	0.0507309	-1.77819	-1.29628	-1.38477	-1.78057	-1.77615	-1.44213
568939230	F8WHU5	Sister chromatid cohesion protein PDS5 homolog B	Pds5b	0.177573	1.13098	0.897526	0.927917	0.420177	0.38597	0.413446	N	0.162446	0.154281	N	4	2.63326	0.0491856	0.0587155	0.0549324	0.134674	-0.122963	-0.0162919	0.187168	-0.369914	-0.354555
568965607	Q9CQF4	Uncharacterized protein C6orf203 homolog	0	0.176526	1.13016	0.423189	0.514012	0.693919	0.623917	0.204873	N	0.233373	0.219037	N	4	2.63326	0.0491856	0.260998	0.176913	-0.0104295	0.755333	0.579013	-0.403868	0.4383	0.759908
568941949	UPI0003D72FC7	dysferlin isoform X1	Dysf	0.17632	1.13	20.0415	1.54265	3.65811e-05	0.169166	0.771688	N	0.012398	0.0870228	N	4	2.63326	0.0491856	0.000116101	0.0195956	-1.2347	-1.24881	-1.26416	-1.4293	-1.42154	-1.42579
226443091	Q9CX86	Heterogeneous nuclear ribonucleoprotein A0 (hnRNP A0)	Hnrnpa0	0.175196	1.12912	3.90944	1.46876	0.0174021	0.187659	0.72663	N	0.0432996	0.0926118	N	4	2.63326	0.0491856	0.00301239	0.0213422	0.083705	0.201629	0.154179	-0.00215188	0.00248858	-0.0864118
146260280	Q20BD0	Heterogeneous nuclear ribonucleoprotein A/B (Heterogeneous nuclear ribonucleoprotein A/B, isoform CRA_a) (S1 protein C2)	Hnrnpab	0.169984	1.12505	2.0692	1.30041	0.107327	0.236815	0.625592	N	0.0747982	0.109986	N	4	2.63326	0.0491856	0.0101228	0.0256299	0.637846	0.594241	0.707574	0.606897	0.476512	0.3463
1039775469	UPI0007ED598D	coatomer subunit gamma-2 isoform X1	Copg2	0.166037	1.12197	1.70755	1.21358	0.162908	0.266346	0.574554	N	0.0884439	0.118254	N	4	2.63326	0.0491856	0.0141825	0.028078	0.678879	0.965846	0.912758	0.768151	0.638659	0.652563
126090932	Q9D6Z1	Nucleolar protein 56 (Nucleolar protein 5A)	Nop56	0.165271	1.12138	0.556436	0.64227	0.607572	0.542248	0.265802	N	0.212534	0.197664	N	4	2.63326	0.0491856	0.132328	0.0993225	-0.329314	0.141948	0.126526	0.28624	-0.260105	-0.582787
31982856	O08749	Dihydrolipoyl dehydrogenase, mitochondrial (EC 1.8.1.4) (Dihydrolipoamide dehydrogenase)	Dld	0.163793	1.12023	0.411819	0.497466	0.701584	0.634923	0.197279	N	0.234959	0.222217	N	4	2.63326	0.0491856	0.237283	0.162613	1.13494	1.15173	0.777934	0.169259	0.929067	1.4749
33563266	Q62425	Cytochrome c oxidase subunit NDUFA4	Ndufa4	0.161709	1.11861	0.894623	0.893986	0.421555	0.402599	0.395127	N	0.162539	0.160259	N	4	2.63326	0.0491856	0.0490096	0.0490795	1.19763	1.3756	1.29656	0.782062	1.28721	1.31539
42415475	P09103	Protein disulfide-isomerase (PDI) (EC 5.3.4.1) (Cellular thyroid hormone-binding protein) (Endoplasmic reticulum resident protein 59) (ER protein 59) (ERp59) (Prolyl 4-hydroxylase subunit beta) (p55)	P4hb	0.159123	1.11661	0.534678	0.617396	0.62121	0.557562	0.253707	N	0.215716	0.201548	N	4	2.63326	0.0491856	0.132854	0.0996394	-1.64953	-2.12517	-1.70111	-1.50982	-2.39101	-2.05235
568974184	UPI0003D70E62	myosin phosphatase Rho-interacting protein isoform X1	Mprip	0.158717	1.11629	0.615882	0.688997	0.571291	0.514193	0.288874	N	0.203169	0.191444	N	4	2.63326	0.0491856	0.0996187	0.0795979	-1.08167	-1.30488	-1.18676	-0.85953	-1.67546	-1.51447
21313536	Q9D2G2	Dihydrolipoyllysine-residue succinyltransferase component of 2-oxoglutarate dehydrogenase complex, mitochondrial (EC 2.3.1.61) (2-oxoglutarate dehydrogenase complex component E2) (OGDC-E2) (Dihydrolipoamide succinyltransferase component of 2-oxoglutarate dehydrogenase complex) (E2K)	Dlst	0.157338	1.11523	0.516505	0.599089	0.632744	0.568999	0.244889	N	0.218601	0.20523	N	4	2.63326	0.0491856	0.13919	0.10346	1.00338	0.91754	0.443164	0.163988	0.709183	1.0189
153791809	Q70IV5	Synemin (Desmuslin)	Synm	0.156992	1.11496	0.728608	0.775202	0.506607	0.464952	0.332592	N	0.186223	0.177226	N	4	2.63326	0.0491856	0.0696396	0.0615198	-0.514191	-0.794277	-0.838788	-0.494001	-1.08912	-1.03511
1039776679	UPI0001552D90	histone H3.3-like;	LOC105242736	0.156914	1.1149	0.197036	0.249524	0.853406	0.810505	0.0912442	N	0.272348	0.263715	N	4	2.63326	0.0491856	0.95131	0.593186	-0.08622	-0.166894	-0.136336	0.430841	0.585247	-1.87628
12963603	Q9JKL4	NADH dehydrogenase [ubiquinone] 1 alpha subcomplex assembly factor 3 (Protein 2P1)	Ndufaf3	0.154238	1.11283	0.855519	0.854021	0.440483	0.422859	0.373804	N	0.168306	0.165797	N	4	2.63326	0.0491856	0.0487545	0.0489256	-0.104382	0.394637	0.118635	-0.232223	0.113334	0.0650653
226437587	P08122	Collagen alpha-2(IV) chain [Cleaved into: Canstatin]	Col4a2	0.153867	1.11255	0.621637	0.688378	0.567857	0.514559	0.288565	N	0.202511	0.191444	N	4	2.63326	0.0491856	0.0918982	0.0749422	0.427859	0.0758076	0.126698	0.482765	-0.0513663	-0.262634
116517301	Q922I7	MCG13402, isoform CRA_c (Polypyrimidine tract-binding protein 1)	Ptbp1	0.150781	1.11017	1.02244	0.93275	0.364373	0.383645	0.416071	N	0.147014	0.153588	N	4	2.63326	0.0491856	0.0326216	0.0391972	0.163007	0.0738313	0.250009	0.275971	-0.191621	-0.0498461
13385624	Q6ZWX6	Eukaryotic translation initiation factor 2 subunit 1 (Eukaryotic translation initiation factor 2 subunit alpha) (eIF-2-alpha) (eIF-2A) (eIF-2alpha)	Eif2s1	0.150447	1.10991	1.32989	1.04481	0.254319	0.332683	0.477969	N	0.115078	0.138197	N	4	2.63326	0.0491856	0.0191966	0.0311016	-0.228985	-0.510323	-0.337908	-0.442699	-0.66508	-0.420778
672424487	P61979	Heterogeneous nuclear ribonucleoprotein K (hnRNP K)	Hnrnpk	0.150441	1.10991	1.53608	1.09717	0.199322	0.310792	0.50753	N	0.0985571	0.131987	N	4	2.63326	0.0491856	0.0143879	0.0282018	0.00935765	0.292538	0.307089	0.0615517	0.0713038	0.0248056
568929722	UPI0000D660C6	transcription factor BTF3 homolog 4 isoform X1;	Btf3l4;	0.149267	1.10901	0.895073	0.864861	0.421341	0.417292	0.37956	N	0.162539	0.164367	N	4	2.63326	0.0491856	0.0417158	0.0446811	-2.05553	-2.02	-1.79409	-2.04091	-1.89297	-2.38354
21426823	P43275	Histone H1.1 (H1 VAR.3) (Histone H1a) (H1a)	Hist1h1a	0.148345	1.1083	1.08932	0.953591	0.337245	0.373737	0.427434	N	0.139049	0.1513	N	4	2.63326	0.0491856	0.0278183	0.0363006	1.27593	1.37989	1.19468	0.993834	1.02682	1.38481
568921414	UPI000024F4F3	Calcium/calmodulin-dependent protein kinase type II subunit delta	Camk2d	0.148002	1.10803	1.54023	1.08564	0.19835	0.31551	0.500987	N	0.0985571	0.133329	N	4	2.63326	0.0491856	0.0138503	0.0278776	-0.51291	-0.448658	-0.21715	-0.568194	-0.581509	-0.473021
16716343	Q9CPQ1	Cytochrome c oxidase subunit 6C (Cytochrome c oxidase polypeptide VIc)	Cox6c	0.146022	1.10651	0.585069	0.649277	0.589915	0.537981	0.269233	N	0.208046	0.196527	N	4	2.63326	0.0491856	0.0934362	0.0758697	-0.14744	0.160698	-0.0584239	-0.618626	0.136338	-0.000944495
125628659	Q8BSY0	Aspartyl/asparaginyl beta-hydroxylase (EC 1.14.11.16) (Aspartate beta-hydroxylase) (ASP beta-hydroxylase) (Peptide-aspartate beta-dioxygenase)	Asph	0.144473	1.10533	1.26094	0.998546	0.275865	0.353037	0.452179	N	0.122305	0.144547	N	4	2.63326	0.0491856	0.0196915	0.0314001	0.682956	0.431191	0.431112	0.524606	0.315123	0.27211
257471003	P20918	Plasminogen (EC 3.4.21.7) [Cleaved into: Plasmin heavy chain A; Activation peptide; Angiostatin; Plasmin heavy chain A, short form; Plasmin light chain B]	Plg	0.142801	1.10405	0.5563	0.621742	0.607657	0.554868	0.25581	N	0.212534	0.201406	N	4	2.63326	0.0491856	0.0988413	0.0791291	-0.0010841	-0.0944083	-0.0736004	0.300917	-0.361341	-0.537073
13385168	Q9CR68	Cytochrome b-c1 complex subunit Rieske, mitochondrial (EC 1.10.2.2) (Complex III subunit 5) (Cytochrome b-c1 complex subunit 5) (Rieske iron-sulfur protein) (RISP) (Rieske protein UQCRFS1) (Ubiquinol-cytochrome c reductase iron-sulfur subunit) [Cleaved into: Cytochrome b-c1 complex subunit 9 (Su9) (Subunit 9) (8 kDa subunit 9) (Complex III subunit IX) (Cytochrome b-c1 complex subunit 11) (Ubiquin…	Uqcrfs1	0.141572	1.10311	0.632948	0.681253	0.561147	0.518778	0.285019	N	0.200826	0.191763	N	4	2.63326	0.0491856	0.0750427	0.064778	0.876874	1.40192	0.980279	0.694646	0.909232	1.23048
8394027	Q76MZ3	Serine/threonine-protein phosphatase 2A 65 kDa regulatory subunit A alpha isoform (PP2A subunit A isoform PR65-alpha) (PP2A subunit A isoform R1-alpha)	Ppp2r1a	0.141472	1.10303	1.58522	1.05979	0.188097	0.326299	0.486384	N	0.0960078	0.137042	N	4	2.63326	0.0491856	0.0119469	0.0267298	0.292167	0.405545	0.381553	0.382511	0.145946	0.126392
6678419	Q64514	Tripeptidyl-peptidase 2 (TPP-2) (EC 3.4.14.10) (Tripeptidyl aminopeptidase) (Tripeptidyl-peptidase II) (TPP-II)	Tpp2	0.13995	1.10187	1.17586	0.95314	0.304857	0.37395	0.427187	N	0.130127	0.1513	N	4	2.63326	0.0491856	0.0212483	0.0323388	0.373224	0.532607	0.593209	0.307147	0.220156	0.551887
6756037	P68510	14-3-3 protein eta	Ywhah	0.139682	1.10166	1.16703	0.94919	0.308026	0.375813	0.425028	N	0.131123	0.151516	N	4	2.63326	0.0491856	0.0214886	0.0324837	-0.557222	-0.642964	-0.624735	-0.522336	-0.913232	-0.808399
6755901	P68369	Tubulin alpha-1A chain (Alpha-tubulin 1) (Alpha-tubulin isotype M-alpha-1) (Tubulin alpha-1 chain) [Cleaved into: Detyrosinated tubulin alpha-1A chain]	Tuba1a	0.136862	1.09951	0.629629	0.671752	0.56311	0.524438	0.280306	N	0.201316	0.192814	N	4	2.63326	0.0491856	0.0708737	0.062264	0.873427	0.722204	0.72685	0.751609	0.227225	0.933062
112293266	Q3U2G2	Heat shock 70 kDa protein 4 (Heat shock protein 4, isoform CRA_a)	Hspa4	0.135265	1.09829	1.20796	0.94293	0.293596	0.378781	0.421612	N	0.126757	0.152354	N	4	2.63326	0.0491856	0.0188086	0.0308676	-0.997595	-0.836182	-0.832774	-0.906368	-1.21844	-0.947538
6753320	P80318	T-complex protein 1 subunit gamma (TCP-1-gamma) (CCT-gamma) (Matricin) (mTRiC-P5)	Cct3	0.131509	1.09544	0.507086	0.568162	0.638772	0.58863	0.230157	N	0.219877	0.210097	N	4	2.63326	0.0491856	0.100888	0.0803632	0.465422	0.263208	0.446158	0.729988	-0.128861	0.179134
7106439	P99024	Tubulin beta-5 chain	Tubb5	0.129895	1.09421	0.946688	0.832082	0.397403	0.434291	0.362219	N	0.155527	0.169696	N	4	2.63326	0.0491856	0.02824	0.036555	0.528086	0.325204	0.460905	0.475735	0.0670977	0.381676
51172612	P21614	Vitamin D-binding protein (DBP) (VDB) (Gc-globulin) (Group-specific component)	Gc	0.129676	1.09405	2.55337	1.07422	0.0630793	0.320237	0.494528	N	0.0590372	0.135159	N	4	2.63326	0.0491856	0.00386887	0.0218586	-0.153217	-0.225902	-0.27878	-0.416892	-0.29758	-0.332456
9845295	P83882	60S ribosomal protein L36a (60S ribosomal protein L44)	Rpl36a	0.128506	1.09316	0.955385	0.830766	0.393485	0.434984	0.361527	N	0.154383	0.169773	N	4	2.63326	0.0491856	0.0271382	0.0358906	0.456971	0.527604	0.723939	0.611957	0.470505	0.240534
6680297	P63037	DnaJ homolog subfamily A member 1 (DnaJ protein homolog 2) (Heat shock 40 kDa protein 4) (Heat shock protein J2) (HSJ-2)	Dnaja1	0.12696	1.09199	0.454841	0.518309	0.672815	0.621076	0.206855	N	0.228028	0.218263	N	4	2.63326	0.0491856	0.116871	0.0900012	-0.798286	-0.990863	-1.0067	-1.1495	-1.47635	-0.550879
13385960	P56383	ATP synthase F(0) complex subunit C2, mitochondrial (ATP synthase lipid-binding protein) (ATP synthase proteolipid P2) (ATPase protein 9) (ATPase subunit c)	Atp5g2	0.12603	1.09129	0.344297	0.411464	0.747962	0.6937	0.158829	N	0.247314	0.238401	N	4	2.63326	0.0491856	0.200989	0.140726	1.83338	2.63161	1.94289	1.60317	2.51437	1.91225
22094075	P51881	ADP/ATP translocase 2 (ADP,ATP carrier protein 2) (Adenine nucleotide translocator 2) (ANT 2) (Solute carrier family 25 member 5) [Cleaved into: ADP/ATP translocase 2, N-terminally processed]	Slc25a5	0.125953	1.09123	0.522897	0.574864	0.628672	0.584343	0.233332	N	0.217861	0.209097	N	4	2.63326	0.0491856	0.0870308	0.0720071	0.773123	0.301758	0.262782	0.668357	0.193903	0.0975451
47059495	Q9JKB3	Y-box-binding protein 3 (Cold shock domain-containing protein A) (DNA-binding protein A) (Y-box protein 3)	Ybx3	0.125946	1.09122	1.93817	1.00956	0.12464	0.348104	0.458291	N	0.080027	0.143184	N	4	2.63326	0.0491856	0.00633405	0.0233452	0.161707	0.0664698	0.0690457	0.0785248	-0.0422497	-0.116892
882939085	B2RQK7	Synaptopodin 2-like protein (Synpo2l protein)	Synpo2l	0.123675	1.08951	0.422931	0.486659	0.694092	0.642165	0.192353	N	0.233373	0.223778	N	4	2.63326	0.0491856	0.128267	0.0968733	0.0957321	-0.0710337	-0.11431	0.40416	-0.327723	-0.537073
568935156	UPI0003D7740E	ecto-ADP-ribosyltransferase 3 isoform X1	Art3	0.122225	1.08841	1.64083	0.955495	0.176176	0.372842	0.428475	N	0.0928599	0.1513	N	4	2.63326	0.0491856	0.00832308	0.0245446	-0.386241	-0.191128	-0.233994	-0.42228	-0.303888	-0.451871
568991691	P47857	ATP-dependent 6-phosphofructokinase, muscle type (ATP-PFK) (PFK-M) (EC 2.7.1.11) (6-phosphofructokinase type A) (Phosphofructo-1-kinase isozyme A) (PFK-A) (Phosphohexokinase)	Pfkm	0.121807	1.0881	1.215	0.881875	0.291179	0.408661	0.388636	N	0.126358	0.161712	N	4	2.63326	0.0491856	0.0150758	0.0286167	-1.52019	-1.58646	-1.59449	-1.5094	-1.71273	-1.84443
568975333	UPI0003D76DB5	clathrin heavy chain 1 isoform X1	Cltc	0.121549	1.0879	1.46255	0.927283	0.217413	0.386276	0.413102	N	0.103928	0.154281	N	4	2.63326	0.0491856	0.0103602	0.0257731	0.0515011	-0.123504	-0.101054	-0.0617678	-0.201851	-0.274084
6754254	P07901	Heat shock protein HSP 90-alpha (Heat shock 86 kDa) (HSP 86) (HSP86) (Tumor-specific transplantation 86 kDa antigen) (TSTA)	Hsp90aa1	0.115736	1.08353	0.370929	0.432153	0.7295	0.679329	0.16792	N	0.242911	0.234403	N	4	2.63326	0.0491856	0.146032	0.107586	1.07158	0.419903	0.367469	0.79047	0.083849	0.637424
76443694	P62983	Ubiquitin-40S ribosomal protein S27a (Ubiquitin carboxyl extension protein 80) [Cleaved into: Ubiquitin; 40S ribosomal protein S27a]	Rps27a	0.115714	1.08351	0.917439	0.769549	0.410824	0.468079	0.329681	N	0.159308	0.177627	N	4	2.63326	0.0491856	0.0238622	0.0339151	0.647075	0.587157	0.438156	0.661191	0.337949	0.326105
6671746	P45591	Cofilin-2 (Cofilin, muscle isoform)	Cfl2	0.112536	1.08113	1.0188	0.7884	0.365904	0.457707	0.339413	N	0.147346	0.175245	N	4	2.63326	0.0491856	0.0183018	0.030562	0.185435	0.0664698	0.0431477	0.188149	-0.124044	-0.106661
755550293	P29341	Polyadenylate-binding protein 1 (PABP-1) (Poly(A)-binding protein 1)	Pabpc1	0.111227	1.08015	1.56473	0.877571	0.192696	0.410832	0.386336	N	0.09762	0.162383	N	4	2.63326	0.0491856	0.00757934	0.0240961	-0.290586	-0.354646	-0.205806	-0.440538	-0.28252	-0.461661
33859813	Q6A0D4	Raftlin (Raft-linking protein)	Rftn1	0.110179	1.07936	0.981119	0.767245	0.382084	0.469358	0.328496	N	0.151811	0.177718	N	4	2.63326	0.0491856	0.0189166	0.0309327	0.309857	0.64987	0.472271	0.456387	0.376758	0.268317
21704096	Q921F2	TAR DNA-binding protein 43 (TDP-43)	Tardbp	0.109803	1.07908	1.73978	0.88427	0.156878	0.407457	0.389918	N	0.0870188	0.161422	N	4	2.63326	0.0491856	0.00597488	0.0231286	0.168268	0.355236	0.352872	0.172636	0.206466	0.167865
52421788	Q8R361	Rab11 family-interacting protein 5 (Rab11-FIP5) (Rab11-interacting protein Rip11)	Rab11fip5	0.10833	1.07798	0.84813	0.716568	0.444136	0.498085	0.302696	N	0.16932	0.186941	N	4	2.63326	0.0491856	0.0244717	0.0342826	-2.21844	-2.1547	-2.49531	-2.32853	-2.32041	-2.5445
29789128	Q9D0G0	28S ribosomal protein S30, mitochondrial (MRP-S30) (S30mt)	Mrps30	0.106081	1.0763	0.304748	0.361554	0.775756	0.728926	0.137317	N	0.254518	0.24679	N	4	2.63326	0.0491856	0.181754	0.129127	-0.737715	-0.385111	-0.661069	-1.08411	-0.041179	-0.976848
6679261	P35486	Pyruvate dehydrogenase E1 component subunit alpha, somatic form, mitochondrial (EC 1.2.4.1) (PDHE1-A type I)	Pdha1	0.104329	1.07499	0.29482	0.350636	0.782799	0.736731	0.132691	N	0.256332	0.24827	N	4	2.63326	0.0491856	0.187841	0.132798	0.104133	0.553647	0.131622	-0.456705	0.299064	0.634055
28173550	E9Q1G8	Septin-7	Sept7	0.102303	1.07349	0.804361	0.677941	0.466275	0.520746	0.283374	N	0.175392	0.191993	N	4	2.63326	0.0491856	0.0242644	0.0341576	-0.278507	0.0806241	-0.235647	-0.341515	-0.257162	-0.141763
134288882	O35206	Collagen alpha-1(XV) chain [Cleaved into: Restin (Endostatin-XV)]	Col15a1	0.102147	1.07337	0.40131	0.447578	0.708707	0.668707	0.174764	N	0.236876	0.231291	N	4	2.63326	0.0491856	0.0971818	0.0781284	0.928527	0.712573	0.681899	1.14328	0.535881	0.337396
32880233	P68433	Histone H3.1	Hist1h3a; Hist1h3g; Hist1h3h; Hist1h3i	0.0988307	1.07091	0.188256	0.233458	0.859841	0.822446	0.0848926	N	0.273777	0.266587	N	4	2.63326	0.0491856	0.413406	0.268818	-1.09903	-0.92696	-1.0073	-0.587307	-0.587305	-2.15517
21313286	Q9CWE0	Mitochondrial fission regulator 1-like	Mtfr1l	0.0978333	1.07017	0.314694	0.366393	0.768726	0.725478	0.139376	N	0.252455	0.245866	N	4	2.63326	0.0491856	0.144973	0.106948	-0.0874557	-0.373768	-0.408276	-0.0876087	-0.100197	-0.975194
186700620	Q99MR8	Methylcrotonoyl-CoA carboxylase subunit alpha, mitochondrial (MCCase subunit alpha) (EC 6.4.1.4) (3-methylcrotonyl-CoA carboxylase 1) (3-methylcrotonyl-CoA carboxylase biotin-containing subunit) (3-methylcrotonyl-CoA:carbon dioxide ligase subunit alpha)	Mccc1	0.0944023	1.06762	0.269734	0.320275	0.800708	0.758611	0.119981	N	0.260186	0.252839	N	4	2.63326	0.0491856	0.183732	0.13032	-0.143759	0.632563	0.281813	-0.373053	0.395022	0.465441
22203755	Q8R1B4	Eukaryotic translation initiation factor 3 subunit C (eIF3c) (Eukaryotic translation initiation factor 3 subunit 8) (eIF3 p110)	Eif3c	0.0912853	1.06532	0.845553	0.644753	0.445416	0.540734	0.267016	N	0.169617	0.197322	N	4	2.63326	0.0491856	0.0174828	0.0300681	-0.352076	-0.375731	-0.107358	-0.265445	-0.490632	-0.352944
27229036	Q9DBG7	Signal recognition particle receptor subunit alpha (SR-alpha) (Docking protein alpha) (DP-alpha)	Srpra	0.0901133	1.06445	0.805224	0.628317	0.46583	0.550807	0.259001	N	0.175392	0.200277	N	4	2.63326	0.0491856	0.0187861	0.030854	-1.75762	-1.5966	-1.41736	-1.57554	-1.75096	-1.71542
755553854	UPI0001547ED4	zinc finger and BTB domain containing 20, isoform CRA_e	Zbtb20	0.0900017	1.06437	1.0784	0.68591	0.341547	0.516017	0.287336	N	0.140028	0.19157	N	4	2.63326	0.0491856	0.010448	0.025826	0.865024	1.05173	0.967014	0.959094	0.907144	0.747525
47894398	Q6IRU2	Tropomyosin alpha-4 chain (Tropomyosin-4)	Tpm4	0.0879253	1.06284	1.22772	0.692734	0.28686	0.51199	0.290738	N	0.125772	0.190904	N	4	2.63326	0.0491856	0.00769347	0.024165	0.75766	0.587152	0.797742	0.6819	0.574766	0.622112
9789991	O70503	Very-long-chain 3-oxoacyl-CoA reductase (EC 1.1.1.330) (17-beta-hydroxysteroid dehydrogenase 12) (17-beta-HSD 12) (3-ketoacyl-CoA reductase) (KAR) (Estradiol 17-beta-dehydrogenase 12) (EC 1.1.1.62) (KIK-I)	Hsd17b12	0.0793857	1.05657	0.727594	0.558615	0.507165	0.594768	0.225652	N	0.186226	0.21144	N	4	2.63326	0.0491856	0.0178565	0.0302935	-0.847996	-1.08983	-0.724303	-0.928585	-0.978478	-0.993223
110681716	Q00780	Collagen alpha-1(VIII) chain [Cleaved into: Vastatin]	Col8a1	0.0765903	1.05452	0.209851	0.250687	0.844039	0.809643	0.0917065	N	0.270327	0.263685	N	4	2.63326	0.0491856	0.19981	0.140016	1.13867	1.09034	0.954683	1.69713	0.529444	0.727348
267844804	Q91VN4	MICOS complex subunit Mic25 (Coiled-coil-helix-coiled-coil-helix domain-containing protein 6)	Chchd6	0.0731607	1.05202	0.563075	0.480351	0.603449	0.646412	0.18949	N	0.211717	0.224859	N	4	2.63326	0.0491856	0.025323	0.0347959	-0.52056	-0.729685	-0.743155	-0.546259	-0.920503	-0.74612
29150272	Q9D1M0	Protein SEC13 homolog (GATOR complex protein SEC13) (SEC13-like protein 1) (SEC13-related protein)	Sec13	0.0720563	1.05121	0.598652	0.488549	0.581657	0.640895	0.193213	N	0.205776	0.223778	N	4	2.63326	0.0491856	0.0217314	0.0326301	0.363672	0.633154	0.561076	0.31758	0.405357	0.618796
6678137	P47758	Signal recognition particle receptor subunit beta (SR-beta)	Srprb	0.0715847	1.05087	0.752782	0.526727	0.49346	0.615529	0.210751	N	0.182978	0.216759	N	4	2.63326	0.0491856	0.0135642	0.0277051	-0.0263007	-0.257338	0.0585997	-0.127123	-0.145844	-0.166826
213512816	P61014	Cardiac phospholamban (PLB)	Pln	0.0714257	1.05075	0.366814	0.37707	0.732338	0.717893	0.14394	N	0.243574	0.24402	N	4	2.63326	0.0491856	0.0568732	0.0538214	0.884184	1.12881	0.81715	1.17102	0.581869	0.862978
27370092	Q8BFR5	Elongation factor Tu, mitochondrial	Tufm	0.0687987	1.04884	0.537923	0.454822	0.619164	0.663747	0.177998	N	0.215385	0.230187	N	4	2.63326	0.0491856	0.0245364	0.0343216	0.371308	0.679496	0.599431	0.327783	0.634384	0.481672
40254129	P98203	Armadillo repeat protein deleted in velo-cardio-facial syndrome homolog	Arvcf	0.0675133	1.04791	0.373367	0.373155	0.72782	0.72067	0.142263	N	0.242786	0.244721	N	4	2.63326	0.0491856	0.0490453	0.049101	-1.17014	-1.15866	-1.49891	-1.15346	-1.25483	-1.62196
568987554	B2RXT3	Ogdhl protein	Ogdhl	0.0669637	1.04751	0.143809	0.176608	0.892606	0.865087	0.0629403	N	0.280861	0.278562	N	4	2.63326	0.0491856	0.325236	0.21565	-0.424296	-0.414047	-0.513246	-1.38049	-0.384196	0.212206
6754994	P60335	Poly(rC)-binding protein 1 (Alpha-CP1) (Heterogeneous nuclear ribonucleoprotein E1) (hnRNP E1)	Pcbp1	0.0656719	1.04657	1.09088	0.532625	0.336635	0.61166	0.21349	N	0.139009	0.215618	N	4	2.63326	0.0491856	0.00543625	0.0228038	-0.0460242	-0.00925756	-0.132642	-0.206957	-0.136117	-0.0418654
6755100	P50580	Proliferation-associated protein 2G4 (IRES-specific cellular trans-acting factor 45 kDa) (ITAF45) (Mpp1) (Proliferation-associated protein 1) (Protein p38-2G4)	Pa2g4	0.064831	1.04596	0.4591	0.409683	0.670003	0.694944	0.15805	N	0.22753	0.238589	N	4	2.63326	0.0491856	0.0299118	0.0375631	0.406072	0.36288	0.688875	0.611957	0.359664	0.291713
13385560	Q9CQY6	Ubiquinol-cytochrome-c reductase complex assembly factor 2 (Mitochondrial nucleoid factor 1) (Mitochondrial protein M19)	Uqcc2	0.0637317	1.04517	0.441128	0.398293	0.681916	0.702921	0.153093	N	0.230421	0.240112	N	4	2.63326	0.0491856	0.0313093	0.0384058	0.393726	0.352352	0.501886	0.627033	0.20938	0.220356
170784813	Q9EPU0	Regulator of nonsense transcripts 1 (EC 3.6.4.-) (ATP-dependent helicase RENT1) (Nonsense mRNA reducing factor 1) (NORF1) (Up-frameshift suppressor 1 homolog) (mUpf1)	Upf1	0.06216	1.04403	0.337285	0.339624	0.752858	0.744638	0.128055	N	0.248448	0.25014	N	4	2.63326	0.0491856	0.0509471	0.0502479	-2.12123	-1.82094	-1.73617	-2.16141	-2.02195	-1.68146
755506253	UPI0003D6E392	talin-1 isoform X1	Tln1	0.0620647	1.04396	0.333792	0.337262	0.755302	0.746339	0.127064	N	0.249012	0.25021	N	4	2.63326	0.0491856	0.0518594	0.050798	0.197518	-0.270373	-0.394939	-0.255061	-0.270979	-0.127948
1039781739	UPI0007EC6761	cadherin-13 isoform X2	Cdh13	0.0620625	1.04396	0.425738	0.386147	0.692207	0.711473	0.147841	N	0.233201	0.242078	N	4	2.63326	0.0491856	0.0318761	0.0387476	-0.0436237	0.0827716	-0.178882	-0.0300788	-0.352863	0.0570203
569007628	E9Q616	AHNAK nucleoprotein (desmoyokin)	Ahnak	0.0618083	1.04377	1.06023	0.503548	0.348816	0.630865	0.200064	N	0.142091	0.221249	N	4	2.63326	0.0491856	0.00509786	0.0225998	0.688292	0.854964	0.674883	0.687987	0.665321	0.679406
23346595	Q8R404	MICOS complex subunit MIC13	Mic13	0.0588463	1.04163	0.370743	0.350366	0.729628	0.736925	0.132577	N	0.242911	0.24827	N	4	2.63326	0.0491856	0.0377907	0.0423142	0.862867	0.78125	0.711661	0.718122	0.994759	0.466358
568958767	P23927	Alpha-crystallin B chain (Alpha(B)-crystallin) (P23)	Cryab	0.0560347	1.0396	0.157586	0.187552	0.882418	0.856835	0.0671029	N	0.27872	0.276685	N	4	2.63326	0.0491856	0.189658	0.133893	1.2862	0.440832	0.278701	0.951152	0.468911	0.417566
568931972	UPI0003D6FEF8	filamin-binding LIM protein 1 isoform X1	Fblim1	0.0551554	1.03897	0.348557	0.328933	0.744994	0.752346	0.123582	N	0.246741	0.250998	N	4	2.63326	0.0491856	0.0375595	0.0421748	0.410463	0.0577973	0.161634	0.270515	-0.082579	0.276492
18250296	Q8BP67	60S ribosomal protein L24	Rpl24	0.0538763	1.03805	0.187623	0.215093	0.860305	0.836158	0.0777118	N	0.273777	0.270264	N	4	2.63326	0.0491856	0.123685	0.0941102	0.0402369	0.57776	0.649366	0.404833	0.7186	-0.0176991
22550094	Q8K1M3	Protein kinase, cAMP dependent regulatory, type II alpha (Protein kinase, cAMP dependent regulatory, type II alpha, isoform CRA_b) (cAMP-dependent protein kinase type II-alpha regulatory chain) (cAMP-dependent protein kinase type II-alpha regulatory subunit)	Prkar2a	0.0526045	1.03714	0.602377	0.396343	0.579405	0.704291	0.152248	N	0.205193	0.240112	N	4	2.63326	0.0491856	0.0114393	0.0264238	0.0231816	0.167889	0.0578618	0.047407	0.152059	-0.108347
240120058	Q9CR99	RIKEN cDNA 4930544G11 (RIKEN cDNA 4930544G11 gene)	4930544G11Rik	0.051538	1.03637	0.113813	0.139409	0.91487	0.893265	0.0490199	N	0.284724	0.283609	N	4	2.63326	0.0491856	0.307583	0.205005	0.134407	-0.580097	-0.619545	0.328139	-0.947721	-0.600267
9789937	Q9QYJ0	DnaJ homolog subfamily A member 2 (mDj3)	Dnaja2	0.0500123	1.03527	0.742335	0.398455	0.49911	0.702807	0.153164	N	0.184066	0.240112	N	4	2.63326	0.0491856	0.00680841	0.0236313	-0.232962	-0.386082	-0.420034	-0.43942	-0.422749	-0.326946
6755004	Q9Z0X1	Apoptosis-inducing factor 1, mitochondrial (EC 1.1.1.-) (Programmed cell death protein 8)	Aifm1	0.0483997	1.03412	0.209666	0.227777	0.844174	0.826681	0.0826623	N	0.270327	0.267706	N	4	2.63326	0.0491856	0.0799319	0.0677263	-0.188545	0.334864	0.242173	-0.241394	0.304409	0.180278
16716589	P62900	60S ribosomal protein L31	Rpl31	0.0483499	1.03408	0.12178	0.147076	0.908946	0.887442	0.05186	N	0.283401	0.283097	N	4	2.63326	0.0491856	0.236444	0.162107	0.656509	0.830475	0.95572	0.853874	1.3886	0.0551803
21312044	Q9DBZ5	Eukaryotic translation initiation factor 3 subunit K (eIF3k) (Eukaryotic translation initiation factor 3 subunit 12) (eIF-3 p25)	Eif3k	0.047912	1.03377	0.354417	0.30903	0.740922	0.766778	0.115331	N	0.245705	0.254076	N	4	2.63326	0.0491856	0.0274127	0.0360561	-0.605442	-0.576849	-0.38624	-0.568092	-0.773632	-0.370543
71896543	Q4ACU6	SH3 and multiple ankyrin repeat domains protein 3 (Shank3) (Proline-rich synapse-associated protein 2) (ProSAP2) (SPANK-2)	Shank3	0.04622	1.03256	0.129016	0.153716	0.903572	0.882405	0.0543321	N	0.28235	0.282279	N	4	2.63326	0.0491856	0.192515	0.135616	-1.95062	-1.97955	-2.19736	-2.57645	-1.41078	-2.27896
50363232	Q6P5H2	Nestin	Nes	0.0437487	1.03079	0.267783	0.256405	0.802108	0.805408	0.0939843	N	0.260391	0.263357	N	4	2.63326	0.0491856	0.0400365	0.0436685	-0.495175	-0.641916	-0.370252	-0.33887	-0.478556	-0.821163
568992908	O70194	Eukaryotic translation initiation factor 3 subunit D (eIF3d) (Eukaryotic translation initiation factor 3 subunit 7) (eIF-3-zeta) (eIF3 p66)	Eif3d	0.0435027	1.03061	0.262084	0.25272	0.8062	0.808136	0.0925154	N	0.261469	0.263539	N	4	2.63326	0.0491856	0.0413279	0.0444473	-0.873033	-0.694505	-0.391991	-0.52683	-0.738153	-0.825054
6753494	Q9WUM3	Coronin-1B (Coronin-2)	Coro1b	0.0419283	1.02949	0.484852	0.316708	0.653137	0.761198	0.118502	N	0.223595	0.253208	N	4	2.63326	0.0491856	0.0112173	0.0262899	-0.684573	-0.553237	-0.624473	-0.640763	-0.806887	-0.540418
13195604	P62267	40S ribosomal protein S23	Rps23	0.0414937	1.02918	0.253211	0.24278	0.812587	0.815511	0.0885704	N	0.263037	0.26484	N	4	2.63326	0.0491856	0.0402802	0.0438155	0.699803	0.869133	0.993863	0.938192	0.96681	0.533316
146219837	P23116	Eukaryotic translation initiation factor 3 subunit A (eIF3a) (Centrosomin) (Eukaryotic translation initiation factor 3 subunit 10) (eIF-3-theta) (eIF3 p167) (eIF3 p180) (eIF3 p185) (p162)	Eif3a	0.0408854	1.02875	0.528059	0.317026	0.625396	0.760967	0.118634	N	0.216947	0.253208	N	4	2.63326	0.0491856	0.00899216	0.0249481	0.129097	0.0931549	0.196892	0.150119	0.188234	-0.0418654
755500251	UPI0005ABA50F	ubiquinol-cytochrome-c reductase complex assembly factor 1 isoform c;ubiquinol-cytochrome-c reductase complex assembly factor 1 isoform X1	Uqcc1	0.0399763	1.0281	0.495752	0.307163	0.646071	0.768137	0.114562	N	0.221848	0.254281	N	4	2.63326	0.0491856	0.00975367	0.0254073	-1.04885	-0.897259	-0.908449	-0.890003	-1.1104	-0.974084
6679567	O54724	Caveolae-associated protein 1 (Cav-p60) (Cavin-1) (Polymerase I and transcript release factor)	Cavin1	0.0392847	1.0276	0.0897409	0.109558	0.932807	0.916	0.0381045	N	0.28898	0.288096	N	4	2.63326	0.0491856	0.287446	0.192862	0.578045	1.45387	1.25398	0.381771	1.54574	1.24053
6755965	Q60930	Voltage-dependent anion-selective channel protein 2 (VDAC-2) (mVDAC2) (Outer mitochondrial membrane protein porin 2) (Voltage-dependent anion-selective channel protein 6) (VDAC-6) (mVDAC6)	Vdac2	0.0357309	1.02508	0.18007	0.186361	0.865852	0.857732	0.0666484	N	0.275283	0.276714	N	4	2.63326	0.0491856	0.0590603	0.0551403	-0.0321682	0.146195	-0.061907	-0.392475	0.146785	0.190617
755558722	UPI0005ABAF98	perilipin-4 isoform X4	Plin4	0.0352677	1.02475	0.13611	0.152471	0.898309	0.883349	0.0538677	N	0.281639	0.282318	N	4	2.63326	0.0491856	0.100708	0.0802547	0.921786	1.26933	0.71303	0.537803	1.05653	1.20401
10048460	Q9R069	Basal cell adhesion molecule (B-CAM cell surface glycoprotein) (Lutheran antigen) (CD antigen CD239)	Bcam	0.0339178	1.02379	0.443645	0.263716	0.68024	0.800002	0.0969088	N	0.230085	0.262293	N	4	2.63326	0.0491856	0.00876746	0.0248126	-0.0563021	-0.0874212	-0.184208	-0.275306	-0.0757105	-0.0786681
1039735522	P83917	Chromobox protein homolog 1 (Heterochromatin protein 1 homolog beta) (HP1 beta) (Heterochromatin protein p25) (M31) (Modifier 1 protein)	Cbx1	0.0337938	1.0237	0.155362	0.165791	0.884061	0.873261	0.0588561	N	0.278979	0.280402	N	4	2.63326	0.0491856	0.0709701	0.0623221	-0.318943	0.326182	0.216335	-0.0725412	-0.0174721	0.212206
19527310	Q99KR7	Peptidyl-prolyl cis-trans isomerase F, mitochondrial (PPIase F) (EC 5.2.1.8) (Cyclophilin D) (CyP-D) (CypD) (Cyclophilin F) (Rotamase F)	Ppif	0.030242	1.02118	0.124888	0.137496	0.906637	0.894718	0.0483136	N	0.282942	0.283609	N	4	2.63326	0.0491856	0.0879567	0.0725654	0.434265	1.07694	0.822607	0.439863	0.892203	0.91102
28201978	Q8BKZ9	Pyruvate dehydrogenase protein X component, mitochondrial (Dihydrolipoamide dehydrogenase-binding protein of pyruvate dehydrogenase complex) (Lipoyl-containing pyruvate dehydrogenase complex component X)	Pdhx	0.0296394	1.02076	0.0748636	0.0903832	0.943918	0.930651	0.0312132	N	0.291357	0.291715	N	4	2.63326	0.0491856	0.23512	0.161308	-0.0943429	0.203495	-0.133258	-0.74912	0.0799588	0.556137
568968292	Q8CH18	Cell division cycle and apoptosis regulator protein 1 (Cell cycle and apoptosis regulatory protein 1) (CARP-1)	Ccar1	0.0294877	1.02065	0.0572385	0.0708829	0.9571	0.94558	0.0243016	N	0.294621	0.294589	N	4	2.63326	0.0491856	0.398103	0.259591	-0.655825	-1.08918	-1.2071	-1.13183	-0.116848	-1.79189
15042947	O55142	60S ribosomal protein L35a	Rpl35a	0.0275446	1.01928	0.169748	0.162041	0.873447	0.876098	0.0574472	N	0.277084	0.280787	N	4	2.63326	0.0491856	0.0394961	0.0433426	-0.036446	0.180144	0.469033	0.138026	0.312473	0.0795981
31542413	Q9WUM4	Coronin-1C (Coronin-3)	Coro1c	0.026976	1.01887	0.174468	0.162868	0.869972	0.875472	0.0577577	N	0.276334	0.280787	N	4	2.63326	0.0491856	0.0358602	0.0411501	-0.0139497	-0.203137	-0.362845	0.00319144	-0.270713	-0.393338
1039749028	Q9JMK2	Casein kinase I isoform epsilon (CKI-epsilon) (CKIe) (EC 2.7.11.1)	Csnk1e	0.02409	1.01684	0.128589	0.1303	0.903889	0.900192	0.0456648	N	0.28235	0.284583	N	4	2.63326	0.0491856	0.0526449	0.0512716	-1.63798	-1.79677	-1.87674	-1.53514	-1.72422	-2.1244
20982845	P56959	RNA-binding protein FUS (Protein pigpen)	Fus	0.0210163	1.01467	0.298067	0.166071	0.780493	0.873049	0.0589614	N	0.255824	0.280402	N	4	2.63326	0.0491856	0.00745723	0.0240225	0.558429	0.661289	0.786003	0.666713	0.678624	0.597335
160333783	Q9JKS5	Intracellular hyaluronan-binding protein 4 (IHABP-4) (IHABP4) (Hyaluronic acid-binding protein 4)	Habp4	0.0161867	1.01128	0.0799812	0.0833482	0.940094	0.936034	0.0287085	N	0.290706	0.292599	N	4	2.63326	0.0491856	0.0614371	0.0565735	-2.01998	-1.88863	-1.56959	-1.58253	-1.83561	-2.10862
927442713	P0DP26	Calmodulin-1	Calm1	0.0157758	1.01099	0.197059	0.121418	0.853389	0.906956	0.0424138	N	0.272348	0.286122	N	4	2.63326	0.0491856	0.00961346	0.0253228	-0.101119	-0.0556585	-0.0317127	-0.035547	0.0286804	-0.228951
13385472	Q9CR57	60S ribosomal protein L14	Rpl14	0.015596	1.01087	0.105786	0.096492	0.920845	0.92598	0.0333984	N	0.286321	0.290517	N	4	2.63326	0.0491856	0.0326034	0.0391862	0.257285	0.193074	0.245965	-0.0622729	0.280133	0.431676
116256518	Q60668	Heterogeneous nuclear ribonucleoprotein D0 (hnRNP D0) (AU-rich element RNA-binding protein 1)	Hnrnpd	0.0154747	1.01078	0.0849055	0.0851232	0.936416	0.934675	0.0293392	N	0.289833	0.292487	N	4	2.63326	0.0491856	0.0498267	0.0495722	0.49141	0.721333	0.740708	0.324822	0.701944	0.880261
568956312	UPI0003D73854	nuclear factor 1 X-type isoform X5	Nfix	0.0152233	1.01061	0.231212	0.121762	0.828495	0.906693	0.0425396	N	0.26742	0.286122	N	4	2.63326	0.0491856	0.00650262	0.0234469	-1.27521	-1.30333	-1.10726	-1.29178	-1.21351	-1.22618
31981515	P14148	60S ribosomal protein L7	Rpl7	0.0144967	1.0101	0.141986	0.104341	0.893955	0.919983	0.0362201	N	0.280861	0.288901	N	4	2.63326	0.0491856	0.0156364	0.0289547	0.732172	0.756754	0.943618	0.839245	0.903438	0.646371
6677905	Q61543	Golgi apparatus protein 1 (E-selectin ligand 1) (ESL-1) (Selel) (Golgi sialoglycoprotein MG-160)	Glg1	0.0127417	1.00887	0.0731052	0.0719793	0.945232	0.94474	0.0246876	N	0.291497	0.294589	N	4	2.63326	0.0491856	0.0455666	0.0470033	-0.825493	-1.06341	-1.01173	-0.667038	-1.08908	-1.18274
568984368	UPI0003D700A3	28S ribosomal protein S27, mitochondrial isoform X1	Mrps27	0.009566	1.00665	0.0386303	0.0427828	0.971036	0.967134	0.0145134	N	0.296754	0.299973	N	4	2.63326	0.0491856	0.0919805	0.0749919	0.483609	0.914944	0.796827	0.2992	0.925844	0.941638
21426893	P43276	Histone H1.5 (H1 VAR.5) (H1b)	Hist1h1b	0.00917033	1.00638	0.0322624	0.0369072	0.975808	0.971645	0.0124924	N	0.297676	0.300438	N	4	2.63326	0.0491856	0.12119	0.092606	0.606598	0.631782	0.585756	0.145294	0.529781	1.12155
227116347	Q08857	Platelet glycoprotein 4 (Glycoprotein IIIb) (GPIIIB) (PAS IV) (PAS-4) (Platelet glycoprotein IV) (GPIV) (CD antigen CD36)	Cd36	0.00875933	1.00609	0.0427188	0.044717	0.967973	0.965649	0.0151807	N	0.296621	0.299973	N	4	2.63326	0.0491856	0.0630659	0.0575558	1.62256	1.20163	0.985388	1.09572	1.31868	1.3689
568969858	UPI0003D76090	RNA-binding protein EWS isoform X1	Ewsr1	0.00527333	1.00366	0.0555097	0.0388132	0.958394	0.970181	0.013147	N	0.294751	0.300257	N	4	2.63326	0.0491856	0.0135371	0.0276888	1.39891	1.24696	1.37899	1.49921	1.23591	1.27392
568926020	Q6PFA2	Clathrin light chain	Clta	0.00297325	1.00206	0.0637296	0.0248379	0.952243	0.980915	0.00836869	N	0.293392	0.301941	N	4	2.63326	0.0491856	0.00326492	0.0214945	0.0268719	0.0426686	0.111826	0.0342251	0.00521564	0.133006
954170005	A0A1W2P7Q9	Myosin light polypeptide 6	Myl6	0.00249883	1.00173	0.0233795	0.0177112	0.982467	0.98639	0.00595128	N	0.299119	0.303081	N	4	2.63326	0.0491856	0.0171354	0.0298586	0.271814	0.0606028	0.0636885	0.207567	0.213192	-0.0321502
126723336	O35129	Prohibitin-2 (B-cell receptor-associated protein BAP37) (Repressor of estrogen receptor activity)	Phb2	0.00133013	1.00092	0.00450201	0.00519107	0.996624	0.996011	0.00173596	N	0.302664	0.305489	N	4	2.63326	0.0491856	0.130939	0.0984846	0.273033	0.603294	0.463141	-0.0821174	0.547906	0.869689
755552003	UPI0003D73D16	elongation factor 1-delta isoform X1	Eef1d	-0.000822607	0.99943	-0.00728162	-0.00571571	0.994539	0.995608	0.00191179	N	0.302301	0.305489	N	4	2.63326	0.0491856	0.0191434	0.0310695	0.00240488	0.0931549	0.329583	0.0810536	0.090081	0.256476
21728376	Q3THE2	Myosin regulatory light chain 12B (Myosin regulatory light chain 2-B, smooth muscle isoform) (Myosin regulatory light chain 20 kDa) (MLC20) (Myosin regulatory light chain MRLC2)	Myl12b	-0.003423	0.99763	-0.0244788	-0.0217323	0.981643	0.983301	0.00731367	N	0.299119	0.302403	N	4	2.63326	0.0491856	0.0293309	0.0372128	0.802106	0.808812	0.527797	0.878388	0.750425	0.520171
31980808	Q9Z1D1	Eukaryotic translation initiation factor 3 subunit G (eIF3g) (Eukaryotic translation initiation factor 3 RNA-binding subunit) (eIF-3 RNA-binding subunit) (Eukaryotic translation initiation factor 3 subunit 4) (eIF-3-delta) (eIF3 p42) (eIF3 p44)	Eif3g	-0.00389433	0.997304	-0.0978396	-0.0329456	0.926766	0.974687	0.0111347	N	0.287371	0.300564	N	4	2.63326	0.0491856	0.00237645	0.0209587	-0.976837	-1.08657	-1.00445	-1.0319	-1.04908	-0.975194
51093840	Q8QZY1	Eukaryotic translation initiation factor 3 subunit L (eIF3l) (66 kDa tyrosine-rich heat shock protein) (67 kDa polymerase-associated factor) (Eukaryotic translation initiation factor 3 subunit 6-interacting protein) (Eukaryotic translation initiation factor 3 subunit E-interacting protein) (HSP-66Y) (PAF67)	Eif3l	-0.00450477	0.996882	-0.0524622	-0.0340887	0.960676	0.973809	0.011526	N	0.294918	0.300564	N	4	2.63326	0.0491856	0.0110597	0.0261949	0.147401	0.11431	0.303843	0.277885	0.231025	0.0701583
755532685	UPI0005AB9BBA	nesprin-1 isoform 4;nesprin-1 isoform X1	Syne1	-0.00494783	0.996576	-0.0412032	-0.0335782	0.969109	0.974201	0.0113513	N	0.2967	0.300564	N	4	2.63326	0.0491856	0.0216301	0.0325691	-0.137537	-0.333398	-0.315217	-0.0526515	-0.345199	-0.373458
70778915	P26041	Moesin (Membrane-organizing extension spike protein)	Msn	-0.00603183	0.995828	-0.0464313	-0.0396062	0.965192	0.969573	0.0134197	N	0.296036	0.300257	N	4	2.63326	0.0491856	0.0253144	0.0347908	-0.0472259	-0.402655	-0.172546	-0.0641344	-0.333272	-0.206925
83699424	P35980	60S ribosomal protein L18	Rpl18	-0.006154	0.995743	-0.0529099	-0.0422909	0.960341	0.967511	0.0143439	N	0.294918	0.299973	N	4	2.63326	0.0491856	0.0202923	0.0317624	0.437342	0.244698	0.454369	0.215261	0.54347	0.39614
33859482	P58252	Elongation factor 2 (EF-2)	Eef2	-0.009505	0.993433	-0.102969	-0.0705421	0.922944	0.945842	0.0241816	N	0.28671	0.294589	N	4	2.63326	0.0491856	0.0127816	0.0272332	-0.497967	-0.249032	-0.210986	-0.294934	-0.284084	-0.350452
83627727	Q8C9H6	Striatin-interacting proteins 2 (Protein FAM40B)	Strip2	-0.0100639	0.993049	-0.141054	-0.079347	0.894646	0.939097	0.0272896	N	0.280861	0.293289	N	4	2.63326	0.0491856	0.00763576	0.0241302	0.103974	-0.0782754	-0.038855	0.0500394	-0.0843311	0.0513269
124339826	P17879	Heat shock 70 kDa protein 1B (Heat shock 70 kDa protein 1) (HSP70.1)	Hspa1b	-0.011321	0.992184	-0.0224215	-0.0277236	0.983186	0.978698	0.00935125	N	0.299119	0.30153	N	4	2.63326	0.0491856	0.382411	0.250128	0.289835	-0.905915	-1.16479	-0.77686	-0.851499	-0.118548
568920401	Q9CQR2	40S ribosomal protein S21	Rps21	-0.0145903	0.989938	-0.160764	-0.108798	0.880072	0.91658	0.0378296	N	0.278238	0.288096	N	4	2.63326	0.0491856	0.0123551	0.026976	-0.512832	-0.722558	-0.575412	-0.539722	-0.507372	-0.719937
568908960	UPI0003D750FE	pleckstrin homology domain-containing family A member 6 isoform X1	Plekha6	-0.0160767	0.988918	-0.165909	-0.117629	0.876276	0.909843	0.0410334	N	0.277297	0.286769	N	4	2.63326	0.0491856	0.0140845	0.0280189	-0.630482	-0.79891	-0.52378	-0.539908	-0.636168	-0.728866
23956084	P50544	Very long-chain specific acyl-CoA dehydrogenase, mitochondrial (EC 1.3.8.9) (MVLCAD) (VLCAD)	Acadvl	-0.0162803	0.988779	-0.0349376	-0.0429088	0.973803	0.967037	0.0145569	N	0.297332	0.299973	N	4	2.63326	0.0491856	0.325708	0.215935	-0.942889	-0.0839728	-0.947086	-1.36205	-0.404495	-0.158562
21312030	Q9D1I2	Caspase recruitment domain-containing protein 19 (Bcl10-interacting CARD protein) (BinCARD)	Card19	-0.0187154	0.987111	-0.0770925	-0.084933	0.942252	0.934821	0.0292716	N	0.291108	0.292487	N	4	2.63326	0.0491856	0.0884027	0.0728344	0.185364	-0.20006	-0.193287	0.302013	-0.0401508	-0.413699
807066386	Q61702	Inter-alpha-trypsin inhibitor heavy chain H1 (ITI heavy chain H1) (ITI-HC1) (Inter-alpha-inhibitor heavy chain 1)	Itih1	-0.0190567	0.986878	-0.223604	-0.144481	0.834021	0.889412	0.0508969	N	0.268948	0.283341	N	4	2.63326	0.0491856	0.010895	0.0260956	-0.641126	-0.658724	-0.831648	-0.762067	-0.739581	-0.57268
568972110	O70310	Glycylpeptide N-tetradecanoyltransferase 1 (EC 2.3.1.97) (Myristoyl-CoA:protein N-myristoyltransferase 1) (NMT 1) (Type I N-myristoyltransferase) (Peptide N-myristoyltransferase 1)	Nmt1	-0.0201516	0.986129	-0.169039	-0.137155	0.87397	0.894978	0.0481878	N	0.277084	0.283609	N	4	2.63326	0.0491856	0.0213176	0.0323806	-0.218704	-0.4978	-0.0949098	-0.24314	-0.256456	-0.251363
163644327	Q8CFQ3	Intron-binding protein aquarius	Aqr	-0.0219033	0.984932	-0.0399689	-0.0497145	0.970033	0.961814	0.0169091	N	0.296715	0.299291	N	4	2.63326	0.0491856	0.450471	0.291169	-1.78181	-2.31011	-2.13755	-2.13752	-1.10581	-2.92043
1039738294	Q9DBG3	AP-2 complex subunit beta (AP105B) (Adaptor protein complex AP-2 subunit beta) (Adaptor-related protein complex 2 subunit beta) (Beta-2-adaptin) (Beta-adaptin) (Clathrin assembly protein complex 2 beta large chain) (Plasma membrane adaptor HA2/AP2 adaptin beta subunit)	Ap2b1	-0.0221259	0.984781	-0.16666	-0.143888	0.875723	0.889862	0.0506773	N	0.277297	0.283341	N	4	2.63326	0.0491856	0.0264382	0.0354684	-0.105328	-0.253839	-0.258572	0.0618166	-0.300118	-0.31306
20149756	Q91VC3	Eukaryotic initiation factor 4A-III (eIF-4A-III) (eIF4A-III) (EC 3.6.4.13) (ATP-dependent RNA helicase DDX48) (ATP-dependent RNA helicase eIF4A-3) (DEAD box protein 48) (Eukaryotic translation initiation factor 4A isoform 3) [Cleaved into: Eukaryotic initiation factor 4A-III, N-terminally processed]	Eif4a3	-0.0236047	0.983772	-0.140577	-0.136238	0.894999	0.895675	0.0478497	N	0.280861	0.283609	N	4	2.63326	0.0491856	0.0422919	0.0450286	-0.713802	-0.208795	-0.282869	-0.399161	-0.467166	-0.268325
568945144	UPI0003D70E2C	60S ribosomal protein L28 isoform X1	Rpl28	-0.0239293	0.98355	-0.212053	-0.166336	0.842433	0.872848	0.0590612	N	0.270327	0.280402	N	4	2.63326	0.0491856	0.0191014	0.0310442	0.949453	0.76702	1.00214	0.906742	1.09206	0.791599
7657558	Q9WUZ7	SH3 domain-binding glutamic acid-rich protein (SH3BGR protein)	Sh3bgr	-0.023957	0.983531	-0.128561	-0.130007	0.90391	0.900415	0.0455573	N	0.28235	0.284583	N	4	2.63326	0.0491856	0.052088	0.0509358	0.460918	0.440705	0.581775	0.197688	0.533176	0.824405
1039789060	UPI0007ED5C89	sorbin and SH3 domain-containing protein 2 isoform X1	Sorbs2	-0.0255333	0.982457	-0.0994022	-0.111114	0.925601	0.914813	0.0386677	N	0.287273	0.28807	N	4	2.63326	0.0491856	0.0989725	0.0792082	0.674143	0.207477	0.15569	0.762376	0.216992	0.134542
31543974	Q9CQV8	14-3-3 protein beta/alpha (Protein kinase C inhibitor protein 1) (KCIP-1) [Cleaved into: 14-3-3 protein beta/alpha, N-terminally processed]	Ywhab	-0.02753	0.981099	-0.145129	-0.147755	0.891628	0.886926	0.0521124	N	0.280844	0.283097	N	4	2.63326	0.0491856	0.0539751	0.0520738	-0.73705	-0.837371	-1.00797	-1.0053	-1.00608	-0.488421
359385696	P63101	14-3-3 protein zeta/delta (Protein kinase C inhibitor protein 1) (KCIP-1) (SEZ-2)	Ywhaz	-0.0275877	0.981059	-0.130522	-0.138012	0.902455	0.894326	0.0485041	N	0.28235	0.283609	N	4	2.63326	0.0491856	0.0670125	0.0599356	-0.238606	-0.136633	-0.250323	-0.437284	-0.33706	0.231545
7305443	P12970	60S ribosomal protein L7a (Surfeit locus protein 3)	Rpl7a	-0.0306933	0.97895	-0.198112	-0.185117	0.852618	0.85867	0.0661739	N	0.272348	0.276756	N	4	2.63326	0.0491856	0.0360045	0.0412371	0.581722	0.51089	0.668322	0.32212	0.748742	0.782152
568911608	UPI0003D70AA7	bifunctional glutamate/proline--tRNA ligase isoform X1	Eprs	-0.0309837	0.978753	-0.151718	-0.158596	0.886754	0.878707	0.056156	N	0.279568	0.281359	N	4	2.63326	0.0491856	0.0625581	0.0572495	0.246537	0.474758	0.734766	0.233562	0.583775	0.731675
18079341	Q91WK2	Eukaryotic translation initiation factor 3 subunit H (eIF3h) (Eukaryotic translation initiation factor 3 subunit 3) (eIF-3-gamma) (eIF3 p40 subunit)	Eif3h	-0.03185	0.978165	-0.488478	-0.255162	0.650781	0.806328	0.0934883	N	0.223014	0.263357	N	4	2.63326	0.0491856	0.00637705	0.0233711	1.07868	1.13216	1.25377	1.19961	1.24794	1.11261
118344452	F8VQC1	Signal recognition particle subunit SRP72	Srp72	-0.0345306	0.976349	-0.35486	-0.252331	0.740614	0.808424	0.0923606	N	0.245705	0.263539	N	4	2.63326	0.0491856	0.0142032	0.0280905	0.173652	-0.0364527	0.14008	0.270763	0.0675894	0.0425187
658132465	E9Q5J9	Tropomyosin alpha-3 chain	Tpm3	-0.0353642	0.975785	-0.582302	-0.286453	0.591607	0.78327	0.106089	N	0.208426	0.258042	N	4	2.63326	0.0491856	0.00553252	0.0228619	-0.152076	-0.207977	-0.203712	-0.256976	-0.0565373	-0.144159
19527256	Q91VR5	ATP-dependent RNA helicase DDX1 (EC 3.6.4.13) (DEAD box protein 1)	Ddx1	-0.0366477	0.974918	-0.414064	-0.275143	0.700067	0.791578	0.101506	N	0.234886	0.260029	N	4	2.63326	0.0491856	0.0117503	0.0266113	0.317347	0.417151	0.425423	0.585485	0.354497	0.329882
165905585	Q9ERG0	LIM domain and actin-binding protein 1 (Epithelial protein lost in neoplasm) (mEPLIN)	Lima1	-0.0389533	0.973361	-0.620472	-0.313958	0.568551	0.763195	0.117365	N	0.202511	0.253511	N	4	2.63326	0.0491856	0.00591203	0.0230907	-1.84559	-1.74257	-1.64748	-1.65482	-1.73671	-1.72725
569000001	UPI0003D6E34C	chloride intracellular channel protein 5 isoform X1	Clic5	-0.040879	0.972063	-0.683447	-0.331851	0.53186	0.750239	0.1248	N	0.193242	0.250998	N	4	2.63326	0.0491856	0.0053664	0.0227617	-0.239397	-0.434443	-0.344706	-0.264919	-0.296808	-0.334182
262118273	Q9D0I9	Arginine--tRNA ligase, cytoplasmic (EC 6.1.1.19) (Arginyl-tRNA synthetase) (ArgRS)	Rars	-0.0422909	0.971112	-0.455817	-0.313412	0.67217	0.763591	0.117139	N	0.228028	0.253511	N	4	2.63326	0.0491856	0.0129123	0.0273121	0.129097	-0.0658904	0.149129	-0.0111016	0.162837	0.187473
51491880	Q9R190	Metastasis-associated protein MTA2 (Metastasis-associated 1-like 1)	Mta2	-0.0430047	0.970631	-0.270206	-0.255673	0.80037	0.805949	0.0936923	N	0.260186	0.263357	N	4	2.63326	0.0491856	0.0379956	0.0424378	-1.23662	-1.38618	-1.27872	-1.28161	-0.981616	-1.50928
31559916	Q8BG05	Heterogeneous nuclear ribonucleoprotein A3 (hnRNP A3)	Hnrnpa3	-0.0454783	0.968968	-0.503555	-0.339582	0.641041	0.744668	0.128037	N	0.220345	0.25014	N	4	2.63326	0.0491856	0.0122351	0.0269037	-0.692355	-0.799437	-0.755043	-0.549692	-0.718381	-0.842327
1031698715	Q9CQ69	Cytochrome b-c1 complex subunit 8 (Complex III subunit 8) (Complex III subunit VIII) (Ubiquinol-cytochrome c reductase complex 9.5 kDa protein) (Ubiquinol-cytochrome c reductase complex ubiquinone-binding protein QP-C)	Uqcrq	-0.0454903	0.96896	-0.594343	-0.35361	0.584268	0.734602	0.133948	N	0.206484	0.248221	N	4	2.63326	0.0491856	0.00878728	0.0248246	0.541208	0.633629	0.463112	0.649562	0.650507	0.474351
126012517	Q3UZG4	Aminoacyl tRNA synthase complex-interacting multifunctional protein 1	Aimp1	-0.0462667	0.968439	-0.48868	-0.340875	0.65065	0.743738	0.12858	N	0.223014	0.25014	N	4	2.63326	0.0491856	0.0134456	0.0276336	-1.1939	-1.42883	-1.1587	-1.13183	-1.27071	-1.24009
7305061	Q62446	Peptidyl-prolyl cis-trans isomerase FKBP3 (PPIase FKBP3) (EC 5.2.1.8) (25 kDa FK506-binding protein) (25 kDa FKBP) (FKBP-25) (FK506-binding protein 3) (FKBP-3) (Immunophilin FKBP25) (Rapamycin-selective 25 kDa immunophilin) (Rotamase)	Fkbp3	-0.0473843	0.967689	-0.338794	-0.300812	0.751803	0.772766	0.111952	N	0.248342	0.255319	N	4	2.63326	0.0491856	0.0293419	0.0372194	0.175167	-0.119499	0.0507494	0.280525	-0.102564	0.0706093
153791464	E9PXC0	Signal recognition particle 54 kDa protein	Srp54b	-0.049323	0.96639	-0.506679	-0.360383	0.639034	0.729762	0.136819	N	0.219877	0.246829	N	4	2.63326	0.0491856	0.0142143	0.0280971	-0.978474	-1.01378	-0.773166	-0.750973	-0.954982	-0.911496
551894829	Q9D2N4	Dystrobrevin alpha (DTN-A) (Alpha-dystrobrevin)	Dtna	-0.0503785	0.965683	-0.662341	-0.392127	0.543967	0.707256	0.150423	N	0.195503	0.240883	N	4	2.63326	0.0491856	0.00867797	0.0247586	-0.0812877	-0.0787832	-0.132642	0.0759915	-0.037713	-0.179856
31981945	P19253	60S ribosomal protein L13a (Transplantation antigen P198) (Tum-P198 antigen)	Rpl13a	-0.0508103	0.965394	-0.217972	-0.237462	0.838119	0.819465	0.0864698	N	0.2695	0.265872	N	4	2.63326	0.0491856	0.0815067	0.0686759	0.149171	0.324225	0.589489	0.601426	0.598422	0.0154678
568924222	UPI0003D73AC8	ubiquitin-associated protein 2-like isoform X1	Ubap2l	-0.051157	0.965162	-0.663747	-0.397065	0.543154	0.703784	0.152561	N	0.195418	0.240112	N	4	2.63326	0.0491856	0.00891038	0.0248988	-0.309237	-0.481705	-0.35784	-0.307773	-0.246401	-0.441137
31560517	P14115	60S ribosomal protein L27a (L29)	Rpl27a	-0.052374	0.964348	-0.4793	-0.368344	0.656752	0.724089	0.140208	N	0.224606	0.245638	N	4	2.63326	0.0491856	0.0179105	0.030326	0.860306	0.858351	0.934053	0.774414	1.13699	0.898428
114205444	Q9JJI8	60S ribosomal protein L38	Rpl38	-0.0533063	0.963725	-0.319964	-0.309031	0.765011	0.766777	0.115331	N	0.251479	0.254076	N	4	2.63326	0.0491856	0.0416338	0.0446317	-0.283676	-0.255342	0.0757031	0.136514	-0.188547	-0.251363
33563250	P31001	Desmin	Des	-0.057161	0.961154	-0.195284	-0.224754	0.854689	0.828936	0.0814788	N	0.272501	0.268183	N	4	2.63326	0.0491856	0.128516	0.0970235	0.819999	0.156128	0.295187	0.901223	0.315136	0.226438
29789144	Q8CC27	Voltage-dependent L-type calcium channel subunit beta-2 (CAB2) (Calcium channel voltage-dependent subunit beta 2)	Cacnb2	-0.0580867	0.960537	-0.115354	-0.142602	0.913724	0.890839	0.0502007	N	0.284629	0.283388	N	4	2.63326	0.0491856	0.380347	0.248883	-2.802	-2.28496	-2.56099	-3.44629	-2.11196	-1.91544
568933637	UPI0003D70536	alpha-adducin isoform 6;alpha-adducin isoform X3	Add1	-0.0583013	0.960394	-0.799081	-0.457676	0.469003	0.661798	0.179275	N	0.175685	0.229744	N	4	2.63326	0.0491856	0.00798484	0.0243407	-0.821878	-0.759628	-0.746508	-0.739216	-0.58862	-0.825274
27369581	Q8BH59	Calcium-binding mitochondrial carrier protein Aralar1 (Mitochondrial aspartate glutamate carrier 1) (Solute carrier family 25 member 12)	Slc25a12	-0.0613363	0.958376	-0.73971	-0.468186	0.500537	0.654644	0.183995	N	0.184355	0.227491	N	4	2.63326	0.0491856	0.0103134	0.0257449	0.185435	0.0127875	-0.0191526	0.161315	0.186296	0.0154678
6671565	O54774	AP-3 complex subunit delta-1 (AP-3 complex subunit delta) (Adaptor-related protein complex 3 subunit delta-1) (Delta-adaptin) (mBLVR1)	Ap3d1	-0.06144	0.958307	-0.27404	-0.295164	0.797623	0.776892	0.10964	N	0.259681	0.256188	N	4	2.63326	0.0491856	0.0753991	0.0649929	-2.90276	-2.67774	-2.50828	-2.93646	-2.69232	-2.27568
31980922	O70251	Elongation factor 1-beta (EF-1-beta)	Eef1b	-0.0641667	0.956498	-0.757361	-0.487208	0.490998	0.641796	0.192603	N	0.182665	0.223778	N	4	2.63326	0.0491856	0.0107673	0.0260185	-0.0955385	-0.201259	-0.088727	0.0238824	-0.216693	-0.000213653
34486094	Q62448	Eukaryotic translation initiation factor 4 gamma 2 (eIF-4-gamma 2) (eIF-4G 2) (eIF4G 2) (Novel APOBEC-1 target 1) (Translation repressor NAT1) (p97)	Eif4g2	-0.0654767	0.95563	-0.208975	-0.243651	0.844679	0.814864	0.0889149	N	0.270327	0.26484	N	4	2.63326	0.0491856	0.147257	0.108325	-2.51295	-2.52581	-1.96511	-1.88476	-2.74639	-2.17629
365906249	Q66JS6	Eukaryotic translation initiation factor 3 subunit J-B (eIF3j-B) (Eukaryotic translation initiation factor 3 subunit 1-B) (eIF-3-alpha-B) (eIF3 p35)	Eif3j2	-0.066463	0.954976	-0.539629	-0.446427	0.61809	0.669497	0.174251	N	0.215385	0.231291	N	4	2.63326	0.0491856	0.0227542	0.0332469	-0.452507	-0.527671	-0.281229	-0.550838	-0.277905	-0.233275
13385872	Q9CXY6	Interleukin enhancer-binding factor 2 (Nuclear factor of activated T-cells 45 kDa)	Ilf2	-0.0675637	0.954248	-1.28405	-0.55751	0.268453	0.595482	0.225132	N	0.119715	0.21144	N	4	2.63326	0.0491856	0.00415291	0.0220299	0.190862	0.211193	0.21378	0.221795	0.377067	0.219664
568931994	UPI0003D72EEB	heterogeneous nuclear ribonucleoprotein R isoform X1	Hnrnpr	-0.06814	0.953867	-0.415753	-0.398655	0.698927	0.702667	0.153251	N	0.234765	0.240112	N	4	2.63326	0.0491856	0.0402925	0.0438229	0.586593	0.5529	0.715082	0.825579	0.859026	0.37439
568978634	UPI0003D791A1	alpha-actinin-1 isoform X4	Actn1	-0.0694521	0.953	-0.452338	-0.420859	0.674472	0.687156	0.162944	N	0.228361	0.236627	N	4	2.63326	0.0491856	0.035362	0.0408497	0.198675	-0.0633257	-0.209688	0.230528	-0.0931192	-0.00339127
6755224	Q9Z0P5	Twinfilin-2 (A6-related protein) (mA6RP) (Twinfilin-1-like protein)	Twf2	-0.0706988	0.952177	-0.60813	-0.485937	0.575939	0.642651	0.192025	N	0.204393	0.223778	N	4	2.63326	0.0491856	0.0202732	0.0317508	-0.316043	-0.381735	-0.299342	-0.464039	-0.249575	-0.0714097
110431378	E9Q6R7	Utrophin	Utrn	-0.0733273	0.950443	-1.05694	-0.581166	0.350147	0.580329	0.236326	N	0.142462	0.208657	N	4	2.63326	0.0491856	0.00721982	0.0238793	-0.393725	-0.4882	-0.298057	-0.351171	-0.372768	-0.236061
6753620	Q62167	ATP-dependent RNA helicase DDX3X (EC 3.6.4.13) (D1Pas1-related sequence 2) (DEAD box RNA helicase DEAD3) (mDEAD3) (DEAD box protein 3, X-chromosomal) (Embryonic RNA helicase)	Ddx3x	-0.0765117	0.948348	-0.818647	-0.565831	0.458955	0.590126	0.229055	N	0.173409	0.210411	N	4	2.63326	0.0491856	0.0131025	0.0274267	-0.206401	-0.446419	-0.363194	-0.309213	-0.140189	-0.337077
355390366	A0A087WNZ5	Lymphocyte antigen 6C1	Ly6c1	-0.076764	0.948182	-0.221011	-0.262121	0.835908	0.801181	0.0962696	N	0.269044	0.262427	N	4	2.63326	0.0491856	0.180959	0.128648	-0.257844	-0.45885	-1.0525	-1.0174	-0.241727	-0.279775
47271535	Q8BMA6	Signal recognition particle subunit SRP68 (SRP68) (Signal recognition particle 68 kDa protein)	Srp68	-0.079384	0.946462	-0.255029	-0.296994	0.811276	0.775554	0.110388	N	0.262864	0.255993	N	4	2.63326	0.0491856	0.145337	0.107167	0.199719	-0.561019	-0.554865	-0.49713	-0.30064	0.119757
568961237	UPI000333D27C	tropomyosin alpha-1 chain isoform X18;tropomyosin alpha-1 chain isoform X12;tropomyosin alpha-1 chain isoform X18;tropomyosin alpha-4 chain isoform X2;tropomyosin alpha-1 chain isoform X16;tropomyosin alpha-1 chain isoform X18;tropomyosin alpha-1 chain isoform X7;tropomyosin alpha-1 chain isoform X13;tropomyosin alpha-4 chain isoform X8;tropomyosin alpha-1 chain isoform X10;tropomyosin alpha-1 ch…	Tpm1	-0.0823543	0.944515	-0.738893	-0.575074	0.500982	0.58421	0.233431	N	0.184355	0.209097	N	4	2.63326	0.0491856	0.0186338	0.0307622	-0.544726	-0.452124	-0.583795	-0.365487	-0.316689	-0.651406
54020676	Q8BJW6	Eukaryotic translation initiation factor 2A (eIF-2A) [Cleaved into: Eukaryotic translation initiation factor 2A, N-terminally processed]	Eif2a	-0.0825573	0.944382	-0.818817	-0.596627	0.458868	0.570548	0.243708	N	0.173409	0.205572	N	4	2.63326	0.0491856	0.0152486	0.0287208	0.983216	0.69059	0.937876	1.03887	0.92351	0.896974
166197652	Q9CZA6	Nuclear distribution protein nudE homolog 1 (NudE) (mNudE)	Nde1	-0.0829433	0.94413	-0.651873	-0.549549	0.550043	0.60063	0.221393	N	0.197269	0.212606	N	4	2.63326	0.0491856	0.0242844	0.0341697	-2.05688	-2.18667	-2.26948	-2.13231	-1.87722	-2.25467
568994402	UPI0003D6E50D	sarcalumenin isoform X1	Srl	-0.0830247	0.944076	-0.286345	-0.328924	0.788832	0.752353	0.123578	N	0.258059	0.250998	N	4	2.63326	0.0491856	0.126103	0.0955686	-0.342463	0.465251	0.232533	-0.123556	0.374657	0.353294
568923537	UPI00001F04B8	tropomyosin alpha-3 chain isoform X1	Tpm3	-0.0830597	0.944053	-1.54359	-0.683599	0.197563	0.517386	0.286185	N	0.0985571	0.191586	N	4	2.63326	0.0491856	0.00434316	0.0221447	0.76356	0.598965	0.667138	0.715412	0.762181	0.801249
568990621	UPI00001E951E	protein LYRIC isoform X1	Mtdh	-0.0832927	0.943901	-1.17619	-0.657641	0.30474	0.532916	0.273341	N	0.130127	0.194885	N	4	2.63326	0.0491856	0.0075223	0.0240617	-0.472726	-0.256765	-0.271207	-0.232828	-0.27449	-0.243502
126517469	Q9Z2D6	Methyl-CpG-binding protein 2 (MeCp-2 protein) (MeCp2)	Mecp2	-0.0859537	0.942162	-0.67218	-0.568278	0.538299	0.588556	0.230212	N	0.194705	0.210097	N	4	2.63326	0.0491856	0.0245273	0.0343161	0.326654	0.186623	0.292507	0.540255	0.39533	0.12806
568908290	UPI0003D78EF8	leucine-rich repeat flightless-interacting protein 1 isoform X27	Lrrfip1	-0.0866653	0.941697	-0.580683	-0.532892	0.592598	0.611485	0.213614	N	0.208558	0.215618	N	4	2.63326	0.0491856	0.0334121	0.0396738	-0.450821	-0.905155	-0.73027	-0.473528	-0.651981	-0.700741
568928993	Q569Z6	Thyroid hormone receptor-associated protein 3 (Thyroid hormone receptor-associated protein complex 150 kDa component) (Trap150)	Thrap3	-0.087069	0.941433	-1.8481	-0.726697	0.138294	0.492252	0.307813	N	0.082905	0.185157	N	4	2.63326	0.0491856	0.00332941	0.0215333	-0.59154	-0.671145	-0.508488	-0.502572	-0.497133	-0.510261
569000056	S4R1M2	Scaffold attachment factor B1	Safb	-0.08814	0.940735	-0.836281	-0.627724	0.450045	0.551172	0.258713	N	0.170613	0.200277	N	4	2.63326	0.0491856	0.0166622	0.0295733	-0.354204	-0.437104	-0.116741	-0.301506	-0.172953	-0.16917
568964374	Q9D1G3	Protein-cysteine N-palmitoyltransferase HHAT-like protein (Glycerol uptake/transporter homolog) (Hedgehog acyltransferase-like protein)	Hhatl	-0.09153	0.938527	-0.360382	-0.401712	0.736786	0.700522	0.154578	N	0.244813	0.240022	N	4	2.63326	0.0491856	0.096759	0.0778734	-1.60811	-1.45803	-1.35726	-1.68384	-0.90131	-1.56366
161484654	P02463	Collagen alpha-1(IV) chain [Cleaved into: Arresten]	Col4a1	-0.091541	0.93852	-0.281769	-0.330613	0.792097	0.751133	0.124283	N	0.258378	0.250998	N	4	2.63326	0.0491856	0.15832	0.114996	0.351489	0.293539	0.247855	0.961254	0.364814	-0.158562
31560385	Q9CQM8	60S ribosomal protein L21 (MCG120646) (MCG121646, isoform CRA_a) (MCG121688) (MCG18971) (Ribosomal protein L21) (Rpl21 protein)	Rpl21	-0.092004	0.938219	-0.713	-0.605895	0.515233	0.564731	0.248158	N	0.18878	0.203905	N	4	2.63326	0.0491856	0.0249761	0.0345868	0.487139	0.335615	0.473523	0.71298	0.556805	0.302504
20270267	Q63918	Caveolae-associated protein 2 (Cavin-2) (Phosphatidylserine-binding protein) (Serum deprivation-response protein)	Cavin2	-0.092514	0.937887	-0.282862	-0.332271	0.791317	0.749936	0.124976	N	0.258373	0.250998	N	4	2.63326	0.0491856	0.160457	0.116285	0.477569	0.862377	0.497332	0.19084	1.23719	0.68679
1039788776	A0A0N4SVK8	[Protein ADP-ribosylarginine] hydrolase-like protein 1	Adprhl1	-0.0934783	0.93726	-0.413168	-0.446226	0.700673	0.669635	0.174162	N	0.234886	0.231291	N	4	2.63326	0.0491856	0.0767822	0.065827	-0.207298	-0.693522	-0.665467	-0.109643	-0.535797	-0.640412
22779899	Q6A068	Cell division cycle 5-like protein (Cdc5-like protein)	Cdc5l	-0.0937433	0.937088	-1.53926	-0.759019	0.198576	0.473943	0.324274	N	0.0985571	0.179255	N	4	2.63326	0.0491856	0.0055635	0.0228805	-2.36316	-2.25195	-2.2201	-2.19773	-2.10493	-2.25132
568963982	UPI0003D75EFA	golgin subfamily A member 4 isoform X1	Golga4	-0.0979397	0.934366	-1.97987	-0.813549	0.11882	0.44412	0.3525	N	0.0781748	0.172264	N	4	2.63326	0.0491856	0.0036706	0.0217391	0.18931	0.273687	0.275611	0.287596	0.32227	0.422561
568968343	UPI0000F4986A	SWI/SNF complex subunit SMARCC2 isoform X1	Smarcc2	-0.098769	0.933829	-1.21909	-0.758074	0.289784	0.474472	0.32379	N	0.126324	0.179258	N	4	2.63326	0.0491856	0.00984606	0.025463	0.409334	0.364963	0.396187	0.378408	0.644248	0.444135
77404392	Q78PY7	Staphylococcal nuclease domain-containing protein 1 (100 kDa coactivator) (p100 co-activator)	Snd1	-0.100116	0.932958	-0.944966	-0.711748	0.398183	0.500877	0.300269	N	0.155653	0.187738	N	4	2.63326	0.0491856	0.016837	0.0296787	0.0334318	-0.0166814	0.229792	0.2893	0.21889	0.0387001
568930467	UPI0003D778B8	agrin isoform X1	Agrn	-0.10131	0.932186	-1.10239	-0.752824	0.332159	0.477416	0.321103	N	0.138257	0.180171	N	4	2.63326	0.0491856	0.0126686	0.0271651	-0.321848	-0.146391	-0.406788	-0.0990134	-0.198044	-0.274039
34328400	Q6PDM2	Serine/arginine-rich splicing factor 1 (ASF/SF2) (Pre-mRNA-splicing factor SRp30a) (Splicing factor, arginine/serine-rich 1)	Srsf1	-0.101621	0.931985	-0.466763	-0.498238	0.664959	0.634407	0.197632	N	0.226498	0.222217	N	4	2.63326	0.0491856	0.0710996	0.0624002	-0.277454	-0.183508	-0.171282	-0.508971	0.228338	-0.0467476
170172520	P53395	Lipoamide acyltransferase component of branched-chain alpha-keto acid dehydrogenase complex, mitochondrial (EC 2.3.1.168) (Branched-chain alpha-keto acid dehydrogenase complex component E2) (BCKAD-E2) (BCKADE2) (Dihydrolipoamide acetyltransferase component of branched-chain alpha-keto acid dehydrogenase complex) (Dihydrolipoamide branched chain transacylase) (Dihydrolipoyllysine-residue (2-methyl…	Dbt	-0.102778	0.931238	-0.232176	-0.283765	0.827796	0.785242	0.104996	N	0.26742	0.258443	N	4	2.63326	0.0491856	0.29394	0.196778	-0.143293	0.244661	0.0152503	-0.714417	0.555741	0.583629
281332195	Q99KX1	Myeloid leukemia factor 2 (Myelodysplasia-myeloid leukemia factor 2)	Mlf2	-0.103694	0.930647	-0.282934	-0.338187	0.791266	0.745672	0.127452	N	0.258373	0.25021	N	4	2.63326	0.0491856	0.20148	0.141022	-0.604669	-1.38697	-1.21504	-0.425086	-1.11217	-1.35834
6755478	Q62093	Serine/arginine-rich splicing factor 2 (Protein PR264) (Putative myelin regulatory factor 1) (MRF-1) (Splicing component, 35 kDa) (Splicing factor SC35) (SC-35) (Splicing factor, arginine/serine-rich 2)	Srsf2	-0.107872	0.927956	-0.537195	-0.558294	0.619623	0.594976	0.225501	N	0.215385	0.21144	N	4	2.63326	0.0491856	0.0604843	0.055999	-0.744663	-0.423884	-0.204508	-0.572468	-0.138543	-0.338429
161086984	P62743	AP-2 complex subunit sigma (Adaptor protein complex AP-2 subunit sigma) (Adaptor-related protein complex 2 subunit sigma) (Clathrin assembly protein 2 sigma small chain) (Clathrin coat assembly protein AP17) (Clathrin coat-associated protein AP17) (Plasma membrane adaptor AP-2 17 kDa protein) (Sigma-adaptin 3b) (Sigma2-adaptin)	Ap2s1	-0.108573	0.927505	-0.713931	-0.661202	0.514716	0.530768	0.275095	N	0.18878	0.194515	N	4	2.63326	0.0491856	0.0346916	0.0404454	1.41483	1.31588	1.26849	1.71107	1.40369	1.21016
6677803	P62274	40S ribosomal protein S29	Rps29	-0.108802	0.927358	-1.05407	-0.780309	0.351312	0.462139	0.335227	N	0.142764	0.176547	N	4	2.63326	0.0491856	0.015982	0.0291631	0.165574	0.175645	0.249521	0.121498	0.464239	0.33141
568953118	P70372	ELAV-like protein 1 (Elav-like generic protein) (Hu-antigen R) (HuR) (MelG)	Elavl1	-0.111767	0.925454	-1.09061	-0.80347	0.336737	0.44953	0.347241	N	0.139009	0.173601	N	4	2.63326	0.0491856	0.0157534	0.0290253	-0.160449	-0.480184	-0.399374	-0.286344	-0.16581	-0.252553
31542563	Q91YW3	DnaJ homolog subfamily C member 3 (Interferon-induced, double-stranded RNA-activated protein kinase inhibitor) (Protein kinase inhibitor of 58 kDa) (Protein kinase inhibitor p58)	Dnajc3	-0.113023	0.924648	-0.685138	-0.65886	0.530898	0.53218	0.273941	N	0.193242	0.194824	N	4	2.63326	0.0491856	0.0408199	0.0441409	-2.41535	-2.5988	-2.4055	-2.49238	-2.05602	-2.53218
13385680	Q9CQ62	2,4-dienoyl-CoA reductase, mitochondrial (EC 1.3.1.34) (2,4-dienoyl-CoA reductase [NADPH]) (4-enoyl-CoA reductase [NADPH])	Decr1	-0.114325	0.923815	-0.955199	-0.776887	0.393568	0.464023	0.333461	N	0.154383	0.177069	N	4	2.63326	0.0491856	0.0214874	0.032483	0.825275	1.11653	0.952722	0.913811	1.12793	1.19576
254675181	Q91ZB0	Alpha-protein kinase 2 (EC 2.7.11.-) (Heart alpha-protein kinase)	Alpk2	-0.115203	0.923252	-0.775548	-0.710063	0.481314	0.501855	0.299421	N	0.179456	0.187738	N	4	2.63326	0.0491856	0.0330982	0.0394845	-1.4057	-1.49847	-1.49441	-1.4691	-1.06175	-1.52212
117938324	D3YUT2	Alpha-protein kinase 3	Alpk3	-0.11597	0.922762	-1.40847	-0.886708	0.231768	0.406234	0.391224	N	0.10806	0.161124	N	4	2.63326	0.0491856	0.0101692	0.0256579	-1.14676	-1.38333	-1.28971	-1.06693	-1.19804	-1.20692
568934692	UPI0003D769C4	LIM and calponin homology domains-containing protein 1 isoform X1	Limch1	-0.116147	0.922648	-0.763257	-0.707098	0.487843	0.50358	0.297931	N	0.18169	0.188178	N	4	2.63326	0.0491856	0.0347352	0.0404717	0.0492609	-0.120832	-0.200635	0.287111	-0.0628437	-0.148031
22122819	Q8K3W2	Leucine-rich repeat-containing protein 10 (Heart-restricted leucine-rich repeat protein)	Lrrc10	-0.116479	0.922436	-0.467707	-0.518747	0.664339	0.620786	0.207058	N	0.226498	0.218263	N	4	2.63326	0.0491856	0.0930333	0.0756267	-0.205924	-0.67284	-0.725003	-0.777085	-0.150739	-0.326506
568918746	UPI0003D70E60	cytoskeleton-associated protein 5 isoform X1	Ckap5	-0.116714	0.922286	-1.15168	-0.842084	0.313606	0.429052	0.36749	N	0.132858	0.167841	N	4	2.63326	0.0491856	0.0154054	0.0288154	-0.189908	-0.430479	-0.309038	-0.282961	-0.249575	-0.0467476
33186863	P47963	60S ribosomal protein L13 (A52)	Rpl13	-0.116999	0.922104	-0.679446	-0.665606	0.53414	0.52812	0.277268	N	0.193821	0.19396	N	4	2.63326	0.0491856	0.0444778	0.0463467	0.464579	0.24159	0.507421	0.235077	0.580828	0.748681
165972321	Q6DVA0	LEM domain-containing protein 2 (Nuclear envelope transmembrane protein 25) (NET25)	Lemd2	-0.117524	0.921768	-0.698215	-0.677376	0.523504	0.521082	0.283094	N	0.191262	0.191993	N	4	2.63326	0.0491856	0.0424976	0.0451526	0.246537	-0.126175	-0.0078284	0.347173	-0.086076	0.204008
124487139	Q8VHX6	Filamin-C (FLN-C) (ABP-280-like protein) (ABP-L) (Actin-binding-like protein) (Filamin-2) (Gamma-filamin)	Flnc	-0.1216	0.919167	-0.511905	-0.560638	0.635684	0.593465	0.226605	N	0.21917	0.211381	N	4	2.63326	0.0491856	0.0846411	0.0705661	0.642819	0.221748	0.201777	0.843563	0.213192	0.37439
85060507	Q5EBP8	Heterogeneous nuclear ribonucleoprotein A1	Hnrnpa1	-0.122205	0.918783	-1.62638	-0.953629	0.179195	0.37372	0.427454	N	0.0934344	0.1513	N	4	2.63326	0.0491856	0.00846877	0.0246325	-0.144188	-0.189878	-0.112628	0.0557238	-0.169561	0.0337573
73622267	Q3ULD5	Methylcrotonoyl-CoA carboxylase beta chain, mitochondrial (MCCase subunit beta) (EC 6.4.1.4) (3-methylcrotonyl-CoA carboxylase 2) (3-methylcrotonyl-CoA carboxylase non-biotin-containing subunit) (3-methylcrotonyl-CoA:carbon dioxide ligase subunit beta)	Mccc2	-0.123201	0.918148	-0.221949	-0.276301	0.835225	0.790726	0.101974	N	0.269044	0.259998	N	4	2.63326	0.0491856	0.462185	0.298233	-2.00458	-0.663098	-1.12161	-1.89307	-0.947721	-0.578893
6753738	Q9Z0N1	Eukaryotic translation initiation factor 2 subunit 3, X-linked (Eukaryotic translation initiation factor 2 subunit gamma, X-linked) (eIF-2-gamma X)	Eif2s3x	-0.124119	0.917564	-2.4398	-1.028	0.0712238	0.339969	0.46856	N	0.0622137	0.140711	N	4	2.63326	0.0491856	0.00388201	0.0218666	0.236337	0.25282	0.24556	0.311224	0.325882	0.469967
8393544	Q9Z204	Heterogeneous nuclear ribonucleoproteins C1/C2 (hnRNP C1/C2)	Hnrnpc	-0.125258	0.91684	-0.897153	-0.795843	0.420354	0.453656	0.343274	N	0.162446	0.174083	N	4	2.63326	0.0491856	0.0292396	0.0371577	0.841099	0.743798	0.8881	0.703941	0.984071	1.16076
568940266	UPI0003D71B19	caldesmon isoform X12;caldesmon isoform X4	Cald1	-0.126786	0.915869	-0.776398	-0.74326	0.480866	0.482811	0.316223	N	0.179456	0.182006	N	4	2.63326	0.0491856	0.0400006	0.0436469	0.239655	-0.0865746	-0.199346	0.290029	0.0859293	-0.0418654
70906447	Q8K019	Bcl-2-associated transcription factor 1 (Btf)	Bclaf1	-0.126791	0.915867	-0.666608	-0.679351	0.541504	0.519908	0.284074	N	0.195359	0.191974	N	4	2.63326	0.0491856	0.0542656	0.052249	-0.16752	-0.442094	-0.241166	0.111059	-0.104935	-0.476532
30794400	Q91W69	Epsin-3 (EPS-15-interacting protein 3)	Epn3	-0.127059	0.915696	-0.887089	-0.797423	0.425149	0.452799	0.344094	N	0.163739	0.174083	N	4	2.63326	0.0491856	0.0307727	0.0380822	-1.2465	-0.979345	-1.13669	-1.20584	-0.986699	-0.78882
568991780	Q61550	Double-strand-break repair protein rad21 homolog (Pokeweed agglutinin-binding protein 29) (PW29) (SCC1 homolog)	Rad21	-0.127398	0.915481	-1.8471	-1.01079	0.138454	0.347558	0.458972	N	0.082905	0.14316	N	4	2.63326	0.0491856	0.0071357	0.0238286	-0.561799	-0.65922	-0.592227	-0.567178	-0.507372	-0.356501
11230802	P57780	Alpha-actinin-4 (Non-muscle alpha-actinin 4)	Actn4	-0.128349	0.914878	-0.667487	-0.683003	0.540997	0.517739	0.285889	N	0.195359	0.191586	N	4	2.63326	0.0491856	0.0554612	0.05297	-0.029304	-0.288925	-0.3188	0.212188	-0.372723	-0.0914474
568923878	UPI0003D6E937	nexilin isoform X6;nexilin isoform X3	Nexn	-0.128567	0.914739	-1.12389	-0.889141	0.323945	0.405016	0.392528	N	0.136048	0.161014	N	4	2.63326	0.0491856	0.0196292	0.0313625	-0.10612	0.0617781	0.105999	0.303085	0.166774	-0.0225001
295054166	Q9CPR5	39S ribosomal protein L15, mitochondrial (L15mt) (MRP-L15)	Mrpl15	-0.128618	0.914707	-0.989241	-0.844222	0.378545	0.427938	0.368619	N	0.151113	0.167596	N	4	2.63326	0.0491856	0.0253565	0.0348162	-0.0953425	0.0629883	0.0459694	-0.103859	0.219628	0.2837
806776659	Q6P3A8	2-oxoisovalerate dehydrogenase subunit beta, mitochondrial (EC 1.2.4.4) (Branched-chain alpha-keto acid dehydrogenase E1 component beta chain) (BCKDE1B) (BCKDH E1-beta)	Bckdhb	-0.134201	0.911174	-0.216818	-0.27166	0.83896	0.794143	0.100101	N	0.269514	0.260621	N	4	2.63326	0.0491856	0.574667	0.366062	-0.0635494	1.27266	0.683092	-0.138551	1.5145	0.918858
22122795	Q8R1Q8	Cytoplasmic dynein 1 light intermediate chain 1 (Dynein light chain A) (DLC-A) (Dynein light intermediate chain 1, cytosolic)	Dync1li1	-0.13457	0.910941	-1.20915	-0.940192	0.293187	0.380084	0.42012	N	0.126742	0.15252	N	4	2.63326	0.0491856	0.0185792	0.0307293	0.0185762	-0.274021	0.0550754	0.0886136	0.122871	-0.0081448
20452466	Q544X6	Ferrochelatase (EC 4.99.1.1)	Fech	-0.134831	0.910777	-0.379218	-0.451325	0.723798	0.666139	0.176435	N	0.241682	0.230783	N	4	2.63326	0.0491856	0.189623	0.133872	-0.925105	-0.180726	0.114315	-0.534551	-0.104935	0.052462
120537241	Q8BMJ2	Leucine--tRNA ligase, cytoplasmic (EC 6.1.1.4) (Leucyl-tRNA synthetase) (LeuRS)	Lars	-0.135074	0.910623	-0.520114	-0.582955	0.630443	0.579192	0.237177	N	0.218189	0.208467	N	4	2.63326	0.0491856	0.101167	0.0805315	0.332621	-0.135446	-0.0171205	-0.185617	0.199989	0.570905
100817933	Q8JZN5	Acyl-CoA dehydrogenase family member 9, mitochondrial (ACAD-9) (EC 1.3.99.-)	Acad9	-0.135397	0.910419	-0.513639	-0.57776	0.634574	0.582497	0.234707	N	0.21901	0.208997	N	4	2.63326	0.0491856	0.10423	0.0823783	-0.253677	-0.0454987	-0.0501795	-0.490079	0.274671	0.272243
568965077	UPI00015493F7	microtubule-associated protein 7	Mtap7	-0.135817	0.910154	-0.807553	-0.783174	0.464631	0.460566	0.336708	N	0.175163	0.176143	N	4	2.63326	0.0491856	0.0424283	0.0451108	-2.28955	-2.65056	-2.4298	-2.41551	-2.06132	-2.48563
12963643	Q9EQI8	39S ribosomal protein L46, mitochondrial (L46mt) (MRP-L46)	Mrpl46	-0.136319	0.909838	-0.840027	-0.801912	0.44817	0.450371	0.346429	N	0.170283	0.173601	N	4	2.63326	0.0491856	0.0395016	0.043346	-1.00529	-1.08937	-1.26123	-0.99641	-0.726594	-1.22393
752507732	O54931	A-kinase anchor protein 2 (AKAP-2) (AKAP expressed in kidney and lung) (AKAP-KL) (Protein kinase A-anchoring protein 2) (PRKA2)	Akap2	-0.137467	0.909114	-1.26611	-0.968998	0.27419	0.36654	0.435878	N	0.122112	0.149183	N	4	2.63326	0.0491856	0.0176827	0.0301887	0.123431	0.0808291	0.0409944	0.00801224	0.310343	0.339301
31982032	Q9D1N9	39S ribosomal protein L21, mitochondrial (L21mt) (MRP-L21)	Mrpl21	-0.137557	0.909057	-0.853764	-0.812383	0.441349	0.444744	0.35189	N	0.168447	0.172264	N	4	2.63326	0.0491856	0.0389385	0.0430064	-2.01396	-1.59807	-1.83344	-1.83035	-1.47128	-1.73117
158966704	P14131	40S ribosomal protein S16	Rps16	-0.139522	0.90782	-1.58072	-1.04827	0.189096	0.331201	0.479908	N	0.096349	0.138197	N	4	2.63326	0.0491856	0.011686	0.0265725	0.74771	0.573647	0.79743	0.937727	0.856591	0.743035
160333480	Q8VD26	Transmembrane protein 143	Tmem143	-0.140196	0.907396	-0.61155	-0.663042	0.573885	0.529661	0.276002	N	0.203878	0.194317	N	4	2.63326	0.0491856	0.0788308	0.0670623	-1.29876	-1.40915	-1.41874	-1.47638	-1.44597	-0.783713
1039760198	UPI0007ED765D	plakophilin-4 isoform X9	Pkp4	-0.141287	0.90671	-0.683998	-0.717772	0.531547	0.49739	0.303303	N	0.193242	0.186885	N	4	2.63326	0.0491856	0.0640009	0.0581196	0.352679	-0.156143	-0.259761	0.0738382	0.281006	0.00579169
38142460	Q9DCW4	Electron transfer flavoprotein subunit beta (Beta-ETF)	Etfb	-0.141807	0.906383	-0.476185	-0.549923	0.658786	0.600388	0.221568	N	0.225074	0.212606	N	4	2.63326	0.0491856	0.133025	0.0997425	1.54214	2.22726	1.73139	1.54942	2.11932	2.25747
6755358	P62918	60S ribosomal protein L8	Rpl8	-0.143018	0.905623	-1.10847	-0.941898	0.329816	0.379272	0.421049	N	0.137491	0.152372	N	4	2.63326	0.0491856	0.0249702	0.0345832	0.697359	0.531471	0.594191	0.567802	0.975695	0.708578
18087805	P25444	40S ribosomal protein S2 (40S ribosomal protein S4) (Protein LLRep3)	Rps2	-0.143213	0.9055	-1.98193	-1.12638	0.118539	0.299099	0.524185	N	0.0781748	0.128134	N	4	2.63326	0.0491856	0.00783208	0.0242485	0.820374	0.846933	1.00544	0.987342	1.12084	0.994203
255003793	P62855	40S ribosomal protein S26	Rps26	-0.14355	0.905289	-0.752953	-0.768018	0.493368	0.468929	0.328893	N	0.182978	0.177718	N	4	2.63326	0.0491856	0.0545208	0.0524029	0.852892	0.598069	0.886616	1.23741	0.864863	0.665954
61888838	Q99N15	17beta-hydroxysteroid dehydrogenase type 10/short chain L-3-hydroxyacyl-CoA dehydrogenase (3-hydroxyacyl-CoA dehydrogenase type-2) (Hydroxysteroid (17-beta) dehydrogenase 10)	Hsd17b10	-0.144582	0.904641	-0.619983	-0.675502	0.568842	0.522199	0.282164	N	0.202511	0.192198	N	4	2.63326	0.0491856	0.0815759	0.0687177	0.055992	0.173636	0.226919	-0.153461	0.580828	0.462927
568994729	UPI0003D73D7B	myosin-11 isoform X1	Myh11	-0.144845	0.904477	-0.550161	-0.61866	0.611486	0.556778	0.254318	N	0.213432	0.201548	N	4	2.63326	0.0491856	0.103972	0.0822233	-0.135215	-0.194692	-0.652672	0.215261	-0.286773	-0.476532
377837258	P62830	60S ribosomal protein L23	Rpl23	-0.144937	0.904419	-2.21952	-1.16085	0.0906611	0.285769	0.543984	N	0.070555	0.123975	N	4	2.63326	0.0491856	0.00639634	0.0233828	1.15773	1.10331	1.30708	1.31512	1.30669	1.38112
30061351	P62806	Histone H4	Hist1h4a; Hist1h4b; Hist1h4c; Hist1h4d; Hist1h4f; Hist1h4h; Hist1h4i; Hist1h4j; Hist1h4k; Hist1h4m; Hist2h4a; Hist4h4	-0.148016	0.902491	-2.2035	-1.17987	0.0922915	0.27863	0.554972	N	0.0709128	0.122273	N	4	2.63326	0.0491856	0.00676832	0.0236071	0.602772	0.787899	0.735001	0.92784	0.846139	0.795741
161377418	Q149B8	PGC-1 and ERR-induced regulator in muscle protein 1 (PPARGC1 and ESRR-induced regulator in muscle 1) (Peroxisome proliferator-activated receptor gamma coactivator 1 and estrogen-related receptor-induced regulator in muscle 1)	Perm1	-0.149026	0.901859	-1.59173	-1.10154	0.186658	0.309017	0.510018	N	0.0957058	0.131559	N	4	2.63326	0.0491856	0.0131485	0.0274545	0.200231	0.0556874	-0.0977244	0.275658	0.165181	0.164434
31543976	P61982	14-3-3 protein gamma [Cleaved into: 14-3-3 protein gamma, N-terminally processed]	Ywhag	-0.149204	0.901748	-1.73168	-1.12808	0.158372	0.298431	0.525156	N	0.087561	0.12801	N	4	2.63326	0.0491856	0.0111357	0.0262407	0.468789	0.560403	0.298905	0.534731	0.573434	0.667544
568918914	Q99JB8	Protein kinase C and casein kinase II substrate protein 3	Pacsin3	-0.152115	0.89993	-2.04039	-1.18896	0.110895	0.275272	0.560238	N	0.0759275	0.121422	N	4	2.63326	0.0491856	0.00833702	0.024553	-0.056876	-0.253411	-0.208391	0.0555636	-0.100197	-0.0176991
568966988	G5E902	MCG10343, isoform CRA_b (Phosphate carrier protein, mitochondrial)	Slc25a3	-0.15274	0.89954	-0.819347	-0.82868	0.458599	0.436084	0.36043	N	0.173409	0.170008	N	4	2.63326	0.0491856	0.052127	0.0509593	0.175859	0.219409	-0.0227131	-0.0645196	0.460181	0.435114
12963537	Q9JHS9	Spliceosome-associated protein CWC15 homolog (Embryonic development factor 1) (mED1)	Cwc15	-0.155263	0.897968	-2.96784	-1.28201	0.0412323	0.242824	0.614709	N	0.0489108	0.111416	N	4	2.63326	0.0491856	0.00410532	0.0220012	-1.95855	-2.02168	-2.03259	-1.88068	-1.90973	-1.75662
6753178	O54962	Barrier-to-autointegration factor (Breakpoint cluster region protein 1) (LAP2-binding protein 1) [Cleaved into: Barrier-to-autointegration factor, N-terminally processed]	Banf1	-0.155445	0.897855	-0.537733	-0.617312	0.619284	0.557615	0.253666	N	0.215385	0.201548	N	4	2.63326	0.0491856	0.125346	0.0951122	-0.406768	0.0726575	-0.239637	0.223847	0.209751	-0.54101
755517048	O88569	Heterogeneous nuclear ribonucleoproteins A2/B1 (hnRNP A2/B1)	Hnrnpa2b1	-0.155927	0.897555	-1.6462	-1.14866	0.175067	0.290424	0.536967	N	0.0925634	0.125676	N	4	2.63326	0.0491856	0.0134576	0.0276409	-0.183287	-0.103602	-0.0351573	-0.120159	0.124896	0.140999
6677805	P62702	40S ribosomal protein S4, X isoform	Rps4x	-0.159707	0.895207	-2.3405	-1.26956	0.0793353	0.246964	0.607366	N	0.0654788	0.112862	N	4	2.63326	0.0491856	0.00698428	0.0237373	0.268111	0.173242	0.349864	0.333572	0.458512	0.478253
30794164	Q6IRU5	Clathrin light chain B (Lcb)	Cltb	-0.160723	0.894576	-2.82335	-1.31356	0.0476656	0.2326	0.633391	N	0.0531404	0.108766	N	4	2.63326	0.0491856	0.00486093	0.0224569	0.592035	0.550787	0.562707	0.638088	0.719663	0.829948
1039732377	UPI0007ED0321	pericentrin isoform X1	Pcnt	-0.160727	0.894574	-1.07448	-0.987145	0.343104	0.358201	0.445874	N	0.140439	0.146486	N	4	2.63326	0.0491856	0.0335639	0.0397654	-0.587787	-0.859195	-0.828066	-0.449167	-0.50292	-0.840781
9845257	P15864	Histone H1.2 (H1 VAR.1) (H1c)	Hist1h1c	-0.161299	0.89422	-0.556486	-0.639191	0.607541	0.54413	0.264298	N	0.212534	0.198139	N	4	2.63326	0.0491856	0.126022	0.0955197	0.728176	0.677734	0.669256	0.302363	0.97469	1.28201
213688406	P63168	Dynein light chain 1, cytoplasmic (8 kDa dynein light chain) (DLC8) (Dynein light chain LC8-type 1) (Protein inhibitor of neuronal nitric oxide synthase) (PIN) (mPIN)	Dynll1	-0.162878	0.893241	-1.20391	-1.05018	0.294995	0.330383	0.480982	N	0.1272	0.138079	N	4	2.63326	0.0491856	0.0274555	0.0360819	0.646559	0.423105	0.448264	0.892599	0.508159	0.605804
755504360	UPI0003D747A1	nexilin isoform X5	Nexn;Nexn	-0.164978	0.891942	-0.974386	-0.947708	0.385039	0.376514	0.424219	N	0.152725	0.15162	N	4	2.63326	0.0491856	0.0430013	0.0454564	-0.130558	-0.534198	-0.386548	0.0289755	-0.19364	-0.391705
194440682	Q52KI8	Serine/arginine repetitive matrix protein 1 (Plenty-of-prolines 101)	Srrm1	-0.165269	0.891762	-6.91994	-1.42978	0.00228862	0.198142	0.703023	N	0.0432996	0.0960656	N	4	2.63326	0.0491856	0.000855594	0.0200416	-0.314595	-0.302471	-0.271991	-0.154452	-0.0907677	-0.148031
568967959	D3Z3N4	Heterogeneous nuclear ribonucleoprotein H3 (MCG11326, isoform CRA_a)	Hnrnph3	-0.165551	0.891588	-1.44909	-1.14548	0.220899	0.291651	0.535137	N	0.105002	0.126047	N	4	2.63326	0.0491856	0.0195776	0.0313314	-0.362297	-0.459033	-0.36465	-0.273521	-0.0216917	-0.394115
228480232	P57784	U2 small nuclear ribonucleoprotein A' (U2 snRNP A')	Snrpa1	-0.167285	0.890517	-1.52053	-1.17365	0.203017	0.280948	0.551375	N	0.0995147	0.123132	N	4	2.63326	0.0491856	0.0181559	0.0304741	0.182362	0.000581831	0.172213	0.333805	0.416975	0.106233
568966894	UPI00006090DC	protein phosphatase 1 regulatory subunit 12A isoform X4	Ppp1r12a	-0.167443	0.890419	-0.408957	-0.495689	0.70352	0.63611	0.196468	N	0.235375	0.222405	N	4	2.63326	0.0491856	0.251462	0.171162	-2.61858	-3.01545	-3.12593	-2.29455	-2.45769	-3.50539
255003735	Q5XJF6	Ribosomal protein	Rpl10a	-0.167768	0.890219	-1.65325	-1.20991	0.173624	0.267657	0.572421	N	0.092522	0.118674	N	4	2.63326	0.0491856	0.0154466	0.0288403	0.0366226	-0.198576	0.129646	0.148199	0.208496	0.114301
13385036	Q9CZM2	60S ribosomal protein L15	Rpl15	-0.168351	0.889859	-1.11347	-1.02833	0.327901	0.339825	0.468745	N	0.137369	0.140711	N	4	2.63326	0.0491856	0.0342896	0.040203	0.536058	0.633676	0.743053	0.855063	1.01813	0.544647
568921945	P48678	Prelamin-A/C [Cleaved into: Lamin-A/C]	Lmna	-0.168473	0.889784	-1.06621	-1.00551	0.346407	0.349913	0.45604	N	0.141279	0.143439	N	4	2.63326	0.0491856	0.0374511	0.0421095	0.673782	0.380884	0.411995	0.900032	0.60569	0.466358
902763256	D3YYB0	40S ribosomal protein S27	Rps27l	-0.169787	0.888974	-0.34783	-0.428913	0.7455	0.68157	0.166489	N	0.246741	0.23494	N	4	2.63326	0.0491856	0.357407	0.23505	-0.738826	-0.0316447	0.272213	0.479574	0.290994	-0.759466
755513807	UPI0003D7782B	CAP-Gly domain-containing linker protein 1 isoform X1	Clip1	-0.170231	0.8887	-0.744986	-0.806947	0.497671	0.447659	0.349053	N	0.183735	0.173141	N	4	2.63326	0.0491856	0.0783202	0.0667544	-0.436841	-0.954764	-0.489425	-0.1664	-0.491776	-0.71216
224994260	P14206	40S ribosomal protein SA (37 kDa laminin receptor precursor) (37LRP) (37 kDa oncofetal antigen) (37/67 kDa laminin receptor) (LRP/LR) (67 kDa laminin receptor) (67LR) (Laminin receptor 1) (LamR) (Laminin-binding protein precursor p40) (LBP/p40) (OFA/iLRP)	Rpsa	-0.170487	0.888543	-1.62099	-1.21505	0.180337	0.265818	0.575416	N	0.0935751	0.118254	N	4	2.63326	0.0491856	0.0165925	0.0295313	0.518023	0.276428	0.52701	0.738793	0.573992	0.520137
124486712	Q99PL5	Ribosome-binding protein 1 (Ribosome receptor protein) (RRp) (mRRp)	Rrbp1	-0.172095	0.887553	-1.58666	-1.21353	0.187778	0.266363	0.574525	N	0.0959894	0.118254	N	4	2.63326	0.0491856	0.0176466	0.0301669	-0.000280574	-0.133706	0.0851637	0.292213	0.183403	-0.00815263
148747408	P97927	Laminin subunit alpha-4 (Laminin-14 subunit alpha) (Laminin-8 subunit alpha) (Laminin-9 subunit alpha)	Lama4	-0.172437	0.887343	-0.81625	-0.862949	0.460176	0.41827	0.378544	N	0.173677	0.164563	N	4	2.63326	0.0491856	0.0669427	0.0598935	0.306097	-0.182117	-0.291082	0.0287421	0.324857	-0.00339127
13386014	Q9CZX9	ER membrane protein complex subunit 4 (Transmembrane protein 85)	Emc4	-0.17375	0.886535	-1.70896	-1.25229	0.162639	0.252808	0.597209	N	0.0884439	0.114357	N	4	2.63326	0.0491856	0.0155053	0.0288756	-0.447115	-0.22432	-0.107611	-0.0793899	-0.1242	-0.0542047
244790081	A0A0A0MQ83	Multiple epidermal growth factor-like domains protein 6	Megf6	-0.175088	0.885713	-2.89955	-1.41941	0.0441378	0.20102	0.696761	N	0.0505329	0.0970484	N	4	2.63326	0.0491856	0.00546945	0.0228238	-1.12345	-1.01391	-1.0459	-0.963355	-0.790065	-0.904575
22122585	Q8BL97	Serine/arginine-rich splicing factor 7 (Splicing factor, arginine/serine-rich 7)	Srsf7	-0.177945	0.883961	-1.41249	-1.184	0.23067	0.277101	0.557363	N	0.107832	0.121757	N	4	2.63326	0.0491856	0.0238063	0.0338814	-0.958928	-1.18906	-0.9481	-0.948052	-0.657211	-0.956991
1039735679	UPI0003D729E8	flotillin-2 isoform X1	Flot2	-0.17842	0.88367	-0.983284	-0.984084	0.381138	0.359597	0.444184	N	0.151811	0.146875	N	4	2.63326	0.0491856	0.0493878	0.0493076	0.148122	0.0164291	-0.162466	-0.0895032	0.456102	0.170746
6753074	P84091	AP-2 complex subunit mu (AP-2 mu chain) (Adaptor protein complex AP-2 subunit mu) (Adaptor-related protein complex 2 subunit mu) (Clathrin assembly protein complex 2 mu medium chain) (Clathrin coat assembly protein AP50) (Clathrin coat-associated protein AP50) (Mu2-adaptin) (Plasma membrane adaptor AP-2 50 kDa protein)	Ap2m1	-0.178608	0.883555	-2.59827	-1.41795	0.0601574	0.20143	0.695876	N	0.0574777	0.0971093	N	4	2.63326	0.0491856	0.00708801	0.0237999	0.0867937	0.0154371	0.061262	0.140221	0.19956	0.359536
118403322	Q9D7B6	Isobutyryl-CoA dehydrogenase, mitochondrial (EC 1.3.99.-) (Acyl-CoA dehydrogenase family member 8) (ACAD-8)	Acad8	-0.178845	0.88341	-0.798021	-0.859433	0.469552	0.420073	0.376675	N	0.175685	0.165083	N	4	2.63326	0.0491856	0.0753387	0.0649565	0.0958598	0.639716	0.381724	0.271643	0.556855	0.825338
255759888	Q9QYB5	Gamma-adducin (Adducin-like protein 70)	Add3	-0.179257	0.883158	-1.93629	-1.32928	0.124909	0.227649	0.642734	N	0.080027	0.106597	N	4	2.63326	0.0491856	0.012856	0.0272781	-0.563518	-0.600404	-0.610953	-0.591135	-0.289467	-0.356501
254675270	P97461	40S ribosomal protein S5 [Cleaved into: 40S ribosomal protein S5, N-terminally processed]	Rps5	-0.17953	0.882991	-1.60449	-1.25185	0.183875	0.252959	0.59695	N	0.094853	0.114357	N	4	2.63326	0.0491856	0.01878	0.0308504	0.111973	-0.225902	0.0626146	0.12583	0.237725	0.123721
6671509	P60710	Actin, cytoplasmic 1 (Beta-actin) [Cleaved into: Actin, cytoplasmic 1, N-terminally processed]	Actb	-0.180101	0.882641	-1.04833	-1.02597	0.353649	0.340855	0.46743	N	0.143199	0.140787	N	4	2.63326	0.0491856	0.0442719	0.0462225	0.34234	0.0628946	0.276194	0.667443	0.405361	0.148929
19527168	Q99JF8	PC4 and SFRS1-interacting protein (Lens epithelium-derived growth factor) (mLEDGF)	Psip1	-0.180602	0.882335	-1.38771	-1.18492	0.237528	0.276758	0.5579	N	0.110096	0.121757	N	4	2.63326	0.0491856	0.0254063	0.0348462	-0.38578	-0.402655	-0.383185	0.0191037	-0.431022	-0.217896
161484662	Q6ZWZ7	60S ribosomal protein L17 (MCG123291, isoform CRA_d) (MCG50776) (Ribosomal protein L17)	Rpl17	-0.180928	0.882135	-1.44588	-1.20728	0.221741	0.268606	0.570884	N	0.105108	0.118941	N	4	2.63326	0.0491856	0.0234878	0.0336893	1.13069	0.772674	0.904091	1.00368	1.10554	1.24102
84370361	O88322	Nidogen-2 (NID-2) (Entactin-2)	Nid2	-0.181906	0.881538	-0.838288	-0.893889	0.44904	0.402647	0.395075	N	0.170422	0.160259	N	4	2.63326	0.0491856	0.0706315	0.062118	0.172072	-0.288925	-0.452112	0.185801	-0.0130125	-0.196036
11528490	Q9JJ28	Protein flightless-1 homolog	Flii	-0.182027	0.881464	-1.07805	-1.04729	0.341687	0.33162	0.479359	N	0.140028	0.138197	N	4	2.63326	0.0491856	0.042765	0.0453139	0.0265943	-0.343891	-0.170019	0.199055	0.0942207	-0.23451
31982526	Q9EPC1	Alpha-parvin (Actopaxin)	Parva	-0.183167	0.880767	-0.802936	-0.869292	0.46701	0.415031	0.381919	N	0.175474	0.163756	N	4	2.63326	0.0491856	0.0780596	0.0665973	0.393726	-0.0467647	0.228835	0.0529897	0.366526	0.705783
122937370	A6H6E2	Multimerin-2	Mmrn2	-0.183791	0.880386	-1.48418	-1.23174	0.211925	0.259918	0.585164	N	0.101735	0.116297	N	4	2.63326	0.0491856	0.0230021	0.0333964	0.256311	0.133957	-0.0363073	0.482127	0.215094	0.208113
568946063	Q5I1X5	RelA-associated inhibitor (Inhibitor of ASPP protein) (Protein iASPP) (NFkB-interacting protein 1) (PPP1R13B-like protein)	Ppp1r13l	-0.18535	0.879436	-0.588694	-0.686978	0.587704	0.515386	0.287867	N	0.207482	0.191544	N	4	2.63326	0.0491856	0.148695	0.109192	-1.76517	-2.32381	-2.17279	-1.51155	-1.78149	-2.41268
83921589	Q6P5B5	Fragile X mental retardation syndrome-related protein 2 (Fragile X mental retardation, autosomal homolog 2)	Fxr2	-0.186154	0.878946	-1.13941	-1.09101	0.318134	0.313306	0.504031	N	0.134106	0.132889	N	4	2.63326	0.0491856	0.0400385	0.0436697	-0.286718	-0.720391	-0.662756	-0.201784	-0.511993	-0.397626
31560394	Q9DBR0	A-kinase anchor protein 8 (AKAP-8) (A-kinase anchor protein 95 kDa) (AKAP 95)	Akap8	-0.18618	0.87893	-0.519384	-0.618874	0.630908	0.556645	0.254421	N	0.218189	0.201548	N	4	2.63326	0.0491856	0.192743	0.135754	-2.75155	-3.1513	-2.78068	-2.78959	-2.09249	-3.24291
58037465	P62717	60S ribosomal protein L18a	Rpl18a	-0.186362	0.878819	-1.64675	-1.29405	0.174954	0.238876	0.621828	N	0.0925634	0.110219	N	4	2.63326	0.0491856	0.019211	0.0311103	0.43947	0.499315	0.760192	0.668759	0.858335	0.73097
755562919	UPI0005AB988F	sorbin and SH3 domain-containing protein 1 isoform X2	Sorbs1	-0.186774	0.878568	-0.796062	-0.868838	0.470569	0.415262	0.381677	N	0.175836	0.163756	N	4	2.63326	0.0491856	0.0825719	0.0693183	-0.765867	-1.17797	-1.25588	-0.670708	-0.733306	-1.23538
6671569	P14869	60S acidic ribosomal protein P0 (60S ribosomal protein L10E)	Rplp0	-0.188726	0.87738	-3.04083	-1.52378	0.0383709	0.173723	0.760144	N	0.0479872	0.0880942	N	4	2.63326	0.0491856	0.00577791	0.0230098	0.447302	0.523769	0.656774	0.73147	0.713394	0.74916
114326446	Q8VDD5	Myosin-9 (Cellular myosin heavy chain, type A) (Myosin heavy chain 9) (Myosin heavy chain, non-muscle IIa) (Non-muscle myosin heavy chain A) (NMMHC-A) (Non-muscle myosin heavy chain IIa) (NMMHC II-a) (NMMHC-IIA)	Myh9	-0.188737	0.877373	-1.80706	-1.34829	0.145042	0.221785	0.654067	N	0.0849003	0.104422	N	4	2.63326	0.0491856	0.0163629	0.0293928	0.198168	-0.057575	0.0684886	0.209381	0.403659	0.162253
126723006	P11152	Lipoprotein lipase (LPL) (EC 3.1.1.34)	Lpl	-0.189456	0.876937	-3.90256	-1.5767	0.0175035	0.161223	0.792574	N	0.0432996	0.0843808	N	4	2.63326	0.0491856	0.00353514	0.0216574	0.245556	0.124989	0.156194	0.321738	0.428497	0.344871
569003563	UPI0003D77ACD	supervillin isoform X1	Svil	-0.190181	0.876496	-1.01045	-1.0257	0.369438	0.340974	0.467278	N	0.148528	0.140787	N	4	2.63326	0.0491856	0.0531369	0.0515683	-0.036446	-0.220177	-0.449046	0.221387	-0.0767381	-0.279775
568973327	UPI00004291E2	CDGSH iron-sulfur domain-containing protein 3, mitochondrial isoform X1	Cisd3	-0.191487	0.875703	-1.76752	-1.35082	0.151879	0.221013	0.655582	N	0.0865115	0.104202	N	4	2.63326	0.0491856	0.0176052	0.030142	1.03918	0.918832	0.791567	0.966859	1.10834	1.24884
157739934	Q8CHS7	Dehydrogenase/reductase SDR family member 7C (EC 1.1.-.-) (Short-chain dehydrogenase/reductase family 32C member 2)	Dhrs7c	-0.192698	0.874968	-1.36493	-1.21785	0.244008	0.264821	0.577048	N	0.111755	0.118028	N	4	2.63326	0.0491856	0.0298969	0.0375541	-0.0190594	-0.341458	-0.32895	-0.0350716	0.12444	-0.200741
257796239	Q99PR8	Heat shock protein beta-2 (HspB2)	Hspb2	-0.195904	0.873026	-1.63478	-1.3306	0.177434	0.227238	0.643519	N	0.0930608	0.10655	N	4	2.63326	0.0491856	0.0215406	0.0325151	-0.316808	-0.454543	-0.435714	0.0145642	-0.346419	-0.287499
568908013	Q8VDJ3	Vigilin (High density lipoprotein-binding protein) (HDL-binding protein)	Hdlbp	-0.196143	0.872881	-2.07513	-1.4458	0.106609	0.193771	0.712711	N	0.0747982	0.0947516	N	4	2.63326	0.0491856	0.0134012	0.0276069	0.518371	0.251924	0.465787	0.548198	0.573434	0.702878
94363330	P47915	60S ribosomal protein L29	Rpl29	-0.196957	0.872389	-1.38037	-1.23841	0.239596	0.257594	0.589065	N	0.110479	0.115408	N	4	2.63326	0.0491856	0.030538	0.0379407	1.54054	1.40238	1.51215	1.42089	1.74451	1.88054
47059484	Q60972	Histone-binding protein RBBP4 (Chromatin assembly factor 1 subunit C) (CAF-1 subunit C) (Chromatin assembly factor I p48 subunit) (CAF-I 48 kDa subunit) (CAF-I p48) (Nucleosome-remodeling factor subunit RBAP48) (Retinoblastoma-binding protein 4) (RBBP-4) (Retinoblastoma-binding protein p48)	Rbbp4	-0.198691	0.871341	-2.11869	-1.46794	0.101492	0.187873	0.726135	N	0.0738139	0.0926118	N	4	2.63326	0.0491856	0.0131921	0.0274807	0.0581763	-0.0863678	0.0582626	0.333181	0.234781	0.0581822
148277080	Q8VBT1	Beta-taxilin (Muscle-derived protein 77)	Txlnb	-0.199412	0.870905	-1.86024	-1.41194	0.136363	0.203115	0.692257	N	0.08253	0.0977841	N	4	2.63326	0.0491856	0.0172368	0.0299198	0.326671	0.0857447	0.0499391	0.245228	0.462684	0.352679
21703784	Q91YN9	BAG family molecular chaperone regulator 2 (BAG-2) (Bcl-2-associated athanogene 2)	Bag2	-0.199889	0.870617	-1.1395	-1.12494	0.3181	0.299664	0.523365	N	0.134106	0.128215	N	4	2.63326	0.0491856	0.0461576	0.0473596	-0.294477	-0.807999	-0.693818	-0.245514	-0.519972	-0.43114
568944892	UPI00001F4C25	Heterogeneous nuclear ribonucleoprotein L	Hnrnp	-0.200283	0.87038	-3.56288	-1.63954	0.0235253	0.147474	0.831286	N	0.0433834	0.0798716	N	4	2.63326	0.0491856	0.00474	0.022384	-0.220105	-0.241767	-0.076556	0.0451368	0.0398573	-0.0225722
205830428	G3UW82	MCG140437, isoform CRA_d (Myosin, heavy polypeptide 2, skeletal muscle, adult)	Myh2	-0.200307	0.870365	-0.324301	-0.406285	0.76196	0.697319	0.156568	N	0.25072	0.239164	N	4	2.63326	0.0491856	0.572252	0.364606	0.592825	0.124233	0.494324	-0.572809	0.981313	1.4038
115583687	Q99PV0	Pre-mRNA-processing-splicing factor 8 (Splicing factor Prp8)	Prpf8	-0.20058	0.8702	-2.83743	-1.58422	0.0469897	0.159518	0.797191	N	0.0527338	0.0837445	N	4	2.63326	0.0491856	0.00749579	0.0240458	-0.511226	-0.684205	-0.580633	-0.295164	-0.418087	-0.461072
568936990	P47911	60S ribosomal protein L6 (TAX-responsive enhancer element-binding protein 107) (TAXREB107)	Rpl6	-0.201109	0.869882	-1.09194	-1.09924	0.336218	0.309953	0.508705	N	0.139009	0.131794	N	4	2.63326	0.0491856	0.0508809	0.0502079	0.73937	0.468568	0.793552	0.559727	1.01564	1.02945
568949265	UPI00006059A3	nuclear mitotic apparatus protein 1 isoform X1	Numa1	-0.201817	0.869455	-3.26665	-1.63059	0.0308865	0.149362	0.825761	N	0.0447269	0.0805017	N	4	2.63326	0.0491856	0.00572532	0.0229781	-0.478537	-0.400571	-0.61031	-0.305443	-0.30042	-0.278105
568962784	Q61292	Laminin subunit beta-2 (Laminin-11 subunit beta) (Laminin-14 subunit beta) (Laminin-15 subunit beta) (Laminin-3 subunit beta) (Laminin-4 subunit beta) (Laminin-7 subunit beta) (Laminin-9 subunit beta) (S-laminin subunit beta) (S-LAM beta)	Lamb2	-0.204327	0.867943	-0.995162	-1.04218	0.375983	0.333814	0.476495	N	0.150445	0.138499	N	4	2.63326	0.0491856	0.0632349	0.0576576	0.298076	-0.224494	-0.20451	0.386876	0.068064	0.0271139
568987140	UPI0003D76F96	succinyl-CoA ligase [ADP-forming] subunit beta, mitochondrial isoform X1	Sucla2	-0.204965	0.86756	-0.437463	-0.537536	0.684359	0.608448	0.215777	N	0.231017	0.215151	N	4	2.63326	0.0491856	0.329281	0.218089	-0.0352532	1.13786	0.6798	0.190493	0.926748	1.28006
14149647	P51410	60S ribosomal protein L9	Rpl9	-0.20536	0.867322	-2.78156	-1.6083	0.0497389	0.154164	0.812016	N	0.0538681	0.0820669	N	4	2.63326	0.0491856	0.00817605	0.024456	0.676697	0.522491	0.671371	0.934934	0.791796	0.759908
165377271	Q9D832	DnaJ homolog subfamily B member 4	Dnajb4	-0.206829	0.86644	-0.942822	-1.00878	0.399156	0.348453	0.457855	N	0.155853	0.143184	N	4	2.63326	0.0491856	0.0721862	0.0630555	0.796088	0.140646	0.411152	0.872561	0.520582	0.57523
226874906	P62259	14-3-3 protein epsilon (14-3-3E)	Ywhae	-0.208041	0.865712	-2.10566	-1.51314	0.102993	0.176341	0.753646	N	0.0739819	0.0886344	N	4	2.63326	0.0491856	0.0146425	0.0283554	-0.257605	-0.179789	-0.440704	0.0370194	-0.160926	-0.130067
34328148	Q64511	DNA topoisomerase 2-beta (EC 5.99.1.3) (DNA topoisomerase II, beta isozyme)	Top2b	-0.210224	0.864403	-1.30427	-1.24128	0.262127	0.256599	0.590746	N	0.117981	0.115204	N	4	2.63326	0.0491856	0.038969	0.0430248	0.260407	-0.0586477	0.13167	0.523825	0.366532	0.0737443
33504483	Q6ZWN5	40S ribosomal protein S9	Rps9	-0.210546	0.86421	-1.74287	-1.42543	0.156313	0.199346	0.700393	N	0.0870134	0.096376	N	4	2.63326	0.0491856	0.0218906	0.0327261	0.840949	0.672358	0.988218	0.911444	1.18533	1.03639
568909816	UPI0003D72914	CLIP-associating protein 1 isoform X46	Clasp1	-0.210632	0.864159	-1.81836	-1.44976	0.14315	0.192705	0.715107	N	0.084267	0.094365	N	4	2.63326	0.0491856	0.0201271	0.0316627	-0.995102	-0.869323	-0.88316	-0.902881	-0.685128	-0.52768
34419622	Q6PHQ9	Polyadenylate-binding protein (PABP)	Pabpc4	-0.21072	0.864106	-3.02491	-1.66884	0.038975	0.141447	0.849407	N	0.0482472	0.0778392	N	4	2.63326	0.0491856	0.00727913	0.0239151	0.99218	1.00603	1.18537	1.25955	1.3313	1.22489
58037145	P62317	Small nuclear ribonucleoprotein Sm D2 (Sm-D2) (snRNP core protein D2)	Snrpd2	-0.21208	0.863292	-1.86632	-1.47037	0.135407	0.187237	0.727608	N	0.08253	0.0926118	N	4	2.63326	0.0491856	0.0193696	0.0312059	-0.337935	-0.486071	-0.450578	-0.399161	-0.037713	-0.20147
21703842	Q99LF4	tRNA-splicing ligase RtcB homolog (EC 6.5.1.3) (Focal adhesion-associated protein) (FAAP)	Rtcb	-0.212472	0.863057	-3.27082	-1.70323	0.0307654	0.134672	0.870723	N	0.0447269	0.0753219	N	4	2.63326	0.0491856	0.0063297	0.0233426	0.487951	0.529997	0.412198	0.615179	0.796815	0.655569
8567400	P61358	60S ribosomal protein L27	Rpl27	-0.212521	0.863028	-2.07825	-1.52885	0.106233	0.172486	0.763247	N	0.0747982	0.0877269	N	4	2.63326	0.0491856	0.0156856	0.0289844	0.485695	0.503562	0.770765	0.850757	0.835707	0.711122
110835723	O35286	Pre-mRNA-splicing factor ATP-dependent RNA helicase DHX15 (EC 3.6.4.13) (DEAH box protein 15)	Dhx15	-0.21366	0.862347	-1.31307	-1.25501	0.25942	0.25188	0.598807	N	0.116917	0.114357	N	4	2.63326	0.0491856	0.0397156	0.043475	0.864188	0.513412	0.667631	1.13153	0.859218	0.695462
6755368	P62270	40S ribosomal protein S18 (Ke-3) (Ke3)	Rps18	-0.214377	0.861918	-2.08767	-1.5401	0.105107	0.169774	0.770128	N	0.0747664	0.0870228	N	4	2.63326	0.0491856	0.015817	0.0290636	-0.23165	-0.42224	-0.191638	-0.207985	-0.037713	0.043302
60218877	P55096	ATP-binding cassette sub-family D member 3 (68 kDa peroxisomal membrane protein) (PMP68) (70 kDa peroxisomal membrane protein) (PMP70)	Abcd3	-0.215146	0.861459	-0.698764	-0.812113	0.523195	0.444888	0.351749	N	0.191262	0.172264	N	4	2.63326	0.0491856	0.142199	0.105275	0.672323	0.916677	0.732742	0.40079	1.19017	1.37622
569010120	UPI00001F875A	H/ACA ribonucleoprotein complex subunit 4 isoform X1	Dkc1	-0.215173	0.861443	-2.20769	-1.57159	0.0918621	0.162392	0.789435	N	0.0709128	0.0846923	N	4	2.63326	0.0491856	0.0142492	0.0281182	-0.501258	-0.651495	-0.673993	-0.231849	-0.479418	-0.469959
569004800	Q8BK63	Casein kinase I isoform alpha (CKI-alpha) (EC 2.7.11.1) (CK1)	Csnk1a1	-0.217284	0.860183	-1.24996	-1.22936	0.279451	0.260753	0.58377	N	0.123321	0.116519	N	4	2.63326	0.0491856	0.0453264	0.0468585	0.0651866	-0.373572	-0.390239	0.143295	-0.165882	-0.0241852
568995942	UPI0000D77A6D	glycogen synthase kinase-3 beta isoform 2;;glycogen synthase kinase-3 beta isoform X1	Gsk3b	-0.217697	0.859937	-3.73861	-1.77384	0.0201454	0.121721	0.914635	N	0.0432996	0.0711569	N	4	2.63326	0.0491856	0.005086	0.0225926	-0.301184	-0.310684	-0.225472	-0.0315977	0.00925785	-0.161909
139948818	Q3TJZ6	Protein FAM98A	Fam98a	-0.218711	0.859333	-2.08013	-1.55891	0.106007	0.16533	0.781649	N	0.0747982	0.0859295	N	4	2.63326	0.0491856	0.0165826	0.0295253	0.391067	0.358104	0.207618	0.695746	0.528251	0.388926
755562317	UPI0005ABB16C	carnitine O-palmitoyltransferase 1, liver isoform isoform X2	Cpt1a	-0.219055	0.859128	-1.87219	-1.50191	0.13449	0.179144	0.746798	N	0.082427	0.0897607	N	4	2.63326	0.0491856	0.0205351	0.0319088	-1.43983	-1.29837	-1.43205	-1.36739	-0.996505	-1.14919
27369557	Q922E6	FAST kinase domain-containing protein 2, mitochondrial	Fastkd2	-0.21993	0.858607	-1.77384	-1.47319	0.150763	0.1865	0.729321	N	0.086457	0.0925178	N	4	2.63326	0.0491856	0.0230584	0.0334303	-0.563518	-0.402655	-0.469094	-0.344974	-0.0309344	-0.39957
6754508	Q61792	LIM and SH3 domain protein 1 (LASP-1) (Metastatic lymph node gene 50 protein) (MLN 50)	Lasp1	-0.220051	0.858535	-1.29573	-1.26189	0.264782	0.249546	0.60285	N	0.118741	0.11389	N	4	2.63326	0.0491856	0.0432621	0.0456136	-0.126297	-0.520837	-0.300723	0.146904	-0.16057	-0.274039
226958653	P84099	60S ribosomal protein L19	Rpl19	-0.22037	0.858345	-2.04379	-1.55717	0.110467	0.165736	0.780583	N	0.0759275	0.0859295	N	4	2.63326	0.0491856	0.0174391	0.0300418	0.448227	0.38239	0.562707	0.505263	0.725859	0.823312
327365322	P26369	Splicing factor U2AF 65 kDa subunit (U2 auxiliary factor 65 kDa subunit) (U2 snRNP auxiliary factor large subunit)	U2af2	-0.22116	0.857876	-1.90872	-1.52206	0.128937	0.174143	0.759095	N	0.0810203	0.0881756	N	4	2.63326	0.0491856	0.0201382	0.0316694	-0.258348	-0.137019	0.0661833	0.00877759	0.236815	0.088703
170014725	Q80XN0	D-beta-hydroxybutyrate dehydrogenase, mitochondrial (EC 1.1.1.30) (3-hydroxybutyrate dehydrogenase) (BDH)	Bdh1	-0.221584	0.857624	-1.01842	-1.08688	0.366064	0.314999	0.501691	N	0.147346	0.133277	N	4	2.63326	0.0491856	0.0710084	0.0623452	-0.213885	-0.387779	-0.645529	-0.549345	-0.0316392	-0.00145811
408821450	Q6URW6	Myosin-14 (Myosin heavy chain 14) (Myosin heavy chain, non-muscle IIc) (Non-muscle myosin heavy chain IIc) (NMHC II-C)	Myh14	-0.221911	0.857429	-1.33328	-1.28718	0.253303	0.241122	0.617764	N	0.114888	0.110919	N	4	2.63326	0.0491856	0.041553	0.044583	-0.145476	-0.147813	-0.424748	0.254623	-0.110892	-0.196036
755565320	UPI0005AB96A8	transcriptional regulator ATRX isoform X1	Atrx	-0.224867	0.855674	-1.23997	-1.24069	0.282758	0.2568	0.590404	N	0.124456	0.115204	N	4	2.63326	0.0491856	0.049331	0.0492733	-1.24617	-1.32857	-1.33947	-0.78779	-1.04681	-1.40501
568994601	UPI0000062309	Eukaryotic initiation factor 4A-II	EIF4A2	-0.225158	0.855501	-1.24622	-1.2451	0.280685	0.255277	0.592989	N	0.123705	0.114871	N	4	2.63326	0.0491856	0.0489638	0.0490519	-0.532058	-0.52032	-0.497277	-0.619175	-0.258018	0.00301191
40068493	Q501J6	Probable ATP-dependent RNA helicase DDX17 (EC 3.6.4.13) (DEAD box protein 17)	Ddx17	-0.225399	0.855358	-3.83604	-1.83433	0.0185222	0.111589	0.952377	N	0.0432996	0.0678437	N	4	2.63326	0.0491856	0.00517881	0.0226486	0.803632	0.716198	0.861815	1.01748	1.09077	0.949592
568987089	UPI0000D630C2	40S ribosomal protein S24 isoform X1	Rps24	-0.226973	0.854426	-2.19708	-1.62736	0.092955	0.150049	0.823768	N	0.0709412	0.0805081	N	4	2.63326	0.0491856	0.0160085	0.0291791	1.14444	0.94816	1.14761	1.45281	1.28919	1.17913
6755376	P62082	40S ribosomal protein S7	Rps7	-0.230443	0.852373	-2.41904	-1.69474	0.0728386	0.136316	0.865452	N	0.0626554	0.0758696	N	4	2.63326	0.0491856	0.0136124	0.0277342	1.23436	1.03608	1.26433	1.34011	1.53416	1.35183
224967104	Q3TWW8	Serine/arginine-rich splicing factor 6 (Pre-mRNA-splicing factor SRP55) (Splicing factor, arginine/serine-rich 6)	Srsf6	-0.231389	0.851814	-0.326581	-0.411795	0.760359	0.693469	0.158973	N	0.250436	0.238401	N	4	2.63326	0.0491856	0.753003	0.473603	1.0941	0.0103546	1.06423	-0.244458	1.33626	1.77105
491222947	Q9WUA2	Phenylalanine--tRNA ligase beta subunit (EC 6.1.1.20) (Phenylalanyl-tRNA synthetase beta subunit) (PheRS)	Farsb	-0.232542	0.851134	-2.72224	-1.76202	0.0528643	0.123803	0.907269	N	0.0541287	0.0717033	N	4	2.63326	0.0491856	0.0109456	0.0261261	-0.814735	-0.795166	-0.595155	-0.513868	-0.580607	-0.412955
568952442	P99027	60S acidic ribosomal protein P2	Rplp2	-0.233343	0.850662	-1.79099	-1.53022	0.147781	0.172155	0.764079	N	0.0857626	0.0876893	N	4	2.63326	0.0491856	0.0254621	0.0348799	0.735183	0.507905	0.805797	0.884674	1.09319	0.771049
47059051	Q6PD03	Serine/threonine-protein phosphatase 2A 56 kDa regulatory subunit alpha isoform (PP2A B subunit isoform B'-alpha) (PP2A B subunit isoform B56-alpha) (PP2A B subunit isoform PR61-alpha) (PR61alpha) (PP2A B subunit isoform R5-alpha)	Ppp2r5a	-0.233859	0.850357	-1.06889	-1.14272	0.345335	0.292719	0.533549	N	0.141012	0.126349	N	4	2.63326	0.0491856	0.0718018	0.0628237	-1.38303	-1.05273	-1.02722	-0.566958	-1.19962	-0.994825
158966694	Q61686	Chromobox protein homolog 5 (Heterochromatin protein 1 homolog alpha) (HP1 alpha)	Cbx5	-0.235933	0.849135	-1.72528	-1.5137	0.159561	0.176202	0.753989	N	0.0879314	0.0886344	N	4	2.63326	0.0491856	0.0280511	0.036441	0.11097	0.154147	0.241929	0.559337	0.511526	0.143983
6677799	P62843	40S ribosomal protein S15 (RIG protein)	Rps15	-0.23614	0.849014	-1.74937	-1.52412	0.15513	0.173638	0.760356	N	0.0870134	0.0880942	N	4	2.63326	0.0491856	0.0273315	0.0360071	0.184651	-0.0153818	0.0418247	0.454949	0.398179	0.0663844
285402377	B2RQS1	Striatin-3 (Strn3 protein)	Strn3	-0.236972	0.848524	-1.53537	-1.43208	0.199489	0.197512	0.704407	N	0.0985571	0.0959769	N	4	2.63326	0.0491856	0.0357321	0.0410729	-0.570481	-1.09902	-0.856427	-0.561056	-0.622435	-0.63152
13994221	O35901	U6 snRNA-associated Sm-like protein LSm2	Lsm2	-0.240352	0.846538	-3.65855	-1.92314	0.0216079	0.0981869	1.00795	N	0.0432996	0.0629372	N	4	2.63326	0.0491856	0.00647397	0.0234296	-0.0696191	-0.254484	-0.0569223	0.13404	0.0830239	0.122968
13386062	Q78IK4	MICOS complex subunit Mic27 (Apolipoprotein O-like) (Protein FAM121A)	Apool	-0.241281	0.845994	-1.29831	-1.31154	0.263978	0.233242	0.632193	N	0.118656	0.108918	N	4	2.63326	0.0491856	0.0518065	0.0507661	0.771298	0.388316	0.226266	0.523891	0.826909	0.758924
311893374	D6Q0F5	Cytoplasmic dynein intermediate chain 2 isoform 2.1	Dync1i2	-0.241653	0.845776	-1.74339	-1.54063	0.156217	0.169647	0.770453	N	0.0870134	0.0870228	N	4	2.63326	0.0491856	0.0288193	0.0369043	0.0240589	-0.0959513	0.0969745	-0.00164995	0.401298	0.350393
6671561	P17426	AP-2 complex subunit alpha-1 (100 kDa coated vesicle protein A) (Adaptor protein complex AP-2 subunit alpha-1) (Adaptor-related protein complex 2 subunit alpha-1) (Alpha-adaptin A) (Alpha1-adaptin) (Clathrin assembly protein complex 2 alpha-A large chain) (Plasma membrane adaptor HA2/AP2 adaptin alpha A subunit)	Ap2a1	-0.242928	0.845029	-1.71091	-1.53108	0.162267	0.171945	0.76461	N	0.0884439	0.0876893	N	4	2.63326	0.0491856	0.0302406	0.0377614	-0.902676	-1.2848	-1.19689	-0.850149	-0.763044	-1.04239
568955460	UPI00001F62A3	long-chain fatty acid transport protein 1 isoform X1;long-chain fatty acid transport protein 1 isoform X3	Slc27a1	-0.243121	0.844916	-2.13621	-1.68461	0.0995106	0.1383	0.859177	N	0.0727404	0.0766002	N	4	2.63326	0.0491856	0.0194288	0.0312416	0.809428	0.744395	0.463348	0.996956	0.881955	0.867622
568999211	UPI0003D75049	afadin isoform X1	Mllt4	-0.243137	0.844906	-2.93647	-1.85654	0.0425386	0.108079	0.966259	N	0.0493735	0.0666567	N	4	2.63326	0.0491856	0.0102836	0.0257269	-0.905357	-1.10492	-1.10704	-0.702703	-0.817587	-0.867615
568929767	UPI0003D76185	splicing factor, proline- and glutamine-rich isoform X1	Sfpq	-0.24682	0.842752	-5.17359	-2.05758	0.00663554	0.0808656	1.09224	N	0.0432996	0.0568369	N	4	2.63326	0.0491856	0.00341403	0.0215844	0.128033	0.0652983	0.133873	0.279058	0.425215	0.363391
31982724	Q7TPV4	Myb-binding protein 1A (Myb-binding protein of 160 kDa)	Mybbp1a	-0.247181	0.842541	-1.52603	-1.45556	0.201702	0.191151	0.718624	N	0.0993964	0.0937381	N	4	2.63326	0.0491856	0.0393547	0.0432574	-0.290203	-0.676755	-0.394938	-0.365487	0.0134597	-0.268325
25742730	P62911	60S ribosomal protein L32	Rpl32	-0.247477	0.842368	-1.88478	-1.61734	0.132547	0.1522	0.817586	N	0.0819753	0.0812739	N	4	2.63326	0.0491856	0.0258606	0.0351201	1.33867	1.09258	1.37744	1.39504	1.44885	1.70723
40556608	P11499	Heat shock protein HSP 90-beta (Heat shock 84 kDa) (HSP 84) (HSP84) (Tumor-specific transplantation 84 kDa antigen) (TSTA)	Hsp90ab1	-0.248269	0.841906	-2.39099	-1.77704	0.0750869	0.121164	0.916627	N	0.0638922	0.0710159	N	4	2.63326	0.0491856	0.0161726	0.0292781	0.100081	-0.233091	-0.0432267	0.120104	0.195959	0.252507
13385652	P60867	40S ribosomal protein S20	Rps20	-0.250403	0.840662	-3.28847	-1.94858	0.0302589	0.0946483	1.02389	N	0.0447269	0.0618873	N	4	2.63326	0.0491856	0.00869724	0.0247703	1.09128	0.952172	1.16937	1.24878	1.321	1.39425
162287165	Q924X2	Carnitine O-palmitoyltransferase 1, muscle isoform (CPT1-M) (EC 2.3.1.21) (Carnitine O-palmitoyltransferase I, muscle isoform) (CPT I) (CPTI-M) (Carnitine palmitoyltransferase 1B)	Cpt1b	-0.25093	0.840355	-3.26232	-1.94849	0.031013	0.0946618	1.02383	N	0.0447269	0.0618873	N	4	2.63326	0.0491856	0.00887449	0.0248771	0.611938	0.485308	0.403538	0.673576	0.836962	0.743035
226531227	E9Q512	Thyroid hormone receptor interactor 11	Trip11	-0.25134	0.840116	-0.921994	-1.04517	0.408709	0.33253	0.47817	N	0.15867	0.138197	N	4	2.63326	0.0491856	0.11147	0.0867445	-1.92648	-2.35808	-1.97244	-2.30421	-1.63348	-1.56529
1039727474	UPI0007ECD082	dystonin isoform X1	Dst	-0.253457	0.838884	-2.19122	-1.74548	0.0935649	0.126772	0.896978	N	0.0709412	0.0730518	N	4	2.63326	0.0491856	0.0200692	0.0316278	-0.335485	-0.414092	-0.436781	-0.357814	0.0146924	-0.082865
224967126	Q3U9N4	Granulins	Grn	-0.258228	0.836114	-0.604306	-0.735914	0.578241	0.486983	0.312486	N	0.204996	0.183377	N	4	2.63326	0.0491856	0.273896	0.184691	-0.73108	0.12948	-0.593919	0.310288	0.0607654	-0.791887
257196183	Q3UEB3	Poly(U)-binding-splicing factor PUF60 (60 kDa poly(U)-binding-splicing factor)	Puf60	-0.25879	0.835789	-2.89628	-1.938	0.044283	0.0961056	1.01725	N	0.0505329	0.0621854	N	4	2.63326	0.0491856	0.0119758	0.0267473	1.27278	1.27896	1.41031	1.44531	1.58009	1.71302
38259206	Q6P8J7	Creatine kinase S-type, mitochondrial (EC 2.7.3.2) (Basic-type mitochondrial creatine kinase) (Mib-CK) (Sarcomeric mitochondrial creatine kinase) (S-MtCK)	Ckmt2	-0.260123	0.835017	-0.66603	-0.802761	0.541837	0.449913	0.346871	N	0.195359	0.173601	N	4	2.63326	0.0491856	0.228803	0.157499	0.206746	0.908499	0.785403	0.252008	1.12287	1.30614
61657921	Q61768	Kinesin-1 heavy chain (Conventional kinesin heavy chain) (Ubiquitous kinesin heavy chain) (UKHC)	Kif5b	-0.261808	0.834042	-1.83025	-1.64415	0.141187	0.146509	0.834135	N	0.0838015	0.0794751	N	4	2.63326	0.0491856	0.0306928	0.0380341	-0.0798335	-0.358285	-0.438163	-0.197794	0.123863	-0.0169272
84875537	P09405	Nucleolin (Protein C23)	Ncl	-0.262673	0.833542	-3.69772	-2.07272	0.020877	0.0791157	1.10174	N	0.0432996	0.0564179	N	4	2.63326	0.0491856	0.00756923	0.02409	0.0162771	-0.0341537	0.1572	0.232046	0.376758	0.318537
16716349	Q63850	Nuclear pore glycoprotein p62 (62 kDa nucleoporin) (Nucleoporin Nup62)	Nup62	-0.262784	0.833478	-1.21715	-1.29581	0.290443	0.238304	0.622869	N	0.126324	0.110219	N	4	2.63326	0.0491856	0.0699194	0.0616886	-0.888831	-1.12323	-1.06084	-1.1373	-0.43509	-0.71216
299522842	UPI0001DAD7E5	dynactin subunit 2 isoform 1	Dctn2	-0.263755	0.832917	-2.5223	-1.88344	0.0651968	0.103972	0.983085	N	0.0593987	0.0657616	N	4	2.63326	0.0491856	0.0164021	0.0294164	0.324798	0.198427	0.180156	0.310288	0.602787	0.581571
27883844	P62305	Small nuclear ribonucleoprotein E (snRNP-E) (Sm protein E) (Sm-E) (SmE)	Snrpe	-0.264309	0.832597	-3.23353	-2.02441	0.0318688	0.0848333	1.07143	N	0.0450727	0.0581917	N	4	2.63326	0.0491856	0.0100222	0.0255692	-0.0385351	-0.156011	-0.0555981	0.130469	0.324925	0.0873896
6680047	P68040	Receptor of activated protein C kinase 1 (12-3) (Guanine nucleotide-binding protein subunit beta-2-like 1) (Receptor for activated C kinase) (Receptor of activated protein kinase C 1) (p205) [Cleaved into: Receptor of activated protein C kinase 1, N-terminally processed (Guanine nucleotide-binding protein subunit beta-2-like 1, N-terminally processed)]	Rack1	-0.26437	0.832562	-6.24122	-2.22647	0.00335873	0.0633732	1.19809	N	0.0432996	0.0502187	N	4	2.63326	0.0491856	0.0026914	0.0211486	0.283332	0.238475	0.324216	0.485313	0.60424	0.549581
569008026	UPI0003D6E56B	survival of motor neuron-related-splicing factor 30 isoform X1	Smndc1	-0.265377	0.831981	-2.7801	-1.95047	0.0498133	0.094391	1.02507	N	0.0538681	0.0618873	N	4	2.63326	0.0491856	0.0136677	0.0277675	-1.89954	-2.19271	-1.94671	-1.78127	-1.77206	-1.6895
568955192	UPI0003D71226	epidermal growth factor receptor substrate 15-like 1 isoform X1	Eps15l1	-0.265495	0.831913	-2.48935	-1.88317	0.0675315	0.104012	0.982915	N	0.0607464	0.0657616	N	4	2.63326	0.0491856	0.0170621	0.0298144	-0.291626	-0.31462	-0.438365	-0.223504	-0.12645	0.101828
6677809	P62754	40S ribosomal protein S6 (Phosphoprotein NP33)	Rps6	-0.265842	0.831713	-2.82975	-1.96306	0.0473569	0.0926917	1.03296	N	0.0529704	0.0616069	N	4	2.63326	0.0491856	0.0132385	0.0275088	0.637358	0.515297	0.742643	0.801526	0.864357	1.02694
6677801	P63276	40S ribosomal protein S17	Rps17	-0.267241	0.830907	-1.93843	-1.70809	0.124603	0.133741	0.873737	N	0.080027	0.075004	N	4	2.63326	0.0491856	0.0285101	0.0367179	1.26554	0.881167	1.30845	1.45184	1.37336	1.43168
58037467	Q8BXV2	BRI3-binding protein (I3-binding protein)	Bri3bp	-0.267327	0.830857	-2.09184	-1.76788	0.104613	0.122766	0.910922	N	0.0746426	0.0712231	N	4	2.63326	0.0491856	0.0244975	0.0342982	0.09588	0.0256912	-0.0428146	0.0555595	0.453768	0.371411
6677813	P62242	40S ribosomal protein S8	Rps8	-0.268648	0.830097	-1.8343	-1.66763	0.140525	0.141692	0.848654	N	0.0835549	0.0778489	N	4	2.63326	0.0491856	0.032175	0.0389279	1.07102	0.965846	1.22164	1.44072	1.5175	1.10623
568914012	UPI0003D712FB	pre-mRNA-processing factor 40 homolog A isoform X1	Prpf40a	-0.269061	0.82986	-3.16067	-2.04051	0.0341621	0.0828843	1.08153	N	0.0455507	0.0576637	N	4	2.63326	0.0491856	0.0108701	0.0260806	0.0748946	-0.165518	-0.0795155	0.133972	0.203644	0.299428
568962064	Q059P4	Filamin-A-interacting protein 1 (MCG18834, isoform CRA_b)	Filip1	-0.269181	0.82979	-1.32407	-1.38196	0.256072	0.211726	0.674226	N	0.115716	0.100795	N	4	2.63326	0.0491856	0.061995	0.05691	-0.584605	-1.21843	-1.12763	-0.640017	-0.686075	-0.797029
110626031	Q60749	KH domain-containing, RNA-binding, signal transduction-associated protein 1 (GAP-associated tyrosine phosphoprotein p62) (Src-associated in mitosis 68 kDa protein) (Sam68) (p21 Ras GTPase-activating protein-associated p62) (p68)	Khdrbs1	-0.269316	0.829713	-2.73417	-1.96066	0.0522178	0.0930135	1.03145	N	0.0541287	0.0617009	N	4	2.63326	0.0491856	0.0145533	0.0283016	0.23167	0.170003	0.262398	0.444684	0.672747	0.354587
85701616	Q3UIJ9	Myocardial zonula adherens protein	Myzap	-0.269898	0.829378	-1.48582	-1.48767	0.211514	0.182758	0.738124	N	0.101705	0.090793	N	4	2.63326	0.0491856	0.0494946	0.0493719	-0.107372	-0.472396	-0.41574	-0.338201	0.0200025	0.132386
134031994	P49722	Proteasome subunit alpha type-2 (EC 3.4.25.1) (Macropain subunit C3) (Multicatalytic endopeptidase complex subunit C3) (Proteasome component C3)	Psma2	-0.274333	0.826832	-1.38678	-1.43367	0.237788	0.197074	0.70537	N	0.110096	0.0959769	N	4	2.63326	0.0491856	0.0586993	0.0549226	0.468235	0.142407	0.349667	0.629903	0.875465	0.277941
254553321	P97351	40S ribosomal protein S3a (Protein TU-11)	Rps3a	-0.274584	0.826689	-2.81454	-2.00493	0.0480943	0.0872542	1.05921	N	0.0532009	0.0587919	N	4	2.63326	0.0491856	0.0142767	0.0281348	0.659537	0.461004	0.684344	0.742821	0.957846	0.92797
23956082	P47962	60S ribosomal protein L5	Rpl5	-0.277052	0.825276	-2.16874	-1.83249	0.0959451	0.111885	0.951227	N	0.0717825	0.0679031	N	4	2.63326	0.0491856	0.0244792	0.0342871	0.310795	0.214368	0.356996	0.7992	0.525188	0.388926
755558856	UPI0005ABA008	40S ribosomal protein S10 isoform X1	Rps10	-0.277795	0.824851	-1.75553	-1.65669	0.154019	0.143917	0.841889	N	0.0870134	0.0785668	N	4	2.63326	0.0491856	0.0375599	0.0421751	1.13211	0.978615	1.19291	1.50268	1.544	1.09034
329299035	Q8BJS4	SUN domain-containing protein 2 (Protein unc-84 homolog B) (Sad1/unc-84 protein-like 2)	Sun2	-0.28002	0.82358	-2.94416	-2.06031	0.0422139	0.0805473	1.09395	N	0.0492384	0.0568369	N	4	2.63326	0.0491856	0.013569	0.027708	-0.371252	-0.496539	-0.455569	0.0137994	-0.237834	-0.259265
569001415	UPI0003D0C661	myosin regulatory light chain RLC-A isoform X1;myosin light chain, regulatory B-like isoform X1	Myl12a	-0.281331	0.822832	-1.78368	-1.68072	0.149043	0.139071	0.856762	N	0.0860532	0.0769028	N	4	2.63326	0.0491856	0.0373156	0.0420277	-0.401883	-0.61897	-0.507905	-0.0155634	-0.164545	-0.504657
124487099	Q00PI9	Heterogeneous nuclear ribonucleoprotein U-like protein 2 (MLF1-associated nuclear protein)	Hnrnpul2	-0.281445	0.822766	-5.39519	-2.32464	0.00571046	0.0550247	1.25944	N	0.0432996	0.047422	Y	4	2.63326	0.0491856	0.00408193	0.0219871	0.0579478	0.0188436	-0.0791888	0.242741	0.345373	0.253825
13385598	P62320	Small nuclear ribonucleoprotein Sm D3 (Sm-D3) (snRNP core protein D3)	Snrpd3	-0.282172	0.822352	-4.86569	-2.30047	0.00824533	0.0569699	1.24435	N	0.0432996	0.0483379	Y	4	2.63326	0.0491856	0.00504465	0.0225677	0.281597	0.10196	0.262135	0.512265	0.504333	0.47561
6755863	P08113	Endoplasmin (94 kDa glucose-regulated protein) (GRP-94) (Endoplasmic reticulum resident protein 99) (ERp99) (Heat shock protein 90 kDa beta member 1) (Polymorphic tumor rejection antigen 1) (Tumor rejection antigen gp96)	Hsp90b1	-0.282557	0.822133	-1.02335	-1.16337	0.363993	0.284813	0.54544	N	0.147014	0.123874	N	4	2.63326	0.0491856	0.114355	0.0884841	-0.647498	-0.585447	-0.836887	-0.936607	-0.181474	-0.10408
7305075	P97855	Ras GTPase-activating protein-binding protein 1 (G3BP-1) (EC 3.6.4.12) (EC 3.6.4.13) (ATP-dependent DNA helicase VIII) (GAP SH3 domain-binding protein 1) (HDH-VIII)	G3bp1	-0.285415	0.820505	-1.9462	-1.77054	0.123494	0.122299	0.912577	N	0.0798277	0.0711569	N	4	2.63326	0.0491856	0.0322604	0.0389794	0.620821	0.387293	0.437742	0.991687	0.763289	0.547126
569001008	P62858	40S ribosomal protein S28	Rps28	-0.287523	0.819307	-1.65894	-1.62958	0.172467	0.149578	0.825133	N	0.0924874	0.0805017	N	4	2.63326	0.0491856	0.0450585	0.0466969	-0.446322	-0.740885	-0.270637	-0.222464	-0.00413436	-0.368676
568907872	UPI0003D775FE	obscurin-like protein 1 isoform X1	Obsl1	-0.287631	0.819246	-2.38937	-1.95007	0.075219	0.0944458	1.02482	N	0.0638922	0.0618873	N	4	2.63326	0.0491856	0.0217367	0.0326333	-0.384261	-0.73475	-0.652672	-0.379326	-0.338842	-0.190623
256773209	Q3THW5	Histone H2A.V (H2A.F/Z)	H2afv	-0.2884	0.81881	-6.23367	-2.41106	0.00337375	0.0486109	1.31327	Y	0.0432996	0.0449704	Y	4	2.63326	0.0491856	0.00321066	0.0214617	2.24676	2.30875	2.1937	2.56365	2.57654	2.47422
264681528	Q8CGY6	Protein unc-45 homolog B (Unc-45B)	Unc45b	-0.288611	0.81869	-1.7986	-1.70826	0.146477	0.133708	0.873843	N	0.0852984	0.075004	N	4	2.63326	0.0491856	0.0386233	0.0428163	0.304214	-0.097029	-0.0214281	0.173215	0.529781	0.348594
169790909	Q9D7N3	28S ribosomal protein S9, mitochondrial (MRP-S9) (S9mt)	Mrps9	-0.288736	0.818619	-1.58948	-1.59147	0.187154	0.157887	0.801653	N	0.0958153	0.0832891	N	4	2.63326	0.0491856	0.0494974	0.0493736	0.250063	0.514435	0.371346	0.352955	0.738825	0.910272
124249066	Q0VBL3	RNA-binding motif protein 15	Rbm15	-0.289067	0.818431	-3.0241	-2.12372	0.0390058	0.0734993	1.13372	N	0.0482472	0.0543789	N	4	2.63326	0.0491856	0.0137055	0.0277904	-2.18106	-2.24453	-2.15996	-1.86368	-1.77202	-2.08265
568920137	UPI0003D6F61D	laminin subunit alpha-5 isoform X1	Lama5	-0.291138	0.817257	-2.32278	-1.94132	0.08089	0.0956459	1.01933	N	0.0659588	0.0621228	N	4	2.63326	0.0491856	0.0235653	0.033736	-0.00341479	-0.35013	-0.368627	0.120923	0.0480169	-0.0176991
226437625	Q5DTJ9	Myopalladin	Mypn	-0.292002	0.816768	-1.71017	-1.66934	0.162409	0.141347	0.849712	N	0.0884439	0.0778392	N	4	2.63326	0.0491856	0.0437306	0.0458962	-0.0424249	-0.467301	-0.39052	-0.169403	0.201726	-0.0565619
13386026	Q9CQE8	UPF0568 protein C14orf166 homolog	0	-0.292092	0.816717	-4.22906	-2.3169	0.0133802	0.0556401	1.25461	N	0.0432996	0.0476127	Y	4	2.63326	0.0491856	0.00715558	0.0238406	1.00594	0.892631	0.990232	1.15129	1.25718	1.35661
329299032	B7ZN28	Papilin (Papln protein)	Papln	-0.293226	0.816075	-1.38401	-1.46457	0.238569	0.188763	0.724084	N	0.110307	0.0926997	N	4	2.63326	0.0491856	0.0673319	0.0601282	-0.349841	-0.943206	-1.00204	-0.396852	-0.52658	-0.491977
568923916	UPI0003D7698F	serine/arginine-rich splicing factor 11 isoform X1	Srsf11	-0.295384	0.814856	-2.86455	-2.11914	0.0457192	0.0739862	1.13085	N	0.051551	0.0543789	N	4	2.63326	0.0491856	0.0159497	0.0291436	0.554167	0.490602	0.73017	0.861931	1.02617	0.772989
160333753	Q8BX02	KN motif and ankyrin repeat domain-containing protein 2 (Ankyrin repeat domain-containing protein 25)	Kank2	-0.297236	0.81381	-2.90278	-2.13735	0.0439953	0.0720673	1.14226	N	0.0505329	0.0543347	N	4	2.63326	0.0491856	0.0157278	0.0290098	-0.0739208	-0.191888	-0.299342	-0.0437884	0.220785	0.149561
568931763	UPI00015DF2D2	60S ribosomal protein L11 isoform X1	Rpl11	-0.298184	0.813276	-3.15459	-2.19795	0.034362	0.0660337	1.18023	N	0.0455507	0.0517225	N	4	2.63326	0.0491856	0.0134021	0.0276074	0.485507	0.337872	0.489154	0.638525	0.895065	0.673494
594140560	Q80X90	Filamin-B (FLN-B) (ABP-280-like protein) (Actin-binding-like protein) (Beta-filamin)	Flnb	-0.298675	0.812999	-1.47864	-1.53987	0.213316	0.16983	0.769986	N	0.102114	0.0870228	N	4	2.63326	0.0491856	0.0612012	0.0564313	-0.0257462	-0.0543846	-0.0712411	-0.152471	0.41035	0.486773
755528492	UPI0005AB9F0B	transcription activator BRG1 isoform X5	Smarca4	-0.298773	0.812943	-0.950767	-1.10912	0.395562	0.305964	0.514329	N	0.154986	0.130422	N	4	2.63326	0.0491856	0.148124	0.108848	-2.1754	-2.6389	-2.15665	-2.28313	-1.4815	-2.31
31981690	P63017	Heat shock cognate 71 kDa protein (Heat shock 70 kDa protein 8)	Hspa8	-0.299641	0.812455	-2.91968	-2.15305	0.0432573	0.0704521	1.15211	N	0.0499372	0.0534703	N	4	2.63326	0.0491856	0.0157988	0.0290526	0.714768	0.520782	0.550954	0.783759	1.05759	0.844078
568990402	P11031	Activated RNA polymerase II transcriptional coactivator p15 (Positive cofactor 4) (PC4) (SUB1 homolog) (Single-stranded DNA-binding protein p9) (p14)	Sub1	-0.300225	0.812126	-2.47534	-2.0293	0.0685531	0.0842368	1.0745	N	0.0608215	0.0581153	N	4	2.63326	0.0491856	0.0220657	0.0328317	-0.792229	-0.567322	-0.604115	-0.547514	-0.29758	-0.217896
755542186	UPI0005AB960A	enhancer of rudimentary homolog isoform X1;enhancer of rudimentary homolog isoform X1	Erh;Erh	-0.300575	0.811929	-1.28744	-1.40318	0.267383	0.2056	0.686977	N	0.119552	0.0985644	N	4	2.63326	0.0491856	0.0817603	0.0688289	0.622685	0.146317	0.358156	1.02066	0.636839	0.371383
21312594	Q9D023	Mitochondrial pyruvate carrier 2 (Brain protein 44)	Mpc2	-0.300857	0.81177	-2.73083	-2.10972	0.0523984	0.075	1.12494	N	0.0541287	0.0545655	N	4	2.63326	0.0491856	0.0182064	0.0305045	0.551406	0.589105	0.330846	0.651434	0.813519	0.908976
6679108	Q61937	Nucleophosmin (NPM) (Nucleolar phosphoprotein B23) (Nucleolar protein NO38) (Numatrin)	Npm1	-0.301871	0.8112	-3.60437	-2.29861	0.0226699	0.0571219	1.2432	N	0.0432996	0.0483379	Y	4	2.63326	0.0491856	0.0105215	0.0258703	0.031127	-0.162375	-0.0135078	0.24826	0.360006	0.152591
162138894	Q8C0C7	Phenylalanine--tRNA ligase alpha subunit (EC 6.1.1.20) (Phenylalanyl-tRNA synthetase alpha subunit) (PheRS)	Farsa	-0.302677	0.810747	-5.4995	-2.48432	0.00532987	0.0437801	1.35872	Y	0.0432996	0.0426938	Y	4	2.63326	0.0491856	0.00454362	0.0222655	0.3642	0.197358	0.327796	0.564554	0.638659	0.594171
568930624	Q3TEA8	Heterochromatin protein 1-binding protein 3	Hp1bp3	-0.304006	0.81	-2.98211	-2.18919	0.040654	0.0668725	1.17475	N	0.0485152	0.0521095	N	4	2.63326	0.0491856	0.0155887	0.0289259	-0.516156	-0.558265	-0.583795	-0.422851	-0.246954	-0.0763931
146231985	Q9JIX8	Apoptotic chromatin condensation inducer in the nucleus (Acinus)	Acin1	-0.304462	0.809744	-1.87459	-1.79021	0.134118	0.118895	0.924836	N	0.082427	0.0700459	N	4	2.63326	0.0491856	0.039568	0.043386	-0.957072	-1.41927	-1.40147	-0.988969	-0.839298	-1.03616
254553372	Q8BU30	Isoleucine--tRNA ligase, cytoplasmic (EC 6.1.1.5) (Isoleucyl-tRNA synthetase) (IRS) (IleRS)	Iars	-0.304973	0.809458	-0.897503	-1.06085	0.420188	0.32585	0.486982	N	0.162446	0.137042	N	4	2.63326	0.0491856	0.173198	0.123967	-1.17132	-1.42494	-0.930593	-1.37122	-0.932375	-0.30834
46430508	P62751	60S ribosomal protein L23a	Rpl23a	-0.305635	0.809086	-2.94502	-2.18803	0.0421776	0.0669845	1.17403	N	0.0492384	0.0521095	N	4	2.63326	0.0491856	0.0161554	0.0292677	1.21916	0.937476	1.26767	1.43195	1.47338	1.43588
755525609	Q9ET54	Palladin	Palld	-0.305642	0.809082	-1.6434	-1.66063	0.175645	0.143112	0.844324	N	0.0927244	0.0785031	N	4	2.63326	0.0491856	0.0518835	0.0508125	-0.0250682	-0.524413	-0.536718	-0.00628901	0.0476127	-0.210598
755530450	UPI0003D778DD	talin-2 isoform X1	Tln2	-0.306062	0.808847	-3.45151	-2.29669	0.0260186	0.0572801	1.242	N	0.0435604	0.0483379	Y	4	2.63326	0.0491856	0.0117949	0.0266382	0.29285	0.102811	0.0550737	0.541171	0.462521	0.365229
756761804	Q3UMU9	Hepatoma-derived growth factor-related protein 2 (HRP-2)	Hdgfl2	-0.307275	0.808167	-1.89554	-1.80866	0.13091	0.115785	0.936346	N	0.0814085	0.0689233	N	4	2.63326	0.0491856	0.0394166	0.0432947	-0.327827	-0.240059	0.00616309	-0.102295	0.12266	0.339738
28076933	Q921H9	Cytochrome c oxidase assembly factor 7 (Beta-lactamase hcp-like protein) (Respiratory chain assembly factor 1) (Sel1 repeat-containing protein 1)	Coa7	-0.307577	0.807998	-1.54185	-1.59871	0.19797	0.156276	0.806109	N	0.0985571	0.0830617	N	4	2.63326	0.0491856	0.0596918	0.0555211	0.80677	1.00975	0.884475	0.827086	1.40952	1.38712
459683845	UPI0002B8CE72	60S ribosomal protein L22 isoform b	Rpl22	-0.311261	0.805937	-2.74197	-2.15884	0.0518006	0.0698656	1.15574	N	0.0541287	0.0533803	N	4	2.63326	0.0491856	0.0193293	0.0311816	0.540985	0.628296	0.877466	1.02016	1.06758	0.89279
28372479	P62852	40S ribosomal protein S25	Rps25	-0.311717	0.805682	-1.76876	-1.7495	0.151659	0.126044	0.899479	N	0.0865115	0.0727548	N	4	2.63326	0.0491856	0.0465883	0.0476194	1.13758	0.805308	1.34865	1.28419	1.55177	1.39073
283046745	Q3UQS8	RNA-binding protein 20 (RNA-binding motif protein 20)	Rbm20	-0.312774	0.805092	-1.34758	-1.46627	0.249061	0.188313	0.72512	N	0.113303	0.0926118	N	4	2.63326	0.0491856	0.0808055	0.0682531	-0.872642	-0.830839	-0.68588	-0.889419	-0.111884	-0.449737
30794450	Q9D8E6	60S ribosomal protein L4	Rpl4	-0.312963	0.804987	-2.39327	-2.04902	0.0749015	0.0818715	1.08687	N	0.0638922	0.0573085	N	4	2.63326	0.0491856	0.0256505	0.0349934	0.216421	0.36009	0.410583	0.618047	0.855767	0.45217
569006432	Q61586	Glycerol-3-phosphate acyltransferase 1, mitochondrial (GPAT-1) (EC 2.3.1.15) (P90)	Gpam	-0.313503	0.804685	-0.797842	-0.962353	0.469645	0.369631	0.432232	N	0.175685	0.150263	N	4	2.63326	0.0491856	0.231602	0.159187	-2.91219	-2.01214	-2.36893	-2.66186	-1.65675	-2.03414
568915187	UPI0003D77E26	catenin delta-1 isoform X4	Ctnnd1	-0.314555	0.804099	-2.49181	-2.09116	0.0673539	0.0770366	1.1133	N	0.0607464	0.0556307	N	4	2.63326	0.0491856	0.0239032	0.0339398	-0.370302	-0.624491	-0.613243	-0.0385677	-0.267147	-0.358656
556503824	Q3TIV6	Lysine--tRNA ligase (EC 6.1.1.6) (Lysyl-tRNA synthetase)	Kars	-0.31563	0.8035	-1.90768	-1.83691	0.129091	0.111176	0.953988	N	0.0810203	0.0678335	N	4	2.63326	0.0491856	0.0410617	0.0442867	0.285468	0.13056	0.550312	0.417552	0.721286	0.774392
88196767	Q3V042	Myeloid leukemia factor 1, isoform CRA_c	Mlf1	-0.31662	0.802949	-3.7049	-2.39883	0.0207464	0.0494699	1.30566	Y	0.0432996	0.0452756	Y	4	2.63326	0.0491856	0.0109551	0.0261318	-0.918077	-0.919019	-0.910931	-0.769531	-0.500924	-0.527713
6677975	P62996	Transformer-2 protein homolog beta (TRA-2 beta) (TRA2-beta) (Silica-induced gene 41 protein) (SIG-41) (Splicing factor, arginine/serine-rich 10) (Transformer-2 protein homolog B)	Tra2b	-0.317574	0.802418	-2.07005	-1.92523	0.107224	0.0978914	1.00926	N	0.0747982	0.0629372	N	4	2.63326	0.0491856	0.0353036	0.0408145	0.136186	0.0921535	-0.051983	0.456165	0.573403	0.0995105
70780373	Q5RL57	A kinase (PRKA) anchor protein 8-like (A kinase (PRKA) anchor protein 8-like, isoform CRA_a) (A-kinase anchor protein 8-like)	Akap8l	-0.318677	0.801805	-1.65583	-1.69488	0.173097	0.136289	0.86554	N	0.092522	0.0758696	N	4	2.63326	0.0491856	0.0555594	0.0530292	-2.0007	-2.39457	-2.28306	-2.12888	-1.97871	-1.61471
6755560	P04919	Band 3 anion transport protein (Anion exchange protein 1) (AE 1) (Anion exchanger 1) (MEB3) (Solute carrier family 4 member 1) (CD antigen CD233)	Slc4a1	-0.318839	0.801715	-0.995454	-1.16516	0.375857	0.284136	0.546473	N	0.150445	0.123737	N	4	2.63326	0.0491856	0.153883	0.11232	-0.115156	0.406647	0.26046	0.0706278	1.02749	0.410349
6677783	P62889	60S ribosomal protein L30	Rpl30	-0.320621	0.800725	-8.92954	-2.72985	0.000869699	0.0309306	1.50961	Y	0.042108	0.0355277	Y	4	2.63326	0.0491856	0.00193382	0.0206918	-0.514708	-0.525734	-0.44126	-0.210317	-0.12774	-0.181783
19745144	Q01147	Cyclic AMP-responsive element-binding protein 1 (CREB-1) (cAMP-responsive element-binding protein 1)	Creb1	-0.321781	0.800082	-4.19265	-2.49983	0.0137771	0.042823	1.36832	Y	0.0432996	0.0424055	Y	4	2.63326	0.0491856	0.00883558	0.0248537	-0.471224	-0.636632	-0.574608	-0.303219	-0.119776	-0.294126
162287296	Q9CWZ3	RNA-binding protein 8A (RNA-binding motif protein 8A) (Ribonucleoprotein RBM8A)	Rbm8a	-0.32197	0.799977	-1.9244	-1.86209	0.126629	0.107219	0.96973	N	0.0802181	0.0665427	N	4	2.63326	0.0491856	0.0419887	0.0448457	-1.66502	-1.70846	-1.60753	-1.45668	-1.54551	-1.01291
569001949	Q8BTI8	Serine/arginine repetitive matrix protein 2	Srrm2	-0.322563	0.799648	-1.71104	-1.73793	0.162242	0.12815	0.892281	N	0.0884439	0.0732734	N	4	2.63326	0.0491856	0.0533086	0.0516719	-1.27628	-1.45954	-1.62784	-1.348	-1.22574	-0.822231
356995868	Q9Z1N5	Spliceosome RNA helicase Ddx39b (EC 3.6.4.13) (56 kDa U2AF65-associated protein) (DEAD box protein UAP56) (HLA-B-associated transcript 1 protein)	Ddx39b	-0.322703	0.799571	-2.25946	-2.0281	0.086732	0.0843824	1.07375	N	0.0683402	0.0581153	N	4	2.63326	0.0491856	0.0305975	0.0379766	-1.09117	-0.880645	-0.971077	-0.884823	-0.652423	-0.437538
755493774	E9QNN1	ATP-dependent RNA helicase A	Dhx9	-0.322778	0.799529	-5.35774	-2.61758	0.00585516	0.0362306	1.44092	Y	0.0432996	0.0386794	Y	4	2.63326	0.0491856	0.00544422	0.0228086	-0.012848	-0.153051	0.0394357	0.249543	0.280133	0.312195
550544230	H3BKH6	S-formylglutathione hydrolase (EC 3.1.2.12)	Esd	-0.323802	0.798961	-3.03596	-2.29672	0.0385544	0.0572779	1.24201	N	0.0480395	0.0483379	Y	4	2.63326	0.0491856	0.0170631	0.0298151	-0.387301	-0.64957	-0.600708	-0.180466	-0.358509	-0.127197
240255600	Q8R2Z5	von Willebrand factor A domain-containing protein 1 (von Willebrand factor A domain-related protein)	Vwa1	-0.327222	0.79707	-2.02491	-1.92937	0.112864	0.0973094	1.01185	N	0.0764111	0.0628455	N	4	2.63326	0.0491856	0.0391708	0.0431465	0.36648	-0.0363102	-0.142981	0.381896	0.471595	0.315363
158508674	O08810	116 kDa U5 small nuclear ribonucleoprotein component (Elongation factor Tu GTP-binding domain-containing protein 2) (U5 snRNP-specific protein, 116 kDa) (U5-116 kDa)	Eftud2	-0.328025	0.796626	-3.71734	-2.46471	0.020522	0.0450223	1.34657	Y	0.0432996	0.0430467	Y	4	2.63326	0.0491856	0.0116799	0.0265689	-0.507884	-0.475948	-0.503895	-0.325513	-0.155566	-0.0225722
160333553	P35979	60S ribosomal protein L12	Rpl12	-0.328382	0.796429	-3.91714	-2.4999	0.0172893	0.042819	1.36836	Y	0.0432996	0.0424055	Y	4	2.63326	0.0491856	0.0105417	0.0258825	0.615807	0.404538	0.64721	0.841919	0.95358	0.857203
357394934	Q99K48	Non-POU domain-containing octamer-binding protein (NonO protein)	Nono	-0.328448	0.796393	-7.3339	-2.7537	0.00183998	0.0299134	1.52413	Y	0.0432996	0.0349457	Y	4	2.63326	0.0491856	0.00300854	0.0213398	0.539375	0.515866	0.570267	0.863282	0.946145	0.801426
254939694	Q9D883	Splicing factor U2AF 35 kDa subunit (U2 auxiliary factor 35 kDa subunit) (U2 snRNP auxiliary factor small subunit)	U2af1	-0.330578	0.795218	-6.51469	-2.73871	0.0028659	0.0305484	1.51501	Y	0.0432996	0.0353257	Y	4	2.63326	0.0491856	0.00386235	0.0218547	0.222898	0.247786	0.337545	0.533668	0.661242	0.605052
42558248	Q60865	Caprin-1 (Cytoplasmic activation- and proliferation-associated protein 1) (GPI-anchored membrane protein 1) (GPI-anchored protein p137) (GPI-p137) (p137GPI) (Membrane component chromosome 11 surface marker 1) (RNA granule protein 105)	Caprin1	-0.330894	0.795044	-1.41607	-1.54376	0.229694	0.168902	0.772366	N	0.107759	0.0870228	N	4	2.63326	0.0491856	0.0819024	0.0689146	0.23175	-0.303984	0.0145568	0.490395	0.481609	-0.0369996
55741555	Q9D1R9	60S ribosomal protein L34	Rpl34	-0.332331	0.794252	-1.74354	-1.77828	0.15619	0.120948	0.9174	N	0.0870134	0.0710111	N	4	2.63326	0.0491856	0.0544963	0.0523881	-0.0080875	-0.132882	0.0507494	-0.0557763	0.544983	0.417566
254028217	Q60936	Atypical kinase COQ8A, mitochondrial (EC 2.7.-.-) (Chaperone activity of bc1 complex-like) (Chaperone-ABC1-like) (Coenzyme Q protein 8A) (aarF domain-containing protein kinase 3)	Coq8a	-0.332453	0.794185	-1.65181	-1.71806	0.173916	0.131847	0.879929	N	0.0925325	0.0748321	N	4	2.63326	0.0491856	0.0607615	0.0561661	0.0492609	-0.249032	-0.213585	-0.15743	0.415322	0.32611
568971474	Q8BTS0	DEAD (Asp-Glu-Ala-Asp) box polypeptide 5 (MCG2872, isoform CRA_a) (Probable ATP-dependent RNA helicase DDX5)	Ddx5	-0.332753	0.79402	-4.60154	-2.61675	0.0100193	0.0362735	1.44041	Y	0.0432996	0.0386794	Y	4	2.63326	0.0491856	0.00784387	0.0242557	0.29285	0.181002	0.330863	0.495901	0.690086	0.616988
229577004	Q9D009	Putative lipoyltransferase 2, mitochondrial (EC 2.3.1.181) (Lipoate-protein ligase B) (Lipoyl/octanoyl transferase) (Octanoyl-[acyl-carrier-protein]-protein N-octanoyltransferase)	Lipt2	-0.3335	0.793609	-0.959104	-1.1377	0.39182	0.294665	0.530671	N	0.154233	0.126869	N	4	2.63326	0.0491856	0.181364	0.128892	-0.623092	-0.254122	-0.364058	-0.694102	0.0163387	0.43699
1039729515	Q8VEK3	Heterogeneous nuclear ribonucleoprotein U (hnRNP U) (Scaffold-attachment factor A) (SAF-A)	Hnrnpu	-0.33448	0.79307	-2.99935	-2.33518	0.0399678	0.0541981	1.26602	N	0.0485152	0.0469659	Y	4	2.63326	0.0491856	0.0186543	0.0307746	0.199689	0.505316	0.478726	0.707796	0.648546	0.83083
183979966	Q05793	Basement membrane-specific heparan sulfate proteoglycan core protein (HSPG) [Cleaved into: Endorepellin; LG3 peptide]	Hspg2	-0.335297	0.792621	-1.74189	-1.78308	0.156492	0.120118	0.920391	N	0.0870134	0.0706449	N	4	2.63326	0.0491856	0.0555789	0.0530409	0.381717	-0.10492	-0.0992094	0.529494	0.466513	0.187473
21450129	Q8QZT1	Acetyl-CoA acetyltransferase, mitochondrial (EC 2.3.1.9) (Acetoacetyl-CoA thiolase)	Acat1	-0.335689	0.792406	-2.43141	-2.14413	0.0718714	0.071365	1.14651	N	0.0623241	0.053924	N	4	2.63326	0.0491856	0.0285922	0.0367674	0.717246	0.520637	0.450551	1.11744	0.83505	0.74301
568986227	D3Z1D3	RIKEN cDNA 3425401B19 gene	3425401B19Rik	-0.33609	0.792185	-0.981209	-1.16124	0.382044	0.285622	0.544208	N	0.151811	0.123975	N	4	2.63326	0.0491856	0.175986	0.125649	-1.79325	-2.30311	-1.85189	-2.24309	-1.26275	-1.43414
153791358	G5E866	Splicing factor 3B subunit 1 (Splicing factor 3b, subunit 1)	Sf3b1	-0.336355	0.79204	-2.46809	-2.16142	0.0690882	0.0696061	1.15735	N	0.0609769	0.0533803	N	4	2.63326	0.0491856	0.0278589	0.0363251	-0.698616	-0.64957	-0.77596	-0.631969	-0.270713	-0.2124
568921564	UPI0003D6F0A9	ankyrin-2 isoform X23	Ank2	-0.339187	0.790487	-2.60463	-2.22479	0.0597561	0.0635269	1.19704	N	0.0573721	0.0502187	N	4	2.63326	0.0491856	0.0254375	0.034865	-1.85591	-2.19484	-2.0743	-1.59588	-1.64252	-1.86909
31982273	P51660	Peroxisomal multifunctional enzyme type 2 (MFE-2) (17-beta-hydroxysteroid dehydrogenase 4) (17-beta-HSD 4) (D-bifunctional protein) (DBP) (Multifunctional protein 2) (MPF-2) [Cleaved into: (3R)-hydroxyacyl-CoA dehydrogenase (EC 1.1.1.n12); Enoyl-CoA hydratase 2 (EC 4.2.1.107) (EC 4.2.1.119) (3-alpha,7-alpha,12-alpha-trihydroxy-5-beta-cholest-24-enoyl-CoA hydratase)]	Hsd17b4	-0.340969	0.789511	-1.48694	-1.61227	0.211235	0.1533	0.814458	N	0.101705	0.081734	N	4	2.63326	0.0491856	0.0788742	0.0670885	0.381264	0.32348	0.346687	0.234323	0.906536	0.93348
115270960	Q9JLV1	BAG family molecular chaperone regulator 3 (BAG-3) (Bcl-2-associated athanogene 3) (Bcl-2-binding protein Bis)	Bag3	-0.34097	0.78951	-2.20996	-2.06093	0.0916305	0.0804747	1.09434	N	0.0709021	0.0568369	N	4	2.63326	0.0491856	0.0357072	0.0410579	0.734132	0.338239	0.298447	0.664316	0.867224	0.862188
24762230	P62245	40S ribosomal protein S15a	Rps15a	-0.341403	0.789273	-1.45763	-1.59012	0.218681	0.158191	0.800818	N	0.104387	0.0833035	N	4	2.63326	0.0491856	0.0822868	0.0691463	0.307038	0.0676403	0.269424	0.112708	0.754355	0.801249
118403314	Q8VH51	RNA-binding protein 39 (Coactivator of activating protein 1 and estrogen receptors) (Coactivator of AP-1 and ERs) (RNA-binding motif protein 39) (RNA-binding region-containing protein 2) (Transcription coactivator CAPER)	Rbm39	-0.342144	0.788868	-3.58639	-2.51513	0.0230358	0.0419002	1.37778	Y	0.0433315	0.0418225	Y	4	2.63326	0.0491856	0.0136519	0.027758	0.224591	0.111538	0.20189	0.343653	0.613468	0.607329
6681225	P32233	Developmentally-regulated GTP-binding protein 1 (DRG-1) (Neural precursor cell expressed developmentally down-regulated protein 3) (NEDD-3)	Drg1	-0.344361	0.787657	-2.28	-2.10458	0.084787	0.0755589	1.12171	N	0.0681161	0.0547947	N	4	2.63326	0.0491856	0.0342178	0.0401597	-0.817707	-0.642363	-0.481365	-0.160768	-0.215644	-0.531939
36031035	Q9CW03	Structural maintenance of chromosomes protein 3 (SMC protein 3) (SMC-3) (Basement membrane-associated chondroitin proteoglycan) (Bamacan) (Chondroitin sulfate proteoglycan 6) (Chromosome segregation protein SmcD) (Mad member-interacting protein 1)	Smc3	-0.347458	0.785968	-4.96787	-2.74974	0.00766308	0.0300798	1.52173	Y	0.0432996	0.0350205	Y	4	2.63326	0.0491856	0.00733764	0.0239504	-0.704059	-0.83862	-0.766811	-0.505665	-0.450999	-0.310451
557786134	Q8R2K3	Single-stranded DNA binding protein 1 (Single-stranded DNA binding protein 1, isoform CRA_a) (Single-stranded DNA-binding protein, mitochondrial)	Ssbp1	-0.349818	0.784683	-5.02678	-2.77097	0.00735017	0.0291991	1.53463	Y	0.0432996	0.0345552	Y	4	2.63326	0.0491856	0.00726433	0.0239062	0.98311	0.842027	0.91097	1.34857	1.28104	1.15595
755560424	P26231	Catenin alpha-1 (102 kDa cadherin-associated protein) (Alpha E-catenin) (CAP102)	Ctnna1	-0.352238	0.783368	-2.58924	-2.26535	0.0607326	0.0599224	1.22241	N	0.0576563	0.049305	Y	4	2.63326	0.0491856	0.02776	0.0362655	0.593549	0.366689	0.200802	0.878872	0.624417	0.714465
568975110	UPI00000EA012	heterogeneous nuclear ribonucleoprotein H isoform 1	Hnrnph1	-0.352777	0.783075	-7.45081	-2.94298	0.00173342	0.0229955	1.63836	Y	0.0432996	0.0339273	Y	4	2.63326	0.0491856	0.00336267	0.0215534	-0.695934	-0.851707	-0.796821	-0.433264	-0.448047	-0.40482
13385196	Q9CRD2	ER membrane protein complex subunit 2 (Tetratricopeptide repeat protein 35) (TPR repeat protein 35)	Emc2	-0.358386	0.780037	-2.45123	-2.22658	0.070352	0.0633635	1.19816	N	0.0617707	0.0502187	N	4	2.63326	0.0491856	0.0320645	0.0388612	-0.87602	-1.12517	-0.902366	-0.82905	-0.595752	-0.403596
13430890	P43274	Histone H1.4 (H1 VAR.2) (H1e)	Hist1h1e	-0.359576	0.779394	-1.55178	-1.68766	0.195663	0.137701	0.861064	N	0.0985343	0.0763917	N	4	2.63326	0.0491856	0.0805402	0.0680931	1.19715	0.771945	0.817303	0.920886	1.39952	1.54472
1039761030	UPI0007EC799C	U5 small nuclear ribonucleoprotein 200 kDa helicase isoform X1	Snrnp200	-0.360679	0.778798	-3.14113	-2.49084	0.0348098	0.0433754	1.36276	Y	0.0455507	0.0425416	Y	4	2.63326	0.0491856	0.0197771	0.0314516	-0.0520429	-0.328412	-0.266583	0.108582	0.0308418	0.295576
219842353	Q8CJG0	Protein argonaute-2 (Argonaute2) (mAgo2) (EC 3.1.26.n2) (Argonaute RISC catalytic component 2) (Eukaryotic translation initiation factor 2C 2) (eIF-2C 2) (eIF2C 2) (Piwi/argonaute family protein meIF2C2) (Protein slicer)	Ago2	-0.362203	0.777975	-0.926096	-1.11641	0.406813	0.303048	0.518489	N	0.158114	0.129501	N	4	2.63326	0.0491856	0.229448	0.157888	-0.160484	-0.433033	-0.0686112	-0.564273	0.272129	0.716626
597955343	A2AVR9	Dynein light chain roadblock	Dynlrb1	-0.363457	0.7773	-3.94434	-2.69877	0.0168981	0.0323106	1.49065	Y	0.0432996	0.0365347	Y	4	2.63326	0.0491856	0.0127365	0.027206	0.0221486	-0.0586403	-0.0818654	0.159761	0.358585	0.453667
409264643	Q9D823	60S ribosomal protein L37	Rpl37	-0.363771	0.777131	-0.745737	-0.919524	0.497264	0.390035	0.408897	N	0.183735	0.155601	N	4	2.63326	0.0491856	0.356924	0.234758	0.907591	0.456108	0.647219	0.638525	1.97019	0.493515
755532233	UPI0003D77522	leucine-rich repeat flightless-interacting protein 2 isoform X2	Lrrfip2	-0.364727	0.776616	-6.08672	-2.96005	0.00368339	0.0224613	1.64856	Y	0.0432996	0.0335557	Y	4	2.63326	0.0491856	0.00538594	0.0227735	-0.295387	-0.400374	-0.454983	0.0421809	-0.0119722	-0.086771
110350660	Q80WW9	DDRGK domain-containing protein 1 (UFM1-binding and PCI domain-containing protein 1)	Ddrgk1	-0.367047	0.775368	-1.39808	-1.57109	0.234633	0.162507	0.789128	N	0.109232	0.0846923	N	4	2.63326	0.0491856	0.103389	0.0818713	-0.883727	-0.688564	-0.442933	-0.730518	0.0565284	-0.240092
46249419	Q8CG19	Latent-transforming growth factor beta-binding protein 1 (LTBP-1) (Transforming growth factor beta-1-binding protein 1) (TGF-beta1-BP-1)	Ltbp1	-0.36743	0.775162	-0.555275	-0.698059	0.608295	0.508862	0.2934	N	0.212538	0.189944	N	4	2.63326	0.0491856	0.656785	0.415581	-1.19822	-2.55466	-1.75185	-2.49936	-1.17477	-0.728311
228480241	O88441	Metaxin-2 (Mitochondrial outer membrane import complex protein 2)	Mtx2	-0.370061	0.77375	-1.89309	-1.94877	0.131281	0.0946229	1.024	N	0.0814897	0.0618873	N	4	2.63326	0.0491856	0.0573184	0.0540899	1.46753	0.95703	0.963117	1.30777	1.63084	1.55925
118601017	O08788	Dynactin subunit 1 (150 kDa dynein-associated polypeptide) (DAP-150) (DP-150) (p150-glued)	Dctn1	-0.370849	0.773327	-1.97839	-2.00515	0.119021	0.0872263	1.05935	N	0.0781748	0.0587919	N	4	2.63326	0.0491856	0.0527062	0.0513086	-0.00458156	-0.268102	-0.183971	-0.0474664	0.166774	0.536584
163954941	Q61584	Fragile X mental retardation syndrome-related protein 1 (mFxr1p)	Fxr1	-0.372939	0.772208	-5.93529	-3.00544	0.0040398	0.0211043	1.67563	Y	0.0432996	0.0328355	Y	4	2.63326	0.0491856	0.00592221	0.0230968	-0.510097	-0.703783	-0.597454	-0.186693	-0.284124	-0.221699
118026911	Q5SYD0	Unconventional myosin-Id	Myo1d	-0.37306	0.772143	-2.66928	-2.36913	0.0558477	0.0516209	1.28717	N	0.0556335	0.0461341	Y	4	2.63326	0.0491856	0.0292994	0.0371938	0.0680473	-0.0230812	-0.0539321	0.10668	0.451317	0.552216
397174798	A0A087WR45	Proline-rich basic protein 1	Prob1	-0.373312	0.772008	-3.53761	-2.65756	0.0240651	0.0342413	1.46545	Y	0.0433834	0.0376228	Y	4	2.63326	0.0491856	0.0167038	0.0295984	-0.646274	-0.861615	-0.938821	-0.35463	-0.417789	-0.554355
755533911	UPI0005ABAD29	ankyrin-3 isoform X1	Ank3	-0.374168	0.77155	-1.54235	-1.69889	0.197853	0.13551	0.86803	N	0.0985571	0.0756667	N	4	2.63326	0.0491856	0.0882797	0.0727602	-0.0237039	-0.280681	-0.542098	-0.265153	0.153532	0.387643
21539655	Q91YR7	Pre-mRNA-processing factor 6 (PRP6 homolog) (U5 snRNP-associated 102 kDa protein) (U5-102 kDa protein)	Prpf6	-0.376854	0.770115	-4.44228	-2.86047	0.011314	0.0257757	1.58879	Y	0.0432996	0.0340827	Y	4	2.63326	0.0491856	0.0107951	0.0260353	1.18031	0.908208	1.03222	1.39369	1.37761	1.48
568921544	UPI0003D74BD1	ankyrin-2 isoform X10	Ank2	-0.37917	0.76888	-1.16613	-1.36847	0.30835	0.215707	0.666136	N	0.131123	0.102226	N	4	2.63326	0.0491856	0.158586	0.115157	-2.10112	-1.63046	-2.30626	-2.1221	-1.25483	-1.5234
158631230	Q8R3Q0	Store-operated calcium entry-associated regulatory factor (SARAF) (SOCE-associated regulatory factor) (Transmembrane protein 66)	Saraf	-0.384648	0.765966	-2.34911	-2.25156	0.0785915	0.0611236	1.21379	N	0.0651247	0.0498122	Y	4	2.63326	0.0491856	0.0402171	0.0437774	-1.16549	-1.04142	-1.4634	-1.00025	-0.640386	-0.87573
568947548	Q62376	U1 small nuclear ribonucleoprotein 70 kDa (U1 snRNP 70 kDa) (U1-70K) (snRNP70)	Snrnp70	-0.386117	0.765187	-4.27989	-2.88395	0.0128488	0.0249499	1.60293	Y	0.0432996	0.0340827	Y	4	2.63326	0.0491856	0.0122085	0.0268876	1.0595	0.89862	1.07777	1.47718	1.45856	1.2585
568962025	UPI0003D6ED98	muscular LMNA-interacting protein isoform X15	Mlip	-0.386321	0.765078	-3.9724	-2.82352	0.0165056	0.0271344	1.56648	Y	0.0432996	0.0343866	Y	4	2.63326	0.0491856	0.0141868	0.0280806	-0.340427	-0.505568	-0.674483	-0.110087	-0.1059	-0.145527
121949765	Q61029	Lamina-associated polypeptide 2, isoforms beta/delta/epsilon/gamma (Thymopoietin isoforms beta/delta/epsilon/gamma) (TP beta/delta/epsilon/gamma)	Tmpo	-0.387333	0.764542	-4.12249	-2.86009	0.0145828	0.0257892	1.58856	Y	0.0432996	0.0340827	Y	4	2.63326	0.0491856	0.0132416	0.0275106	-0.180648	-0.228773	0.0431477	0.34507	0.250764	0.199892
13384788	Q99LM2	CDK5 regulatory subunit-associated protein 3	Cdk5rap3	-0.389421	0.763436	-3.94589	-2.83334	0.0168761	0.0267661	1.57241	Y	0.0432996	0.0343866	Y	4	2.63326	0.0491856	0.0146096	0.0283355	0.399088	0.322582	0.343501	0.55711	0.80175	0.874573
8567402	P84104	Serine/arginine-rich splicing factor 3 (Pre-mRNA-splicing factor SRP20) (Protein X16) (Splicing factor, arginine/serine-rich 3)	Srsf3	-0.389807	0.763232	-1.76396	-1.89162	0.152511	0.102753	0.988205	N	0.0867256	0.0654823	N	4	2.63326	0.0491856	0.073251	0.0636976	0.410198	0.395445	0.439117	0.426813	1.1909	0.796467
13385800	P62869	Elongin-B (EloB) (Elongin 18 kDa subunit) (RNA polymerase II transcription factor SIII subunit B) (SIII p18) (Transcription elongation factor B polypeptide 2)	Elob	-0.394139	0.760944	-3.13192	-2.62367	0.0351203	0.0359199	1.44467	Y	0.0457802	0.0386637	Y	4	2.63326	0.0491856	0.0237558	0.0338509	-1.19923	-1.51732	-1.39494	-1.0138	-0.813704	-1.10157
158854016	Q9WTX5	S-phase kinase-associated protein 1 (Cyclin-A/CDK2-associated protein p19) (S-phase kinase-associated protein 1A) (p19A) (p19skp1)	Skp1	-0.394775	0.760608	-3.9879	-2.86955	0.0162935	0.0254528	1.59426	Y	0.0432996	0.0340827	Y	4	2.63326	0.0491856	0.0146995	0.0283898	0.635347	0.494912	0.294338	0.863775	0.872345	0.872802
160333722	A2AKD7	Alpha-1-syntrophin	Snta1	-0.396509	0.759695	-2.33101	-2.2717	0.0801635	0.0593774	1.22638	N	0.0659436	0.0490926	Y	4	2.63326	0.0491856	0.0434019	0.0456979	0.487998	0.372383	0.015667	0.502394	0.767375	0.795805
568913214	UPI0003D70702	spectrin alpha chain, non-erythrocytic 1 isoform X6	Sptan1	-0.396537	0.75968	-2.25075	-2.22596	0.0875723	0.0634199	1.19777	N	0.0687031	0.0502187	N	4	2.63326	0.0491856	0.0465589	0.0476017	0.584398	0.175855	0.286284	0.869957	0.874971	0.491219
165932375	Q9CY58	Plasminogen activator inhibitor 1 RNA-binding protein (PAI1 RNA-binding protein 1) (PAI-RBP1) (SERPINE1 mRNA-binding protein 1)	Serbp1	-0.397198	0.759332	-4.99917	-3.06228	0.00749486	0.0195271	1.70936	Y	0.0432996	0.0317545	Y	4	2.63326	0.0491856	0.00946913	0.0252357	0.294298	0.0200545	0.151571	0.554695	0.540374	0.562448
111154063	Q08943	FACT complex subunit SSRP1 (Facilitates chromatin transcription complex subunit SSRP1) (Recombination signal sequence recognition protein 1) (Structure-specific recognition protein 1) (T160)	Ssrp1	-0.399198	0.75828	-3.92948	-2.87792	0.0171105	0.0251594	1.5993	Y	0.0432996	0.0340827	Y	4	2.63326	0.0491856	0.0154809	0.028861	0.579728	0.398743	0.56574	0.789131	0.880733	1.07194
61098124	Q80VD1	Protein FAM98B	Fam98b	-0.399213	0.758272	-1.55793	-1.74044	0.194248	0.12769	0.893843	N	0.0981129	0.0732734	N	4	2.63326	0.0491856	0.0984923	0.0789186	0.337566	0.379416	0.628754	0.373064	1.1415	1.02881
568933177	UPI00002178AE	dnaJ homolog subfamily B member 6 isoform X1	Dnajb6	-0.39924	0.758258	-1.93628	-2.03066	0.12491	0.0840716	1.07535	N	0.080027	0.0581153	N	4	2.63326	0.0491856	0.063771	0.0579809	-0.0629404	-0.499877	-0.600708	0.247887	-0.0445235	-0.16917
148747424	P48962	ADP/ATP translocase 1 (ADP,ATP carrier protein 1) (ADP,ATP carrier protein, heart/skeletal muscle isoform T1) (Adenine nucleotide translocator 1) (ANT 1) (Solute carrier family 25 member 4) (mANC1)	Slc25a4	-0.399532	0.758104	-1.99868	-2.07389	0.116292	0.0789824	1.10247	N	0.0776377	0.0564179	N	4	2.63326	0.0491856	0.0599389	0.0556701	0.621045	0.59166	0.546352	0.594953	1.24333	1.11937
568917838	E9Q8Q6	Coiled-coil domain-containing 141	Ccdc141	-0.399964	0.757877	-4.18325	-2.93825	0.0138819	0.0231462	1.63552	Y	0.0432996	0.0340031	Y	4	2.63326	0.0491856	0.0137122	0.0277944	-0.228921	-0.405901	-0.558791	0.00851503	-0.0130125	0.0107761
25141233	Q8K310	Matrin-3	Matr3	-0.401969	0.756825	-3.62708	-2.81273	0.0222172	0.0275455	1.55995	Y	0.0432996	0.0343866	Y	4	2.63326	0.0491856	0.018423	0.0306351	-0.3775	-0.421486	-0.344962	-0.094264	0.237694	-0.081472
568932664	UPI0000D66057	small nuclear ribonucleoprotein F	LOC102638183	-0.402607	0.75649	-4.90545	-3.0807	0.00801256	0.0190433	1.72026	Y	0.0432996	0.0313348	Y	4	2.63326	0.0491856	0.0101041	0.0256186	-0.544726	-0.632361	-0.397892	-0.191614	-0.138543	-0.0369996
163965357	P70670	Nascent polypeptide-associated complex subunit alpha, muscle-specific form (Alpha-NAC, muscle-specific form) (skNAC)	Naca	-0.403792	0.755869	-3.6552	-2.82876	0.0216717	0.0269372	1.56965	Y	0.0432996	0.0343866	Y	4	2.63326	0.0491856	0.0183056	0.0305643	0.795418	0.624642	0.897783	1.04567	1.3107	1.17285
1039728362	UPI0007ED4991	tensin-1 isoform X7	Tns1	-0.404526	0.755484	-1.70654	-1.86791	0.163101	0.106324	0.973369	N	0.0884439	0.0664378	N	4	2.63326	0.0491856	0.0842856	0.0703517	0.170005	0.195217	0.0986839	0.127462	0.937156	0.612867
211065507	Q922B2	Aspartate--tRNA ligase, cytoplasmic (EC 6.1.1.12) (Aspartyl-tRNA synthetase) (AspRS)	Dars	-0.404834	0.755323	-1.7209	-1.87963	0.160381	0.104544	0.9807	N	0.0880969	0.0659015	N	4	2.63326	0.0491856	0.0830106	0.0695828	-0.628586	-0.827452	-0.570406	-0.709971	0.00468948	-0.106661
283806543	Q8R0G9	Nuclear pore complex protein Nup133 (133 kDa nucleoporin) (Nucleoporin Nup133)	Nup133	-0.40488	0.755299	-3.40991	-2.76006	0.0270295	0.0296482	1.528	Y	0.0435604	0.0347545	Y	4	2.63326	0.0491856	0.0211474	0.032278	-1.16752	-1.29945	-1.18397	-1.0174	-0.635186	-0.783713
8392847	P61164	Alpha-centractin (Centractin) (ARP1) (Actin-RPV) (Centrosome-associated actin homolog)	Actr1a	-0.404948	0.755264	-5.17626	-3.13286	0.00662334	0.0177423	1.75099	Y	0.0432996	0.0305176	Y	4	2.63326	0.0491856	0.0091803	0.0250616	-0.742404	-1.01036	-0.895944	-0.48042	-0.460037	-0.493407
134288917	Q9JHU4	Cytoplasmic dynein 1 heavy chain 1 (Cytoplasmic dynein heavy chain 1) (Dynein heavy chain, cytosolic)	Dync1h1	-0.406252	0.754581	-3.84302	-2.89033	0.018412	0.0247303	1.60677	Y	0.0432996	0.0340827	Y	4	2.63326	0.0491856	0.0167625	0.0296338	0.0660301	-0.0129647	0.0550754	0.246386	0.486341	0.594171
41152517	Q9QZQ8	Core histone macro-H2A.1 (Histone macroH2A1) (mH2A1) (H2A.y) (H2A/y)	H2afy	-0.406516	0.754443	-3.61294	-2.82881	0.0224977	0.0269355	1.56967	Y	0.0432996	0.0343866	Y	4	2.63326	0.0491856	0.01899	0.030977	0.33863	0.130561	0.301286	0.50492	0.825324	0.65978
258613892	Q9CU62	Structural maintenance of chromosomes protein 1A (SMC protein 1A) (SMC-1-alpha) (SMC-1A) (Chromosome segregation protein SmcB) (Sb1.8)	Smc1a	-0.406565	0.754418	-6.79269	-3.30013	0.00245302	0.0141755	1.84846	Y	0.0432996	0.0285171	Y	4	2.63326	0.0491856	0.00537361	0.022766	-0.936689	-1.00188	-0.855778	-0.606673	-0.503307	-0.464673
31982373	P35550	rRNA 2'-O-methyltransferase fibrillarin (EC 2.1.1.-) (Histone-glutamine methyltransferase) (Nucleolar protein 1)	Fbl	-0.409169	0.753057	-5.73316	-3.22585	0.00458405	0.0156536	1.80539	Y	0.0432996	0.0289057	Y	4	2.63326	0.0491856	0.00764027	0.0241329	-0.413407	-0.561881	-0.405301	-0.00841087	-0.150739	0.00606906
124249341	Q3UMT1	Protein phosphatase 1 regulatory subunit 12C (Protein phosphatase 1 myosin-binding subunit of 85 kDa) (Protein phosphatase 1 myosin-binding subunit p85)	Ppp1r12c	-0.409949	0.75265	-1.41539	-1.6255	0.229879	0.150446	0.822618	N	0.107759	0.0805081	N	4	2.63326	0.0491856	0.125834	0.0954064	0.685734	-0.0680817	-0.124638	0.324041	0.702731	0.69609
21426889	P62281	40S ribosomal protein S11	Rps11	-0.411997	0.751582	-3.08404	-2.67177	0.0367869	0.0335624	1.47415	Y	0.0463484	0.0372991	Y	4	2.63326	0.0491856	0.0267695	0.0356682	0.414249	0.0242817	0.219289	0.487417	0.703486	0.702907
256985211	Q9CQL1	Protein mago nashi homolog 2	Magohb	-0.412713	0.75121	-3.05908	-2.66443	0.0376925	0.0339115	1.46965	Y	0.0473134	0.037565	Y	4	2.63326	0.0491856	0.0273027	0.0359898	0.293298	0.301886	0.295109	0.444408	0.798551	0.885472
160333837	Q6ZWZ4	60S ribosomal protein L36	Rpl36	-0.416523	0.749228	-3.69322	-2.89593	0.0209595	0.0245394	1.61014	Y	0.0432996	0.0340827	Y	4	2.63326	0.0491856	0.0190792	0.0310308	0.185435	-0.110204	0.0955373	0.342965	0.489488	0.587885
112181167	Q8R5L1	Complement component 1 Q subcomponent-binding protein, mitochondrial (Complement component 1, q subcomponent binding protein) (Complement component 1, q subcomponent binding protein, isoform CRA_b) (p32-RACK)	C1qbp	-0.41779	0.74857	-0.858101	-1.05791	0.439212	0.327095	0.485326	N	0.16801	0.137059	N	4	2.63326	0.0491856	0.355575	0.233945	-0.337935	0.0652983	-0.783665	-0.775559	0.492628	0.48
268837785	Q3UJB0	Splicing factor 3b, subunit 2	Sf3b2	-0.417818	0.748556	-9.72146	-3.5148	0.000626894	0.0106907	1.97099	Y	0.042108	0.0273085	Y	4	2.63326	0.0491856	0.00277078	0.0211965	-0.248139	-0.381735	-0.26254	0.111059	0.134978	0.115003
8394460	Q9JHJ0	Tropomodulin-3 (Ubiquitous tropomodulin) (U-Tmod)	Tmod3	-0.418266	0.748323	-3.26923	-2.76472	0.0308114	0.0294557	1.53083	Y	0.0447269	0.0346475	Y	4	2.63326	0.0491856	0.024553	0.0343316	-0.0825192	-0.475803	-0.339944	0.151724	0.194032	0.0107761
6755372	P62908	40S ribosomal protein S3 (EC 4.2.99.18)	Rps3	-0.418983	0.747952	-4.2507	-3.0496	0.0131507	0.0198675	1.70186	Y	0.0432996	0.0318759	Y	4	2.63326	0.0491856	0.0145734	0.0283137	0.886643	0.623578	0.803781	1.08189	1.29185	1.19721
13386120	Q9CRB2	H/ACA ribonucleoprotein complex subunit 2 (Nucleolar protein family A member 2) (snoRNP protein NHP2)	Nhp2	-0.420201	0.74732	-3.88921	-2.9671	0.0177025	0.0222447	1.65277	Y	0.0432996	0.0335256	Y	4	2.63326	0.0491856	0.0175099	0.0300845	-1.04482	-1.37059	-1.33428	-0.789351	-0.805968	-0.893767
171543883	P10493	Nidogen-1 (NID-1) (Entactin)	Nid1	-0.4223	0.746234	-2.33969	-2.33667	0.0794053	0.0540822	1.26695	N	0.0654788	0.0469659	Y	4	2.63326	0.0491856	0.0488672	0.0489936	0.351489	-0.114181	-0.198058	0.456387	0.523654	0.32611
161760627	P15116	Cadherin-2 (Neural cadherin) (N-cadherin) (CD antigen CD325)	Cdh2	-0.423141	0.745799	-3.45375	-2.84838	0.0259654	0.0262122	1.5815	Y	0.0435604	0.0343762	Y	4	2.63326	0.0491856	0.0225154	0.0331029	0.486337	0.323245	0.0923839	0.642525	0.794342	0.734523
6679501	P62192	26S proteasome regulatory subunit 4 (P26s4) (26S proteasome AAA-ATPase subunit RPT2) (Proteasome 26S subunit ATPase 1)	Psmc1	-0.425107	0.744784	-2.52317	-2.44888	0.0651363	0.0460521	1.33675	Y	0.0593987	0.0435448	Y	4	2.63326	0.0491856	0.0425788	0.0452016	-1.53795	-1.95239	-1.80115	-1.52426	-1.36987	-1.12204
568970047	Q62261	Spectrin beta chain, non-erythrocytic 1	Sptbn1	-0.425619	0.744519	-3.49945	-2.87362	0.0249086	0.0253097	1.59671	Y	0.0435604	0.0340827	Y	4	2.63326	0.0491856	0.0221889	0.032906	0.017792	-0.237424	-0.314878	0.124789	0.361628	0.255931
122937372	Q9R0U0	Serine/arginine-rich splicing factor 10 (FUS-interacting serine-arginine-rich protein 1) (Neural-salient serine/arginine-rich protein) (Neural-specific SR protein) (Splicing factor, arginine/serine-rich 13A) (TLS-associated protein with Ser-Arg repeats) (TASR) (TLS-associated protein with SR repeats) (TLS-associated serine-arginine protein) (TLS-associated SR protein)	Srsf10	-0.425689	0.744483	-1.49293	-1.70899	0.209746	0.133568	0.874299	N	0.101552	0.075004	N	4	2.63326	0.0491856	0.121955	0.093067	0.52551	0.480248	0.712495	0.584627	1.52208	0.888613
171460910	Q6NV83	U2 snRNP-associated SURP motif-containing protein (140 kDa Ser/Arg-rich domain protein) (U2-associated protein SR140)	U2surp	-0.428346	0.743113	-1.76935	-1.94785	0.151554	0.0947494	1.02342	N	0.0865115	0.0618873	N	4	2.63326	0.0491856	0.0879129	0.072539	-0.422781	-1.1653	-1.05556	-0.588167	-0.346938	-0.423498
1039736956	UPI0003D75DBC	voltage-dependent anion-selective channel protein 1 isoform X1	Vdac1	-0.429396	0.742573	-2.00264	-2.12738	0.115767	0.0731112	1.13602	N	0.0776377	0.0543789	N	4	2.63326	0.0491856	0.0689607	0.0611105	-0.0286866	0.112422	-0.202273	0.00164995	0.58961	0.57839
568942582	UPI0003D77B9D	MICOS complex subunit Mic19 isoform X1	Chchd3	-0.429672	0.742431	-2.29306	-2.32375	0.0835749	0.0550953	1.25889	N	0.0674403	0.047422	Y	4	2.63326	0.0491856	0.0526665	0.0512847	0.828852	0.496932	0.499103	0.819517	1.32901	0.965376
21312970	Q9D0D3	Poly(A) RNA polymerase, mitochondrial (PAP) (EC 2.7.7.19) (PAP-associated domain-containing protein 1) (Polynucleotide adenylyltransferase)	Mtpap	-0.429838	0.742345	-6.60481	-3.44465	0.00272327	0.0117146	1.93127	Y	0.0432996	0.0273793	Y	4	2.63326	0.0491856	0.00635302	0.0233566	-0.082485	-0.168692	-0.0901594	0.234848	0.282616	0.430714
74315957	Q3UHZ5	Leiomodin-2 (Cardiac leiomodin) (C-LMOD) (Leiomodin)	Lmod2	-0.431942	0.741263	-2.13553	-2.22499	0.0995865	0.0635087	1.19717	N	0.0727404	0.0502187	N	4	2.63326	0.0491856	0.0613662	0.0565308	-0.319235	-1.00838	-0.700767	-0.220917	-0.199778	-0.311862
569003637	UPI0003D7244E	FH1/FH2 domain-containing protein 3 isoform X1	Fhod3	-0.432197	0.741132	-2.75783	-2.59087	0.0509631	0.0376267	1.4245	Y	0.0541287	0.0392824	Y	4	2.63326	0.0491856	0.0368401	0.041741	-0.258851	-0.594981	-0.719913	-0.194117	0.0536476	-0.136684
254553392	Q69Z99	Zinc finger protein 512	Znf512	-0.432338	0.74106	-2.5485	-2.48079	0.0634065	0.0440013	1.35653	Y	0.0590372	0.0427876	Y	4	2.63326	0.0491856	0.0431689	0.0455574	-0.603561	-0.625709	-0.748514	-0.540794	-0.149702	0.00972676
40254577	Q6ZWZ6	40S ribosomal protein S12	Rps12	-0.43385	0.740284	-4.55793	-3.1914	0.0103551	0.0163948	1.78529	Y	0.0432996	0.0296921	Y	4	2.63326	0.0491856	0.0135905	0.027721	1.55011	1.24055	1.4379	1.78428	1.87174	1.87409
31981605	Q9CZ19	Myosin light chain 4 (Myosin, light polypeptide 4)	Myl4	-0.434038	0.740187	-0.751423	-0.937788	0.494192	0.381232	0.418811	N	0.183049	0.152801	N	4	2.63326	0.0491856	0.50047	0.32132	0.0593458	-1.4059	-0.801152	-0.815766	0.480027	-0.509852
124248560	O70548	Telethonin (Titin cap protein)	Tcap	-0.434655	0.73987	-2.29857	-2.3374	0.0830697	0.0540258	1.2674	N	0.0672721	0.0469659	Y	4	2.63326	0.0491856	0.0536372	0.05187	0.957866	0.424385	0.379159	0.953296	1.04323	1.06885
568970300	UPI0003D787B4	smoothelin isoform X3	Smtn	-0.434786	0.739803	-4.38509	-3.15882	0.0118279	0.0171306	1.76623	Y	0.0432996	0.0299166	Y	4	2.63326	0.0491856	0.0147464	0.028418	-0.760706	-0.945584	-1.01477	-0.519921	-0.345751	-0.551029
33859604	Q8BVQ9	26S proteasome regulatory subunit 7	Psmc2	-0.4356	0.739386	-0.967929	-1.18491	0.387892	0.276763	0.557891	N	0.15322	0.121757	N	4	2.63326	0.0491856	0.303795	0.20272	-2.15221	-3.03918	-2.72251	-2.87359	-2.12684	-1.60667
7305363	P63005	Platelet-activating factor acetylhydrolase IB subunit alpha (Lissencephaly-1 protein) (LIS-1) (PAF acetylhydrolase 45 kDa subunit) (PAF-AH 45 kDa subunit) (PAF-AH alpha) (PAFAH alpha)	Pafah1b1	-0.439556	0.737362	-2.14997	-2.24829	0.0979854	0.061412	1.21175	N	0.0725351	0.0498122	Y	4	2.63326	0.0491856	0.0626984	0.0573341	0.802773	0.139533	0.31793	0.941907	0.868725	0.768272
72384374	Q9JIK5	Nucleolar RNA helicase 2 (EC 3.6.4.13) (DEAD box protein 21) (Gu-alpha) (Nucleolar RNA helicase Gu) (Nucleolar RNA helicase II) (RH II/Gu)	Ddx21	-0.440974	0.736637	-3.18298	-2.81205	0.0334397	0.0275717	1.55954	Y	0.0455507	0.0343866	Y	4	2.63326	0.0491856	0.0287905	0.0368869	0.15846	-0.210627	0.116819	0.354358	0.60573	0.427487
7106387	Q9Z2U1	Proteasome subunit alpha type-5 (EC 3.4.25.1) (Macropain zeta chain) (Multicatalytic endopeptidase complex zeta chain) (Proteasome zeta chain)	Psma5	-0.44163	0.736302	-1.84998	-2.02885	0.137993	0.0842909	1.07422	N	0.082905	0.0581153	N	4	2.63326	0.0491856	0.0854822	0.0710732	0.0700899	-0.602117	-0.487827	-0.132364	0.241427	0.195972
13385728	C0HKD8	Microfibrillar-associated protein 1A	Mfap1a	-0.443258	0.735472	-3.35059	-2.88715	0.0285532	0.0248395	1.60486	Y	0.0445952	0.0340827	Y	4	2.63326	0.0491856	0.0262519	0.0353561	-0.591013	-0.69425	-0.694522	-0.423179	-0.243638	0.0168048
568936299	E9PV66	Myosin XVIIIb	Myo18b	-0.443268	0.735467	-2.75586	-2.62027	0.0510662	0.0360931	1.44258	Y	0.0541287	0.0386794	Y	4	2.63326	0.0491856	0.0388069	0.0429271	-0.612486	-1.09179	-0.856954	-0.481347	-0.246954	-0.503126
61676215	Q3U0S6	Ras-interacting protein 1 (Rain)	Rasip1	-0.44514	0.734513	-1.77948	-1.97593	0.149775	0.0909856	1.04103	N	0.0863288	0.0607086	N	4	2.63326	0.0491856	0.0938641	0.0761277	-0.901005	-0.788806	-1.0595	-0.941867	-0.292167	-0.179856
30519943	Q8BGH2	Sorting and assembly machinery component 50 homolog	Samm50	-0.446963	0.733585	-3.27089	-2.86861	0.0307635	0.0254861	1.5937	Y	0.0447269	0.0340827	Y	4	2.63326	0.0491856	0.0280094	0.0364159	0.292862	0.151727	0.015667	0.518653	0.819565	0.462927
13507646	Q9JK92	Heat shock protein beta-8 (HspB8) (Alpha-crystallin C chain) (Small stress protein-like protein HSP22)	Hspb8	-0.44786	0.73313	-2.66709	-2.58483	0.0559755	0.0379505	1.42078	Y	0.0556335	0.0392824	Y	4	2.63326	0.0491856	0.0422962	0.0450312	0.665898	0.27888	0.118586	0.795189	0.879247	0.732508
158631194	Q9D868	Peptidyl-prolyl cis-trans isomerase H (PPIase H) (EC 5.2.1.8) (Rotamase H)	Ppih	-0.452273	0.73089	-2.11319	-2.24351	0.102122	0.0618364	1.20876	N	0.073955	0.0499199	Y	4	2.63326	0.0491856	0.0687092	0.0609587	-1.51863	-1.93652	-1.95821	-1.56605	-1.44951	-1.04098
568945148	Q9CZX8	40S ribosomal protein S19	Rps19	-0.452959	0.730543	-6.79483	-3.61537	0.00245014	0.00938899	2.02738	Y	0.0432996	0.0262277	Y	4	2.63326	0.0491856	0.0066658	0.0235453	0.4913	0.329044	0.429451	0.788446	0.951243	0.868984
153791270	F8VQJ3	Laminin subunit gamma-1	Lamc1	-0.453196	0.730423	-3.00954	-2.77396	0.0395681	0.0290772	1.53645	Y	0.0484126	0.0345552	Y	4	2.63326	0.0491856	0.0340143	0.040037	0.57881	0.220169	0.151624	0.633822	0.876556	0.799813
6678143	P32067	Lupus La protein homolog (La autoantigen homolog) (La ribonucleoprotein)	Ssb	-0.453288	0.730376	-1.95381	-2.12564	0.12242	0.0732954	1.13492	N	0.0797891	0.0543789	N	4	2.63326	0.0491856	0.0807373	0.068212	-0.92638	-0.972822	-0.867242	-0.893381	-0.103267	-0.409931
225543273	A2AJI0	MAP7 domain-containing protein 1	Map7d1	-0.45458	0.729723	-3.484	-2.97914	0.02526	0.0218795	1.65996	Y	0.0435604	0.0334338	Y	4	2.63326	0.0491856	0.0255362	0.0349245	-1.90536	-1.85159	-1.76257	-1.49384	-1.13854	-1.5234
568969765	Q8CC13	AP complex subunit beta	Ap1b1	-0.455221	0.729398	-3.25307	-2.88917	0.0312848	0.0247701	1.60607	Y	0.0449278	0.0340827	Y	4	2.63326	0.0491856	0.0293731	0.0372382	-0.0629404	-0.157289	-0.103422	0.0743002	0.508224	0.459488
19527358	Q99KP6	Pre-mRNA-processing factor 19 (EC 2.3.2.27) (Nuclear matrix protein 200) (PRP19/PSO4 homolog) (RING-type E3 ubiquitin transferase PRP19) (Senescence evasion factor)	Prpf19	-0.455909	0.729051	-5.29849	-3.44815	0.00609338	0.011661	1.93326	Y	0.0432996	0.0273793	Y	4	2.63326	0.0491856	0.0111056	0.0262226	-0.435741	-0.454956	-0.372638	-0.0211605	0.196971	-0.0714183
21313308	Q9D0E1	Heterogeneous nuclear ribonucleoprotein M (hnRNP M)	Hnrnpm	-0.456047	0.728981	-4.68868	-3.33298	0.00938698	0.0135707	1.8674	Y	0.0432996	0.0282565	Y	4	2.63326	0.0491856	0.0141909	0.0280831	0.0271399	-0.158824	0.000515159	0.260918	0.520823	0.455231
40254124	Q91ZW3	SWI/SNF-related matrix-associated actin-dependent regulator of chromatin subfamily A member 5 (EC 3.6.4.-) (Sucrose nonfermenting protein 2 homolog) (mSnf2h)	Smarca5	-0.45647	0.728767	-3.43681	-2.96793	0.0263707	0.0222194	1.65327	Y	0.0435604	0.0335256	Y	4	2.63326	0.0491856	0.026461	0.0354822	-0.274636	-0.526125	-0.38905	-0.0237253	-0.0767381	0.280063
1039753689	UPI0007ECA748	vesicle-associated membrane protein-associated protein A isoform X1	Vapa	-0.45671	0.728646	-3.32059	-2.92233	0.0293622	0.0236602	1.62598	Y	0.0447269	0.0340827	Y	4	2.63326	0.0491856	0.0283753	0.0366365	0.515932	0.230136	0.12567	0.610791	0.771259	0.859817
113195686	P21619	Lamin-B2	Lmnb2	-0.458894	0.727544	-3.80612	-3.10924	0.0190033	0.0183191	1.7371	Y	0.0432996	0.0306599	Y	4	2.63326	0.0491856	0.0218047	0.0326744	-0.195227	-0.585607	-0.414244	0.0615517	0.132967	-0.012914
161086971	P47753	F-actin-capping protein subunit alpha-1 (CapZ alpha-1)	Capza1	-0.462518	0.725719	-4.1832	-3.23916	0.0138824	0.0153771	1.81313	Y	0.0432996	0.0289057	Y	4	2.63326	0.0491856	0.0183371	0.0305833	0.552885	0.334959	0.278701	0.71324	0.95775	0.883108
34328219	Q9R0M4	Podocalyxin (Podocalyxin-like protein 1) (PC) (PCLP-1)	Podxl	-0.464185	0.72488	-2.29749	-2.39282	0.083168	0.0498975	1.30192	Y	0.0672721	0.0453838	Y	4	2.63326	0.0491856	0.06123	0.0564487	-1.3299	-1.06205	-1.08893	-1.06197	-0.495471	-0.530884
165932270	Q8K4Z5	Splicing factor 3A subunit 1 (SF3a120)	Sf3a1	-0.465992	0.723973	-3.82902	-3.14541	0.0186337	0.0174437	1.75836	Y	0.0432996	0.0301556	Y	4	2.63326	0.0491856	0.0222163	0.0329226	-0.48317	-0.824754	-0.660813	-0.331263	-0.101462	-0.138037
114052541	Q62189	U1 small nuclear ribonucleoprotein A (U1 snRNP A) (U1-A) (U1A)	Snrpa	-0.466295	0.723821	-2.67573	-2.63437	0.0554742	0.0353808	1.45123	Y	0.0555718	0.0384461	Y	4	2.63326	0.0491856	0.0455541	0.0469957	-1.31216	-1.59447	-1.46175	-1.23183	-0.703795	-1.03387
1039745676	UPI0007ED31BC	kinectin isoform X17	Ktn1	-0.466509	0.723714	-4.93133	-3.43787	0.00786536	0.0118191	1.92741	Y	0.0432996	0.0273793	Y	4	2.63326	0.0491856	0.013424	0.0276206	-0.0728466	-0.367482	-0.132209	0.236078	0.33276	0.258151
568980259	UPI0000606A3C	RNA-binding protein 25 isoform X1	Rbm25	-0.466852	0.723542	-3.92411	-3.18005	0.017188	0.0166472	1.77866	Y	0.0432996	0.0298669	Y	4	2.63326	0.0491856	0.0212308	0.0323282	-0.202807	-0.597239	-0.433735	0.0844818	-0.00947547	0.0917673
22095003	Q9D554	Splicing factor 3A subunit 3 (SF3a60) (Spliceosome-associated protein 61) (SAP 61)	Sf3a3	-0.467423	0.723255	-3.75005	-3.12409	0.0199462	0.0179541	1.74584	Y	0.0432996	0.0305747	Y	4	2.63326	0.0491856	0.0233044	0.0335787	-0.13324	-0.372957	-0.10321	0.167339	0.44582	0.179703
27369533	Q8BJ71	Nuclear pore complex protein Nup93 (93 kDa nucleoporin) (CBP-interacting protein 4) (Nucleoporin Nup93)	Nup93	-0.468017	0.722958	-3.23191	-2.92153	0.0319177	0.0236861	1.62551	Y	0.0450727	0.0340827	Y	4	2.63326	0.0491856	0.0314554	0.0384939	-2.36066	-2.66776	-2.49839	-2.23261	-2.0532	-1.83695
755498922	UPI0003D79105	1-phosphatidylinositol 4,5-bisphosphate phosphodiesterase beta-4 isoform X1	Plcb4	-0.472661	0.720634	-1.97892	-2.17058	0.118948	0.0686921	1.16309	N	0.0781748	0.0529565	N	4	2.63326	0.0491856	0.0855722	0.0711276	0.457478	-0.130717	-0.307276	0.591105	0.385598	0.460764
568933219	Q99LE6	ATP-binding cassette sub-family F member 2	Abcf2	-0.472776	0.720577	-3.1544	-2.90079	0.0343684	0.024375	1.61306	Y	0.0455507	0.0340827	Y	4	2.63326	0.0491856	0.0336953	0.0398446	-0.427855	-0.564736	-0.492126	-0.297712	0.0398893	0.191434
270132817	Q99JR5	Tubulointerstitial nephritis antigen-like (Adrenocortical zonation factor 1) (AZ-1) (Androgen-regulated gene 1 protein) (Tubulointerstitial nephritis antigen-related protein) (TARP)	Tinagl1	-0.474898	0.719518	-1.90295	-2.11174	0.129797	0.0747814	1.12621	N	0.081163	0.0545655	N	4	2.63326	0.0491856	0.0934195	0.0758596	-0.0277737	-0.648786	-0.639527	-0.239975	0.228785	0.119796
1039754272	UPI0007EDFD73	Na(+)/H(+) exchange regulatory cofactor NHE-RF2 isoform X1	Slc9a3r2	-0.476927	0.718506	-2.59752	-2.61173	0.0602053	0.0365318	1.43733	Y	0.0574777	0.0387136	Y	4	2.63326	0.0491856	0.0505683	0.0500194	-0.26035	-0.23703	-0.244675	-0.10906	0.521326	0.27646
270309140	F6ZDS4	Nucleoprotein TPR (NPC-associated intranuclear protein) (Translocated promoter region and nuclear basket protein)	Tpr	-0.477818	0.718063	-2.51036	-2.55903	0.066032	0.0393651	1.40489	Y	0.0599983	0.0403423	Y	4	2.63326	0.0491856	0.054343	0.0522957	-1.34827	-1.50335	-1.46444	-1.32141	-0.849037	-0.71216
117938334	Q3TTX2	Uncharacterized protein (Fragment)	Sptbn1	-0.477922	0.718011	-2.31333	-2.42769	0.0817328	0.0474679	1.3236	Y	0.0664283	0.044393	Y	4	2.63326	0.0491856	0.0640221	0.0581323	0.0304585	-0.107347	-0.0764226	0.675385	0.579079	0.0259906
226958463	E9Q1U2	Synaptopodin-2	Synpo2	-0.478529	0.717709	-2.67381	-2.66129	0.0555854	0.0340616	1.46773	Y	0.0555718	0.0376096	Y	4	2.63326	0.0491856	0.048045	0.0484978	-0.0163013	-0.479218	-0.473761	0.047828	0.338881	0.0795981
1039746171	Q9JKS4	Lim domain-binding protein 3	Ldb3	-0.483973	0.715006	-3.6863	-3.16306	0.021087	0.0170327	1.76872	Y	0.0432996	0.0298981	Y	4	2.63326	0.0491856	0.0258554	0.035117	0.85195	0.560403	0.463348	1.02831	1.22645	1.07286
157277950	P26043	Radixin (ESP10)	Rdx	-0.487636	0.713193	-2.25763	-2.40386	0.0869082	0.0491147	1.30879	Y	0.0683402	0.0451922	Y	4	2.63326	0.0491856	0.0699807	0.0617255	0.403525	0.189224	0.192916	0.343529	0.988411	0.916634
568954577	Q9R0L6	Pericentriolar material 1 protein (PCM-1) (mPCM-1)	Pcm1	-0.490892	0.711585	-2.80951	-2.76909	0.0483413	0.0292763	1.53348	Y	0.0532009	0.0345552	Y	4	2.63326	0.0491856	0.0457934	0.04714	-0.873033	-1.46561	-1.18908	-0.665489	-0.75295	-0.636609
755562975	UPI0005ABA775	sorbin and SH3 domain-containing protein 1 isoform X40	Sorbs1	-0.494809	0.709656	-3.80352	-3.247	0.0190459	0.0152166	1.81768	Y	0.0432996	0.0289057	Y	4	2.63326	0.0491856	0.025386	0.0348339	-0.94737	-1.19189	-1.38611	-0.62921	-0.683977	-0.727757
345842337	E9QQ96	Obscurin	Obscn	-0.495717	0.709209	-2.99193	-2.88271	0.0402613	0.0249927	1.60219	Y	0.0485152	0.0340827	Y	4	2.63326	0.0491856	0.0411772	0.0443564	0.483844	0.133957	-0.0842651	0.690788	0.665338	0.664561
568940125	UPI0003D70629	chromodomain-helicase-DNA-binding protein 4 isoform X1	Chd4	-0.495742	0.709197	-3.43117	-3.09807	0.0265072	0.018599	1.73051	Y	0.0435604	0.0309041	Y	4	2.63326	0.0491856	0.0313125	0.0384077	-1.31315	-1.50683	-1.43989	-1.17141	-0.716238	-0.884997
1039760901	UPI0003D74574	ATP-dependent zinc metalloprotease YME1L1 isoform X1	Yme1l1	-0.496872	0.708642	-2.95014	-2.86285	0.0419636	0.0256909	1.59022	Y	0.0492384	0.0340827	Y	4	2.63326	0.0491856	0.0425496	0.045184	0.269292	0.184419	0.264664	0.423423	0.795889	0.989679
1039737528	UPI0007ED463B	unconventional myosin-XVIIIa isoform X15	Myo18a	-0.497341	0.708411	-3.58127	-3.16792	0.0231414	0.0169215	1.77156	Y	0.0433315	0.0298669	Y	4	2.63326	0.0491856	0.0289285	0.0369701	0.26602	0.0248907	-0.0225673	0.408865	0.574915	0.776587
22165382	Q6PJ87	Casein kinase 1, alpha 1 (Casein kinase 1, alpha 1, isoform CRA_a)	Csnk1a1	-0.497344	0.70841	-3.91276	-3.29665	0.0173534	0.0142415	1.84645	Y	0.0432996	0.0285171	Y	4	2.63326	0.0491856	0.0242347	0.0341397	0.662016	0.378311	0.504693	0.841901	1.01709	1.17806
568939395	P49817	Caveolin-1	Cav1	-0.497433	0.708366	-1.54237	-1.80747	0.197849	0.115983	0.935607	N	0.0985571	0.0689233	N	4	2.63326	0.0491856	0.156022	0.11361	0.788024	0.683854	0.508999	0.534116	1.44723	1.49183
254675115	Q9QXS1	Plectin (PCN) (PLTN) (Plectin-1) (Plectin-6)	Plec	-0.497756	0.708208	-5.29413	-3.67473	0.00611138	0.00870257	2.06035	Y	0.0432996	0.0257304	Y	4	2.63326	0.0491856	0.0132597	0.0275215	0.217802	0.0897016	0.0615396	0.592885	0.772551	0.496874
13385044	Q6ZWV7	60S ribosomal protein L35	Rpl35	-0.501713	0.706268	-3.84422	-3.28765	0.0183931	0.014413	1.84124	Y	0.0432996	0.0285171	Y	4	2.63326	0.0491856	0.0255497	0.0349327	-0.940654	-1.15866	-1.07596	-0.781673	-0.476346	-0.412115
46049022	Q99JI4	26S proteasome non-ATPase regulatory subunit 6 (26S proteasome regulatory subunit RPN7) (26S proteasome regulatory subunit S10) (p42A)	Psmd6	-0.502665	0.705802	-2.32507	-2.47639	0.0806869	0.0442784	1.35381	Y	0.0659588	0.0428138	Y	4	2.63326	0.0491856	0.0701094	0.0618031	-0.594518	-0.943839	-0.720961	-0.630764	-0.0389834	-0.0815764
1039792183	Q8VDC1	FYVE and coiled-coil domain-containing protein 1	Fyco1	-0.50329	0.705496	-2.12221	-2.32318	0.10109	0.0551402	1.25853	N	0.0736799	0.047422	Y	4	2.63326	0.0491856	0.0843627	0.0703982	-0.0139497	-0.10756	-0.472203	-0.0291694	0.634402	0.310924
568941437	UPI0000F22350	von Willebrand factor isoform X1	Vwf	-0.504171	0.705066	-1.31537	-1.58165	0.258718	0.160097	0.795616	N	0.116756	0.0839201	N	4	2.63326	0.0491856	0.22037	0.152413	-1.3542	-1.87839	-1.37443	-1.50138	-0.364178	-1.22895
1039775878	Q9D9G7	1700074P13Rik protein (RIKEN cDNA 1700074P13 gene) (RIKEN cDNA 1700074P13, isoform CRA_a)	1700074P13Rik	-0.513122	0.700705	-1.04912	-1.2939	0.353325	0.238926	0.621736	N	0.143199	0.110219	N	4	2.63326	0.0491856	0.358821	0.235902	0.740053	1.12736	0.88893	0.499668	1.73166	2.06438
34368584	Q3TIV5	Zinc finger CCCH domain-containing protein 15 (DRG family-regulatory protein 1) (Epo-immediate response gene protein FM22)	Zc3h15	-0.514291	0.700137	-4.41157	-3.53113	0.0115865	0.0104666	1.98019	Y	0.0432996	0.0273085	Y	4	2.63326	0.0491856	0.0203856	0.0318186	-0.700505	-0.862695	-0.725003	-0.457908	-0.128861	-0.158562
407027856	P47757	F-actin-capping protein subunit beta (CapZ beta)	Capzb	-0.514346	0.70011	-5.63465	-3.82927	0.00488183	0.00715966	2.14511	Y	0.0432996	0.0256173	Y	4	2.63326	0.0491856	0.0124988	0.0270627	0.228864	0.0888714	0.0949104	0.493892	0.734214	0.727578
112420990	O35691	Pinin	Pnn	-0.515437	0.699581	-2.43102	-2.57314	0.0719018	0.0385844	1.41359	Y	0.0623241	0.0396609	Y	4	2.63326	0.0491856	0.0674318	0.0601885	-2.11114	-2.76569	-2.50208	-2.0688	-1.76041	-2.00339
755539474	UPI0005ABA4BE	transcription elongation factor, mitochondrial isoform X1	Tefm	-0.516552	0.699041	-2.32198	-2.4951	0.0809604	0.0431128	1.36539	Y	0.0659588	0.0424055	Y	4	2.63326	0.0491856	0.0742337	0.0642902	-0.448325	-0.72018	-0.723279	-0.33132	0.291482	-0.30229
19527156	Q6ZWM4	U6 snRNA-associated Sm-like protein LSm8	Lsm8	-0.519253	0.697733	-3.73889	-3.30743	0.0201404	0.0140387	1.85267	Y	0.0432996	0.0285171	Y	4	2.63326	0.0491856	0.028931	0.0369717	-1.99332	-1.98274	-1.87004	-1.65204	-1.19153	-1.44477
262231769	Q9WV02	RNA-binding motif protein, X chromosome (Heterogeneous nuclear ribonucleoprotein G) (hnRNP G) [Cleaved into: RNA-binding motif protein, X chromosome, N-terminally processed]	Rbmx	-0.519312	0.697704	-5.49694	-3.82851	0.00533884	0.00716643	2.1447	Y	0.0432996	0.0256173	Y	4	2.63326	0.0491856	0.0133877	0.0275987	0.234373	-0.0329204	0.153961	0.695118	0.683305	0.534928
162461907	P38647	Stress-70 protein, mitochondrial (75 kDa glucose-regulated protein) (GRP-75) (Heat shock 70 kDa protein 9) (Mortalin) (Peptide-binding protein 74) (PBP74) (p66 MOT)	Hspa9	-0.520424	0.697167	-1.8486	-2.11042	0.138214	0.0749236	1.12538	N	0.082905	0.0545655	N	4	2.63326	0.0491856	0.118883	0.0912149	0.317686	0.244695	0.0441865	0.183841	0.989765	0.994232
88014720	P70168	Importin subunit beta-1 (Karyopherin subunit beta-1) (Nuclear factor p97) (Pore targeting complex 97 kDa subunit) (PTAC97) (SCG)	Kpnb1	-0.523487	0.695688	-3.2853	-3.11028	0.0303492	0.0182934	1.73771	Y	0.0447269	0.0306599	Y	4	2.63326	0.0491856	0.0380849	0.0424916	-1.43369	-1.93353	-1.84885	-1.18958	-1.29217	-1.16386
10048462	Q9Z2Z6	Mitochondrial carnitine/acylcarnitine carrier protein (Carnitine/acylcarnitine translocase) (CAC) (mCAC) (Solute carrier family 25 member 20)	Slc25a20	-0.525319	0.694805	-1.88851	-2.15041	0.131978	0.0707214	1.15045	N	0.0817724	0.053556	N	4	2.63326	0.0491856	0.116065	0.0895152	0.572578	0.328137	-0.0237073	0.433482	0.832013	1.18747
345842335	H7BX05	Obscurin	Obscn	-0.528871	0.693097	-7.16472	-4.14208	0.00200889	0.00487697	2.31185	Y	0.0432996	0.0256173	Y	4	2.63326	0.0491856	0.0081732	0.0244542	-0.696729	-0.853803	-0.873302	-0.333703	-0.182938	-0.320581
124494242	Q9WTI7	Unconventional myosin-Ic (Myosin I beta) (MMI-beta) (MMIb)	Myo1c	-0.535633	0.689856	-2.6985	-2.7931	0.0541787	0.0283103	1.54806	Y	0.0549762	0.0344853	Y	4	2.63326	0.0491856	0.0590994	0.0551638	0.172072	-0.362689	-0.341365	0.185018	0.508224	0.381676
1039759925	UPI0007ED5CDC	titin isoform X1	Ttn	-0.536689	0.689351	-3.99242	-3.47053	0.0162322	0.0113249	1.94596	Y	0.0432996	0.0273793	Y	4	2.63326	0.0491856	0.0271059	0.0358711	0.493793	0.236395	0.0902778	0.826584	0.912753	0.691196
13386034	P62301	40S ribosomal protein S13	Rps13	-0.54441	0.685672	-5.1291	-3.8679	0.00684279	0.00682255	2.16605	Y	0.0432996	0.0256173	Y	4	2.63326	0.0491856	0.016899	0.0297161	0.653485	0.521897	0.694127	1.19023	0.997169	1.31534
74315975	Q3TXS7	26S proteasome non-ATPase regulatory subunit 1 (26S proteasome regulatory subunit RPN2) (26S proteasome regulatory subunit S1)	Psmd1	-0.545756	0.685032	-1.83603	-2.11957	0.140243	0.0739405	1.13112	N	0.083534	0.0543789	N	4	2.63326	0.0491856	0.132535	0.099447	-0.775846	-1.71313	-1.33341	-0.966419	-0.626935	-0.591765
157952206	Q60739	BAG family molecular chaperone regulator 1 (BAG-1) (Bcl-2-associated athanogene 1)	Bag1	-0.54785	0.684039	-1.41852	-1.70734	0.229031	0.133885	0.87327	N	0.10766	0.075004	N	4	2.63326	0.0491856	0.22374	0.154446	0.0601612	-0.158827	0.0954319	-0.205402	0.858188	0.987529
21312994	Q9CR62	Mitochondrial 2-oxoglutarate/malate carrier protein (OGCP) (Solute carrier family 25 member 11)	Slc25a11	-0.549695	0.683165	-9.67731	-4.49382	0.000638016	0.00322322	2.49171	Y	0.042108	0.0256173	Y	4	2.63326	0.0491856	0.00483977	0.0224441	-0.460661	-0.472396	-0.599008	-0.0246312	0.0983486	0.043302
244790049	Q9R112	Sulfide:quinone oxidoreductase, mitochondrial (SQOR) (EC 1.8.5.-) (Sulfide quinone oxidoreductase)	Sqor	-0.549789	0.68312	-3.26609	-3.16871	0.0309028	0.0169035	1.77202	Y	0.0447269	0.0298669	Y	4	2.63326	0.0491856	0.0425037	0.0451563	0.257285	0.289531	0.21923	0.474453	1.01237	0.92859
568932668	UPI0003D757B2	A-kinase anchor protein 9 isoform X1	Akap9	-0.55022	0.682916	-3.28004	-3.17745	0.0304997	0.0167056	1.77714	Y	0.0447269	0.0298669	Y	4	2.63326	0.0491856	0.0422091	0.0449787	-0.744663	-1.10756	-0.822817	-0.561908	-0.124044	-0.338429
117647249	Q60675	Laminin subunit alpha-2 (Laminin M chain) (Laminin-12 subunit alpha) (Laminin-2 subunit alpha) (Laminin-4 subunit alpha) (Merosin heavy chain)	Lama2	-0.55191	0.682117	-3.58191	-3.33825	0.0231283	0.0134763	1.87043	Y	0.0433315	0.0282565	Y	4	2.63326	0.0491856	0.0356122	0.0410006	0.217304	-0.127576	-0.19613	0.48053	0.679871	0.388926
568944746	UPI0003D74A8C	2-oxoisovalerate dehydrogenase subunit alpha, mitochondrial isoform X1	Bckdha	-0.552671	0.681757	-0.798438	-1.00579	0.469336	0.349789	0.456194	N	0.175685	0.143439	N	4	2.63326	0.0491856	0.718692	0.452912	-0.786197	0.303509	-0.26254	-0.923164	0.81581	1.02014
256220343	Q99LB2	Dehydrogenase/reductase SDR family member 4 (EC 1.1.1.184) (NADPH-dependent carbonyl reductase/NADP-retinol dehydrogenase) (CR) (PHCR) (NADPH-dependent retinol dehydrogenase/reductase) (NDRD) (mouNRDR) (Peroxisomal short-chain alcohol dehydrogenase) (PSCD)	Dhrs4	-0.557039	0.679696	-2.75792	-2.87204	0.0509582	0.0253651	1.59576	Y	0.0541287	0.0340827	Y	4	2.63326	0.0491856	0.0611925	0.056426	0.204786	0.471401	0.381707	0.53739	1.08983	1.10179
568966888	Q9DBR7	Protein phosphatase 1 regulatory subunit 12A (Myosin phosphatase-targeting subunit 1) (Myosin phosphatase target subunit 1)	Ppp1r12a	-0.560143	0.678235	-3.11895	-3.1087	0.0355627	0.0183326	1.73678	Y	0.0461793	0.0306599	Y	4	2.63326	0.0491856	0.0483807	0.0487003	-1.62533	-1.81053	-2.07105	-1.2996	-1.04853	-1.47835
227430367	Q3UKJ7	WD40 repeat-containing protein SMU1 (Smu-1 suppressor of mec-8 and unc-52 protein homolog) [Cleaved into: WD40 repeat-containing protein SMU1, N-terminally processed]	Smu1	-0.56068	0.677983	-12.7659	-4.70839	0.000216964	0.00252615	2.59754	Y	0.0367664	0.0256173	Y	4	2.63326	0.0491856	0.00289348	0.0212705	-0.808439	-0.799437	-0.921361	-0.321406	-0.257466	-0.268325
6678059	Q61235	Beta-2-syntrophin (59 kDa dystrophin-associated protein A1 basic component 2) (Syntrophin-3) (SNT3) (Syntrophin-like) (SNTL)	Sntb2	-0.561912	0.677404	-3.6068	-3.37906	0.0226208	0.0127687	1.89385	Y	0.0432996	0.0279209	Y	4	2.63326	0.0491856	0.0364069	0.0414798	-0.643049	-0.769864	-0.713919	-0.424046	-0.114458	0.0974094
765365466	Q3UYQ4	Uncharacterized protein	Api5	-0.56473	0.676082	-2.52574	-2.71821	0.0649582	0.0314401	1.50252	Y	0.0593987	0.0358722	Y	4	2.63326	0.0491856	0.0749884	0.0647453	0.0869951	-0.17103	-0.13757	0.086098	0.607139	0.779348
31981810	P42125	Enoyl-CoA delta isomerase 1, mitochondrial (EC 5.3.3.8) (3,2-trans-enoyl-CoA isomerase) (Delta(3),Delta(2)-enoyl-CoA isomerase) (D3,D2-enoyl-CoA isomerase) (Dodecenoyl-CoA isomerase)	Eci1	-0.565743	0.675607	-1.22985	-1.50867	0.286142	0.177452	0.750918	N	0.125619	0.089062	N	4	2.63326	0.0491856	0.317413	0.210932	-0.12376	0.219643	0.257273	-0.172412	0.908057	1.31474
6755252	O35295	Transcriptional activator protein Pur-beta (Purine-rich element-binding protein B) (Vascular actin single-stranded DNA-binding factor 2 p44 component)	Purb	-0.566903	0.675065	-3.6858	-3.43215	0.0210963	0.011908	1.92416	Y	0.0432996	0.0273793	Y	4	2.63326	0.0491856	0.035485	0.0409239	-0.579119	-0.923393	-1.04759	-0.409978	-0.219542	-0.219874
46250738	Q8CCK0	Core histone macro-H2A.2 (Histone macroH2A2) (mH2A2)	H2afy2	-0.568201	0.674457	-4.86863	-3.89962	0.0082278	0.00655888	2.18317	Y	0.0432996	0.0256173	Y	4	2.63326	0.0491856	0.0204306	0.0318457	-0.539196	-0.604929	-0.551342	-0.147713	0.22873	-0.0718816
568978894	UPI0003D76072	MAP/microtubule affinity-regulating kinase 3 isoform X1	Mark3	-0.570237	0.673506	-3.42707	-3.30815	0.0266069	0.0140252	1.85309	Y	0.0435604	0.0285171	Y	4	2.63326	0.0491856	0.0415293	0.0445687	-2.31604	-2.37377	-2.40382	-2.00304	-1.90992	-1.46996
1039736497	UPI0003D720AB	nucleolar transcription factor 1 isoform X1;nucleolar transcription factor 1 isoform X2;nucleolar transcription factor 1 isoform X3;nucleolar transcription factor 1 isoform X4	Ubtf	-0.570434	0.673414	-3.39954	-3.29364	0.0272889	0.0142986	1.84471	Y	0.0435604	0.0285171	Y	4	2.63326	0.0491856	0.042234	0.0449936	0.514199	0.145119	0.277587	0.658911	1.1039	0.885397
569009599	UPI0003D77452	dystrophin isoform X1	Dmd	-0.570722	0.67328	-5.65914	-4.12418	0.00480563	0.00498325	2.30249	Y	0.0432996	0.0256173	Y	4	2.63326	0.0491856	0.015256	0.0287253	0.430451	0.239514	0.111188	0.773112	0.9068	0.813408
1039775421	UPI0007ED2A75	try10-like trypsinogen isoform X1	Gm5409	-0.573906	0.671796	-1.28406	-1.57086	0.268449	0.16256	0.788986	N	0.119715	0.0846923	N	4	2.63326	0.0491856	0.29964	0.200215	0.750973	0.968289	0.895245	0.569614	1.77473	1.99188
18087731	Q9D0M5	Dynein light chain 2, cytoplasmic (8 kDa dynein light chain b) (DLC8) (DLC8b) (Dynein light chain LC8-type 2)	Dynll2	-0.576677	0.670507	-4.67974	-3.87266	0.00944956	0.0067823	2.16862	Y	0.0432996	0.0256173	Y	4	2.63326	0.0491856	0.0227779	0.0332612	0.222853	-0.0164516	-0.182536	0.620612	0.621895	0.511388
133778931	G5E8J6	Histidine rich calcium binding protein, isoform CRA_a (Histidine-rich calcium-binding protein)	Hrc	-0.578723	0.669556	-1.00351	-1.25227	0.372398	0.252815	0.597197	N	0.14954	0.114357	N	4	2.63326	0.0491856	0.498875	0.320358	-4.25368	-2.88743	-3.36284	-3.69547	-2.79827	-2.27404
31560697	P10922	Histone H1.0 (Histone H1') (Histone H1(0)) (MyD196) [Cleaved into: Histone H1.0, N-terminally processed]	H1f0	-0.580168	0.668886	-3.14444	-3.16765	0.034699	0.0169277	1.7714	Y	0.0455507	0.0298669	Y	4	2.63326	0.0491856	0.0510635	0.0503181	0.841599	0.739997	0.812201	1.01426	1.57046	1.54958
568905921	UPI0003D71648	unconventional myosin-Ib isoform X1	Myo1b	-0.580502	0.668731	-4.16257	-3.69029	0.0141158	0.00853184	2.06896	Y	0.0432996	0.0256173	Y	4	2.63326	0.0491856	0.0291726	0.0371174	-0.248317	-0.470787	-0.574736	-0.0478399	0.210171	0.285334
227116273	Q9Z0Y1	Dynactin subunit 3 (Dynactin light chain p24)	Dctn3	-0.587667	0.665418	-3.39882	-3.33532	0.0273069	0.0135287	1.86874	Y	0.0435604	0.0282565	Y	4	2.63326	0.0491856	0.0448432	0.046567	-1.73198	-2.09192	-1.71499	-1.48028	-1.23452	-1.06109
31543940	Q8BH80	Vesicle-associated membrane protein, associated protein B and C (Vesicle-associated membrane protein-associated protein B)	Vapb	-0.588942	0.66483	-4.09848	-3.69035	0.0148716	0.00853122	2.06899	Y	0.0432996	0.0256173	Y	4	2.63326	0.0491856	0.0309736	0.0382034	0.799435	0.513929	0.32869	1.05127	1.16185	1.19576
568987488	UPI000154CE2B	vinculin, isoform CRA_b;vinculin isoform X1	Vcl	-0.589505	0.664571	-3.64305	-3.47327	0.0219055	0.0112845	1.94752	Y	0.0432996	0.0273793	Y	4	2.63326	0.0491856	0.0392767	0.0432103	0.564295	0.218063	0.0588209	0.744948	0.925005	0.93974
226958579	Q8CC88	von Willebrand factor A domain-containing protein 8	Vwa8	-0.597499	0.660899	-1.38746	-1.691	0.237596	0.137045	0.863138	N	0.110096	0.0761511	N	4	2.63326	0.0491856	0.278179	0.187273	0.263114	0.147305	0.18904	-0.0511538	1.10759	1.33552
7106389	Q9Z2U0	Proteasome subunit alpha type-7 (EC 3.4.25.1) (Proteasome subunit RC6-1)	Psma7	-0.598444	0.660466	-2.54935	-2.78282	0.0633489	0.0287196	1.54182	Y	0.0590372	0.0345552	Y	4	2.63326	0.0491856	0.0826569	0.0693695	-0.690128	-1.36164	-0.972	-0.67163	-0.286844	-0.269961
568909313	UPI0003D789FF	protein phosphatase 1 regulatory subunit 12B isoform X1	Ppp1r12b	-0.60287	0.658443	-4.07752	-3.72459	0.0151292	0.00816824	2.08787	Y	0.0432996	0.0256173	Y	4	2.63326	0.0491856	0.0327903	0.0392989	-0.46708	-0.632361	-0.832774	-0.230803	0.124896	-0.0176991
6678303	P40630	Transcription factor A, mitochondrial (mtTFA) (Testis-specific high mobility group protein) (TS-HMG)	Tfam	-0.602916	0.658422	-2.23871	-2.5308	0.0887485	0.0409761	1.38747	Y	0.0694651	0.0415824	Y	4	2.63326	0.0491856	0.108795	0.0851313	0.897931	1.06177	0.95454	1.09798	2.01371	1.6113
51010909	Q9QUK9	MCG15083 (TESP4) (Trypsin 5) (Trypsinogen 9)	Try5	-0.610249	0.655083	-1.25289	-1.54467	0.278492	0.168685	0.772923	N	0.123058	0.0870228	N	4	2.63326	0.0491856	0.355863	0.234119	0.654094	0.885762	0.837348	0.453452	1.73213	2.02237
568973138	UPI0003D7451F	coronin-6 isoform X2	Coro6	-0.610673	0.654891	-3.20791	-3.27027	0.0326539	0.0147508	1.83118	Y	0.0455507	0.0288518	Y	4	2.63326	0.0491856	0.0543583	0.0523049	0.316412	0.0850855	-0.285602	0.550024	0.794342	0.60355
153792534	Q9ERU9	E3 SUMO-protein ligase RanBP2 (EC 6.3.2.-) (Ran-binding protein 2) (RanBP2)	Ranbp2	-0.613297	0.653701	-5.27504	-4.21529	0.00619093	0.00446736	2.34995	Y	0.0432996	0.0256173	Y	4	2.63326	0.0491856	0.0202759	0.0317525	-1.73872	-1.94603	-1.94464	-1.43902	-1.11931	-1.23117
188219589	P14733	Lamin-B1	Lmnb1	-0.614764	0.653036	-4.05348	-3.74914	0.0154314	0.00791844	2.10136	Y	0.0432996	0.0256173	Y	4	2.63326	0.0491856	0.0345027	0.0403315	-0.220762	-0.310053	-0.233232	0.0768364	0.582303	0.421107
30061385	P10854	Histone H2B type 1-M (H2B 291B)	Hist1h2bm	-0.615222	0.65283	-2.7556	-2.96427	0.0510796	0.0223314	1.65108	Y	0.0541287	0.0335256	Y	4	2.63326	0.0491856	0.074769	0.0646129	0.926079	0.81091	0.909776	1.16211	1.91275	1.41757
20806109	Q921K2	Poly [ADP-ribose] polymerase (PARP) (EC 2.4.2.30)	Parp1	-0.618352	0.651415	-3.48516	-3.4567	0.0252334	0.0115314	1.93812	Y	0.0435604	0.0273793	Y	4	2.63326	0.0491856	0.047219	0.0479997	0.283662	-0.000581831	0.123788	0.447159	0.847948	0.966817
568971841	Q02257	Junction plakoglobin (Desmoplakin III) (Desmoplakin-3)	Jup	-0.619105	0.651075	-3.70032	-3.58053	0.0208296	0.00981932	2.00792	Y	0.0432996	0.0262277	Y	4	2.63326	0.0491856	0.0419895	0.0448462	0.162747	-0.203137	-0.338525	0.467383	0.632979	0.378038
568994554	UPI0003D7215F	disks large homolog 1 isoform X1	Dlg1	-0.620193	0.650584	-3.27195	-3.33019	0.0307328	0.0136209	1.86579	Y	0.0447269	0.0282565	Y	4	2.63326	0.0491856	0.0538931	0.0520243	-0.808439	-0.716501	-0.801152	-0.529399	0.0437423	0.0201443
569002902	UPI0000607F1A	synaptopodin isoform X1;synaptopodin isoform X2	Synpo	-0.620608	0.650397	-3.92107	-3.7007	0.0172321	0.00841969	2.0747	Y	0.0432996	0.0256173	Y	4	2.63326	0.0491856	0.0375765	0.0421851	0.138631	-0.239615	-0.38261	0.424918	0.518198	0.435114
238231384	Q60692	Proteasome subunit beta type-6 (EC 3.4.25.1) (Low molecular mass protein 19) (Macropain delta chain) (Multicatalytic endopeptidase complex delta chain) (Proteasome delta chain) (Proteasome subunit Y)	Psmb6	-0.626946	0.647546	-2.03479	-2.36518	0.111602	0.0519143	1.28471	N	0.0762077	0.0462092	Y	4	2.63326	0.0491856	0.1424	0.105396	-1.01708	-1.72379	-1.9276	-1.15366	-0.680311	-0.953661
568955816	Q921M3	Splicing factor 3B subunit 3 (Pre-mRNA-splicing factor SF3b 130 kDa subunit) (SF3b130) (Spliceosome-associated protein 130) (SAP 130)	Sf3b3	-0.628469	0.646862	-2.6778	-2.92286	0.055355	0.0236427	1.6263	Y	0.0555718	0.0340827	Y	4	2.63326	0.0491856	0.0826234	0.0693494	0.135194	-0.223817	-0.0824891	0.209115	0.937208	0.567973
7110703	P62196	26S proteasome regulatory subunit 8 (26S proteasome AAA-ATPase subunit RPT6) (Proteasome 26S subunit ATPase 5) (Proteasome subunit p45) (p45/SUG) (mSUG1)	Psmc5	-0.630485	0.645959	-3.64403	-3.57695	0.0218866	0.00986477	2.00591	Y	0.0432996	0.0262277	Y	4	2.63326	0.0491856	0.0449032	0.0466033	-0.461841	-0.860216	-0.847712	-0.317524	-0.00546592	0.0446761
190194418	E9Q557	Desmoplakin (DP)	Dsp	-0.634751	0.644052	-3.83466	-3.69316	0.0185441	0.00850076	2.07054	Y	0.0432996	0.0256173	Y	4	2.63326	0.0491856	0.0411003	0.04431	0.401675	0.0676403	-0.119176	0.724067	0.874753	0.655572
377837185	Q9D0T1	NHP2-like protein 1 (Fertilization antigen 1) (FA-1) (High mobility group-like nuclear protein 2 homolog 1) (Sperm-specific antigen 1) (U4/U6.U5 small nuclear ribonucleoprotein SNU13) (U4/U6.U5 tri-snRNP 15.5 kDa protein) [Cleaved into: NHP2-like protein 1, N-terminally processed]	Snu13	-0.637715	0.64273	-3.96941	-3.7721	0.0165468	0.00769236	2.11394	Y	0.0432996	0.0256173	Y	4	2.63326	0.0491856	0.0387161	0.0428723	-0.26342	-0.328412	-0.361403	0.259097	0.0817657	0.619046
31542273	Q8C7X2	ER membrane protein complex subunit 1	Emc1	-0.639969	0.641727	-3.60335	-3.5754	0.0226904	0.00988451	2.00504	Y	0.0432996	0.0262277	Y	4	2.63326	0.0491856	0.0473147	0.0480574	-0.995274	-1.23742	-1.28423	-0.820478	-0.479418	-0.297122
568955426	Q9D8X2	Coiled-coil domain-containing protein 124	Ccdc124	-0.644172	0.63986	-2.73348	-2.98708	0.052255	0.0216424	1.6647	Y	0.0541287	0.0333693	Y	4	2.63326	0.0491856	0.0833032	0.0697593	-0.256454	-0.527891	-0.71945	-0.214173	0.451269	0.191625
89363042	Q9JHU2	Palmdelphin	Palmd	-0.645933	0.63908	-1.88297	-2.22897	0.132825	0.0631459	1.19965	N	0.0819974	0.0502187	N	4	2.63326	0.0491856	0.176514	0.125967	0.456856	0.440364	0.115779	0.338137	1.24659	1.36607
152	#N/A	#N/A	#N/A	-0.64929	0.637594	-1.63804	-1.9779	0.176755	0.0907271	1.04226	N	0.0928764	0.0606544	N	4	2.63326	0.0491856	0.235678	0.161644	0.8652	1.07766	0.722954	0.795265	1.74838	2.07004
12963613	Q9D8B7	Junctional adhesion molecule C (JAM-C) (JAM-2) (Junctional adhesion molecule 3) (JAM-3)	Jam3	-0.651307	0.636703	-2.0296	-2.3764	0.112263	0.0510852	1.29171	N	0.0762484	0.0458755	Y	4	2.63326	0.0491856	0.154469	0.112674	0.846359	0.732374	0.468862	0.803407	1.84488	1.35323
124487358	Q14AA6	GTP-binding nuclear protein Ran	1700009N14Rik	-0.654172	0.63544	-4.24986	-3.95887	0.0131596	0.00609574	2.21497	Y	0.0432996	0.0256173	Y	4	2.63326	0.0491856	0.0355407	0.0409575	-0.496325	-0.959525	-0.781735	-0.230803	0.0221769	-0.0664434
86198329	E9Q5C9	Nucleolar and coiled-body phosphoprotein 1 (140 kDa nucleolar phosphoprotein) (Nopp140)	Nolc1	-0.657042	0.634177	-4.39209	-4.03525	0.0117634	0.00555098	2.25563	Y	0.0432996	0.0256173	Y	4	2.63326	0.0491856	0.0335687	0.0397683	0.980216	0.804376	0.689603	1.23596	1.58482	1.62454
21312236	Q9CZJ2	Heat shock 70 kDa protein 12B	Hspa12b	-0.660676	0.632582	-2.6415	-2.933	0.0574903	0.0233143	1.63238	Y	0.0566408	0.0340827	Y	4	2.63326	0.0491856	0.0938358	0.0761106	0.636313	0.406608	0.383547	0.663817	1.40072	1.34396
568951059	UPI0003D7493A	tripartite motif-containing protein 3 isoform X1	Trim3	-0.662136	0.631942	-2.3947	-2.72321	0.074785	0.03122	1.50557	Y	0.0638922	0.0357401	Y	4	2.63326	0.0491856	0.114679	0.0886793	-0.678051	-1.17994	-1.0285	-0.765725	-0.0878766	-0.0464824
239985513	Q925I1	ATPase family AAA domain-containing protein 3 (AAA-ATPase TOB3)	Atad3	-0.665336	0.630542	-3.52038	-3.57911	0.0244417	0.00983725	2.00713	Y	0.0435604	0.0262277	Y	4	2.63326	0.0491856	0.0535791	0.051835	-0.00711025	-0.183576	-0.234149	0.218322	0.828076	0.524776
568988017	UPI0003D6E331	LIM domain only protein 7 isoform X1	Lmo7	-0.668627	0.629105	-3.20842	-3.37682	0.0326379	0.0128066	1.89257	Y	0.0455507	0.0279209	Y	4	2.63326	0.0491856	0.0651444	0.0588091	-0.0726966	-0.430479	-0.622997	0.0443765	0.494195	0.341138
568913204	UPI0003D6F9CD	spectrin alpha chain, non-erythrocytic 1 isoform X2	Sptan1	-0.668866	0.629001	-3.62644	-3.65271	0.0222299	0.00895061	2.04815	Y	0.0432996	0.0257455	Y	4	2.63326	0.0491856	0.0510281	0.0502967	-0.104683	-0.558158	-0.619554	0.10861	0.406526	0.209067
121949760	Q61033	Lamina-associated polypeptide 2, isoforms alpha/zeta (Thymopoietin isoforms alpha/zeta) (TP alpha/zeta)	Tmpo	-0.670893	0.628118	-4.03393	-3.89314	0.0156825	0.0066118	2.17968	Y	0.0432996	0.0256173	Y	4	2.63326	0.0491856	0.0414898	0.0445449	-2.17276	-2.57096	-2.2306	-1.80951	-1.43997	-1.71216
247269309	Q99KK2	N-acylneuraminate cytidylyltransferase (EC 2.7.7.43) (CMP-N-acetylneuraminic acid synthase) (CMP-NeuNAc synthase)	Cmas	-0.671854	0.627699	-5.44832	-4.51053	0.0055126	0.00316189	2.50005	Y	0.0432996	0.0256173	Y	4	2.63326	0.0491856	0.0228095	0.0332803	0.239655	0.0511656	0.108083	0.603773	0.982528	0.828166
568947651	UPI0003D7889C	tight junction protein ZO-1 isoform X3	Tjp1	-0.675834	0.62597	-3.54802	-3.61782	0.023841	0.00935952	2.02875	Y	0.0433834	0.0262277	Y	4	2.63326	0.0491856	0.0544252	0.0523452	-0.764292	-1.07878	-1.07833	-0.597861	-0.0559463	-0.240092
160420308	Q8CGP2	Histone H2B type 1-P	Hist1h2bp	-0.676123	0.625845	-1.80127	-2.16002	0.146022	0.0697467	1.15648	N	0.0851797	0.0533803	N	4	2.63326	0.0491856	0.211341	0.146969	0.569892	0.204627	0.253879	0.642424	1.73356	0.680783
120407050	Q6DFW4	Nucleolar protein 58 (MSSP) (Nucleolar protein 5) (SIK-similar protein)	Nop58	-0.676676	0.625605	-4.27666	-4.03571	0.0128818	0.00554784	2.25588	Y	0.0432996	0.0256173	Y	4	2.63326	0.0491856	0.0375529	0.0421709	0.303271	-0.0117279	0.0679758	0.548807	0.967938	0.872802
22122615	Q8R5C5	Beta-centractin (Actin-related protein 1B) (ARP1B)	Actr1b	-0.678754	0.624705	-3.71604	-3.72876	0.0205454	0.00812525	2.09016	Y	0.0432996	0.0256173	Y	4	2.63326	0.0491856	0.0500444	0.0497035	0.0116678	-0.278476	-0.142515	0.253129	0.814556	0.559253
28827824	Q99KI3	ER membrane protein complex subunit 3 (Transmembrane protein 111)	Emc3	-0.681866	0.623358	-1.09106	-1.36773	0.336562	0.215926	0.665695	N	0.139009	0.102226	N	4	2.63326	0.0491856	0.585856	0.37281	-1.0593	-1.07361	-0.713919	-1.38049	-0.158106	0.737366
568956485	UPI0003D76942	ubiquitin carboxyl-terminal hydrolase 10 isoform X1	Usp10	-0.688659	0.62043	-3.7974	-3.79963	0.0191465	0.0074306	2.12898	Y	0.0432996	0.0256173	Y	4	2.63326	0.0491856	0.0493319	0.0492738	0.93727	0.71542	0.677974	1.15732	1.7078	1.53152
568912266	E9QAU4	Enhancer trap locus 4	Etl4	-0.688913	0.620321	-2.52427	-2.86224	0.0650599	0.0257125	1.58986	Y	0.0593987	0.0340827	Y	4	2.63326	0.0491856	0.111724	0.0868977	-0.247178	-0.783867	-0.957938	-0.311343	0.164776	0.224324
161484668	P62141	Serine/threonine-protein phosphatase PP1-beta catalytic subunit (PP-1B) (EC 3.1.3.16) (EC 3.1.3.53)	Ppp1cb	-0.690207	0.619765	-4.35152	-4.111	0.0121426	0.00506321	2.29557	Y	0.0432996	0.0256173	Y	4	2.63326	0.0491856	0.037737	0.0422819	-0.73108	-0.803712	-0.808993	-0.28513	0.21889	-0.206925
78191777	Q8BPM0	Disheveled-associated activator of morphogenesis 1	Daam1	-0.690911	0.619462	-2.7343	-3.04395	0.052211	0.0200214	1.69851	Y	0.0541287	0.0318759	Y	4	2.63326	0.0491856	0.095773	0.0772788	0.285243	-0.140972	-0.14872	0.30525	1.02	0.743035
38490561	P55284	Cadherin-5 (Vascular endothelial cadherin) (VE-cadherin) (CD antigen CD144)	Cdh5	-0.691134	0.619367	-3.47055	-3.59636	0.0255707	0.00962113	2.01677	Y	0.0435604	0.0262277	Y	4	2.63326	0.0491856	0.0594864	0.0553972	0.156365	-0.225512	-0.28698	0.293543	0.766158	0.657573
21311873	Q9CQZ1	Heat shock factor-binding protein 1	Hsbp1	-0.691959	0.619013	-3.50479	-3.62076	0.0247884	0.00932432	2.03038	Y	0.0435604	0.0262277	Y	4	2.63326	0.0491856	0.0584692	0.0547838	0.655761	0.261414	0.26306	0.792451	1.20075	1.26291
31982757	P97379	Ras GTPase-activating protein-binding protein 2 (G3BP-2) (GAP SH3 domain-binding protein 2)	G3bp2	-0.693042	0.618548	-3.63045	-3.70488	0.0221511	0.00837512	2.07701	Y	0.0432996	0.0256173	Y	4	2.63326	0.0491856	0.0546626	0.0524884	-0.922579	-0.965512	-1.21155	-0.671054	-0.228574	-0.120887
116063550	Q8BZ52	Fibronectin type III and SPRY domain-containing protein 2 (SPRY domain-containing protein 1)	Fsd2	-0.69481	0.617791	-3.97747	-3.91989	0.0164358	0.00639624	2.19408	Y	0.0432996	0.0256173	Y	4	2.63326	0.0491856	0.0457731	0.0471278	-1.33316	-1.38199	-1.38761	-0.975252	-0.373111	-0.669966
30061353	Q8BFU2	Histone H2A type 3	Hist3h2a	-0.695401	0.617538	-3.74263	-3.78049	0.0200752	0.00761156	2.11853	Y	0.0432996	0.0256173	Y	4	2.63326	0.0491856	0.0517856	0.0507535	-0.689479	-0.801929	-0.623975	-0.246383	0.339829	-0.122625
19705424	P14685	26S proteasome non-ATPase regulatory subunit 3 (26S proteasome regulatory subunit RPN3) (26S proteasome regulatory subunit S3) (Proteasome subunit p58) (Transplantation antigen P91A) (Tum-P91A antigen)	Psmd3	-0.701302	0.615017	-2.69925	-3.02569	0.0541365	0.0205271	1.68767	Y	0.0549762	0.0320833	Y	4	2.63326	0.0491856	0.101255	0.0805845	-0.283106	-0.700471	-0.688384	-0.297121	0.376758	0.352308
7106331	P27661	Histone H2AX (H2a/x) (Histone H2A.X)	H2afx	-0.705784	0.613109	-3.17558	-3.41137	0.0336772	0.0122372	1.91232	Y	0.0455507	0.0276961	Y	4	2.63326	0.0491856	0.0740948	0.0642064	0.61422	-0.0354098	0.203727	0.839586	1.19788	0.862423
21312960	Q9CQ73	Plakophilin 2	Pkp2	-0.706499	0.612806	-3.71471	-3.78562	0.0205692	0.00756258	2.12133	Y	0.0432996	0.0256173	Y	4	2.63326	0.0491856	0.054258	0.0522444	0.483011	0.0392818	-0.144994	0.861326	0.878359	0.75711
569002163	UPI0003D772AC	KN motif and ankyrin repeat domain-containing protein 3 isoform X1	Kank3	-0.713369	0.609894	-3.30217	-3.51624	0.0298727	0.0106708	1.9718	Y	0.0447269	0.0273085	Y	4	2.63326	0.0491856	0.0700038	0.0617394	0.255337	0.0440471	-0.0100861	0.409536	1.02326	0.996609
568950761	A0A1B0GSX7	Nuclear pore complex protein Nup98-Nup96	Nup98	-0.714518	0.609409	-4.05166	-4.00864	0.0154546	0.0057344	2.24151	Y	0.0432996	0.0256173	Y	4	2.63326	0.0491856	0.0466499	0.0476566	0.333208	0.0120001	0.153586	0.583974	1.06544	0.992933
225543548	A2AMM0	Caveolae-associated protein 4 (Muscle-related coiled-coil protein) (Muscle-restricted coiled-coil protein)	Cavin4	-0.715289	0.609083	-1.68926	-2.05516	0.166436	0.0811487	1.09072	N	0.0896791	0.0569189	N	4	2.63326	0.0491856	0.268943	0.181704	0.128266	0.486208	0.247793	0.182765	1.39165	1.43372
1039743392	UPI0007ECEC8A	ryanodine receptor 2 isoform X7	Ryr2	-0.715432	0.609023	-2.9488	-3.24817	0.0420197	0.0151928	1.81836	Y	0.0492384	0.0289057	Y	4	2.63326	0.0491856	0.0882956	0.0727698	-0.357138	-0.513833	-0.688375	-0.245116	0.474591	0.357476
569004016	UPI0003D75E2A	actin-binding LIM protein 3 isoform X5	Ablim3	-0.719184	0.607441	-3.14275	-3.40559	0.0347557	0.0123304	1.90902	Y	0.0455507	0.0276961	Y	4	2.63326	0.0491856	0.0785512	0.0668937	-1.51759	-1.83998	-1.94481	-1.39176	-0.738538	-1.01453
205361112	Q99M87	DnaJ homolog subfamily A member 3, mitochondrial (DnaJ protein Tid-1) (mTid-1) (Tumorous imaginal discs protein Tid56 homolog)	Dnaja3	-0.7307	0.602611	-4.65724	-4.37763	0.00960936	0.00368824	2.43318	Y	0.0432996	0.0256173	Y	4	2.63326	0.0491856	0.0369244	0.0417918	0.108739	-0.119499	-0.085455	0.418895	0.838197	0.838794
229608946	Q921T2	Torsin-1A-interacting protein 1 (Lamina-associated polypeptide 1B) (LAP1B)	Tor1aip1	-0.734505	0.601024	-3.55816	-3.73305	0.023625	0.00808122	2.09252	Y	0.0433834	0.0256173	Y	4	2.63326	0.0491856	0.063919	0.0580702	-0.943352	-1.25705	-1.22468	-0.740221	-0.118654	-0.362691
308153287	Q3U6D2	Uncharacterized protein	Rcc1	-0.737819	0.599645	-4.19193	-4.14412	0.0137851	0.004865	2.31292	Y	0.0432996	0.0256173	Y	4	2.63326	0.0491856	0.046469	0.0475475	1.21029	0.866445	0.767427	1.46674	1.84926	1.74162
11230778	P49813	Tropomodulin-1 (Erythrocyte tropomodulin) (E-Tmod)	Tmod1	-0.739778	0.598832	-4.12832	-4.11109	0.0145137	0.00506264	2.29562	Y	0.0432996	0.0256173	Y	4	2.63326	0.0491856	0.0481667	0.0485712	0.804773	0.405163	0.432091	1.04653	1.46252	1.35231
114326497	E9QN70	Laminin subunit beta-1	Lamb1	-0.743443	0.597312	-3.44408	-3.66644	0.0261958	0.00879502	2.05576	Y	0.0435604	0.0257304	Y	4	2.63326	0.0491856	0.0698941	0.0616733	0.354677	0.0842726	0.0178831	0.518953	1.12279	1.04542
150	#N/A	#N/A	#N/A	-0.744836	0.596736	-1.84941	-2.23735	0.138085	0.0623874	1.2049	N	0.082905	0.0502187	N	4	2.63326	0.0491856	0.243304	0.166243	0.133346	0.162723	0.119487	0.0785248	1.26827	1.30327
568917422	UPI0003D6F779	cordon-bleu protein-like 1 isoform X1	Cobll1	-0.759583	0.590667	-1.89676	-2.2931	0.130727	0.0575767	1.23975	N	0.0814085	0.0483379	Y	4	2.63326	0.0491856	0.240558	0.164587	-2.18897	-2.41265	-2.3012	-2.32317	-1.04954	-1.25136
439253893	P68134	Actin, alpha skeletal muscle (Alpha-actin-1)	Acta1	-0.760531	0.590279	-4.61121	-4.43395	0.00994663	0.00345416	2.46166	Y	0.0432996	0.0256173	Y	4	2.63326	0.0491856	0.0408033	0.0441309	0.49627	0.1137	0.271284	1.00008	1.28738	0.875386
6677777	P61255	60S ribosomal protein L26 (Silica-induced gene 20 protein) (SIG-20)	Rpl26	-0.7644	0.588698	-3.76166	-3.92553	0.0197464	0.00635173	2.19711	Y	0.0432996	0.0256173	Y	4	2.63326	0.0491856	0.0619403	0.056877	0.435133	0.225454	0.416795	0.823923	1.48087	1.06579
755562948	UPI0005ABA5B3	sorbin and SH3 domain-containing protein 1 isoform X19	Sorbs1	-0.771051	0.58599	-4.33206	-4.30222	0.0123297	0.00402969	2.39473	Y	0.0432996	0.0256173	Y	4	2.63326	0.0491856	0.0475191	0.0481807	1.24261	1.02368	0.929937	1.53504	2.02109	1.95325
84490394	Q3UGX2	Spectrin beta chain	Sptb	-0.772208	0.585521	-4.01194	-4.1067	0.0159708	0.00508959	2.29332	Y	0.0432996	0.0256173	Y	4	2.63326	0.0491856	0.0555712	0.0530363	-0.213332	-0.33201	-0.353499	0.158524	0.807009	0.452249
256773195	E9QLJ0	Cardiomyopathy-associated protein 5	Cmya5	-0.775128	0.584337	-3.08748	-3.43149	0.0366639	0.0119183	1.92379	Y	0.0463484	0.0273793	Y	4	2.63326	0.0491856	0.0945429	0.0765371	-0.296649	-0.662494	-0.650089	-0.187526	0.550179	0.353498
7305509	P63163	Small nuclear ribonucleoprotein-associated protein N (snRNP-N) (Sm protein D) (Sm-D) (Sm protein N) (Sm-N) (SmN) (Tissue-specific-splicing protein)	Snrpn	-0.776106	0.583941	-3.38465	-3.66989	0.0276662	0.00875642	2.05767	Y	0.0435604	0.0257304	Y	4	2.63326	0.0491856	0.0788687	0.0670851	0.589439	0.437021	0.308587	0.792454	1.44783	1.42308
262331578	P17095	High mobility group protein HMG-I/HMG-Y (HMG-I(Y)) (High mobility group AT-hook protein 1) (High mobility group protein A1)	Hmga1	-0.780131	0.582314	-6.01169	-5.12491	0.00385494	0.00160361	2.7949	Y	0.0432996	0.0256173	Y	4	2.63326	0.0491856	0.02526	0.034758	0.000280574	-0.395497	-0.244802	0.491	0.525256	0.684119
260166642	Q02248	Catenin beta-1 (Beta-catenin)	Ctnnb1	-0.780193	0.582289	-3.61092	-3.8452	0.0225382	0.00701848	2.15376	Y	0.0432996	0.0256173	Y	4	2.63326	0.0491856	0.0700262	0.061753	-0.834763	-1.12894	-1.31815	-0.602018	-0.305267	-0.0339884
568953823	UPI0003D70AE9	ankyrin-1 isoform X1	Ank1	-0.790517	0.578137	-2.52523	-2.94379	0.0649936	0.0229701	1.63884	Y	0.0593987	0.0339273	Y	4	2.63326	0.0491856	0.146998	0.108169	-1.08375	-0.867161	-0.966685	-0.724618	0.337135	-0.158562
9789907	Q9WUD1	STIP1 homology and U box-containing protein 1 (EC 2.3.2.27) (Carboxy terminus of Hsp70-interacting protein) (E3 ubiquitin-protein ligase CHIP) (RING-type E3 ubiquitin transferase CHIP)	Stub1	-0.793378	0.576992	-2.45985	-2.88269	0.0697025	0.0249937	1.60217	Y	0.0613593	0.0340827	Y	4	2.63326	0.0491856	0.156039	0.113621	-1.68359	-1.7165	-1.94061	-1.28405	-1.31394	-0.362576
47059073	Q3TR40	Uncharacterized protein	Thbs1	-0.800138	0.574294	-1.10955	-1.40006	0.329405	0.20649	0.685101	N	0.137491	0.0987144	N	4	2.63326	0.0491856	0.780065	0.489922	-0.963162	-1.63807	-0.668633	-1.2434	0.981411	-0.607463
568905919	P05977	Myosin light chain 1/3, skeletal muscle isoform (MLC1/MLC3) (MLC1F/MLC3F) (Myosin light chain alkali 1/2) (Myosin light chain A1/A2)	Myl1	-0.800726	0.57406	-5.02137	-4.75553	0.00737822	0.00239658	2.62041	Y	0.0432996	0.0256173	Y	4	2.63326	0.0491856	0.038143	0.0425267	-0.663176	-0.827452	-0.940612	-0.274316	0.188234	0.0570203
1039771204	Q99JY0	Trifunctional enzyme subunit beta, mitochondrial (TP-beta) [Includes: 3-ketoacyl-CoA thiolase (EC 2.3.1.16) (Acetyl-CoA acyltransferase) (Beta-ketothiolase)]	Hadhb	-0.803917	0.572792	-3.81043	-4.02671	0.0189332	0.00560914	2.2511	Y	0.0432996	0.0256173	Y	4	2.63326	0.0491856	0.0667677	0.059788	0.809545	0.620572	0.665121	1.10878	1.78637	1.61184
958157207	P55292	Desmocollin-2 (Epithelial type 2 desmocollin)	Dsc2	-0.807608	0.571328	-4.13046	-4.2523	0.0144885	0.0042749	2.36907	Y	0.0432996	0.0256173	Y	4	2.63326	0.0491856	0.0573451	0.054106	-0.339407	-0.510319	-0.642128	-0.039204	0.480027	0.490148
161016843	O55111	Desmoglein-2	Dsg2	-0.808422	0.571006	-3.3178	-3.65883	0.029439	0.00888086	2.05154	Y	0.0447269	0.0257455	Y	4	2.63326	0.0491856	0.0890568	0.0732288	-0.0936502	-0.373768	-0.563757	0.0624051	0.694261	0.637424
569004387	Q8CBY8	Dynactin subunit 4 (Dynactin subunit p62)	Dctn4	-0.812189	0.569517	-3.50124	-3.80901	0.0248683	0.00734363	2.13409	Y	0.0435604	0.0256173	Y	4	2.63326	0.0491856	0.0807165	0.0681994	-1.94513	-2.1235	-1.92775	-1.63335	-0.960545	-0.965917
56090652	Q8R0Y8	Mitochondrial coenzyme A transporter SLC25A42 (Solute carrier family 25 member 42)	Slc25a42	-0.812397	0.569435	-2.35969	-2.79485	0.0776891	0.0282412	1.54912	Y	0.0650411	0.0344853	Y	4	2.63326	0.0491856	0.177794	0.126739	0.731976	0.311603	0.0593313	0.6291	1.56719	1.34381
755528293	UPI0003D70E3D	pleckstrin homology-like domain family B member 1 isoform X1	Phldb1	-0.819325	0.566707	-2.37426	-2.81312	0.0764652	0.0275307	1.56018	Y	0.064425	0.0343866	Y	4	2.63326	0.0491856	0.178627	0.127241	0.0884135	-0.788279	-0.67871	0.130211	0.773828	0.17536
326633194	Q9ET78	Junctophilin-2 (JP-2) (Junctophilin type 2)	Jph2	-0.828728	0.563026	-2.62059	-3.0605	0.0587632	0.0195746	1.70831	Y	0.0572294	0.0317545	Y	4	2.63326	0.0491856	0.150009	0.109984	0.207771	-0.243215	-0.229281	0.235833	1.20077	0.784855
228008337	O88685	26S proteasome regulatory subunit 6A (26S proteasome AAA-ATPase subunit RPT5) (Proteasome 26S subunit ATPase 3) (Tat-binding protein 1) (TBP-1)	Psmc3	-0.829497	0.562725	-2.16874	-2.60707	0.0959453	0.0367732	1.43447	Y	0.0717825	0.0387297	Y	4	2.63326	0.0491856	0.219435	0.15185	-1.02477	-1.8659	-1.71446	-1.21059	-0.66878	-0.237269
68226431	Q64524	Histone H2B type 2-E (H2b 613)	Hist2h2be	-0.829917	0.562562	-2.44651	-2.891	0.0707105	0.0247076	1.60717	Y	0.061925	0.0340827	Y	4	2.63326	0.0491856	0.17261	0.123613	-0.705265	-0.799936	-0.693036	-0.500468	0.667868	0.124113
225543191	Q8CJ40	Rootletin (Ciliary rootlet coiled-coil protein)	Crocc	-0.831512	0.56194	-2.35533	-2.80027	0.0780596	0.0280284	1.5524	Y	0.0650411	0.0343866	Y	4	2.63326	0.0491856	0.18695	0.13226	0.687574	0.473876	0.517645	0.709432	1.62012	1.84408
755493325	UPI0005ABB425	striated muscle-specific serine/threonine-protein kinase isoform X1	Speg	-0.833951	0.560991	-4.62824	-4.61913	0.00982015	0.00279339	2.55387	Y	0.0432996	0.0256173	Y	4	2.63326	0.0491856	0.0487012	0.0488935	-0.227295	-0.526126	-0.58329	0.146099	0.639241	0.379802
1039772846	UPI0007EC7CC7	SUN domain-containing protein 1 isoform X1	Sun1	-0.840086	0.55861	-5.18378	-4.94557	0.00658916	0.00194444	2.71121	Y	0.0432996	0.0256173	Y	4	2.63326	0.0491856	0.0393954	0.0432819	-1.06103	-1.50159	-1.31428	-0.647777	-0.319482	-0.389382
33859811	Q8BMS1	Trifunctional enzyme subunit alpha, mitochondrial (TP-alpha) [Includes: Long-chain enoyl-CoA hydratase (EC 4.2.1.17); Long chain 3-hydroxyacyl-CoA dehydrogenase (EC 1.1.1.211)]	Hadha	-0.84052	0.558442	-3.43858	-3.79524	0.026328	0.00747172	2.12658	Y	0.0435604	0.0256173	Y	4	2.63326	0.0491856	0.089625	0.0735714	0.306097	0.106884	0.0881686	0.546369	1.30981	1.16653
77812699	Q3TZL3	Uncharacterized protein (Fragment)	Ttn	-0.845319	0.556588	-2.79751	-3.23983	0.0489359	0.0153633	1.81352	Y	0.0533286	0.0289057	Y	4	2.63326	0.0491856	0.136959	0.102115	0.537509	-0.17643	-0.168264	0.608882	1.25518	0.864709
569007129	UPI0003D72A37	actin-binding LIM protein 1 isoform X1	Ablim1	-0.84875	0.555266	-2.63168	-3.08402	0.058084	0.0189576	1.72222	Y	0.0570599	0.0313348	Y	4	2.63326	0.0491856	0.156022	0.11361	0.561916	0.271358	0.0393317	0.603175	1.57414	1.24154
8393534	P09602	Non-histone chromosomal protein HMG-17 (High mobility group nucleosome-binding domain-containing protein 2)	Hmgn2	-0.853198	0.553556	-1.86472	-2.28632	0.135657	0.0581406	1.23552	N	0.08253	0.0484209	Y	4	2.63326	0.0491856	0.314024	0.208889	0.855812	-0.213053	0.11224	1.05428	1.70106	0.559253
256985119	Q65CL1	Catenin alpha-3 (Alpha T-catenin) (Cadherin-associated protein)	Ctnna3	-0.854129	0.553199	-4.38392	-4.50745	0.0118386	0.0031731	2.49852	Y	0.0432996	0.0256173	Y	4	2.63326	0.0491856	0.0569394	0.0538613	0.194095	0.134186	-0.291124	0.687167	1.09679	0.815588
41281771	Q9Z2Y3	Homer protein homolog 1 (Homer-1) (VASP/Ena-related gene up-regulated during seizure and LTP 1) (Vesl-1)	Homer1	-0.858717	0.551443	-2.17901	-2.62925	0.0948492	0.0356377	1.44809	Y	0.0717545	0.038481	Y	4	2.63326	0.0491856	0.232955	0.160003	-0.833101	-1.18351	-1.22534	-0.969512	0.132967	0.170746
390190197	A0A0A0MQ68	Glutaryl-CoA dehydrogenase, mitochondrial	Gcdh	-0.858893	0.551376	-3.32877	-3.72506	0.029139	0.00816338	2.08813	Y	0.0447269	0.0256173	Y	4	2.63326	0.0491856	0.0998622	0.0797447	-0.371676	-0.131589	-0.357915	0.0820345	0.857004	0.77646
1039776040	UPI0003D6FD79	mitochondrial inner membrane protein isoform X3;MICOS complex subunit Mic60 isoform X3	Immt	-0.858993	0.551337	-3.18087	-3.59813	0.0335072	0.00959928	2.01776	Y	0.0455507	0.0262277	Y	4	2.63326	0.0491856	0.10939	0.0854902	-0.824834	-1.33304	-1.30904	-0.721677	-0.0513663	-0.116892
568915379	UPI0000F4D76A	erythrocyte membrane protein band 4.2 isoform X1	Epb42	-0.862468	0.550011	-3.51593	-3.88424	0.0245401	0.00668532	2.17488	Y	0.0435604	0.0256173	Y	4	2.63326	0.0491856	0.0902606	0.0739547	0.311733	0.721524	0.55783	0.986652	1.71524	1.4766
114326499	Q9QVP4	Myosin regulatory light chain 2, atrial isoform (MLC-2a) (MLC2a) (Myosin light chain 2a) (Myosin regulatory light chain 7)	Myl7	-0.862876	0.549855	-1.08387	-1.37258	0.339384	0.214486	0.668602	N	0.139761	0.101826	N	4	2.63326	0.0491856	0.950673	0.592802	0.812198	-1.1291	-0.537028	-0.206476	1.6411	0.300074
59958370	Q5EBG6	Heat shock protein beta-6 (HspB6)	Hspb6	-0.864104	0.549388	-3.01506	-3.4551	0.039354	0.0115556	1.93721	Y	0.0484126	0.0273793	Y	4	2.63326	0.0491856	0.123206	0.0938215	0.773804	0.473876	0.406081	0.891413	1.63013	1.72453
568921502	UPI0003D70762	leucine-rich repeat-containing protein 39 isoform X1	Lrrc39	-0.865222	0.548962	-2.35072	-2.81144	0.0784538	0.0275952	1.55917	Y	0.0651247	0.0343866	Y	4	2.63326	0.0491856	0.20321	0.142066	-1.03752	-1.02767	-1.20868	-0.951502	0.173658	0.099639
145279175	Q62234	Myomesin-1(Myomesin family member 1) (Skelemin	Myom1	-0.875484	0.545071	-6.19588	-5.53074	0.00345023	0.00105332	2.97744	Y	0.0432996	0.0256173	Y	4	2.63326	0.0491856	0.029949	0.0375855	0.260203	-0.17103	-0.0168806	0.844059	1.02652	0.828166
269954677	Q8BML9	Glutamine--tRNA ligase (EC 6.1.1.18) (Glutaminyl-tRNA synthetase) (GlnRS)	Qars	-0.87857	0.543906	-4.50834	-4.63575	0.0107537	0.00274134	2.56204	Y	0.0432996	0.0256173	Y	4	2.63326	0.0491856	0.0569654	0.053877	-0.101672	-0.373442	-0.218149	0.344076	0.637015	0.961355
568912574	UPI0003D6E321	nebulette isoform X1	Nebl	-0.883126	0.542191	-4.1867	-4.42405	0.0138433	0.00349409	2.45667	Y	0.0432996	0.0256173	Y	4	2.63326	0.0491856	0.066741	0.0597719	0.402538	0.0362745	-0.0653769	0.700414	1.20742	1.11498
755551237	UPI0005AB9B0A	fibrocystin-L isoform X1	Pkhd1l1	-0.883547	0.542033	-4.32824	-4.52383	0.0123669	0.00311398	2.50668	Y	0.0432996	0.0256173	Y	4	2.63326	0.0491856	0.062507	0.0572187	1.30233	0.955134	0.923445	1.61574	2.11729	2.09852
568931328	UPI0003D77CF2	protein 4.1 isoform X12	Epb41	-0.884482	0.541682	-3.39143	-3.80507	0.0274936	0.00738006	2.13194	Y	0.0435604	0.0256173	Y	4	2.63326	0.0491856	0.102024	0.0810484	-0.591296	-0.613477	-0.721299	-0.19671	0.695624	0.228461
755498872	Q3UIK0	Myosin-binding protein C, cardiac-type	Mybpc3	-0.886044	0.541096	-3.99136	-4.28616	0.0162466	0.0041068	2.3865	Y	0.0432996	0.0256173	Y	4	2.63326	0.0491856	0.0739198	0.0641009	0.511858	0.0699786	0.0453237	0.780651	1.32133	1.18331
110625761	Q8JZQ2	AFG3-like protein 2 (EC 3.4.24.-)	Afg3l2	-0.893536	0.538293	-2.06795	-2.52124	0.10748	0.0415371	1.38156	Y	0.0747982	0.0418225	Y	4	2.63326	0.0491856	0.28005	0.188402	-1.34	-1.82674	-1.7222	-1.54632	-0.377032	-0.284981
157951643	Q9JI91	Alpha-actinin-2 (Alpha-actinin skeletal muscle isoform 2) (F-actin cross-linking protein)	Actn2	-0.901123	0.53547	-4.04478	-4.34826	0.0155425	0.00381724	2.41825	Y	0.0432996	0.0256173	Y	4	2.63326	0.0491856	0.0744508	0.0644211	0.67704	0.372339	0.21386	0.971949	1.45889	1.53577
257467675	D3Z7X0	Acyl-Coenzyme A dehydrogenase family, member 12 (MCG142036)	Acad12	-0.921869	0.527825	-4.36957	-4.61756	0.0119721	0.00279837	2.5531	Y	0.0432996	0.0256173	Y	4	2.63326	0.0491856	0.0667656	0.0597867	0.478008	0.182307	0.261958	0.874991	1.53283	1.28006
236461014	P97443	Histone-lysine N-methyltransferase Smyd1 (EC 2.1.1.43) (CD8b-opposite) (SET and MYND domain-containing protein 1) (Zinc finger protein BOP) (m-BOP)	Smyd1	-0.928786	0.5253	-3.83821	-4.22491	0.0184878	0.00441644	2.35493	Y	0.0432996	0.0256173	Y	4	2.63326	0.0491856	0.0878345	0.0724917	0.157541	-0.227337	-0.205801	0.438749	1.13598	0.936033
19526481	P08032	Spectrin alpha chain, erythrocytic 1 (Erythroid alpha-spectrin)	Spta1	-0.934838	0.523101	-3.46075	-3.91498	0.0258	0.00643521	2.19144	Y	0.0435604	0.0256173	Y	4	2.63326	0.0491856	0.109452	0.0855273	-0.558368	-0.442094	-0.475319	0.0261198	0.942906	0.359706
295390613	A2AL78	Aspartyl/asparaginyl beta-hydroxylase	Asph	-0.935584	0.522831	-2.72461	-3.22576	0.0527355	0.0156555	1.80533	Y	0.0541287	0.0289057	Y	4	2.63326	0.0491856	0.176868	0.126181	0.872053	0.608973	0.700392	1.00454	2.09666	1.88697
226437651	E9Q9K5	Triadin	Trdn	-0.945757	0.519157	-2.91825	-3.4227	0.043319	0.0120565	1.91878	Y	0.0499372	0.0275123	Y	4	2.63326	0.0491856	0.157545	0.114528	1.05655	0.84271	0.74685	1.21065	2.07078	2.20195
6671672	P47754	F-actin-capping protein subunit alpha-2 (CapZ alpha-2)	Capza2	-0.955426	0.515689	-5.10329	-5.16988	0.00696664	0.001529	2.81559	Y	0.0432996	0.0256173	Y	4	2.63326	0.0491856	0.0525758	0.05123	0.577265	0.1137	0.240277	1.01382	1.40202	1.38168
568936906	UPI0003D7892B	myosin regulatory light chain 2, ventricular/cardiac muscle isoform isoform X1	Myl2	-0.956593	0.515272	-3.4963	-3.96664	0.0249798	0.00603772	2.21913	Y	0.0435604	0.0256173	Y	4	2.63326	0.0491856	0.112287	0.087237	0.23175	-0.0594893	-0.0278134	0.509606	1.37548	1.12914
108	#N/A	#N/A	#N/A	-0.966354	0.511798	-3.32019	-3.81686	0.0293733	0.00727179	2.13836	Y	0.0447269	0.0256173	Y	4	2.63326	0.0491856	0.127069	0.0961508	-1.26902	-1.18926	-0.943074	0.352212	-0.578075	-0.276428
145279198	Q62234	Myomesin-1(Myomesin family member 1) (Skelemin	Myom1	-0.96917	0.5108	-3.9379	-4.3542	0.0169897	0.00379077	2.42127	Y	0.0432996	0.0256173	Y	4	2.63326	0.0491856	0.0908575	0.0743147	1.24487	0.849411	0.787309	1.56456	2.25411	1.97043
154350222	Q920B9	FACT complex subunit SPT16 (Chromatin-specific transcription elongation factor 140 kDa subunit) (FACT 140 kDa subunit) (FACTp140) (Facilitates chromatin transcription complex subunit SPT16)	Supt16h	-0.975596	0.50853	-1.37803	-1.73754	0.240261	0.128222	0.892036	N	0.110486	0.0732734	N	4	2.63326	0.0491856	0.751825	0.472892	-0.810895	-2.35075	-2.37214	-1.67888	-0.922537	-0.0055801
568971525	UPI0003D73F3F	beta-enolase isoform X1	Eno3	-0.98705	0.504508	-2.71712	-3.24374	0.0531445	0.0152831	1.81579	Y	0.0542517	0.0289057	Y	4	2.63326	0.0491856	0.197948	0.138893	0.447616	-0.097029	0.148117	0.569965	1.70242	1.18747
21703762	Q99JX4	Eukaryotic translation initiation factor 3 subunit M (eIF3m) (PCI domain-containing protein 1)	Eif3m	-0.988227	0.504097	-3.43607	-3.94043	0.0263884	0.0062359	2.2051	Y	0.0435604	0.0256173	Y	4	2.63326	0.0491856	0.124074	0.0943447	1.99308	1.42174	1.73544	2.23413	2.9386	2.94221
568930495	UPI0003D79114	F-actin-capping protein subunit beta isoform X1	Capzb	-0.990521	0.503296	-3.82603	-4.28504	0.0186814	0.00411226	2.38592	Y	0.0432996	0.0256173	Y	4	2.63326	0.0491856	0.100536	0.0801509	0.636845	0.348505	0.193953	0.935866	1.62083	1.59417
1039766553	UPI0001E6B788	alpha-enolase isoform X3;alpha-enolase isoform X2	Eno1	-0.99505	0.501718	-4.07354	-4.49525	0.0151787	0.00321794	2.49242	Y	0.0432996	0.0256173	Y	4	2.63326	0.0491856	0.0895028	0.0734978	0.633537	0.141124	0.282845	0.979747	1.64673	1.41618
1039764587	Q9JLH8	Tropomodulin-4 (Skeletal muscle tropomodulin) (Sk-Tmod)	Tmod4	-1.00015	0.499949	-2.38104	-2.89426	0.0759032	0.0245963	1.60913	Y	0.0641518	0.0340827	Y	4	2.63326	0.0491856	0.264658	0.17912	-2.49981	-1.8749	-2.04043	-1.80802	-0.50664	-1.10004
14192922	P68033	Actin, alpha cardiac muscle 1 (Alpha-cardiac actin)	Actc1	-1.01483	0.494886	-4.27064	-4.67766	0.0129435	0.00261478	2.58256	Y	0.0432996	0.0256173	Y	4	2.63326	0.0491856	0.0847018	0.0706027	0.140753	-0.484355	-0.316004	0.592592	1.08072	0.711577
568952281	UPI00002187D1	AP-2 complex subunit alpha-2 isoform X1	Ap2a2	-1.01787	0.493845	-7.31813	-6.47879	0.00185496	0.000426703	3.36987	Y	0.0432996	0.0256173	Y	4	2.63326	0.0491856	0.0290185	0.0370244	-0.144188	-0.354827	-0.565417	0.543926	0.777708	0.667544
10946916	Q9JJW5	Myozenin-2 (Calsarcin-1) (FATZ-related protein 2)	Myoz2	-1.02048	0.492951	-4.37925	-4.77038	0.0118819	0.00235731	2.62758	Y	0.0432996	0.0256173	Y	4	2.63326	0.0491856	0.0814523	0.0686431	0.451941	0.0914285	0.011465	0.826285	1.40035	1.38965
225703070	Q9CXS4	Centromere protein V (CENP-V) (Proline-rich protein 6)	Cenpv	-1.03421	0.488283	-3.56695	-4.09734	0.0234396	0.00514758	2.2884	Y	0.0433834	0.0256173	Y	4	2.63326	0.0491856	0.1261	0.0955667	-0.511173	-0.917228	-0.797248	-0.221425	0.652762	0.445649
33563264	P09542	Myosin light chain 3 (Myosin alkali light chain 1, ventricular/slow skeletal muscle isoform) (Myosin light chain 1, slow-twitch muscle B/ventricular isoform) (MLC1SB)	Myl3	-1.03749	0.487175	-3.6737	-4.19685	0.0213216	0.00456685	2.34038	Y	0.0432996	0.0256173	Y	4	2.63326	0.0491856	0.119632	0.0916666	0.402554	-0.0575728	-0.000515159	0.707248	1.54157	1.20811
755534914	UPI0005ABA07F	ADAMTS-like protein 5 isoform X1	Adamtsl5	-1.04621	0.48424	-3.60923	-4.14569	0.022572	0.0048558	2.31374	Y	0.0432996	0.0256173	Y	4	2.63326	0.0491856	0.126036	0.0955284	-0.266216	-0.409154	-0.465992	0.119284	1.0713	0.806673
110	P05630	ATP synthase subunit delta, mitochondrial (F-ATPase delta subunit)	ATP5D	-1.05776	0.480377	-3.60342	-4.14958	0.022689	0.00483316	2.31577	Y	0.0432996	0.0256173	Y	4	2.63326	0.0491856	0.129252	0.0974672	-1.00458	-1.37377	-1.0525	-0.225586	-0.467166	0.435182
568953176	UPI0003D78D82	myomesin-2 isoform X1	Myom2	-1.07287	0.475373	-3.24183	-3.81557	0.0316192	0.00728347	2.13766	Y	0.0450727	0.0256173	Y	4	2.63326	0.0491856	0.164287	0.118594	0.333115	0.129478	0.0371458	0.606114	1.62546	1.48677
260099682	Q3UIK4	N6-adenosine-methyltransferase non-catalytic subunit (Methyltransferase-like protein 14)	Mettl14	-1.0738	0.475066	-3.91936	-4.44796	0.0172569	0.00339851	2.46871	Y	0.0432996	0.0256173	Y	4	2.63326	0.0491856	0.112592	0.0874208	0.795927	0.590088	0.481989	1.18828	1.87273	2.02839
1039777946	UPI0007EDF65B	troponin I, cardiac muscle isoform X1	Tnni3	-1.07535	0.474557	-3.63498	-4.1924	0.0220624	0.0045912	2.33807	Y	0.0432996	0.0256173	Y	4	2.63326	0.0491856	0.131276	0.0986879	0.434291	0.237827	0.0727838	0.771275	1.63083	1.56884
568923359	E9Q8P5	PDZ and LIM domain protein 5	Pdlim5	-1.07827	0.473596	-4.02449	-4.54416	0.0158056	0.00304229	2.5168	Y	0.0432996	0.0256173	Y	4	2.63326	0.0491856	0.107678	0.0844576	2.36916	1.68614	1.64937	2.7533	3.20508	2.9811
74271799	Q80XL6	Acyl-CoA dehydrogenase family member 11 (ACAD-11) (EC 1.3.99.-)	Acad11	-1.08408	0.471691	-2.66081	-3.2233	0.0563428	0.0157073	1.8039	Y	0.055672	0.0289057	Y	4	2.63326	0.0491856	0.248995	0.169675	-1.28537	-1.44656	-1.80153	-1.13802	-0.293326	0.150141
6753992	P23242	Gap junction alpha-1 protein (Connexin-43) (Cx43) (Gap junction 43 kDa heart protein)	Gja1	-1.09243	0.46897	-2.48384	-3.03378	0.0679307	0.0203013	1.69248	Y	0.0607464	0.0318759	Y	4	2.63326	0.0491856	0.290156	0.194496	-0.648511	-0.389745	-0.470648	-0.270012	0.925587	1.11282
30061399	Q6GSS7	Histone H2A type 2-A (H2a-614) (H2a-615) (Histone H2A.2)	Hist2h2aa1; Hist2h2aa2	-1.09425	0.468378	-9.55948	-7.56578	0.000668926	0.000170083	3.76934	Y	0.042108	0.0256173	Y	4	2.63326	0.0491856	0.0196544	0.0313777	-0.364653	-0.533205	-0.552196	0.645945	0.426857	0.759908
256000782	B7ZNL3	Tpm1 protein (Tropomyosin 1, alpha, isoform CRA_g) (Tropomyosin alpha-1 chain)	Tpm1	-1.10156	0.466012	-3.17506	-3.76501	0.0336942	0.00776143	2.11006	Y	0.0455507	0.0256173	Y	4	2.63326	0.0491856	0.180553	0.128403	0.396272	0.12877	0.0651892	0.69273	1.83603	1.36615
122	P21450	Endothelin-1 receptor (Endothelin receptor type A) (ET-A) (ET-AR)	EDNRA	-1.11324	0.462255	-3.38228	-3.97728	0.027727	0.00595923	2.22481	Y	0.0435604	0.0256173	Y	4	2.63326	0.0491856	0.162499	0.117516	-0.576734	-0.396069	0.141496	0.436167	0.780318	1.29193
6680710	Q02013	Aquaporin-1 (AQP-1) (Aquaporin-CHIP) (Delayed early response protein 2) (DER2) (Water channel protein for red blood cells and kidney proximal tubule)	Aqp1	-1.11928	0.460322	-3.44151	-4.03882	0.0262575	0.00552684	2.25752	Y	0.0435604	0.0256173	Y	4	2.63326	0.0491856	0.158663	0.115203	-0.666866	-1.14233	-0.335691	0.115177	0.849261	0.248527
1039751654	UPI0007EDF2E4	myosin-15 isoform X1	Myh15	-1.12131	0.459676	-3.16544	-3.7653	0.034006	0.00775864	2.11021	Y	0.0455507	0.0256173	Y	4	2.63326	0.0491856	0.188224	0.133029	0.320747	0.0844933	0.140977	0.619043	1.54563	1.74548
6753866	O70433	Four and a half LIM domains protein 2 (FHL-2) (Skeletal muscle LIM-protein 3) (SLIM-3)	Fhl2	-1.12456	0.458642	-1.91697	-2.39462	0.127717	0.0497687	1.30304	Y	0.0807564	0.0453838	Y	4	2.63326	0.0491856	0.51621	0.330812	0.0128215	0.686904	-0.414244	0.246386	1.82331	1.58946
6671762	P07310	Creatine kinase M-type (EC 2.7.3.2) (Creatine kinase M chain) (M-CK)	Ckm	-1.13171	0.456375	-2.80563	-3.39479	0.0485323	0.012507	1.90285	Y	0.0532311	0.0277988	Y	4	2.63326	0.0491856	0.244061	0.1667	0.286787	0.197358	0.0939453	0.527321	1.77093	1.67496
156616286	Q8C6K9	Collagen alpha-6(VI) chain	Col6a6	-1.14503	0.452179	-2.26748	-2.8037	0.0859666	0.0278944	1.55448	Y	0.0682331	0.0343866	Y	4	2.63326	0.0491856	0.382509	0.250187	0.249936	-0.667969	-0.634271	0.0127676	1.37487	0.995163
755537752	UPI0000F49F64	polymerase I and transcript release factor isoform X1	Ptrf	-1.15122	0.450245	-1.48787	-1.88238	0.211002	0.10413	0.982423	N	0.101705	0.0657616	N	4	2.63326	0.0491856	0.897996	0.561037	0.998624	1.66895	1.25251	0.963896	3.11894	3.2909
10946574	Q04447	Creatine kinase B-type (EC 2.7.3.2) (B-CK) (Creatine kinase B chain)	Ckb	-1.17765	0.442071	-4.82229	-5.32115	0.00850884	0.00130517	2.88433	Y	0.0432996	0.0256173	Y	4	2.63326	0.0491856	0.0894575	0.0734704	0.205237	-0.192621	-0.148701	0.750413	1.17503	1.47142
6678369	P19123	Troponin C, slow skeletal and cardiac muscles (TN-C)	Tnnc1	-1.18123	0.440977	-3.23462	-3.86437	0.0318357	0.00685266	2.16414	Y	0.0450727	0.0256173	Y	4	2.63326	0.0491856	0.200037	0.140152	0.512867	-0.0148252	-0.163742	0.695188	1.66846	1.51433
256000786	Q8BP43	Tropomyosin 1, alpha, isoform CRA_c (Tropomyosin alpha-1 chain)	Tpm1	-1.18433	0.440028	-2.9863	-3.60611	0.0404859	0.00950128	2.02222	Y	0.0485152	0.0262277	Y	4	2.63326	0.0491856	0.235924	0.161793	1.24801	0.875162	0.632821	1.39978	2.52481	2.3844
153792649	P13541	Myosin-3 (Myosin heavy chain 3)	Myh3	-1.18742	0.439086	-5.2189	-5.64585	0.0064323	0.00093854	3.02755	Y	0.0432996	0.0256173	Y	4	2.63326	0.0491856	0.0776506	0.0663506	1.252	0.842777	0.79096	1.95678	2.49802	1.99321
755494088	UPI0005ABA2CA	troponin T, cardiac muscle isoform X1	Tnnt2	-1.1883	0.438818	-4.35958	-4.94187	0.0120661	0.00195228	2.70946	Y	0.0432996	0.0256173	Y	4	2.63326	0.0491856	0.111444	0.0867291	0.669399	0.272374	0.133873	1.11147	1.82331	1.70578
568986971	UPI0003D7578E	myosin-6 isoform X1	Myh6	-1.22825	0.426836	-3.60084	-4.25874	0.0227411	0.00424236	2.37239	Y	0.0432996	0.0256173	Y	4	2.63326	0.0491856	0.174523	0.124767	-0.00574972	-0.4741	-0.437605	0.317453	1.30669	1.14314
84872217	Q9JKS4	Lim domain-binding protein 3	Ldb3	-1.3059	0.404468	-3.1037	-3.77338	0.0360913	0.00768001	2.11464	Y	0.0463279	0.0256173	Y	4	2.63326	0.0491856	0.265554	0.179661	-0.390025	-0.739687	-0.675692	-0.0989595	1.21862	0.992648
123	#N/A	#N/A	#N/A	-1.42714	0.371867	-7.4184	-7.59219	0.00176217	0.000166549	3.77846	Y	0.0432996	0.0256173	Y	4	2.63326	0.0491856	0.0555143	0.053002	-1.12089	-1.17379	-0.893474	0.564547	0.0218562	0.50687
569004268	UPI0003D74390	myotilin isoform X1	Myo	-1.54617	0.342417	-3.09667	-3.82557	0.0363384	0.00719289	2.1431	Y	0.0463279	0.0256173	Y	4	2.63326	0.0491856	0.373954	0.245028	-0.253503	-0.921869	-1.10677	-0.0627249	1.12677	1.29233
